# Supplementary material for: Proteomic analysis of giant panda testicular tissue of different age groups
Source: PeerJ journal article supplement (doi:10.7717/peerj.18249), 2024-10-16
Supplement: Table_S1.xlsx [file Table_S1.xlsx]

## Sheet: Identified Proteins
Protein FDR Confidence: Combined	Accession	Exp. q-value: Combined	Sum PEP Score	Coverage [%]	Peptides	PSMs	Unique Peptides	AAs	MW [kDa]	calc. pI	Score Sequest HT: Sequest HT	Razor Peptides	Abundances (Normalized): J8d	Abundances (Normalized): F18y	Abundances (Normalized): H22y	Abundance: J8d	Abundance: F18y	Abundance: H22y
High	G1LHJ8	0.000	2830.905	62	260	1641	259	4646	532.1	6.49	4483.15	1	32806464721.7031	29140447548.9672	21754809038.4928	32806464721.7031	27965022074.668	16671101509.6055
High	D2HCA8	0.000	2611.394	62	159	1418	2	4388	466.7	6.42	4681.04	161	22809275606.7129	34596956566.0472	17316513859.3754	22809275606.7129	33201434276.5347	13269956074.1416
High	G1M7J6	0.000	2576.500	63	159	1419	2	4396	468.0	6.42	4671.78	0	78566496.5	89657311.2077693	5152182.16534926	78566496.5	86040843.5	3948209.875
High	D2HS92	0.000	2494.644	76	261	1335	260	5840	623.7	6.10	3242.38	1	15705095904.0645	16532150874.3413	33920908597.0317	15705095904.0645	15865300742.75	25994202455.125
High	G1LBP4	0.000	2489.780	54	296	960	292	6616	764.1	5.26	2608.17	4	4793636326.75	5250149179.9375	7217010586.95904	4793636326.75	5038376211.125	5530525038.3125
High	G1MB00	0.000	2090.991	63	158	1163	157	2479	284.9	5.36	3490.52	1	19768543046.5938	22529639406.1992	27458788501.9992	19768543046.5938	21620871205.5625	21042163580.3672
High	G1LP52	0.000	1856.423	60	163	1874	163	3178	342.4	6.68	5419.52	0	19197519558.4141	41479619512.0224	93484372941.0246	19197519558.4141	39806474260.6758	71638756658.542
High	G1LCQ9	0.000	1843.423	62	144	969	130	2363	274.2	5.57	2803.69	15	20022134741.2344	19166440112.5332	29545180860.9391	20022134741.2344	18393331809.3047	22641003576.7656
High	G1LVE7	0.000	1780.521	42	235	639	51	7251	819.8	5.33	1664.13	146	3223222127.125	3158491733.36222	3132017994.65975	3223222127.125	3031089035.1875	2400121730.625
High	G1LIB6	0.000	1771.261	49	208	890	204	4622	523.4	6.10	2396.66	3	13339276664.5625	10769313658.0177	13752531505.3118	13339276664.5625	10334916568.0938	10538812284.375
High	D2I822	0.000	1674.905	69	117	1272	114	2523	266.6	5.97	3910.83	1	19715600439.5742	27585771297.9397	53667283842.7619	19715600439.5742	26473056118.8984	41126205019.9766
High	G1LEH3	0.000	1542.868	47	147	734	146	4377	482.0	5.22	1993.12	1	9060460906.75	9123758894.14815	5445028498.22531	9060460906.75	8755737826.26563	4172623287.84375
High	G1LT30	0.000	1521.003	64	122	818	1	2553	271.0	6.11	2484.94	116	12633808335.6875	12330902837.7739	19710858205.9718	12633808335.6875	11833516608.8125	15104785218.375
High	G1L8B1	0.000	1514.354	46	180	573	180	5148	569.7	6.11	1600.58	0	4896995745.30469	4824680753.29366	2728880843.93593	4896995745.30469	4630069718.125	2091190480.0625
High	D2HAK7	0.000	1509.375	65	122	818	1	2541	269.5	6.14	2491.55	0
High	D2GX06	0.000	1502.886	76	135	752	123	2602	277.7	5.66	2073.78	13	7022969346.3125	7403509840.05325	19411694591.816	7022969346.3125	7104877705.09375	14875530759.2461
High	D2HXH0	0.000	1472.331	42	190	505	8	5928	666.8	5.24	1364.27	0	132574460	112739422.473934	278070893.441767	132574460	108191901.75	213090727.8125
High	G1LYK1	0.000	1336.853	71	96	906	78	1675	191.5	5.69	2780.00	18	19441565664.1797	19522786552.9525	18930123654.1781	19441565664.1797	18735304459.375	14506494286.8398
High	D2GZG2	0.000	1263.916	54	105	970	76	1961	226.4	5.60	2754.94	29	12768193558.8125	16184750495.4532	39297650456.3318	12768193558.8125	15531913300.8438	30114496463.1641
High	G1LSI8	0.000	1230.447	46	102	726	81	1980	228.0	5.54	2027.05	6	14152071121.9375	25806811646.2204	5685139532.97317	14152071121.9375	24765853583.7734	4356624693.08594
High	G1LR17	0.000	1184.289	64	120	582	119	2136	244.4	6.06	1695.58	1	5464956405.32813	5487558993.90917	6693413667.61255	5464956405.32813	5266209729.375	5129283300.125
High	G1L4Y3	0.000	1134.007	43	91	786	87	2871	311.7	4.91	2011.22	5	21979168218.9258	19901883906.2574	13368107073.2591	21979168218.9258	19099110328.7188	10244220926.75
High	D2GXF5	0.000	1085.038	53	90	508	90	2476	271.8	5.62	1603.15	0	3975542458.90625	4781089614.67122	18910214202.0563	3975542458.90625	4588236896.17578	14491237315.5313
High	D2HSH8	0.000	1074.221	49	112	509	112	3047	330.8	5.59	1460.25	0	998136151.6875	1561720653.35546	30200250732.6257	998136151.6875	1498726211.125	23142995403.375
High	D2HDG9	0.000	1066.676	70	93	567	93	1495	168.6	7.47	1665.17	0	8573601385.10938	10431358277.5763	5726906175.91663	8573601385.10938	10010593145.8672	4388631222.90625
High	G1MG00	0.000	1055.491	60	95	493	95	2464	267.1	6.39	1416.52	0	7084549541.8125	5211560881.92104	4554275883.62899	7084549541.8125	5001344432.39063	3490023535.6875
High	G1LL53	0.000	1049.896	62	100	812	100	1702	190.5	6.40	2148.83	0	18720536432.0352	14242752669.5338	18338355807.4532	18720536432.0352	13668248990.9688	14053011940.6875
High	D2HGU8	0.000	1035.617	47	81	538	79	2470	270.7	4.78	1640.45	2	9404098077.0625	11018785982.0514	4828324916.39091	9404098077.0625	10574326036.2188	3700032239.3125
High	G1LDK5	0.000	1031.616	34	116	489	113	4543	504.0	5.34	1232.89	3	2933487079.74414	2765454946.10369	6095971219.49195	2933487079.74414	2653906000.73438	4671452404.84375
High	G1L6J5	0.000	1024.908	47	93	603	62	2018	233.6	5.55	1680.28	2	2641803023.12891	4291111719.58908	12522484131.1332	2641803023.12891	4118023024.92188	9596204854.4375
High	D2HEV8	0.000	1017.475	65	79	472	76	1805	196.0	6.48	1442.80	3	5789525090.70117	9123455984.40418	3465307136.66762	5789525090.70117	8755447134.85938	2655527195.625
High	G1M0D4	0.000	1001.867	53	93	344	79	2542	271.5	5.57	1068.67	0	1407545094.5625	1696532146.24255	1649208258.79662	1407545094.5625	1628099871.84766	1263817956.03125
High	G1M925	0.000	999.574	43	125	356	2	3267	376.1	5.02	1012.79	109	3925693802.625	3139092480.63603	2691117707.43832	3925693802.625	3012472281.625	2062251909.25
High	D2H8C5	0.000	982.083	56	116	538	116	2335	273.4	8.84	1303.72	0	4741004927.6875	5759369447.74188	5936524327.01272	4741004927.6875	5527056283.9375	4549265382.875
High	G1LET9	0.000	980.020	51	129	495	129	2677	293.3	7.55	1174.68	0	4401749158.375	5082103867.95019	2988047246.8153	4401749158.375	4877109269.3125	2289794356.6875
High	D2I0Z2	0.000	975.847	43	124	354	1	3225	371.7	5.02	994.37	0		6973570.35415611			6692280.5
High	D2HSF8	0.000	972.803	44	107	389	106	3136	355.4	6.24	1055.51	1	5341785713.3125	5011929480.85989	895642620.473	5341785713.3125	4809765475.75	686347051.625
High	G1M3B3	0.000	969.964	50	125	369	66	3135	348.1	6.09	942.74	48	1929112829.4375	1915124885.38272	3428102336.11049	1929112829.4375	1837875331.375	2627016487.6875
High	D2GUU4	0.000	965.313	48	104	301	103	3244	357.1	6.87	788.20	1	2257763210.3125	3292955499.87775	947731690.082093	2257763210.3125	3160128995.625	726263842.6875
High	D2I361	0.000	965.045	63	84	471	82	1742	191.4	7.33	1415.84	2	9713222637.625	4668528016.33592	6932381359.8137	9713222637.625	4480215645.75	5312408541.40625
High	D2HCZ7	0.000	961.850	64	86	372	82	1642	187.3	6.48	1152.32	4	2261351360.29688	2297361776.76674	7089613027.05869	2261351360.29688	2204694100.625	5432897996.42871
High	G1LX20	0.000	950.044	23	157	310	152	8798	1009.5	5.57	701.55	1	600466650.9375	635136480.639463	734242117.853357	600466650.9375	609517258.5	562662943.0625
High	G1LWJ9	0.000	929.810	48	81	354	81	2130	238.7	5.82	1159.12	0	2622494388.1875	3151044618.6048	9472910372.80417	2622494388.1875	3023942311.4375	7259261625.1875
High	G1LXY8	0.000	916.680	63	90	390	73	1671	189.2	5.91	1100.78	0	3486179010.6875	4191634841.38477	368110684.372396	3486179010.6875	4022558702	282089839.3125
High	G1L612	0.000	913.983	57	73	662	73	1802	193.5	5.27	1814.58	0	5644141058.83594	11459584712.5108	28562502813.0073	5644141058.83594	10997344461.2813	21887959711.4141
High	D2I4I6	0.000	899.810	36	136	320	135	4415	499.6	6.60	771.57	1	1641628539.375	496805892.065566	1899493543.36999	1641628539.375	476766450.3125	1455616071.9375
High	G1LEJ5	0.000	898.741	82	74	3164	4	613	69.2	5.95	9088.33	66	144795571695.195	164449129946.636	156389412088.589	144795571695.195	157815817392.297	119844019744.934
High	D2GWS2	0.000	893.401	56	106	392	94	2725	290.7	6.05	1010.03	0	787367928.75	1327184674.83065	7254240128.2247	787367928.75	1273650607.67969	5559054705.5
High	G1LV71	0.000	883.107	43	149	326	148	4020	459.7	6.61	812.72	1	1304549846.28125	2353906967.26509	842478121.65303	1304549846.28125	2258958452.53125	645606139.8125
High	G1LB35	0.000	870.863	76	58	677	56	1099	124.1	4.98	1905.18	3	15385182444.9063	14841639310.0439	4716313358.72725	15385182444.9063	14242978603.2695	3614195767.71875
High	D2I061	0.000	866.510	90	74	3199	4	549	62.0	5.49	9041.02	0	7980478082.58008	13156690826.2989	10834588616.6425	7980478082.58008	12625995148.7969	8302740158.42969
High	D2HVQ7	0.000	808.547	59	60	2145	45	735	84.9	5.01	6091.64	15	64334776253.396	64028896625.5263	32723543030.2125	64334776253.396	61446191055.9414	25076639682.0742
High	G1L0E7	0.000	796.157	65	63	1112	13	997	110.3	7.94	3268.75	54	29766414310.002	49347616958.1638	44267710941.7825	29766414310.002	47357103738.6563	33923143218.7031
High	G1M6T5	0.000	789.045	70	75	449	75	1233	139.2	7.59	1212.21	0	6731649776.75	6837176747.45964	7875465806.41046	6731649776.75	6561388542.5	6035111117.8125
High	G1L3F3	0.000	784.275	44	90	280	82	2672	303.7	6.61	744.58	8	2969723328.8125	2915344546.81755	1254453179.58015	2969723328.8125	2797749570.25	961310037.648438
High	D2HS50	0.000	776.132	44	86	348	86	2446	268.7	5.59	948.65	0	3721540610.875	2566230629.17476	3857673104.93796	3721540610.875	2462717707.85156	2956204295.3125
High	G1L4R0	0.000	771.709	58	82	325	80	2225	243.2	6.55	944.12	2	1694704037.4375	1710299384.35731	2938845620.84223	1694704037.4375	1641311786.90625	2252090265.625
High	D2HQU4	0.000	767.818	40	86	354	85	2346	265.3	4.98	966.22	1	2498644257.21875	2341308740.51476	4370763478.61195	2498644257.21875	2246868394.9375	3349394678.55078
High	G1MDW7	0.000	759.925	48	59	219	59	2044	216.5	6.27	772.92	0	1109200890.3125	1037617281.55126	2447300948.63173	1109200890.3125	995763367.5625	1875410741
High	G1LVM5	0.000	756.217	81	54	1583	46	486	55.6	5.30	4615.14	9	54170165800.8555	63473097959.9747	94125146163.1873	54170165800.8555	60912811397.8184	72129792705.4414
High	D2HTG8	0.000	753.030	70	59	619	36	911	105.0	5.45	1711.28	24	8400372761	11060630398.7972	24315693863.9502	8400372761	10614482593.0469	18633553618.6572
High	G1LJ40	0.000	746.210	62	55	1468	53	803	92.3	4.86	4155.80	2	58042193018.7383	53634129917.2067	41364972437.458	58042193018.7383	51470713501.2227	31698722485.9902
High	G1LJK8	0.000	744.800	21	125	234	120	7547	853.3	5.19	521.64	1	1283859438.875	1100966923.70564	299895604.258863	1283859438.875	1056557702.9375	229815396.3125
High	D2HVC4	0.000	740.870	51	73	363	72	1356	156.4	5.55	1118.09	1	5179563668.625	5571438442.04648	2920009062.99609	5179563668.625	5346705768.9375	2237655472.5
High	D2I0Z3	0.000	734.150	87	35	763	34	587	63.7	5.83	2586.39	0	31337869816.9141	41038548358.8054	2019447534.94647	31337869816.9141	39383194401.4531	1547538973.51367
High	D2I4G8	0.000	724.084	43	80	221	80	2801	308.3	5.40	630.49	0	687264205.8125	1039627462.26823	1760771691.62176	687264205.8125	997692464.5	1349311021.5
High	G1L6B4	0.000	720.899	51	56	322	54	1593	175.5	5.10	1030.76	2	4387320125.53906	7387550162.65877	3819779080.788	4387320125.53906	7089561786.21875	2927165422.9375
High	D2H3D2	0.000	712.475	49	84	279	3	2044	232.6	6.18	742.01	76	1370103623.5	1414659690.6918	3100362633.62768	1370103623.5	1357597182.125	2375863658.02344
High	D2GTZ0	0.000	706.022	44	89	302	88	2376	266.7	7.11	777.18	1	1846922391.5625	1797709990.48727	1821769443.36356	1846922391.5625	1725196549.6875	1396054695.9375
High	D2HSC5	0.000	705.314	36	100	272	2	3631	408.0	6.89	645.15	0	55274931.5	47951924.7958275	28888968.1866966	55274931.5	46017709	22138136
High	G1MI18	0.000	704.389	52	72	293	71	1845	204.0	7.18	843.81	1	2462577137.5625	2317178482.64938	1620365168.96168	2462577137.5625	2223711468.71875	1241714977.4375
High	D2HEE4	0.000	704.075	63	62	561	62	1134	123.8	5.76	1657.79	0	12760161936.5864	13014582150.3748	11099240537.129	12760161936.5864	12489618648.3145	8505547685.875
High	D2HNS5	0.000	700.474	76	51	1104	1	687	76.2	6.76	3277.36	0	1474106540.5	2026563497.51441	2864677331.10614	1474106540.5	1944818893	2195253771
High	G1MGF3	0.000	699.144	34	101	275	3	3763	423.2	6.95	646.62	80	1408140345.4375	1252800725.41313	1093386850.37846	1408140345.4375	1202267051.0625	837882012.1875
High	G1M5W2	0.000	694.779	48	82	275	1	2060	234.4	6.09	730.82	0	4418626.5	29387906.3621003	53596827.0992637	4418626.5	28202499.25	41072212.75
High	G1L6G4	0.000	691.848	36	89	230	89	4181	451.4	5.34	661.69	0	856645589.25	698297680.149789	2988524121.0605	856645589.25	670130752.359375	2290159794
High	D2GWV2	0.000	686.401	42	93	364	92	2565	291.7	5.90	893.83	1	3990227601.71875	4701470405.17651	1925959329.74498	3990227601.71875	4511829251.875	1475897280.125
High	G1L9E1	0.000	685.648	62	69	293	3	1757	187.1	7.87	795.69	61	3006837014.375	2876561922.97469	2264825520.05373	3006837014.375	2760531304.125	1735576537.5625
High	D2H7E0	0.000	684.272	33	64	230	59	2883	311.0	4.84	616.38	1	444360980.5625	476921029.247718	3183437193.20033	444360980.5625	457683674.5	2439525187.4375
High	G1L4F4	0.000	683.790	54	86	236	86	2086	234.3	5.33	607.09	0	2462138706.625	2048564847.06859	417248094.102052	2462138706.625	1965932783.75	319744720.3125
High	G1MD73	0.000	682.964	83	30	2442	3	444	49.6	4.86	7216.97	11	26184941760.3594	21197510881.793	12896756525.4902	26184941760.3594	20342476166.2031	9883016522.95313
High	D2GU94	0.000	680.848	62	79	380	30	1367	154.3	6.37	993.45	46	5746130301.5	6028974840.85745	3573372524.48847	5746130301.5	5785786722.35156	2738339646.28125
High	G1L9E8	0.000	679.910	61	67	286	1	1729	184.3	7.72	789.27	0	14161958	33144303.2486604		14161958	31807376
High	D2HU61	0.000	679.154	42	79	268	1	2487	272.9	6.39	671.85	0
High	G1LRK4	0.000	678.556	41	79	269	1	2525	277.2	6.32	672.92	67	1248271359.5625	1772372918.87282	1464706338.07637	1248271359.5625	1700881488.4375	1122430815.21094
High	D2I538	0.000	673.104	60	63	321	2	1439	160.4	6.37	884.46	55	4743608748.62109	1347770256.25753	10406931796.1096	4743608748.62109	1293405837.52148	7975019043.8125
High	G1L9F2	0.000	665.924	61	67	284	1	1727	184.1	7.53	776.26	0
High	D2HHJ2	0.000	662.349	50	88	356	2	2023	224.1	7.97	910.31	76	3700366254.77148	3761093341.35703	2213667632.13638	3700366254.77148	3609383765.95605	1696373327.78125
High	G1M647	0.000	659.359	59	62	306	1	1478	164.5	6.48	839.77	0	3267774		4402000.27821519	3267774		3373332
High	G1MDQ2	0.000	658.110	60	66	268	66	1262	139.9	6.71	679.20	0	2886997501.25	3295784457.44101	1591723887.93328	2886997501.25	3162843842.76563	1219766648.5625
High	G1LUW6	0.000	658.070	43	71	230	69	2157	244.2	8.63	656.34	1	1494037923.6875	1387805632.32828	1678095985.17874	1494037923.6875	1331826324.15625	1285955140.41406
High	D2H949	0.000	654.297	71	68	526	65	1208	133.8	5.80	1403.46	3	16946529424.5625	17162613447.2924	7733196935.53683	16946529424.5625	16470332622.9297	5926087922.8125
High	D2HDI4	0.000	644.040	62	59	277	59	1295	144.7	7.02	784.06	0	3373834124.5	3427300208.57259	3554298145.24814	3373834124.5	3289054700.625	2723722606.34375
High	G1M785	0.000	639.710	81	30	1844	3	445	49.9	4.89	5272.13	41	57315725399.8926	62668394786.3357	51652465853.3274	57315725399.8926	60140567183.7734	39582213750.4688
High	G1LHU6	0.000	637.911	72	38	1006	5	567	61.7	8.28	3176.00	0	2105578834.60938	2429627440.5709	4176496894.31261	2105578834.60938	2331624622.25781	3200524700.375
High	G1MG01	0.000	637.698	50	50	230	50	1281	141.6	5.81	744.35	0	3624501908.78125	3224372033.49707	2283507986.67831	3624501908.78125	3094311950.5	1749893247.8125
High	G1LKH1	0.000	636.410	49	87	352	1	2040	226.1	7.80	892.72	0	14964316	26176545.8699498	7233746.40926069	14964316	25120674	5543350
High	G1M3F6	0.000	634.175	62	45	450	45	1023	106.2	5.54	1430.78	0	8508347073.79004	9743492651.16548	9826324393.9907	8508347073.79004	9350473654.0625	7530089147.125
High	D2I2J1	0.000	632.062	31	110	226	3	4561	501.6	6.86	500.90	86	1480530644.5	1463263748.54317	369102161.591001	1480530644.5	1404240719.375	282849626.140625
High	D2I042	0.000	628.643	69	55	709	54	858	95.2	6.95	1967.94	1	13192287748.2344	13681018721.1902	22024558715.5445	13192287748.2344	13129173458.957	16877815539.6094
High	D2GYC0	0.000	626.127	81	48	1391	34	646	70.9	5.52	4161.39	12	35644450653.3398	41818251853.9259	34279934963.9837	35644450653.3398	40131447338.0664	26269330818.582
High	G1MGS5	0.000	625.817	57	52	233	52	1399	151.5	5.86	729.20	0	3488699481.96875	2165202723.0029	1001335377.33938	3488699481.96875	2077865888.75	767341312.5
High	G1LN26	0.000	624.926	31	109	225	2	4632	509.3	6.83	497.79	0	8545096.75	2668182.30128383	1879056.11117353	8545096.75	2560557	1439954.5
High	G1LWC5	0.000	623.573	44	81	232	81	2246	254.9	6.80	565.28	0	1279865156.1875	1005828943.26772	761896592.231612	1279865156.1875	965257261.5625	583855064.25
High	G1MBL1	0.000	623.263	36	69	167	69	2767	298.0	5.38	480.65	0	791434067.5625	842587395.489078	582297330.802431	791434067.5625	808600316.625	446224919.4375
High	G1LA19	0.000	622.108	61	52	423	39	865	98.5	7.20	1133.25	10	9316003746.92969	9037813278.34796	3745919712.41805	9316003746.92969	8673258961.14063	2870565660.3125
High	G1MDU7	0.000	619.171	73	50	1493	48	655	72.3	5.14	4425.53	2	58472151003.9766	67043028462.2919	42362375049.4442	58472151003.9766	64338743176.4766	32463050049.6543
High	G1MAF6	0.000	616.764	67	45	672	45	806	89.3	5.29	1956.64	0	20237825112.9609	20306829883.2408	16481090782.6333	20237825112.9609	19487722177.125	12629756342.1563
High	G1LAM8	0.000	615.044	42	73	211	67	2370	272.0	5.40	580.13	0	1101022376.34375	381444859.28188	489761105.587467	1101022376.34375	366058685	375312745.4375
High	D2HQF6	0.000	609.856	58	59	290	59	1174	133.8	7.40	777.52	0	3800646523.625	3368626230.58176	2891512893.31718	3800646523.625	3232747429.19531	2215818345.0625
High	D2H5Q1	0.000	609.063	59	50	493	27	910	104.8	5.30	1263.83	3	2558051928	3552349956.84666	7254601074.80745	2558051928	3409060371.95313	5559331305.35938
High	D2HVM4	0.000	604.891	56	51	335	51	981	109.3	8.78	921.29	0	3344396729.125	4508959323.6553	4253814773.59273	3344396729.125	4327083405.5625	3259774782.125
High	G1M886	0.000	600.090	37	83	208	83	3146	346.8	6.51	544.57	0	911049774	1109993662.60158	803124562.732509	911049774	1065220334.21875	615448799.6875
High	G1MDQ7	0.000	598.690	54	57	396	57	1140	126.9	5.26	965.79	0	8435704836.48438	10492369062.6599	4919446029.23958	8435704836.48438	10069142965.625	3769859987.25
High	G1LJY9	0.000	598.152	74	32	1761	5	454	50.3	5.06	5584.93	5	13635980077.1367	11969823189.314	17311454238.1105	13635980077.1367	11487001672.042	13266078795.3496
High	D2H547	0.000	597.479	67	38	354	38	843	93.4	4.81	1080.39	0	9709756271.98438	9289233016.51354	6930176705.63503	9709756271.98438	8914537291.40625	5310719075.25
High	G1M646	0.000	590.895	47	46	445	40	1042	114.7	5.34	1406.68	7	9240752248.1875	8750644324.76324	3674702207.35357	9240752248.1875	8397673415.90625	2815990405.0625
High	G1M4C5	0.000	590.517	57	60	350	60	1265	144.5	6.49	839.65	0	4912279195.25	4992612719.42375	3266835492.34917	4912279195.25	4791227886.0625	2503434804.3125
High	G1M502	0.000	590.191	78	31	1113	28	521	56.6	6.57	3484.66	3	50707313642.8906	49210725406.4889	28786416384.0526	50707313642.8906	47225733921.5664	22059548708.8477
High	G1LAV0	0.000	586.275	45	57	185	57	2362	251.3	5.69	541.80	0	1469403550.875	1775328686.50259	1174508830.21477	1469403550.875	1703718030.5625	900047244.625
High	D2H496	0.000	585.326	75	30	1737	13	375	41.7	5.48	5204.31	22	81051206830.9766	73976224852.4532	92910224079.1455	81051206830.9766	70992278259.3906	71198776057.4219
High	G1L659	0.000	584.207	53	57	317	57	1276	141.1	7.01	885.85	0	4019381884.125	4755288652.56292	3340667149.67873	4019381884.125	4563476656.17969	2560013331.46875
High	D2H363	0.000	583.805	80	29	809	29	528	56.3	5.27	2565.03	0	25174988142.7363	24480135877.7672	23026387814.0233	25174988142.7363	23492691354.9375	17645535199.5
High	G1LBL4	0.000	583.745	39	80	188	79	2470	285.7	4.96	463.75	1	1100266508.75	396985547.564759	593196758.646776	1100266508.75	380972515.34375	454577347.0625
High	G1LNS0	0.000	579.905	65	57	316	38	949	104.6	5.10	900.01	18	5515290734.15625	4757955704.59328	3158375420.54346	5515290734.15625	4566036128.5	2420319900.21875
High	G1MG56	0.000	576.476	53	72	252	72	1622	185.1	5.36	656.18	0	3815454977.3125	3947469967.32434	214608290.991709	3815454977.3125	3788242599.5625	164458193.9375
High	D2H9A4	0.000	574.372	29	106	179	99	4480	510.0	5.85	402.57	5	1060300214.8125	650712373.289226	731962827.474917	1060300214.8125	624464873.1875	560916281.84375
High	G1L7D3	0.000	574.368	61	53	641	48	871	97.8	5.83	1724.63	8	26166987504.2969	24268677024.1983	3256055781.90033	26166987504.2969	23289762024.5625	2495174118.28125
High	G1LHS7	0.000	573.729	74	39	814	6	575	62.7	7.74	2441.67	41	29313297360.6172	20636969993.7155	30046045193.8552	29313297360.6172	19804545570.5078	23024824925.0391
High	D2I331	0.000	572.071	52	46	752	1	991	110.8	5.31	2057.89	51	21783581251.7695	23829323092.6922	4690769235.21716	21783581251.7695	22868130120.2305	3594620846.36426
High	G1LX08	0.000	570.679	83	34	1984	5	451	50.0	5.10	6250.77	34	58773094958.9746	69972212316.0207	45412901336.2812	58773094958.9746	67149773823.5742	34800723218.6348
High	G1LWA0	0.000	570.426	62	51	273	51	1179	129.8	6.83	763.07	0	3848955394	2849699378.79111	2263851691.53426	3848955394	2734752302.625	1734830275.25
High	G1LM02	0.000	568.682	39	89	242	88	3057	333.9	6.70	592.62	0	1086765730	1401943714.81527	1910138816.11444	1086765730	1345394125	1463773735.9375
High	G1L8X7	0.000	566.960	49	59	249	1	1765	197.3	6.80	684.34	55	1545059027.25	1517350173.87632	2128422328.15156	1545059027.25	1456145484.25	1631048317.875
High	D2GW48	0.000	566.352	69	43	822	42	505	56.8	6.21	2113.37	0	47323795920.3418	44160926155.4458	33392353959.5866	47323795920.3418	42379626211.9727	25589161528.375
High	G1LZE2	0.000	566.347	46	46	1360	30	741	85.0	5.12	3854.39	0	8558651432.95898	8540225382.56383	9951870158.64483	8558651432.95898	8195742050.45117	7626297125
High	G1LPG5	0.000	565.892	29	87	181	86	3995	438.5	6.19	447.43	0	1019318632.5	636183460.455924	458839095.523608	1019318632.5	610522006.75	351616652.875
High	G1MJ97	0.000	565.768	66	51	285	50	972	109.4	5.00	793.65	0	1867916504.3125	2760072079.7979	3482657970.46825	1867916504.3125	2648740260.75	2668823451.6875
High	D2HV59	0.000	564.025	27	112	198	104	4516	516.8	6.27	401.30	5	1257421258	634697955.674969	315160102.134565	1257421258	609096422.125	241512855.625
High	D2HLF8	0.000	562.764	48	61	173	61	1458	162.9	5.92	488.56	0	1693685065.4375	1500408940.90426	840751936.561732	1693685065.4375	1439887602.375	644283333.125
High	G1L094	0.000	561.792	67	32	433	28	675	73.2	6.35	1403.75	1	5684408281.78125	5739073442.30924	11999948546.6527	5684408281.78125	5507578949.58984	9195776436.25
High	D2HWM8	0.000	560.490	72	58	324	58	861	98.4	9.41	842.41	0	7920591131.25	6913085276.87262	331401747.525621	7920591131.25	6634235182.79688	253959120.65625
High	G1LMU0	0.000	559.856	80	42	494	41	597	65.2	7.33	1475.63	0	14756771797.3906	9853251390.60962	22638927367.4634	14756771797.3906	9455805103.28906	17348617289.3438
High	D2HRR7	0.000	559.313	50	59	248	1	1721	192.3	6.74	683.48	0	4674418.5	5450944.87692817	9198734.21062087	4674418.5	5231072.5	7049155.5
High	G1L9W6	0.000	559.086	63	53	255	53	1051	117.5	5.90	726.79	0	2972803622.34375	2873285354.92119	1598055841.07091	2972803622.34375	2757386901.5625	1224618938.15625
High	G1KZJ5	0.000	557.373	52	46	736	1	998	111.4	5.27	2020.67	0	81919108.59375	113622309.345105	19718466.3813116	81919108.59375	109039176	15110615.5
High	G1M6Q8	0.000	554.550	40	61	232	44	1929	219.3	6.00	569.50	15	1068335041.28125	1264021143.79817	2914041353.84441	1068335041.28125	1213034876.34375	2233082309.625
High	G1MA68	0.000	553.367	28	104	187	103	4456	511.3	5.73	426.10	0	753453468.375	4627973359.29714	389389060.30488	753453468.375	4441296824.15625	298395841.5625
High	G1MGY6	0.000	550.192	81	32	807	24	417	44.5	7.85	2333.85	0	15073386417.2031	13980479759.5568	21128218170.4461	15073386417.2031	13416555268.5313	16190933655.7891
High	G1LCL2	0.000	550.123	57	47	221	4	1359	148.8	7.12	694.35	40	6559252311.8125	4243538910.72993	1266252877.75826	6559252311.8125	4072369139.625	970352358.625
High	G1M4I7	0.000	549.248	44	77	191	66	2349	265.5	6.46	485.32	10	733118685.0625	1059695584.84212	661835245.563663	733118685.0625	1016951108	507176254.3125
High	G1LW45	0.000	549.029	50	65	215	65	1453	165.7	6.57	539.40	0	3884297434.875	3471585417.85776	2818375610.46926	3884297434.875	3331553596.8125	2159771929.5625
High	G1M8C8	0.000	548.105	60	53	324	34	951	105.7	5.25	842.26	0	2458972669.84375	2235110472.40814	2608530028.53336	2458972669.84375	2144953799.875	1998963485.25
High	D2HNP1	0.000	547.883	58	53	266	46	1023	115.9	6.76	702.72	7	2534245241.92188	2539397042.24197	2704886126.09535	2534245241.92188	2436966495.56641	2072802896.14453
High	D2HCF9	0.000	547.749	64	49	278	49	1010	108.2	6.77	809.46	0	3509289134.60938	3772117117.56505	4055692322.51573	3509289134.60938	3619962880.92969	3107949983.875
High	D2GYI3	0.000	546.505	76	42	1657	27	636	69.8	5.67	5075.48	1	46351758727.918	42784902410.8106	1850665120.21785	46351758727.918	41059106534.6641	1418197972.91016
High	G1LZI4	0.000	544.976	76	37	642	37	534	57.2	6.46	2082.86	0	11191668542.3125	15861587403.3433	7211884244.52786	11191668542.3125	15221785496.8906	5526596629.89063
High	D2HV43	0.000	543.414	54	43	187	1	1367	149.5	5.80	562.13	0		42143075.2760199	30465693.5378212		40443168.5	23346409
High	G1LYD2	0.000	542.082	58	53	326	51	1125	124.3	6.68	917.16	2	5083409996.625	5104369273.03416	1800282441.57036	5083409996.625	4898476564.5	1379588819.9375
High	G1L5M1	0.000	541.885	52	43	193	1	1395	152.3	5.86	580.70	37	1383427244.125	2946648111.72856	1748469190.8812	1383427244.125	2827790456.96875	1339883393.875
High	G1L741	0.000	541.709	71	41	251	41	693	76.6	6.87	711.26	0	3840078725.5	4197205935.67602	2892836629.12568	3840078725.5	4027905077.5	2216832747.625
High	G1M044	0.000	541.010	57	48	352	47	856	94.3	6.25	892.04	0	12815228174.5898	9003038072.76202	1224111578.83468	12815228174.5898	8639886467.79688	938058723.1875
High	G1LN78	0.000	540.291	48	71	332	57	1533	174.2	8.70	793.67	0	2366390092.5625	4184318906.24334	874338592.412044	2366390092.5625	4015537866.53125	670021391.6875
High	G1LGZ5	0.000	538.887	68	59	434	59	1104	120.9	7.53	1196.50	0	6774058070.59375	7321513229.90896	3445654584.1768	6774058070.59375	7026188556.3125	2640467091.125
High	G1M664	0.000	537.888	47	52	202	51	1831	201.8	5.02	569.34	0	1320198201.625	2255316866.76542	2693904706.31626	1320198201.625	2164345137.75	2064387636.625
High	D2HZI0	0.000	537.838	54	48	246	47	1243	136.1	5.45	729.82	1	3870975567.5	4710496662.16522	3781457342.59045	3870975567.5	4520491420.6875	2897798785.59375
High	G1M5E8	0.000	536.016	44	62	184	45	1795	202.9	6.43	491.53	16	1472757859.8125	1153932904.92514	516883771.822851	1472757859.8125	1107387218.5625	396097332.478516
High	G1LXI8	0.000	536.008	58	43	400	3	900	95.9	8.81	1133.94	45	7166492438.75	8068891700.23115	8711490326.74735	7166492438.75	7743420348.5	6675771746.84375
High	G1ME72	0.000	535.335	45	51	213	51	1295	150.2	8.68	585.31	0	2949279072.6875	2989919820.643	1811945376.99549	2949279072.6875	2869316733.90625	1388526337.15625
High	G1LW88	0.000	532.983	65	63	283	63	1112	129.1	5.71	741.94	0	4527551407	4643373552.55625	2024929316.35621	4527551407	4456075826.5625	1551739761.21875
High	G1L5G2	0.000	531.805	67	39	342	30	506	56.5	6.70	961.47	9	8254039809.75	7057808629.20787	8202951275.39495	8254039809.75	6773120892.63281	6286069123.77344
High	G1LDF7	0.000	530.794	42	65	286	64	1914	210.1	6.00	706.55	1	2119115222.1875	2714574924.00717	3699777183.44739	2119115222.1875	2605078303.8125	2835205810.3125
High	G1LJ76	0.000	529.977	61	46	428	46	966	108.7	6.18	1246.54	0	6863395308.9248	7540748079.92649	7005616224.79646	6863395308.9248	7236580226.17188	5368529735.85156
High	G1M4T7	0.000	528.359	34	58	196	4	2040	229.6	4.96	542.94	48	2768177886.4375	2514399195.93116	1022583452.55504	2768177886.4375	2412976976.4375	783624094.765625
High	D2HIP6	0.000	526.814	63	42	238	40	644	70.5	6.89	770.49	2	5903683199.6875	4813565934.91874	4580480571.39293	5903683199.6875	4619403233.3125	3510104659.3125
High	G1L445	0.000	526.601	41	31	575	31	1014	107.6	6.23	1984.51	0	6908400485.36719	13820032252.673	29877706144.1942	6908400485.36719	13262579662.4844	22895823683.0625
High	D2HGX9	0.000	526.497	58	41	398	1	896	95.5	8.76	1134.52	0	12720784	28531950.8076616	19395293.0986638	12720784	27381070	14862962
High	D2HH78	0.000	524.923	32	80	137	4	4136	458.7	6.25	368.83	52	401774603.25	415949491.65588	102766166.622239	401774603.25	399171519.125	78751562.125
High	D2HPW2	0.000	523.031	44	64	197	64	1989	219.1	7.44	510.70	0	673662948.375	811642673.017173	961004115.120845	673662948.375	778903797.875	736434740.75
High	G1MKK0	0.000	522.621	72	40	555	29	643	70.3	5.73	1536.81	0	7086614016.5	7668402350.02421	7238052525.5507	7086614016.5	7359085361.86719	5546649854.375
High	D2HLD2	0.000	522.036	51	60	292	1	1243	138.7	6.92	765.02	0
High	G1LY16	0.000	521.953	51	39	435	39	896	100.0	6.04	1248.41	0	10632952363.6055	13172689411.6047	8088665167.60312	10632952363.6055	12641348406.1719	6198489623.5
High	D2HN23	0.000	516.806	32	55	185	1	2061	231.8	4.91	516.67	0	41444773	24842634.4698258		41444773	23840568
High	G1L613	0.000	515.342	51	45	299	45	1220	135.8	5.24	792.07	0	3667222146	3847840109.60871	4943337810.80681	3667222146	3692631467.79688	3788168689.25
High	G1M3M6	0.000	515.020	63	49	506	49	1062	118.2	6.15	1561.20	0	9682368915.26563	8073032397.01699	10612422717.4494	9682368915.26563	7747394023.8125	8132490433.375
High	G1L6E2	0.000	514.525	66	39	322	39	763	82.7	9.03	958.49	0	8651617937.36719	6394248270.21157	9483117474.82279	8651617937.36719	6136326277.3125	7267083511.07813
High	G1MDT9	0.000	513.331	50	60	299	1	1271	141.6	6.93	771.43	57	4299985936.875	5251786807.97255	6689780598.57742	4299985936.875	5039947782.875	5126499213.96875
High	D2HY78	0.000	512.602	79	24	1754	7	358	40.0	4.86	5149.64	1	2608742420.875	3831371647.08694	1133811844.18646	2608742420.875	3676827286.4375	868860412.140625
High	G1LNI2	0.000	511.641	79	37	529	37	548	59.6	5.59	1444.63	0	14180940464.4531	15197200044.1318	8963021475.40903	14180940464.4531	14584197239.7007	6868524590.8125
High	G1L4F6	0.000	511.308	44	30	445	30	1027	108.9	5.45	1429.06	0	4104948155.625	9349346684.28933	18233575141.6397	4104948155.625	8972226180.48438	13972716631.5938
High	G1M5B6	0.000	510.379	70	40	764	40	575	61.3	5.74	2456.29	0	26889080643.9609	25427976538.509	27130880421.1041	26889080643.9609	24402299381.9375	20790881719.2969
High	G1LJY3	0.000	509.581	28	90	184	89	3838	435.4	8.18	416.86	1	661948832	730073563.106385	1109853183.86736	661948832	700624905.4375	850500459.75
High	G1MFJ8	0.000	509.469	64	44	291	44	913	100.7	5.17	782.87	0	7831891203.86035	8010649354.41558	6048727871.63826	7831891203.86035	7687527298.6875	4635248977.53125
High	G1MGB4	0.000	509.424	35	78	135	2	3707	411.0	7.28	360.47	0	2736209.75		1880302.16700665	2736209.75		1440909.375
High	G1MHR4	0.000	507.918	36	69	161	69	2249	261.7	5.38	425.75	0	2035675071	1613834723.79794	358032861.03386	2035675071	1548738179.125	274367022
High	G1L6M9	0.000	507.302	57	45	258	45	957	107.6	6.06	693.06	0	2857378688.5625	2669079282.09353	3945313234.29356	2857378688.5625	2561417799.6875	3023364502.98047
High	G1LDU4	0.000	507.258	35	61	184	52	2267	247.1	7.11	505.17	9	370450406.125	379364110.335124	4213832050.71771	370450406.125	364061866.3125	3229135302.34375
High	G1LMH6	0.000	506.598	69	28	741	6	469	50.8	9.07	2594.95	23	35862582739.7852	38230735217.733	49296448444.2798	35862582739.7852	36688638789.7148	37776755227.9355
High	D2GVI6	0.000	505.754	60	44	369	41	839	94.2	5.21	1071.11	0	6819859710.1875	8346567477.22366	3324773095.10197	6819859710.1875	8009895639.25	2547833431.53125
High	G1L2R9	0.000	505.361	64	46	557	3	740	82.4	7.14	1407.55	44	6146371659.375	6026189591.82253	5309353258.33117	6146371659.375	5783113820.6875	4068652910.875
High	G1M049	0.000	505.104	43	65	201	65	2012	228.1	6.33	548.28	0	1027698780.3125	1146848296.35873	1233370304.62278	1027698780.3125	1100588378.75	945153851.3125
High	D2H644	0.000	504.890	37	52	165	52	1813	201.0	6.34	500.71	0	1115359737.5	1401551283.74501	3983678720.30699	1115359737.5	1345017523.25	3052764665.0625
High	G1LAN9	0.000	503.041	59	42	339	41	890	98.5	7.69	900.24	1	5510435280.11719	7386616208.38866	3162534916.03389	5510435280.11719	7088665504.45313	2423507396.4375
High	G1KZU2	0.000	502.094	59	42	233	41	825	91.7	6.90	708.26	0	310626431.0625	741544517.535391	15878393582.7268	310626431.0625	711633161	12167898636.0547
High	G1MDC4	0.000	500.773	61	45	248	45	953	105.9	5.39	701.45	0	2666569574.57031	2748790794.53344	2683628503.2715	2666569574.57031	2637914023.75	2056512797.375
High	G1MDU1	0.000	495.974	61	35	451	34	683	74.1	6.30	1419.53	0	11800304472.8906	12147772499.7588	8663391461.18569	11800304472.8906	11657773119.0625	6638912720.92188
High	G1L9V0	0.000	495.731	52	46	375	45	1072	123.2	6.11	1008.21	1	4546651197.8125	5710837310.01028	5294855790.11362	4546651197.8125	5480481765.79688	4057543240.1875
High	D2HLW8	0.000	495.069	55	41	293	36	989	110.3	5.47	758.57	5	5229334669.375	5585364534.91348	4623088255.97358	5229334669.375	5360070131.09375	3542755694.46875
High	D2GV47	0.000	494.705	57	53	272	52	1092	120.8	6.64	708.33	1	4160257159.375	5531101581.25324	1530848450.95032	4160257159.375	5307995958.4375	1173116706.125
High	G1L7R2	0.000	494.463	58	43	461	42	643	72.6	5.16	1206.98	1	7125947517.75	11138786892.3394	14374650558.2054	7125947517.75	10689486522.3281	11015553305.7969
High	G1LPS1	0.000	494.304	56	54	189	54	1176	134.0	7.23	520.06	0	1108822928.875	1249735914.67161	1358856989.93498	1108822928.875	1199325864.25	1041316555.625
High	G1MAN4	0.000	493.525	65	33	483	33	555	60.7	6.93	1432.29	0	11120705417.9844	12117728828.9655	6114650873.8189	11120705417.9844	11628941306.6641	4685766959.97949
High	D2HLF0	0.000	491.533	73	37	535	36	549	60.5	7.17	1556.56	1	25775061537.7578	25102027149.2021	3770088476.65225	25775061537.7578	24089497670.4375	2889086619.11279
High	D2H9W8	0.000	489.299	79	44	491	43	541	59.6	5.82	1229.37	1	13504737552.5859	14487007434.4104	7568517699.0281	13504737552.5859	13902651358.3359	5799891261.49023
High	G1LGH6	0.000	489.294	70	46	233	46	905	102.1	5.27	669.78	0	2861997286.5625	3111664342.72073	4378033045.10455	2861997286.5625	2986150500.5	3354965478.125
High	D2HE42	0.000	489.180	33	35	199	35	1665	178.2	4.34	672.40	0	4778096562.125	4057027859.1081	6050179684.60214	4778096562.125	3893381302.63281	4636361527.92188
High	G1L729	0.000	489.165	60	49	227	49	1214	132.9	7.90	616.57	0	2114391153	2168304157.65195	743244184.685425	2114391153	2080842222.1875	569561388.8125
High	D2HK31	0.000	488.585	28	74	171	74	3348	378.1	5.12	403.41	0	623674932.40625	571766360.602709	621842077.652946	623674932.40625	548703271.25	476528770.3125
High	G1LPI9	0.000	488.201	67	34	360	34	671	73.7	7.39	1093.49	0	7712108178.85938	7735170297.75689	4799428992.9486	7712108178.85938	7423160120.125	3677888773.375
High	D2HT18	0.000	487.758	84	35	310	31	645	69.8	6.44	982.48	6	2790243681.67188	3550365283.12709	11407765698.2871	2790243681.67188	3407155753.14844	8741976066.875
High	G1LEQ8	0.000	487.377	49	47	276	47	1252	135.9	6.86	768.03	0	3361793546	3269036720.77618	4287934187.07599	3361793546	3137175017.84375	3285921102.44531
High	G1LIR3	0.000	487.002	57	60	305	59	1265	140.4	7.61	792.83	1	3901992070	3456531482.93844	3108698871.00856	3901992070	3317106885.875	2382251866.6875
High	D2HL68	0.000	486.220	68	44	560	1	686	76.8	8.03	1410.50	0	248089447.5	279161773.742818	258691051.745357	248089447.5	267901347.5	198239606.5
High	G1LYA2	0.000	484.577	36	68	183	67	2198	252.4	5.10	464.70	1	591196545.65625	572488673.34036	1566081934.33294	591196545.65625	549396448.375	1200116758.25
High	G1L1L3	0.000	483.873	45	73	271	1	1601	180.9	8.07	629.89	0		1061107.2953925	50923476.3755692		1018305.875	39023576
High	D2HUZ8	0.000	483.575	45	73	276	1	1599	180.7	8.07	630.99	68	2221786023.5625	3063382999.96175	2894372850.64817	2221786023.5625	2939816661.125	2218009981.8125
High	D2GXX0	0.000	482.716	68	32	659	32	508	57.5	8.28	1867.72	0	17999233466.3008	21324406487.0206	24842491301.9971	17999233466.3008	20464253238.9609	19037247971.8984
High	D2HRQ7	0.000	480.795	57	23	323	23	558	62.9	7.72	968.35	0	13827449612.0049	10388165226.8454	10489315039.4835	13827449612.0049	9969142354.3125	8038150805.1875
High	G1LNP3	0.000	480.167	67	40	494	40	673	75.7	5.57	1254.88	0	11976250566.1563	12935837968.3735	23858466781.0308	11976250566.1563	12414050735.9063	18283172280.0391
High	G1LI47	0.000	480.082	59	51	182	51	1214	134.3	5.33	488.10	0	1688685897.75	1941383481.86088	416149335.313558	1688685897.75	1863074746.34375	318902721.6875
High	G1LRJ2	0.000	479.194	53	41	418	40	821	90.7	5.92	1081.90	1	8207992368.92969	12822466263.301	16902988907.0656	8207992368.92969	12305252055.6641	12953064464.3594
High	D2H1P3	0.000	478.927	80	33	556	25	417	44.8	8.27	1545.45	10	18641966818.2578	16307735895.4034	7651587434.34487	18641966818.2578	15649937892.5625	5863549093.99023
High	D2HWC6	0.000	478.105	56	44	199	1	1250	137.0	6.71	595.14	0	75938896	63188377.9351742		75938896	60639576
High	G1MB13	0.000	477.742	54	41	455	41	805	88.1	7.78	1216.15	0	16622674278	16148978798.9429	10598497725.598	16622674278	15497584511.5938	8121819461.625
High	G1L081	0.000	477.733	87	35	271	26	447	50.5	5.14	841.51	0	3562230800	3419256931.94483	3717757028.07581	3562230800	3281335862.125	2848984088.6875
High	G1LGH1	0.000	477.642	78	38	577	38	624	67.7	6.81	1829.93	0	17735919026.6172	18526570538.6934	13865883197.0842	17735919026.6172	17779272374.3125	10625675724.8438
High	D2H3X0	0.000	476.760	44	55	194	55	1477	164.7	5.22	530.08	0	2875154746.375	1977152653.69051	1022250553.85066	2875154746.375	1897401112.75	783368988.5
High	G1MIV9	0.000	475.378	28	76	157	75	3528	401.4	5.82	384.45	1	492567563.5	513063440.100138	333965546.265055	492567563.5	492368224.75	255923805.75
High	D2HCL6	0.000	474.343	36	61	125	61	2199	245.5	7.02	345.83	0	358675915	317111277.315605	816379700.887496	358675915	304320098.5625	625606450.5
High	G1L294	0.000	473.349	63	31	261	31	773	85.2	5.86	879.05	0	4324515629.10938	4890684042.90101	4963157362.652	4324515629.10938	4693410661.9375	3803356768.35938
High	D2GZC4	0.000	472.844	38	69	165	61	2522	280.9	5.52	398.15	8	1014799687.11328	1138992143.94404	485211681.236742	1014799687.11328	1093049116.51563	371826439.71875
High	D2HK96	0.000	472.758	48	55	158	52	1694	184.9	7.18	472.08	2	555497145.03125	1431969716.72693	642006412.221464	555497145.03125	1374208981.21875	491981062.625
High	D2HTE5	0.000	472.258	48	66	194	61	1527	175.4	6.15	499.83	1	1464985662.0625	758908221.275867	3233291570.71687	1464985662.0625	728296472.625	2477729493.75
High	D2GZ42	0.000	470.556	74	29	1226	15	377	42.0	5.39	3073.60	0	19807409892.0762	23369492286.431	12628172794.623	19807409892.0762	22426847307.875	9677195978.48438
High	D2HEH8	0.000	470.182	35	71	126	22	3036	339.6	6.37	319.97	34	577183101.5625	670664927.807559	192702206.889097	577183101.5625	643612610.25	147671167.625
High	G1M012	0.000	469.369	42	36	524	34	1460	138.6	5.94	1418.84	2	18507748436.3638	22498777253.0476	57984552993.5424	18507748436.3638	21591253925.5703	44434606032.8101
High	G1LBB6	0.000	469.301	34	58	174	56	1874	216.4	6.28	431.99	1	1188766983.4375	1191056518.43193	1964775615.86426	1188766983.4375	1143013393.125	1505642898.4375
High	D2HDJ4	0.000	468.109	64	47	179	47	1023	116.3	5.58	462.78	0	2604978049.5	2023004429.44391	298315028.759963	2604978049.5	1941403385.5	228604172.875
High	D2GXF6	0.000	466.448	76	39	369	39	586	64.0	6.95	1125.30	0	7766229158.17578	5070299778.79275	5449967771.34555	7766229158.17578	4865781316.53125	4176408341.6875
High	G1LDV1	0.000	465.544	67	34	403	34	459	51.4	5.49	998.38	0	8767901802.03125	12165293709.0074	6700767311.17298	8767901802.03125	11674587582.9648	5134918529.46875
High	G1M575	0.000	465.215	65	49	296	49	971	110.3	5.77	834.17	0	6088759154.0625	6308902070.87325	3462817532.73156	6088759154.0625	6054422650.25	2653619367.34375
High	D2H633	0.000	464.748	46	54	173	54	1506	168.0	6.79	418.24	0	930432764.140625	1084276077.70184	1390426035.32847	930432764.140625	1040540108.28125	1065508483
High	G1LSC4	0.000	463.759	43	57	177	57	1801	203.4	6.44	473.02	0	1045488592.375	1135789601.3708	771465876.760954	1045488592.375	1089975753.5	591188179.125
High	G1M509	0.000	461.608	52	24	290	24	787	85.4	4.39	1102.10	0	7049936043.375	6570428541.29471	5037073330.6084	7049936043.375	6305400041.9375	3859999904.26563
High	G1LN83	0.000	461.595	24	75	169	75	4847	528.9	6.09	397.63	0	381836716.59375	400576348.342323	650260837.601672	381836716.59375	384418475.5625	498306577.28125
High	G1L9E3	0.000	460.222	65	38	198	35	790	86.5	7.31	651.47	4	2984110881.67969	3466598743.42965	1683397394.14204	2984110881.67969	3326768067.6875	1290017705.46875
High	G1LWK1	0.000	459.006	38	69	152	57	2391	270.5	6.21	402.30	0	424408819.875	372237484.824638	136145418.867782	424408819.875	357222704.375	104330683.574219
High	D2HY31	0.000	458.942	31	65	91	65	3173	351.4	5.06	264.06	0	145908405.375	161152446.750119	1036292172.22181	145908405.375	154652111.0625	794129333.25
High	G1LQU3	0.000	458.657	74	45	224	2	738	82.1	6.84	639.16	0	70511992	65033060.5918439	17507440.0518861	70511992	62409850.5	13416266.25
High	G1LZL8	0.000	458.485	37	56	191	55	1887	209.8	6.96	481.23	1	2641851559	2772568440.52948	850888051.975199	2641851559	2660732561.25	652050820.703125
High	G1MH51	0.000	457.681	49	54	182	51	1538	176.0	5.57	487.11	0	760337596.6875	1146103338.57268	1898167146.62305	760337596.6875	1099873470	1454599630.25
High	D2H120	0.000	457.618	63	29	254	29	673	73.6	6.02	928.16	0	4733383069.25	6547455572.98814	4764549025.80272	4733383069.25	6283353724.19531	3651159627.10156
High	G1M3G9	0.000	457.302	95	17	1110	3	261	28.6	4.96	4200.24	0	2665276073.21875	4253994176.09772	5955460224.08698	2665276073.21875	4082402675.53125	4563776301.4375
High	D2I7G9	0.000	456.730	60	40	580	27	641	70.3	6.29	1491.14	10	5452921535.83984	5067204393.69297	2525398149.97441	5452921535.83984	4862810788.625	1935258031.26563
High	G1LS57	0.000	453.338	38	56	185	54	2171	230.0	9.55	500.24	1	914329559	833342016.822691	538785673.290365	914329559	799727864.75	412881153.5625
High	D2H4K0	0.000	452.791	73	45	230	2	745	82.7	7.08	654.15	32	2490432718.13281	3291076265.00341	2296987610.46134	2490432718.13281	3158325562.625	1760222926
High	D2GV28	0.000	452.714	55	54	145	54	1359	144.4	9.99	383.15	0	1851133183.9375	1410995480.2586	572643199.070689	1851133183.9375	1354080773.34375	438826784.625
High	G1MEP7	0.000	452.288	62	32	193	32	639	71.1	5.25	611.03	0	4077121133.39844	4409419266.84803	1699332111.54637	4077121133.39844	4231558452.44531	1302228766.0625
High	G1LWZ3	0.000	452.115	44	34	162	34	1066	122.1	5.67	474.43	0	1892929162.5	1871225452.86552	2421423018.00862	1892929162.5	1795746651.04688	1855580017.25
High	G1LE07	0.000	451.236	61	44	188	44	968	106.7	5.53	542.65	0	3208864914.875	3176417803.79161	2939701447.76013	3208864914.875	3048292029.5625	2252746101.1875
High	G1L7F1	0.000	450.980	44	57	162	53	1886	206.8	6.11	423.16	4	963854045.75	465684348.097383	940086278.078913	963854045.75	446900242.4375	720405025.9375
High	G1M9Y5	0.000	445.966	64	42	196	2	874	97.7	5.41	557.80	37	2271696322.28125	2582015802.68642	3715519132.4339	2271696322.28125	2477866161.73047	2847269149
High	G1LEE5	0.000	445.860	60	43	535	43	730	77.8	8.56	1348.32	0	13070453608.4375	11589079809.0222	11062635270.6105	13070453608.4375	11121616170.7813	8477496411.65625
High	D2H3C0	0.000	445.223	52	41	225	41	1099	116.6	9.96	644.52	0	4563692568.0625	6289152295.51929	1060322538.6377	4563692568.0625	6035469512.9375	812544235.3125
High	D2HGI1	0.000	444.811	67	44	202	44	984	110.8	6.51	529.19	0	2359080056.09375	2229329040.24786	1069017297.90824	2359080056.09375	2139405570.8125	819207185.75
High	G1MF49	0.000	444.428	63	26	364	26	420	46.6	8.79	1098.78	0	2015819834.9375	2941643255.56813	31874681797.8077	2015819834.9375	2822987479.5	24426142049.668
High	D2HK71	0.000	444.296	53	41	174	41	965	107.6	6.18	490.43	0	782043445.375	923174473.743921	2582598944.63303	782043445.375	885936789.1875	1979092029.1875
High	D2GW54	0.000	443.483	38	48	122	48	1977	213.9	4.68	407.17	0	375511620.75	395650835.460743	872391493.806422	375511620.75	379691640.9375	668529295
High	G1M5C2	0.000	443.170	62	47	299	37	976	107.5	7.52	719.95	10	2978966257.875	3234629394.00049	3815098079.0419	2978966257.875	3104155564.34375	2923578287.09375
High	G1M8K0	0.000	442.943	31	64	156	2	2795	308.6	5.91	406.68	50	418253109	475614423.90508	437524462.367745	418253109	456429773.125	335282866.0625
High	G1LJ93	0.000	442.931	42	55	168	55	1411	162.0	5.77	492.94	0	1837529245.875	1950849581.69148	1716727562.43221	1837529245.875	1872159016.25	1315559213
High	G1LST9	0.000	442.344	34	62	142	62	2544	288.0	7.18	370.17	0	360918017.25	350829836.252018	555016286.422133	360918017.25	336678566.75	425318964.375
High	G1M1B2	0.000	442.099	75	46	257	46	706	76.9	7.53	743.15	0	1685807768	1401003739.91228	13460085244.6214	1685807768	1344492065.45313	10314705454.0439
High	G1LX53	0.000	441.462	30	51	137	36	2630	278.0	5.82	414.78	13	1110182852.375	1050783040.89665	532543515.570243	1110182852.375	1008398065.4375	408097675.8125
High	D2I2P4	0.000	440.220	53	43	179	38	1086	123.6	6.33	500.38	5	2157343140.625	1453327937.71705	1467763391.18387	2157343140.625	1394705685	1124773490
High	G1LL61	0.000	439.826	44	49	207	49	1330	148.3	9.28	543.38	0	1518720133.125	2212724987.30267	3211547013.79919	1518720133.125	2123471268.28125	2461066248.625
High	G1MIB8	0.000	439.075	54	42	322	42	544	62.5	6.93	714.63	0	12819359725	11456454526.343	6759694686.17739	12819359725	10994340536.0625	5180075636.96875
High	D2GW53	0.000	438.864	28	52	161	50	3034	328.4	4.86	396.36	0	718629395.625	774737535.584113	497900230.39071	718629395.625	743487286.8125	381549903.1875
High	G1L2Q2	0.000	436.817	39	52	162	52	1682	189.3	6.39	426.36	0	1746792556.375	1258805122.00455	585376245.296039	1746792556.375	1208029250.9375	448584347
High	G1MHX3	0.000	435.637	41	58	156	58	1877	209.5	8.91	374.10	0	518191747.75	847847257.359432	990775821.866947	518191747.75	813648013.75	759249335.1875
High	G1M3B4	0.000	434.276	46	60	181	1	1600	179.5	6.09	441.32	0	17583058	2925824.71033484	25839046.3081957	17583058	2807807	19800926
High	D2HQX7	0.000	433.916	63	23	1487	1	429	48.5	4.91	3796.96	0	1257790237	1319271139.59492	31755424.7778748	1257790237	1266056277.25	24334753.25
High	D2HQ13	0.000	433.200	56	41	165	41	940	102.7	7.09	458.75	0	1288198923.9375	1731313386.94806	1308419209.1263	1288198923.9375	1661478156.875	1002665176.875
High	G1LLX4	0.000	433.150	57	30	392	30	772	83.4	5.95	1225.60	0	5827432175.85938	6676800079.39208	4189410285.24164	5827432175.85938	6407480917.875	3210420464.14063
High	G1MEZ7	0.000	432.523	23	83	140	81	4416	506.1	6.25	271.44	0	546572901	307356945.673365	220953553.67433	546572901	294959223.125	169320682.875
High	D2HYB5	0.000	432.470	78	30	164	29	625	67.6	6.02	549.30	0	6467859368.40625	6010431687.15233	121345226.516642	6467859368.40625	5767991535.71875	92989029.9375
High	G1MDY5	0.000	429.493	63	37	145	15	812	89.6	5.50	486.09	24	1316292788.54688	1252876091.80946	2928362388.94024	1316292788.54688	1202339377.4375	2244056776.4375
High	G1MB71	0.000	428.721	43	55	182	53	1218	141.6	7.18	480.63	2	1450886061.51172	1667033513.78527	2039897460.51085	1450886061.51172	1599791112.8125	1563210119.34375
High	G1LWU9	0.000	428.353	33	44	167	44	1799	195.4	6.10	490.19	0	866437369.875	1094812033.66328	1086044558.21703	866437369.875	1050651080	832255481.625
High	G1L3I1	0.000	427.897	49	45	211	45	1114	127.8	6.60	559.90	0	2639623078.32813	3046751450.57911	3215067111.17999	2639623078.32813	2923855971.26807	2463763762.57031
High	G1MJG9	0.000	427.553	35	48	182	47	2086	213.6	6.90	495.94	1	3035285495.34375	1162123611.95082	1667681128.64337	3035285495.34375	1115247540.625	1277974048.5
High	G1L707	0.000	426.662	56	46	164	46	1337	143.9	5.69	535.89	0	735504187.5625	706121768.328426	2157239863.60629	735504187.5625	677639243.71875	1653131713.6875
High	G1MBX3	0.000	425.917	54	38	242	3	824	92.2	6.90	612.24	33	3628364511.6875	2949492710.43618	4162650511.06536	3628364511.6875	2830520314.34375	3189913967.8125
High	G1LHS6	0.000	425.801	45	37	142	37	1283	137.0	6.49	415.61	0	2097852974.375	1086031107.15004	409716261.172793	2097852974.375	1042224345.875	313972941.25
High	G1MHF6	0.000	425.589	78	40	219	28	554	62.2	6.81	591.29	11	2875884487.375	2820487110.95847	1673758872.07747	2875884487.375	2706718357.25	1282631532.625
High	G1M7I8	0.000	425.383	51	39	219	39	943	105.6	5.00	626.38	0	5946703041.90625	5301686281.48515	2583794078.80169	5946703041.90625	5087834483.17188	1980007882
High	G1LDP5	0.000	424.927	57	43	311	43	966	107.9	7.61	808.57	0	4561305279.94922	6060238212.79555	4029902405.90213	4561305279.94922	5815789037.34375	3088186706.84375
High	G1M9L3	0.000	424.248	47	29	560	26	692	74.5	8.31	1802.07	3	14325029804.875	9998150235.47589	15112508209.9858	14325029804.875	9594859226.89063	11580986897.5469
High	D2GXW0	0.000	423.906	43	58	195	57	1861	206.6	5.82	452.10	0	979093270.34375	1438318082.50925	687066196.561822	979093270.34375	1380301275.75	526511185.9375
High	D2HF47	0.000	422.895	57	37	241	2	769	86.6	7.36	606.68	0	207250340	141645358.822623	154998158.378662	207250340	135931872	118777877
High	D2H4S8	0.000	422.640	64	52	227	39	846	97.4	7.47	573.97	1	1774808396	751105643.617024	504984638.867912	1774808396	720808624.125	386978812.84375
High	G1L717	0.000	422.442	54	40	238	40	913	100.7	6.68	580.64	0	4217559611.33398	4580560564.46303	2806299002.57282	4217559611.33398	4395796498.46875	2150517407.6875
High	D2HJX1	0.000	422.293	30	63	154	1	2785	307.6	5.90	396.04	0		8728383.48303042	10460335.157096		8376310.5	8015943
High	G1MAY1	0.000	421.283	29	63	119	62	3024	337.3	6.39	298.73	0	583055252.125	470872856.436591	593454860.337765	583055252.125	451879464.1875	454775135.03125
High	D2HIC5	0.000	421.082	39	66	143	66	2202	250.8	6.80	361.07	0	486335472.8125	638817257.622847	429688293.35066	486335472.8125	613049565.59375	329277868.78125
High	G1M3D1	0.000	420.145	54	59	189	59	1218	136.1	8.73	438.15	0	1810343366.0625	1596807477.98872	975155405.816313	1810343366.0625	1532397753.875	747279129.375
High	D2HRE3	0.000	419.943	31	39	187	38	1349	146.1	8.68	511.11	1	1916643679.375	2004484038.80546	7075214421.4509	1916643679.375	1923630043.75	5421864085.9375
High	D2H629	0.000	419.663	26	86	147	13	3976	455.6	5.90	306.20	54	542774523	414186640.227123	164549175.442404	542774523	397479775.0625	126096993.1875
High	D2H546	0.000	419.592	64	45	236	45	833	93.7	5.49	615.01	0	3051562024.875	2945189955.89122	3737020716.53845	3051562024.875	2826391118.125	2863746199.6875
High	D2H485	0.000	418.276	65	33	184	30	765	86.1	7.08	569.93	3	1841423702.375	1959357733.86303	2617505131.68938	1841423702.375	1880323978.8125	2005841268.25
High	D2H9M5	0.000	418.216	32	70	150	68	2610	289.0	5.35	358.81	2	590659287.375	445062943.074072	535403497.939789	590659287.375	427110634	410289331.75
High	G1MCD1	0.000	418.182	79	33	457	23	528	57.5	6.95	1379.62	10	11089797237.2031	12485323857.8754	5303406401.28524	11089797237.2031	11981708815.8359	4064095727.34375
High	D2H6C2	0.000	417.407	41	51	162	49	1841	204.8	5.99	456.27	1	955169662.4375	609520416.81332	1057215616.02564	955169662.4375	584934458.625	810163344.625
High	G1LB18	0.000	417.161	75	30	1034	24	434	47.2	7.08	3297.10	5	28978649462.6382	19678324932.639	37974929158.7462	28978649462.6382	18884568955.5391	29100871338.625
High	D2HSD2	0.000	415.903	25	78	151	76	3868	448.0	4.94	301.31	1	304248938.5	349582542.002473	411507215.6395	304248938.5	335481584.0625	315345381.875
High	G1LH91	0.000	414.925	52	34	197	4	747	82.8	6.52	611.87	27	3385352508.71875	3198103632.76788	1891522285.97215	3385352508.71875	3069103126.75	1449507554
High	G1LQW8	0.000	414.585	47	37	114	34	1089	116.9	6.24	377.04	3	792878101.4375	525794516.583224	195130459.621175	792878101.4375	504585773.375	149531981.375
High	G1LV80	0.000	413.799	48	61	179	58	1508	173.1	6.47	402.16	3	1233160536.1875	1326896722.19403	424833964.40627	1233160536.1875	1273374270.0625	325557909.1875
High	D2H7C7	0.000	412.875	67	41	189	1	844	94.3	5.40	530.61	0			18107513.0721036			13876113
High	D2I242	0.000	412.339	22	83	157	82	4814	524.2	6.28	324.28	1	418077153.625	1672002066.43045	3043753211.079	418077153.625	1604559251.125	2332482839.1875
High	G1LDR5	0.000	412.111	37	55	161	55	1726	198.9	4.91	424.46	0	750693755.445313	765538548.442343	1246440392.00715	750693755.445313	734659355.1875	955169694.390625
High	D2HXW5	0.000	412.090	52	36	176	35	863	96.9	6.65	499.27	1	1187465329.875	1489622329.26056	2136181717.31223	1187465329.875	1429536085.5625	1636994477.37109
High	G1L1V3	0.000	410.443	41	41	182	22	1249	138.5	6.86	522.60	19	1553799232.00781	1836192984.02364	1642956393.98511	1553799232.00781	1762127271.5625	1259027039.5625
High	G1LR91	0.000	409.942	42	55	130	55	1593	182.9	5.38	327.09	0	1241855274.625	923254853.225893	222730758.708486	1241855274.625	886013926.4375	170682587.0625
High	G1LWT5	0.000	409.643	61	37	330	37	684	77.3	5.58	896.12	0	2560832005.65625	3364496779.18533	9005975193.11186	2560832005.65625	3228784545.67188	6901440797.375
High	D2I1B3	0.000	408.639	37	57	138	56	1978	227.1	5.35	340.97	0	734957670.75	456076440.185027	453056780.851854	734957670.75	437679884.5	347185561.125
High	G1M9N6	0.000	408.600	60	32	437	32	606	68.6	6.92	1352.83	0	12129486982.7969	15140866138.0119	11866135253.0502	12129486982.7969	14530135649.6875	9093232902.21875
High	G1MBM9	0.000	408.351	28	66	128	66	3111	357.1	5.10	296.35	0	675280150.1875	2532395341.77433	1549514452.43714	675280150.1875	2430247219.625	1187420798.84375
High	G1M9V8	0.000	408.094	56	48	204	47	999	112.3	6.39	542.13	1	1669526280.375	1940188729.37157	4288106330.60076	1669526280.375	1861928186.0625	3286053019.125
High	G1MIQ4	0.000	408.011	36	57	147	51	1715	194.0	6.49	385.05	5	424290375.125	555954772.626248	955786597.480236	424290375.125	533529468.375	732436463.125
High	G1LA28	0.000	407.668	79	36	384	35	539	58.0	7.83	1085.92	0	10249297155.875	10157731001.3508	5306713703.07946	10249297155.875	9748003053.28125	4066630172.20313
High	G1LNI3	0.000	407.373	54	51	233	50	1063	121.7	9.38	630.52	0	2150339327.5	3784979128.5261	2258703279.50747	2150339327.5	3632306082.58594	1730884954.5
High	G1LX55	0.000	406.704	44	43	158	42	1039	116.4	5.45	477.07	1	2033828907.625	1508650388.17968	608081748.923489	2033828907.625	1447796618	465983982.875
High	D2I3B4	0.000	406.155	69	34	260	34	557	63.7	7.61	687.14	0	7747958248.8125	7575649062.50191	2028035358.1915	7747958248.8125	7270073423.09375	1554119976.95117
High	G1LWF3	0.000	404.478	53	32	228	27	768	84.0	8.12	676.20	0	3811946673.125	2595153686.39394	3506118611.94603	3811946673.125	2490474108.375	2686801763.28125
High	G1LGY3	0.000	404.000	59	51	229	2	835	94.7	5.81	546.26	0	82995137.5	107726337.224076	65178306.3343157	82995137.5	103381027.125	49947308.625
High	G1LNX9	0.000	402.942	33	52	109	52	2313	249.2	5.38	294.35	0	168442465.25	297329329.256575	792611848.6993	168442465.25	285336086.28125	607392717.8125
High	G1MGA6	0.000	402.364	40	36	150	36	1635	175.5	6.32	441.56	0	858580497.180664	1162762314.64682	1132662068.37593	858580497.180664	1115860480.25	867979318.253906
High	G1MEK3	0.000	402.330	67	43	133	43	723	79.5	8.53	384.85	0	1425974264.125	1133515795.02736	579102711.730184	1425974264.125	1087793664.6875	443776825.375
High	D2HWB6	0.000	401.462	53	44	182	44	1218	133.4	5.94	485.15	0	1111180522.78125	1236961469.17538	1363573720.28089	1111180522.78125	1187066695.96875	1044931070.9375
High	G1MIR6	0.000	401.031	34	42	122	40	1593	175.7	7.11	337.99	2	874063001.339844	701242352.564863	423707856.943263	874063001.339844	672956646.8125	324694952.78125
High	G1LXH5	0.000	401.002	61	39	221	39	719	81.4	6.46	599.62	0	1488056262	2091614280.98631	2640467212.11763	1488056262	2007245751.5	2023437523.54297
High	G1M7L4	0.000	400.944	68	38	386	38	577	63.3	6.76	995.69	0	16421278885.1953	18024867339.175	8968288244.47079	16421278885.1953	17297806157.0938	6872560610.6875
High	G1M6Y7	0.000	400.591	44	50	155	50	1721	180.1	4.87	418.02	0	423306126.21875	486678465.298632	1488876210.39499	423306126.21875	467047529.125	1140952623.15625
High	D2H814	0.000	400.502	72	33	188	31	543	61.2	6.46	513.28	1	3581592812.77344	2984072347.39347	1098748006.90542	3581592812.77344	2863705127.625	841990362.875
High	D2HFU3	0.000	400.235	42	40	106	1	1543	169.5	5.78	314.07	0	29178874	32424784.3290241		29178874	31116880
High	G1LTK1	0.000	399.727	42	44	140	44	1416	158.0	6.15	406.45	0	624896872.375	696691852.537596	1108870929.81081	624896872.375	668589698.3125	849747740.796875
High	D2HB42	0.000	399.143	61	47	149	47	1128	125.6	6.21	393.79	0	1106406585.125	964517374.414729	483858154.433733	1106406585.125	925612059.375	370789207.78125
High	G1LHD9	0.000	398.934	65	26	729	21	353	37.4	9.07	1831.10	5	24330434948.4844	24464651022.5758	31693365986.1022	24330434948.4844	23477831105.5703	24287196481.5
High	G1LB74	0.000	398.584	64	42	239	39	935	101.1	6.81	635.15	3	2717915836.15625	2354561871.57214	5174173025.2903	2717915836.15625	2259586940.25	3965061866.5625
High	G1MI56	0.000	398.506	21	40	175	40	2727	296.4	12.04	498.20	0	3317591573	3435678808.74955	2759701914.01648	3317591573	3297095336.875	2114809220.5
High	D2GVZ4	0.000	398.504	50	51	147	1	1347	149.2	7.90	393.27	0	50338351	53124053.694723	1659807.04949084	50338351	50981212	1271940
High	G1MCY2	0.000	398.494	40	42	139	41	1529	165.8	7.62	382.66	0	631518306.25	1251248466.43484	714798057.140537	631518306.25	1200777404.875	547762609.5625
High	G1L2A6	0.000	398.353	42	40	105	1	1532	168.5	5.74	311.16	35	804955280.125	741031036.735168	204593309.222472	804955280.125	711140392.25	156783533.25
High	G1KZT0	0.000	398.157	58	42	124	42	1046	114.9	6.46	375.26	0	557997860.558594	727193221.333901	584144884.651682	557997860.558594	697860746.75	447640733.1875
High	G1M5L6	0.000	396.519	53	34	179	31	853	93.4	8.07	486.07	3	2234835641.8125	1923940994.57555	1897777058.3968	2234835641.8125	1846335829.03125	1454300698.625
High	G1MB69	0.000	395.483	69	37	271	37	737	80.0	7.37	733.79	0	10063028292	10309651916.1835	1859541628.85435	10063028292	9893796000.6875	1425000201.15625
High	D2HG52	0.000	395.184	50	34	135	34	1024	112.0	4.98	449.56	0	2114750256.6875	1381898141.35771	298973888.407478	2114750256.6875	1326157121.0625	229109068.875
High	G1M6Q1	0.000	394.922	36	54	145	54	1849	207.0	6.54	381.22	0	779805290.1875	845129242.809033	424296820.712655	779805290.1875	811039634.5625	325146286.3125
High	G1M8L8	0.000	394.725	37	41	101	41	1824	199.2	4.45	308.21	0	87002910.8125	181383083.395457	2098392827.23205	87002910.8125	174066713.375	1608036171.125
High	G1MGF0	0.000	393.736	67	26	1082	9	456	50.7	5.06	3220.20	0	1582677538.84375	1195608414.52155	60808521.0606549	1582677538.84375	1147381681.375	46598663.5625
High	G1MBN5	0.000	392.572	56	48	192	1	950	110.2	7.33	466.23	0	31693002	42787421.4870207	21938746.3757998	31693002	41061524	16812056
High	G1LD12	0.000	392.374	47	46	122	46	1243	142.3	6.15	341.36	0	695983214.125	921635109.260218	148669969.262681	695983214.125	884459517.375	113928471.84375
High	G1LES1	0.000	391.929	72	31	155	31	643	72.7	6.51	512.01	0	2164801790.5625	2316646968.67151	1442345777.79218	2164801790.5625	2223201394.1875	1105295515.625
High	G1MHV9	0.000	391.351	69	33	233	33	683	74.5	6.80	704.38	0	1708999763.1875	1804915633.68232	6791077664.40135	1708999763.1875	1732111542.00781	5204124977.72461
High	G1M8T8	0.000	391.101	35	57	142	52	2128	241.2	6.73	348.93	5	1027746762.9375	907436505.522798	872203592.207999	1027746762.9375	870833636.5	668385302.625
High	G1MBN4	0.000	391.075	52	48	191	1	1015	117.6	7.56	457.90	39	2716209930.125	2980339431.54176	1339919142.95217	2716209930.125	2860122784.76563	1026804142.8125
High	D2GVG8	0.000	390.864	71	39	146	2	706	78.8	7.21	389.50	0	18097579.25	14495940.1407386	1455933.13255465	18097579.25	13911223.75	1115707.75
High	D2GUB6	0.000	390.380	45	49	146	48	1362	152.2	6.46	385.84	1	769006555	944171577.018086	1105274271.71708	769006555	906086941.5	846991557
High	D2HMT7	0.000	390.317	41	32	156	31	857	95.8	6.77	469.97	0	1906515074.75	2294273984.98662	2566694488.85845	1906515074.75	2201730859.75	1966904158.625
High	D2H056	0.000	389.659	48	46	186	1	1093	124.6	6.28	459.83	0
High	G1M870	0.000	389.238	53	45	90	45	1412	157.2	6.79	261.17	0	122258300.875	60510334.0385362	1527448035.53791	122258300.875	58069555.1875	1170510906.625
High	G1L5J8	0.000	388.967	42	43	171	30	1269	141.4	7.40	474.22	12	2127017258.4375	2473133855.19915	1722408856.17351	2127017258.4375	2373376137.6875	1319912890.59375
High	G1LTU8	0.000	388.698	42	57	285	57	1352	163.1	6.74	653.43	0	4319735149.5625	5054005258.25839	3953146209.69617	4319735149.5625	4850144060.9375	3029367052.9375
High	G1LLE2	0.000	388.406	36	59	151	52	1871	217.3	8.57	336.29	5	470480361.0625	637379132.63616	481572366.507835	470480361.0625	611669449.625	369037567.375
High	G1ME21	0.000	388.390	45	38	124	3	1268	136.9	5.15	362.52	32	1365781254.875	901475762.386693	239227514.375695	1365781254.875	865113329.25	183324347.6875
High	D2GVA1	0.000	388.246	39	47	168	2	1586	172.5	6.84	443.07	0
High	G1M5Z6	0.000	387.946	65	42	235	40	729	79.5	6.20	598.55	2	5423077159.1875	5805173613.31427	627930728.602099	5423077159.1875	5571012866.9375	481194613.0625
High	G1M9L8	0.000	387.701	49	51	143	1	1396	154.6	7.99	387.10	46	1256046730.6875	1558488890.00724	507416321.80134	1256046730.6875	1495624806	388842255.21875
High	G1M6X1	0.000	387.508	57	40	402	40	642	71.7	6.76	1172.72	0	10950907968.125	9927203557.95395	16131719342.6779	10950907968.125	9526774294.4375	12362026722.9375
High	D2HEF1	0.000	387.417	44	37	208	34	1096	118.4	6.84	606.12	1	1832825689.25	1997856032.50473	927510682.075612	1832825689.25	1917269388.4375	710768120.5
High	G1MBG0	0.000	386.674	31	45	116	45	1978	220.0	6.64	287.98	0	947222322.0625	620703784.025161	579146351.903699	947222322.0625	595666727.25	443810267.625
High	G1LAD6	0.000	386.376	46	46	189	1	1096	124.8	6.21	456.27	42	1611967842.375	1867341786.44148	1763487537.02518	1611967842.375	1792019638.375	1351392222.6875
High	G1M153	0.000	385.980	72	34	155	30	522	56.3	6.29	411.93	4	2041496784.21875	2107779290.00251	1064419992.93643	2041496784.21875	2022758719.625	815684188.25
High	D2HEW0	0.000	385.518	62	38	193	38	775	87.7	6.83	500.65	0	2304414996	2038005834.58637	1096527896.43096	2304414996	1955799685.53125	840289052.28125
High	D2HBJ3	0.000	385.407	55	29	195	29	611	69.3	6.49	543.25	0	3052445287.1875	3154775039.78309	3382877112.77894	3052445287.1875	3027522260.25	2592359585.5
High	G1LS66	0.000	385.279	77	25	206	1	397	41.9	7.91	665.75	26	4468342869.71875	2706304142.1799	3602351922.32474	4468342869.71875	2597141136.89063	2760547080.14844
High	D2H429	0.000	385.015	33	48	130	31	1849	208.8	5.91	348.73	0	199199333.875	223997584.623709	191904923.960977	199199333.875	214962292.125	147060195.375
High	G1M5U2	0.000	384.764	64	22	242	22	509	54.1	7.68	783.67	0	4198404239.625	4688891209.13779	2267325086.97201	4198404239.625	4499757457.35938	1737492000.65625
High	G1LMG5	0.000	384.674	48	36	208	36	795	89.1	5.29	546.80	0	1961588702.30469	2484264514.6746	3130044691.28301	1961588702.30469	2384057824.625	2398609552.75
High	D2GTZ2	0.000	384.067	78	29	318	29	401	44.7	8.91	908.81	0	9694372562.29297	11514611569.2383	5451541497.04439	9694372562.29297	11050151723.7813	4177614316
High	G1M3U3	0.000	383.329	33	40	135	40	1219	138.4	5.49	402.44	0	2711852423.5	1015733425.14161	1248423552.97171	2711852423.5	974762230.6875	956689426.3125
High	D2H105	0.000	382.973	44	46	117	46	1495	166.7	6.73	317.29	0	625313430.46875	633609804.914152	234914912.853609	625313430.46875	608052163.625	180019523.5625
High	G1LIC1	0.000	382.840	60	40	189	36	829	93.8	6.52	596.63	1	1644422053.3125	538217724.552615	182614602.281415	1644422053.3125	516507871.84375	139940854.75
High	D2HEW1	0.000	382.468	64	26	133	26	514	55.8	7.08	431.35	0	1446171232.4375	1527140209.37696	2085832374.66485	1446171232.4375	1465540623.375	1598410870.375
High	G1LS05	0.000	382.308	46	42	171	24	1070	122.5	7.96	420.89	13	1164446236.64063	1229131656.28466	1634477495.33302	1164446236.64063	1179552710.8125	1252529507
High	G1M7B7	0.000	382.131	48	38	169	38	1170	128.6	6.09	502.40	0	988750080.125	806255771.426232	1337669893.58684	988750080.125	773734185.375	1025080502.5625
High	G1MD28	0.000	381.734	35	42	145	42	2085	212.3	7.46	437.96	0	852683889.25	1000389749.74372	786141008.537546	852683889.25	960037466.40625	602433996.59375
High	D2HHC6	0.000	381.668	48	43	139	43	1156	128.8	5.06	368.67	0	960711221.0625	1231665805.20254	803939410.578452	960711221.0625	1181984640.875	616073232.25
High	D2HY86	0.000	381.155	86	25	210	1	365	38.8	7.46	668.86	0	216202180	228696499.834243	382897974.835073	216202180	219471669.25	293421606
High	G1MFI2	0.000	381.038	36	45	198	41	1630	179.0	5.33	483.29	4	2568897273.5625	2495690443.74806	2196490236.41327	2568897273.5625	2395022871	1683209980.4375
High	G1LE91	0.000	380.997	46	41	110	41	1039	120.7	4.96	306.95	0	1447716232.25	868183895.946169	238080281.666399	1447716232.25	833164342.25	182445202.625
High	G1LE45	0.000	380.709	58	52	209	51	1098	123.5	7.39	478.18	1	1908820695.625	1855215400.53493	799078486.216007	1908820695.625	1780382389.1875	612348218.46875
High	G1LPC1	0.000	380.081	45	41	131	41	1087	121.0	5.06	404.67	0	1298555116.125	943094813.322326	807823126.337978	1298555116.125	905053610.75	619049393.5
High	G1L1N5	0.000	379.631	52	51	134	51	1476	153.0	8.76	351.10	0	732429322.125	651768415.592759	1206629755.35162	732429322.125	625478318.375	924662087.375
High	D2HCK7	0.000	379.603	65	37	153	37	687	78.6	6.70	436.34	0	1170002361.6875	1286154891.20142	2279751460.77524	1170002361.6875	1234275824.46875	1747014554.4375
High	G1L3G9	0.000	378.776	56	47	192	47	1167	130.1	6.83	520.46	0	1798469619	1615895150.32047	1558214371.73108	1798469619	1550715495.125	1194087703.5
High	G1M2Q7	0.000	378.460	37	47	169	2	1652	179.4	6.74	436.84	39	1072518553	808816250.343261	1129991146.10214	1072518553	776191383.375	865932542.46875
High	G1LN04	0.000	378.163	42	40	154	1	1225	135.0	5.49	448.41	34	1248965360.04688	1093531836.24424	867811905.94122	1248965360.04688	1049422521.34375	665019874.4375
High	G1LE70	0.000	378.149	72	34	148	34	612	68.9	5.55	391.98	0	115405792.5	238006934.999907	9530931352.31224	115405792.5	228406553.46875	7303724145.51367
High	G1LWQ6	0.000	377.300	54	28	288	28	613	70.1	4.68	1031.12	0	7797842828.125	8251540430.63198	120894450.200493	7797842828.125	7918701657.03125	92643591.9375
High	G1LYX2	0.000	376.808	55	43	231	43	791	91.4	8.70	590.56	0	5436635104.4375	4429067420.82467	1288474576.95403	5436635104.4375	4250414067.4375	987381246.460938
High	D2GXJ6	0.000	376.605	56	46	153	46	1057	118.4	6.24	427.21	0	1244528135.25	947688196.726987	450403175.195117	1244528135.25	909461712.859375	345152055.375
High	D2HLD4	0.000	376.295	43	36	112	1	1265	136.8	5.21	338.46	0	10734617	9885094.73850264		10734617	9486364
High	G1LX58	0.000	376.104	63	35	178	35	787	86.7	5.41	531.42	0	2496332655.71875	2622645195.81023	876290806.061364	2496332655.71875	2516856704.8125	671517408.125
High	G1LKK0	0.000	376.023	69	40	261	40	660	75.3	6.89	653.50	0	4151306668.21875	3507887683.7765	2888316016.08478	4151306668.21875	3366391554.125	2213368520.53125
High	G1LVH9	0.000	375.788	73	30	234	25	518	56.6	6.05	653.62	1	1148407644.90625	969744181.206864	5552522671.17093	1148407644.90625	930628034.75	4254998006.26563
High	G1LTS3	0.000	375.533	43	43	120	43	1438	161.1	6.79	342.91	0	463902424.375	572441017.570433	406888874.279752	463902424.375	549350714.875	311806263.8125
High	D6BQW4	0.000	375.437	73	18	754	6	333	35.8	8.12	2637.63	18	20820818906.2813	16963951237.391	25335491803.5311	20820818906.2813	16279683763.6094	19415043124.7227
High	G1LJF2	0.000	375.428	40	35	148	33	1057	114.9	9.03	438.30	2	749925540.25	969209655.561174	1008964530.34475	749925540.25	930115070.03125	773187669.6875
High	G1MH10	0.000	375.133	69	40	146	3	722	80.5	7.20	376.48	36	2306251974.25	2007498980.43599	134000057.169769	2306251974.25	1926523373	102686654.3125
High	G1MC14	0.000	375.054	55	35	162	35	795	87.3	7.42	501.34	0	1046612094.5	974163250.586127	1220246834.71971	1046612094.5	934868854.0625	935097100.25
High	G1M3I5	0.000	374.968	39	44	128	44	1952	210.9	5.59	352.54	0	604807967.3125	773397443.566632	475035004.475273	604807967.3125	742201249.5	364027869.25
High	D2H3S4	0.000	374.618	66	31	204	31	519	56.2	7.72	591.68	0	4810665766	3402508312.72433	2676702257.06573	4810665766	3265262824.625	2051205090.3125
High	D2HIX4	0.000	374.415	40	47	123	47	1591	179.6	5.81	309.80	0	347810676.4375	356382447.89164	476244805.205547	347810676.4375	342007205.125	364954961.3125
High	G1L552	0.000	374.353	48	36	260	36	1009	105.9	5.29	722.97	0	4629037216.125	5579736835.7839	10083820306.9185	4629037216.125	5354669434	7727412897.25
High	D2HHR4	0.000	374.129	43	39	302	39	1086	113.5	8.10	716.46	0	6127301812	4967951217.53191	5442854555.26945	6127301812	4767561144.375	4170957356.25
High	G1L835	0.000	373.927	30	42	163	38	1614	178.8	5.39	436.57	0	1332149412.125	1188132261.62154	593093804.404999	1332149412.125	1140207090.78125	454498451.375
High	D2HDB2	0.000	373.817	52	46	130	45	1145	130.9	7.66	347.05	1	1212988709.875	725014930.117312	765065457.226847	1212988709.875	695770320.3125	586283422.5
High	G1M187	0.000	373.773	42	42	146	41	1239	136.1	7.09	389.91	1	677365913.8125	585471433.926152	750607814.350008	677365913.8125	561855529.03125	575204270.6875
High	G1M9K2	0.000	372.896	54	47	113	47	1182	132.6	6.38	292.20	0	834001153	885336830.742006	97404056.4278648	834001153	849625386.625	74642480.625
High	G1LU41	0.000	372.822	44	46	131	46	1362	150.1	7.88	340.67	0	744429781.9375	918855755.887603	367068282.818275	744429781.9375	881792273.5625	281291028.25
High	G1LHS9	0.000	372.697	56	40	216	30	937	103.8	6.83	554.17	0	1295429814.4375	1362291717.36745	1770479666.20045	1295429814.4375	1307341552.8125	1356750417.05469
High	G1M6S8	0.000	372.378	43	45	155	44	1138	132.0	9.32	411.02	1	514942002.144531	864037700.09702	1377638145.60066	514942002.144531	829185389.6875	1055708893.0625
High	D2HIN2	0.000	372.094	42	50	141	50	1620	178.3	6.60	379.31	0	718017561.28125	1496147831.52589	640130948.572936	718017561.28125	1435798371.5	490543861.09375
High	G1L6T9	0.000	371.896	69	29	151	29	635	68.3	8.73	480.22	0	1506763790.8125	1734400647.94313	636090409.00397	1506763790.8125	1664440888.375	487447522.9375
High	D2GXT4	0.000	371.829	70	28	229	28	449	50.8	7.77	727.82	0	4356144659.6875	3112257365.50228	5798779692.34953	4356144659.6875	2986719602.78125	4443709191.46875
High	G1LF58	0.000	371.685	43	50	147	2	1488	163.9	8.73	387.27	0	5605244.625	5307585.04672408		5605244.625	5093495.3125
High	D2HNS6	0.000	371.636	68	36	159	6	671	73.9	6.71	434.26	28	1546092445.65625	1304161858.64448	1377956118.77375	1546092445.65625	1251556452.75	1055952561.625
High	D2I4R2	0.000	371.389	52	35	298	22	573	67.4	6.35	667.45	15	6318514487.50391	5378448723.4186	10312739628.4034	6318514487.50391	5161500592.09375	7902837891.29297
High	G1M5W5	0.000	371.321	56	34	193	1	860	96.2	5.01	613.14	0	20804496		4034162.4431241	20804496		3091451.25
High	D2I0E9	0.000	371.167	31	54	119	54	2140	241.9	6.99	295.02	0	564025499.863281	406676028.403859	472255697.3292	564025499.863281	390272115.5	361898036.1875
High	G1MEC3	0.000	370.828	25	73	152	73	3058	348.9	6.92	287.06	0	651302950.8125	834252198.484377	4487112694.27654	651302950.8125	800601332.8125	3438555175.5
High	D2I5N7	0.000	370.704	55	48	151	35	722	84.3	7.31	350.94	0	813038453.828125	1136114425.14517	506491223.011948	813038453.828125	1090287475	388133335.375
High	D2H013	0.000	369.926	51	37	196	33	859	96.9	5.41	510.64	1	741833630.625	1306508557.27467	1663624767.27271	741833630.625	1253808493.625	1274865585.8125
High	D2HFF1	0.000	369.704	44	49	127	49	1546	175.7	6.58	325.34	0	498365155.1875	520445972.775906	368568716.570021	498365155.1875	499452971.4375	282440837.625
High	G1M128	0.000	369.280	48	40	176	40	902	100.5	6.07	485.37	0	3165316271.25	2339628681.7838	2325988707.52436	3165316271.25	2245256104	1782446988.375
High	G1LD79	0.000	369.046	28	45	114	28	2474	261.7	6.68	320.08	1	232083599.6875	326190791.907957	401149762.055263	232083599.6875	313033376.75	307408278.875
High	D2H3B6	0.000	368.695	61	49	142	49	912	101.1	5.43	354.64	0	2216904744.125	2162455663.82978	1779208060.09877	2216904744.125	2075229636.5	1363439142.3125
High	D2HS06	0.000	368.490	44	50	154	50	1343	153.4	5.07	406.20	0	1772419313.5	1080204967.32371	577985429.381357	1772419313.5	1036633212.5	442920631.8125
High	G1MCT0	0.000	368.281	25	53	80	53	3271	342.7	4.92	212.69	0	119646578.875	120366583.686381	938534995.739416	119646578.875	115511409.5	719216250.375
High	G1LDW0	0.000	368.160	26	76	131	3	3396	390.0	5.96	273.20	0	8214471.625	49409125.2526523		8214471.625	47416131
High	G1L1K1	0.000	367.180	68	43	168	43	729	83.1	6.29	392.15	0	4599568031.29688	3142756430.46354	246639257.471044	4599568031.29688	3015988440.3125	189004099.75
High	D2GVM8	0.000	367.124	50	46	138	46	1103	123.4	7.34	340.10	0	498837580.625	1577264943.97549	1430592880.69187	498837580.625	1513643498.5	1096289059.15625
High	G1M0I0	0.000	366.446	46	46	177	46	1205	136.2	6.00	439.26	0	1388075526.4375	1321070305.25232	760621028.086887	1388075526.4375	1267782870.75	582877576.5
High	G1LBI3	0.000	365.804	70	26	137	26	501	54.9	4.96	488.77	0	1447643009.125	2239332096.32889	311173330.837192	1447643009.125	2149005138	238457721.0625
High	D2I2I0	0.000	364.702	40	56	123	56	1636	190.4	5.08	304.51	0	321136597.9375	463264593.255772	509565189.331228	321136597.9375	444578092.1875	390488971.0625
High	D2HMA6	0.000	364.016	84	37	200	37	617	68.3	5.52	523.46	0	3215629905.875	3320319297.47911	1397562612.98383	3215629905.875	3186389031.70313	1070977370.83594
High	D2H8J8	0.000	363.220	72	33	717	32	507	54.9	7.91	2005.42	1	20762232923.6563	20880598749.3355	19079661015.7018	20762232923.6563	20038347179.6797	14621087456.9766
High	G1LU75	0.000	362.156	52	36	258	33	579	65.4	5.21	701.33	4	3522746863.5	3784093950.33242	18991474829.3376	3522746863.5	3631456609.4375	14553508796
High	G1MF37	0.000	362.146	25	50	150	48	2862	312.8	9.13	308.16	0	762478804.9375	731767835.414165	1013423266.77967	762478804.9375	702250836.625	776604479.625
High	G1MH95	0.000	362.116	42	36	195	8	1437	137.1	9.06	515.48	26	2529427965.03125	4067388073.76153	12032829188.6188	2529427965.03125	3903323621.84375	9220973463.67261
High	G1LQL3	0.000	361.888	53	22	303	22	590	64.9	8.66	989.89	0	7325426653.48438	7646040335.52513	9096048468.38792	7325426653.48438	7337625354.15625	6970465568.53125
High	G1MB99	0.000	361.819	52	28	241	22	634	70.7	8.48	656.72	6	3655497522.1875	4090161445.44038	7875792948.01963	3655497522.1875	3925178394	6035361812.3125
High	D2GV72	0.000	360.670	53	40	139	40	903	101.4	7.43	370.94	0	1433960950.5	1675545351.4937	768762871.409113	1433960950.5	1607959612.25	589116817.5
High	G1LF87	0.000	360.459	41	50	146	2	1538	169.2	8.97	381.00	41	1142459282.1875	984270958.069972	1397825566.29369	1142459282.1875	944568851.375	1071178876.6875
High	G1L9R5	0.000	360.345	69	21	221	21	440	47.7	5.87	783.50	0	7739319339.01563	5336175587.24562	4972777912.31044	7739319339.01563	5120932608.90625	3810729168.625
High	G1LTZ2	0.000	360.256	63	23	244	23	479	51.7	7.09	725.99	0	6604064966.78125	5750137032.31163	3705902398.81126	6604064966.78125	5518196272.40625	2839899673.03125
High	D2H082	0.000	360.196	34	52	109	51	2070	224.2	7.11	289.43	1	278502934.6875	316911125.569765	160574960.371872	278502934.6875	304128020.25	123051480.6875
High	G1LJV0	0.000	360.143	72	33	165	33	607	70.7	5.94	503.52	0	1009563020.25	1308479803.8992	2339667036.75959	1009563020.25	1255700226.9375	1792928938.125
High	D2HTT9	0.000	360.023	43	40	150	1	1220	134.3	5.33	431.58	0	19049400	20721668.8853146	16950809.18034	19049400	19885828	12989710
High	G1MGQ7	0.000	359.503	52	39	132	39	895	98.5	4.65	376.29	0	999718896.5625	1236721766.74723	848155301.444519	999718896.5625	1186836662.3125	649956664.8125
High	G1LBC3	0.000	359.328	33	32	136	32	1441	161.7	5.68	401.86	0	5640969536.0625	684229086.200913	13093268465.2049	5640969536.0625	656629637.125	10033607157.375
High	G1LEG6	0.000	359.217	53	35	174	35	900	100.8	6.71	513.04	0	2228294819.6875	2156768256.36497	1679571450.05093	2228294819.6875	2069771639.5	1287085815.6875
High	G1LR03	0.000	359.184	42	48	114	3	1233	143.1	7.58	295.07	36	877855549	1337478488.9752	367886624.236781	877855549	1283529204.75	281918138
High	D2H7C0	0.000	358.457	76	26	284	26	456	50.2	6.42	848.57	0	7525041058.1875	7513785227.93647	4580004203.26107	7525041058.1875	7210704962.9375	3509739609.84375
High	D2HRJ5	0.000	356.548	48	34	118	34	1014	112.4	6.32	352.06	0	1597322979.9375	1926821325.0485	413391200.106206	1597322979.9375	1849099976.875	316789113.0625
High	G1M2V5	0.000	355.701	48	20	110	5	717	77.6	5.33	412.30	13	2411079467.75	1941319611.45452	1135143499.94883	2411079467.75	1863013452.25	869880883.90625
High	G1L3F5	0.000	355.451	43	55	111	54	1749	197.2	6.21	279.35	0	398066309	464812701.169379	255801818.463883	398066309	446063754.75	196025535.0625
High	D2HJ06	0.000	354.951	55	34	193	1	868	96.8	5.06	593.45	30	3360941588.3125	2633202255.49194	2214629385.78924	3360941588.3125	2526987929	1697110336.90625
High	G1LI00	0.000	354.619	31	50	112	48	2076	239.2	9.06	283.14	0	506011749.5625	437103787.409256	227199641.551442	506011749.5625	419472523.3125	174107172.375
High	G1LEW1	0.000	354.310	45	42	227	26	1021	112.7	5.49	608.53	17	3254826289.4375	2915257304.70828	4925043995.09719	3254826289.4375	2797665847.1875	3774149809.1875
High	D2H1U0	0.000	354.258	69	34	119	2	644	72.0	5.07	371.12	31	1633330951.4375	1403300599.04799	1007815334.43282	1633330951.4375	1346696277.1875	772307020.1875
High	D2HLH4	0.000	354.207	50	45	121	43	1450	154.3	6.64	393.13	0	286579370.5625	298445773.302495	1048995488.94801	286579370.5625	286407496.8125	803864113.375
High	D2I068	0.000	354.041	46	43	132	43	1271	140.9	6.01	351.13	0	731230193.5625	841662416.582401	508412790.114609	731230193.5625	807712648.1875	389605866.8125
High	G1L8K6	0.000	353.817	60	35	223	35	741	81.0	6.43	649.04	0	4679795323.09375	3937852440.87059	2964601750.04798	4679795323.09375	3779013011.0625	2271827650.75781
High	G1MA93	0.000	353.016	68	31	423	31	557	60.4	5.88	1146.69	0	16407200908.1094	15958544438.0478	9855349329.50748	16407200908.1094	15314831618.1367	7552331477.33594
High	G1LW26	0.000	352.622	65	31	158	24	692	75.8	6.46	476.68	7	902277130.25	1296886192.27564	3511706965.1166	902277130.25	1244574261.75	2691084218.84375
High	G1MF58	0.000	351.825	55	26	152	26	534	61.0	6.09	431.51	0	1874857566	2019684317.88575	1608986113.16052	1874857566	1938217195.82813	1232995002.28125
High	G1LHA1	0.000	351.806	52	31	181	1	758	83.6	6.52	563.69	0	12685540	23102972.486058	11419142.0893573	12685540	22171078	8750694
High	D2H5L1	0.000	351.404	71	19	327	14	254	28.8	7.18	946.81	7	11645709014.1094	12886401151.5441	18016600022.1966	11645709014.1094	12366608030.3125	13806444694.4375
High	G1L7P0	0.000	351.257	51	52	144	2	1185	134.1	6.46	370.39	45	1066743321.3125	1166828015.08794	301646718.785825	1066743321.3125	1119762184.3125	231157306.875
High	G1LIQ7	0.000	351.213	45	46	117	43	1601	172.0	5.29	333.64	3	794367008.875	615786827.333362	1051812393.98154	794367008.875	590948103.6875	806022758.375
High	D2H0M4	0.000	350.754	51	51	143	1	1174	132.7	6.29	370.39	0	5221541.5			5221541.5
High	G1LUW8	0.000	350.721	50	41	191	30	928	105.9	6.64	501.41	11	2670569798.78125	4609036133.42721	2315750840.39293	2670569798.78125	4423123460.875	1774601526.625
High	G1LUX8	0.000	350.261	44	43	114	3	1229	136.8	7.09	286.53	37	528239874.6875	718929022.918198	215832119.922621	528239874.6875	689929897.6875	165396036.0625
High	G1LPG8	0.000	350.138	52	40	101	40	1056	117.9	5.81	309.23	0	743127373.25	891821317.000114	110046415.920013	743127373.25	855848311	84330548.125
High	D2HSZ9	0.000	349.198	47	39	154	37	1074	118.1	6.43	439.83	2	880548905.914063	734604836.927075	1596931125.63365	880548905.914063	704973403.25	1223757048.48438
High	G1LGT2	0.000	348.909	56	41	196	41	831	94.4	6.83	500.99	0	1677657298.25	1742112706.77428	1276813258.76919	1677657298.25	1671841869.26563	978444968.5625
High	G1LU50	0.000	348.508	52	38	197	38	1010	113.3	7.43	497.97	0	2205923704.0625	2618719535.93667	1142646241.94381	2205923704.0625	2513089392.5625	875630370.0625
High	G1LC07	0.000	348.191	36	38	114	38	1484	165.8	6.49	324.51	0	984904683.125	663747647.370128	209385644.116164	984904683.125	636974349.125	160455985.6875
High	G1LZX2	0.000	348.189	61	31	136	31	655	72.6	7.34	432.25	0	1384962807.5	1327756547.98553	575446170.674944	1384962807.5	1274199413.4375	440974752.1875
High	G1M0U2	0.000	347.742	37	43	116	6	1471	165.5	5.06	297.70	32	699992777.5	441524526.514525	421579368.763369	699992777.5	423714945	323063854
High	G1LJ67	0.000	347.740	45	51	131	51	1433	160.9	8.38	317.87	0	1384631141.375	972433546.715926	371123377.580272	1384631141.375	933208920.5	284398520.3125
High	D2H0J9	0.000	347.480	67	38	101	38	820	93.6	5.58	294.84	0	609402889.0625	864348092.900641	522244197.36603	609402889.0625	829483262.3125	400205123
High	G1M1F0	0.000	347.307	46	34	145	34	1072	118.2	7.06	399.82	0	490706760.875	401013942.446617	3522320861.72986	490706760.875	384838418.625	2699217838.75
High	G1M4G1	0.000	346.819	42	31	152	31	936	103.0	4.75	433.19	0	1711061818.625	1265223617.09325	2635433724.17695	1711061818.625	1214188846	2019580271.1875
High	G1L0F8	0.000	346.492	67	33	156	1	628	69.4	6.20	437.75	0	31219224.375	15755354.8504793	12890529.9680784	31219224.375	15119838	9878245
High	G1LIP1	0.000	346.257	40	35	210	35	739	84.0	4.94	570.01	0	3494884255.0625	4120873321.04516	5041014713.33519	3494884255.0625	3954651458.125	3863020256.75
High	G1LUS6	0.000	346.249	60	29	189	21	589	65.3	5.11	559.58	0	3578600855.9375	3048714413.61665	3097237238.64365	3578600855.9375	2925739755.125	2373468611.625
High	G1LFK8	0.000	346.113	27	65	150	65	2820	316.9	7.42	317.73	0	519119027.9375	450568744.292218	777532620.192281	519119027.9375	432394350.125	595837233.75
High	G1LSM8	0.000	345.927	36	42	148	26	1531	166.4	6.60	373.01	13	1047278696.6875	1247750941.68533	1981076395.03778	1047278696.6875	1197420958.25	1518134478.75
High	G1LFP1	0.000	345.872	37	37	115	37	1251	139.9	7.14	304.49	0	570965962.054688	560179486.823111	912497653.812148	570965962.054688	537583772.125	699263366.875
High	D2H044	0.000	345.485	54	44	115	44	970	109.2	9.07	313.80	0	961657106.125	1084612878.95008	799243028.3455	961657106.125	1040863324.125	612474310.0625
High	G1LC83	0.000	345.073	58	31	154	22	696	76.8	5.31	468.97	8	2680905468.5	2638201767.29825	1120776224.42081	2680905468.5	2531785777.6875	858870982.21875
High	G1M0A1	0.000	344.450	52	41	86	41	1224	130.9	6.38	251.27	0	754669196.5625	444572420.322611	169595512.798636	754669196.5625	426639897.25	129964092.28125
High	G1MAK7	0.000	344.433	42	37	137	37	832	95.7	7.47	400.04	0	2753515225.5	2712211332.67077	220121785.062218	2753515225.5	2602810051.625	168683283.625
High	G1MEC4	0.000	344.391	67	26	363	12	406	46.1	5.48	964.62	0	2098843176.4375	2193981388.59298	3360736692.37258	2098843176.4375	2105483721.90625	2575392983.0625
High	G1LP43	0.000	343.396	35	40	115	40	1493	169.6	6.61	303.62	0	628236076.125	659294640.246428	1083504276.11039	628236076.125	632700961	830308817.75
High	G1LYF1	0.000	342.854	46	29	99	29	912	102.5	5.92	297.45	0	1039927707.4375	1295416056.03372	84109115.0346076	1039927707.4375	1243163425.75	64454327.875
High	G1LQ91	0.000	342.803	34	61	127	61	2075	234.3	6.95	265.28	0	287980552.5625	273312789.644593	548828323.648633	287980552.5625	262288291.3125	420577017.1875
High	G1M962	0.000	342.765	44	48	118	47	1610	176.8	8.15	297.99	1	948434990.125	1803310873.06203	669115918.641128	948434990.125	1730571511.91406	512755565.0625
High	G1MGU8	0.000	342.734	59	28	146	28	603	67.2	6.38	438.23	0	1567201914.625	1866404441.08993	758092299.318917	1567201914.625	1791120102.3125	580939766.15625
High	G1M838	0.000	342.730	41	55	148	50	1438	161.2	5.30	331.08	5	1190941982.9375	969480447.599827	1142024254.39171	1190941982.9375	930374939.25	875153729.8125
High	D2I0F1	0.000	342.691	49	44	114	1	1261	140.4	5.62	303.24	0
High	G1LRP2	0.000	342.569	16	36	92	29	3427	377.7	4.91	288.18	5	257976348.875	198386476.441193	719724584.695109	257976348.875	190384248	551537896.25
High	D2HLF9	0.000	342.276	61	40	119	40	903	99.2	6.40	326.62	0	472206647.625	585663244.238491	280146245.573742	472206647.625	562039602.375	214681107.484375
High	G1L1M0	0.000	342.201	62	22	257	21	480	52.7	6.37	828.46	1	5088850965.625	5649591126.628	3301283845.77307	5088850965.625	5421706042.89844	2529833197.22656
High	D2HT93	0.000	341.917	37	36	146	18	1220	134.7	5.85	422.99	1	192372533.125	310902958.515851	568719383.932775	192372533.125	298362202	435819894.5
High	D2H1M8	0.000	341.159	42	41	114	1	1231	137.1	6.90	291.40	0	55767136	24698838.2235997	17253030.9777895	55767136	23702572	13221308
High	G1LU20	0.000	340.390	38	62	145	22	1988	225.1	7.30	320.00	36	329659261.875	676541328.353533	695835005.62413	329659261.875	649251977	533230882.0625
High	D2HYB0	0.000	340.195	61	33	149	33	737	82.5	5.26	425.75	0	1273554059.4375	1244732095.75633	804469099.754056	1273554059.4375	1194523882.1875	616479142.59375
High	G1L1G7	0.000	340.162	76	31	177	31	508	56.0	6.70	485.37	0	2847275193.625	1494025745.62606	435796326.062954	2847275193.625	1433761883.25	333958564.125
High	G1MC06	0.000	340.024	61	30	239	30	542	59.9	5.38	716.65	0	2256625055	3094867904.89653	18997573059.0403	2256625055	2970031573.23438	14558181979.1211
High	D2I656	0.000	339.359	60	27	95	24	679	76.3	6.86	313.83	0	1059332144.75	797825445.041894	396956476.373772	1059332144.75	765643909.375	304194888.625
High	D2H6U7	0.000	339.339	29	47	125	47	2041	225.6	8.69	337.79	0	475259666.625	653299880.171453	277099907.573821	475259666.625	626948008.9375	212346643.875
High	D2HAS3	0.000	339.307	46	35	171	3	901	99.8	6.19	455.31	31	3580013474.4375	1798273873.39785	1370207911.65007	3580013474.4375	1725737687.5	1050014971.125
High	G1LCK0	0.000	339.084	33	49	106	46	2051	234.3	7.46	286.37	3	204083208.25	235570678.963058	577504737.041007	204083208.25	226068567.625	442552268.625
High	G1LCZ5	0.000	338.781	34	46	114	46	1845	211.6	7.02	294.66	0	723333811.375	607005645.71767	468178987.356231	723333811.375	582521124.75	358773980
High	D2H9I7	0.000	338.762	45	42	122	42	1294	148.6	6.04	299.45	0	507381963.25	570525851.804963	1238159180.4433	507381963.25	547512800.3125	948823653
High	G1L1L9	0.000	338.748	45	21	654	11	372	39.1	9.23	1670.41	7	7596891515.78711	5587489714.21552	13316710725.8721	7596891515.78711	5362109587.96875	10204834981.1875
High	G1LWX6	0.000	337.747	42	42	134	40	1261	134.8	5.96	331.82	2	1573857360.05469	1747230188.63385	533878439.293058	1573857360.05469	1676752929.5	409120651.875
High	G1LDS5	0.000	337.565	64	34	166	34	523	60.0	7.40	400.24	0	2439972483.375	2734301826.04259	2790692328.41055	2439972483.375	2624009490.4375	2138557732.53125
High	G1LIN2	0.000	337.077	45	43	212	43	1048	120.0	5.66	514.66	0	1920676936.8125	2265117925.59683	2012694716.40162	1920676936.8125	2173750855.5625	1542364167.1875
High	D2HE30	0.000	337.012	43	45	133	45	1485	163.4	7.05	306.62	0	631625403.0625	790982904.804697	297468089.226419	631625403.0625	759077373.6875	227955147.875
High	D2HIT4	0.000	336.957	55	29	96	29	756	86.6	6.84	303.26	0	482014469.6875	512500296.055364	361974557.293189	482014469.6875	491827796	277387614.75
High	G1L359	0.000	336.780	49	44	114	1	1266	141.0	5.62	298.37	38	754482851.625	687187030.309867	220103012.176536	754482851.625	659468267.9375	168668897.625
High	G1LNJ1	0.000	336.323	42	33	163	1	920	101.7	6.92	435.58	0	7800824	2753030.01642066		7800824	2641982.25
High	D2H2H6	0.000	336.012	25	42	107	42	2201	240.7	5.08	279.33	0	198479117.625	560918015.467179	1005009363.58408	198479117.625	538292511.0625	770156754.25
High	D2HVW4	0.000	336.002	34	19	1031	7	739	82.3	5.76	2661.32	0	1550017991.5	2380073556.74734	304003170.629365	1550017991.5	2284069571.75	232963098.3125
High	G1L1T4	0.000	335.849	74	27	120	27	614	65.7	7.46	394.87	0	1113348717.625	794974854.259574	1348356125.74757	1113348717.625	762908301.625	1033269554.5
High	G1LE18	0.000	335.768	42	39	130	39	1221	139.1	6.00	396.27	0	363419846.25	670146528.420971	985839162.911165	363419846.25	643115121.3125	755466284.625
High	D2I6A5	0.000	335.467	77	30	143	29	483	54.4	8.66	410.88	1	1482704135.375	2098314313.64522	1645314405.55975	1482704135.375	2013675527.875	1260834026.25
High	G1LKF9	0.000	335.437	59	33	117	1	704	78.7	5.45	356.55	0	142865123.375	111535973.739225	52352300.983591	142865123.375	107036996	40118510
High	G1M0R1	0.000	335.173	23	50	111	50	2812	317.0	8.00	254.09	0	539512217.5	362277047.168088	687096647.448843	539512217.5	347664036.53125	526534521
High	G1M0C1	0.000	334.999	61	26	1046	7	449	50.0	5.19	3038.74	0	82865406.8125	112045514.290866	1212448752.65762	82865406.8125	107525983.4375	929121289.6875
High	D2HJD1	0.000	334.588	53	30	119	30	760	84.6	6.40	345.45	0	546601294.75	539628920.502016	1621559049.40798	546601294.75	517862145	1242629869.5
High	D2H8H7	0.000	334.492	74	30	335	28	414	46.8	6.80	834.62	2	10362821396.9688	8918877683.86205	5915809505.88882	10362821396.9688	8559120819.65625	4533391242.8125
High	G1MGC3	0.000	334.440	37	38	157	38	1423	155.2	8.70	419.91	0	1826586747.1875	1677954029.76323	1003026350.22061	1826586747.1875	1610271132.71875	768637135.4375
High	G1M257	0.000	334.401	77	23	1392	8	427	48.0	4.84	3500.84	2	253020182.375	870892709.810002	858458012.903931	253020182.375	835763891.875	657851817.9375
High	D2HWR8	0.000	334.122	80	25	140	25	439	48.3	6.90	414.89	0	2247068042.125	2497486018.30272	654511749.939973	2247068042.125	2396746018.25	501564127.875
High	G1LJJ2	0.000	333.673	53	26	139	25	630	69.0	6.76	453.35	1	2627345519.875	2756256521.41496	1043450813.54958	2627345519.875	2645078608.875	799615128.875
High	G1LKD3	0.000	333.456	44	25	242	23	670	70.1	7.81	711.90	2	4203809900.3125	3861766713.57613	5483832875.16473	4203809900.3125	3705996320.4375	4202359779.9375
High	G1LRX2	0.000	333.180	20	44	115	42	3047	327.7	5.29	297.18	2	621080216	630532152.756551	383642499.149159	621080216	605098653.375	293992148.375
High	D2HBU3	0.000	333.160	38	35	90	35	1461	155.9	7.42	272.09	0	372484436.25	261790310.95075	281449128.114264	372484436.25	251230589.796875	215679529.8125
High	D2GZQ8	0.000	332.780	80	26	181	26	426	44.3	8.56	560.15	0	3576398644.5	2228667152.14474	904780233.108526	3576398644.5	2138770381	693349368.5625
High	G1LYU0	0.000	331.959	54	31	154	25	781	85.5	5.86	414.77	6	1841954805	1679812482.12366	2351331037.13916	1841954805	1612054621.5	1801867271.4375
High	P18970	0.000	331.939	96	16	1546	15	142	15.2	8.22	4958.76	1	143140228592.438	61173146054.1154	121660268727.157	143140228592.438	58705631645.0039	93230452450.6563
High	G1MJD7	0.000	331.820	26	52	143	46	2680	298.5	5.54	337.34	5	680065772.625	735412076.378912	655318021.793188	680065772.625	705748081.4375	502181988.5
High	G1LVR2	0.000	331.399	60	38	301	31	731	80.4	8.37	719.93	10	9506727783.5	10625206079.4984	13196315620.8022	9506727783.5	10196621793.875	10112574046.4063
High	G1MH03	0.000	331.021	57	24	279	1	543	59.7	5.29	733.70	27	10365554137.875	6897214170.91087	2175178421.85928	10365554137.875	6619004262.6875	1666878353.57031
High	G1L1H1	0.000	330.503	37	36	160	29	1106	122.6	5.20	348.84	3	955761200.625	1072737528.38363	375527701.388048	955761200.625	1029466984.375	287773632.875
High	G1M755	0.000	330.027	50	38	121	38	1128	126.0	5.72	309.82	0	675830685.875	1005542534.2631	760139614.684904	675830685.875	964982405.3125	582508660.75
High	G1L8T5	0.000	329.898	64	28	206	26	412	46.3	7.83	553.54	1	3298731738.1875	3259186276.72737	2811872123.48971	3298731738.1875	3127721906.84375	2154788190.5
High	G1M8J9	0.000	329.832	26	39	151	39	2287	248.0	5.76	409.95	0	935442784.5	992704533.640303	870621700.104876	935442784.5	952662245.5	667173070.25
High	D2GXT5	0.000	329.623	32	26	232	26	883	95.4	5.64	702.78	0	5315980495.35938	3803377294.77961	6153309795.7059	5315980495.35938	3649962130.0625	4715391987.25
High	G1LTJ1	0.000	329.532	34	45	142	1	1655	183.1	6.01	340.12	0		2980242.74684797	1799291.08426363		2860030	1378829.125
High	G1L2C1	0.000	329.455	74	29	348	15	408	46.5	5.48	915.51	16	9186414775.125	9664534649.83582	7589444912.33076	9186414775.125	9274700547.0625	5815928161.5
High	G1M7J2	0.000	329.327	71	30	232	30	467	51.6	5.63	636.67	0	6579288337.3125	7312218374.3915	3312480599.14254	6579288337.3125	7017268623.3125	2538413470.75
High	G1L8N8	0.000	329.183	38	43	136	39	1337	150.6	7.91	342.33	4	649131082.9375	971425985.146018	1294161138.18269	649131082.9375	932242000.5	991738960.625
High	G1MFJ2	0.000	329.053	63	31	133	24	621	68.6	7.03	379.51	6	1459851446.625	2140281799.88829	878104886.616403	1459851446.625	2053950190	672907570.6875
High	G1LCE0	0.000	329.015	30	50	92	49	2197	248.6	5.92	201.83	0	635228928.3125	271205770.680655	196194632.449093	635228928.3125	260266262.25	150347476.15625
High	G1LTX1	0.000	328.741	64	29	118	29	667	75.6	6.96	378.91	0	853848046.875	687050142.800848	265065750.233779	853848046.875	659336902	203124652.625
High	G1LBD3	0.000	328.664	36	33	130	32	1039	119.5	4.81	370.31	1	1328236209.3125	1576656095.30056	1969352074.43942	1328236209.3125	1513059208.6875	1509149920.96875
High	G1M9S2	0.000	328.466	63	33	258	33	476	53.7	8.43	648.63	0	4503009736.75	3948883391.82197	3188887958.57896	4503009736.75	3789599011.375	2443702207
High	G1M7X2	0.000	328.442	61	25	158	23	459	53.4	5.16	479.01	2	3233618605.375	3697103504.2975	876001584.415477	3233618605.375	3547975058.9375	671295772.375
High	G1MHP6	0.000	327.772	51	48	186	48	1032	117.4	9.29	413.77	0	1469587985.5625	1591633618.14444	1732540089.74037	1469587985.5625	1527432589.75	1327676637.125
High	G1LZJ8	0.000	327.650	25	56	149	45	2701	307.5	6.37	308.13	3	303869710.40625	297421045.460434	271184606.822546	303869710.40625	285424102.96875	207813642.5
High	G1MBH6	0.000	327.137	47	31	136	1	711	81.1	5.05	445.93	0	2576955.6875	3172100.89496795	2081279.11423525	2576955.6875	3044149.25	1594921.625
High	D2H2J5	0.000	326.640	34	30	92	7	1138	124.3	5.24	261.46	19	463736805.75	502626589.033189	360812317.840389	463736805.75	482352360.375	276496969.75
High	G1LHT1	0.000	326.559	59	26	120	26	579	62.9	5.26	423.47	0	1135780041.875	1332481312.02066	648207629.854759	1135780041.875	1278733596.73438	496733167.25
High	D2H0D1	0.000	326.199	36	58	105	58	2109	239.3	5.78	231.42	0	381552421.6875	201884710.163216	450214439.902315	381552421.6875	193741375	345007424.125
High	D2HEJ5	0.000	325.772	61	44	137	44	857	94.3	6.44	365.65	0	2902795864.8125	2237180734.80086	195832668.277175	2902795864.8125	2146940555	150070096.5
High	D2GXF9	0.000	325.626	58	24	282	1	508	55.8	5.03	737.34	0	25006555.75	32558188.3902331	16295538.4476624	25006555.75	31244903	12487564.25
High	G1LWB5	0.000	325.434	36	37	106	35	1621	177.5	7.59	292.57	1	600532097.875	895205076.165178	199877386.1	600532097.875	859095580.953125	153169636.527344
High	G1M1W7	0.000	325.296	63	27	196	27	473	53.3	9.11	525.78	0	2045355416.0625	3251097715.76654	3612492664.03041	2045355416.0625	3119959610.625	2768318112.9375
High	G1M5E0	0.000	324.996	41	48	134	30	1256	145.6	6.90	304.43	11	1260444398.125	1992110275.48185	2128293223.70153	1260444398.125	1911755395.5	1630949382.8125
High	D2HH98	0.000	324.809	35	47	140	38	1336	155.1	5.99	339.98	6	838115715.75	597539579.65542	1250506549.38871	838115715.75	573436887.25	958285663.9375
High	G1L0J4	0.000	324.386	57	30	299	17	636	70.7	9.57	714.19	14	10921082946.9375	10492138094.0554	5353349861.67037	10921082946.9375	10068921313.5	4102368299.46094
High	G1M9W4	0.000	324.002	49	31	94	31	863	96.7	5.82	248.05	0	1526395202.25	1098371874.59588	1737195097.09636	1526395202.25	1054067329.1875	1331243853
High	G1M562	0.000	323.843	55	26	163	26	575	64.5	9.17	425.39	0	1010957846	1024531163.79894	3781917426.60439	1010957846	983205098.8125	2898151356.25
High	D2HRJ6	0.000	323.277	38	43	128	42	1274	145.1	7.33	324.47	0	610053595.375	714328153.954638	983651578.302751	610053595.375	685514611.960938	753789899.1875
High	G1LR13	0.000	323.150	68	34	156	34	666	74.4	5.57	426.11	0	1716713889.75	1415624535.98391	1842317355.31678	1716713889.75	1358523108.875	1411800930.5
High	D2HJD9	0.000	322.963	46	31	138	1	689	78.7	5.00	448.02	28	898525309.5625	996151313.776565	2243778884.73361	898525309.5625	955969994.375	1719448122.3125
High	G1LJW1	0.000	322.955	53	35	234	32	675	74.7	7.56	628.98	0	3506148397.35938	3352183839.35027	3553046994.31245	3506148397.35938	3216968267.5	2722763826.875
High	G1L7R6	0.000	322.862	56	36	148	36	769	86.0	6.54	415.10	0	1134079143.875	1207400394.71371	571581000.1704	1134079143.875	1158698013.625	438012802.5
High	D2H5P6	0.000	322.482	26	50	102	50	2543	283.8	6.49	238.69	0	157096061.6875	210472202.194441	146390667.955357	157096061.6875	201982477.125	112181802.25
High	G1LX38	0.000	322.476	19	57	113	56	3656	409.9	6.40	252.52	0	280090022	688087841.108137	579860321.343253	280090022	660332743.125	444357395.25
High	G1LS26	0.000	322.425	36	28	135	28	1164	122.5	5.64	444.52	0	1613770816.4375	1581919215.67006	823314368.368892	1613770816.4375	1518110032.875	630920610.9375
High	G1LRG2	0.000	322.285	58	34	277	19	583	68.6	6.27	627.20	2	2692444742.9375	2424457108.77828	3150925929.02344	2692444742.9375	2326662843.875	2414611220.85938
High	D2I1P6	0.000	322.221	56	35	161	35	796	87.1	6.33	472.93	0	1550858983.125	1661955430.81325	731616481.574624	1550858983.125	1594917862.25	560650870.75
High	G1LND3	0.000	322.033	78	20	134	20	295	33.1	5.35	452.85	0	2525940144.125	2532781549.20679	1951607417.38506	2525940144.125	2430617848.77734	1495551871.0625
High	G1M386	0.000	321.911	47	36	117	34	925	104.7	5.48	348.67	1	581544137.257813	594323106.563574	957186645.033143	581544137.257813	570350155.625	733509344.75
High	G1M927	0.000	321.382	53	40	186	40	903	101.7	5.58	515.87	0	1567557121.40625	1614664821.63794	1879724247.64881	1567557121.40625	1549534793.67188	1440466505
High	G1MIX0	0.000	320.662	66	29	221	29	534	57.7	8.37	639.52	0	4768885242.95313	4151811027.80876	3070408464.53341	4768885242.95313	3984341244.15625	2352909239.40625
High	G1LVF6	0.000	320.632	53	41	272	40	795	90.9	7.46	629.58	1	2133661825.79492	2405508201.71348	2429176678.23735	2133661825.79492	2308478270.57813	1861521786.5625
High	D2GVY2	0.000	320.143	28	54	130	53	2205	250.2	5.97	281.67	1	974974716.875	701566241.310905	438374643.049267	974974716.875	673267471	335934374.8125
High	D2HCH6	0.000	319.903	33	47	144	3	1719	190.0	6.14	332.56	39	962438538.5	3354574044.24876	5417551405.45721	962438538.5	3219262059.75	4151567097.375
High	D2HYP5	0.000	319.418	46	29	118	29	908	98.0	9.41	356.55	0	304972775.5	783842437.071536	1203207722.44459	304972775.5	752224927.875	922039722
High	G1LSK4	0.000	319.101	77	23	157	23	301	34.2	7.87	419.82	0	3334474322.6875	4064445642.61072	3555319449.235	3334474322.6875	3900499878.25	2724505249.96094
High	D2HKS0	0.000	318.808	40	46	106	1	1202	139.6	7.91	273.01	0
High	G1MHN7	0.000	318.776	81	23	251	23	289	32.6	6.37	678.54	0	11086904072.959	9979343136.6231	2252822538.9034	11086904072.959	9576810741.75	1726378437.1875
High	G1M3J7	0.000	318.422	50	42	110	42	1105	123.2	7.94	296.69	0	1320153067.75	1329481454.07995	479489565.016444	1320153067.75	1275854742.75	367441479.125
High	G1LGL0	0.000	318.405	47	45	122	44	1005	115.9	9.28	329.95	1	665798715.375	275278608.194241	653443265.789865	665798715.375	264174815.5	500745329.25
High	G1ME99	0.000	318.300	50	20	1359	3	452	50.2	5.01	4404.64	0	24601383.625	53918601.0666916	10943631.2631536	24601383.625	51743710.0625	8386301.5
High	G1LSW0	0.000	317.757	37	48	218	30	1052	121.9	8.09	463.34	18	2101101902.375	3125730020.5268	2238617363.75068	2101101902.375	2999648817.21875	1715492755.93359
High	D2HHB0	0.000	317.453	66	27	217	27	505	55.1	7.23	616.84	0	3902644369.95313	4506411087.24239	3372442194.39192	3902644369.95313	4324637956.24609	2584363119.82813
High	D2HGU3	0.000	317.364	53	33	229	28	894	101.7	4.97	594.76	6	2075372557.625	4756282572.3792	6161241457.51425	2075372557.625	4564430484.6875	4721470162.375
High	G1LAA0	0.000	316.959	56	31	156	29	655	71.8	6.20	415.13	3	2624695653.875	2393356050.76822	655606573.514829	2624695653.875	2296816295.625	502403110.875
High	G1LVG4	0.000	316.867	56	33	116	33	818	90.5	8.40	310.15	0	549695788.75	711581134.158921	836706752.258071	549695788.75	682878397.5	641183435.625
High	G1M1L4	0.000	316.371	29	48	95	47	2137	247.9	5.99	227.25	0	233872679.125	506783810.948439	167410299.309361	233872679.125	486341894.25	128289523.875
High	G1MDU8	0.000	316.298	46	36	111	36	880	98.6	6.11	279.58	0	571212382.625	625557447.238116	575277555.864402	571212382.625	600324610.375	440845539.625
High	G1M8V5	0.000	316.070	44	32	98	30	942	107.9	6.38	297.24	1	322655033.3125	319283006.921891	876604294.722082	322655033.3125	306404228.0625	671757640.125
High	G1MGJ0	0.000	315.505	57	30	473	29	510	57.4	5.01	1272.22	1	20206968736.4648	18066346728.9405	17787472268.3443	20206968736.4648	17337612410.875	13630859974.9219
High	G1LM50	0.000	315.228	41	36	89	36	1342	147.0	4.77	267.49	0	320585403	298139677.724821	430907669.291691	320585403	286113748.078125	330212298.5
High	D2H155	0.000	314.913	33	46	144	2	1660	185.4	6.60	345.21	0	23000196.5	25410941.0015769	8065588.4243217	23000196.5	24385951	6180805.5
High	D2H881	0.000	314.906	52	37	170	37	749	87.1	6.05	441.02	0	1571344445	1295403849.4105	2113568477.44465	1571344445	1243151711.5	1619665544.875
High	G1LVI5	0.000	314.671	54	28	183	28	420	48.4	7.39	513.43	0	2212860167.4375	2715672732.64608	2481284459.72612	2212860167.4375	2606131830.625	1901452916.875
High	D2H1P9	0.000	314.555	56	29	123	29	750	83.2	7.20	374.61	0	1877174116.0625	1978228244.51413	1130045907.18939	1877174116.0625	1898433317.9375	865974506.875
High	G1LI10	0.000	314.532	41	33	121	33	1073	116.8	9.04	387.02	0	1562641887.375	1593636782.38786	802896936.355412	1562641887.375	1529354953.23438	615274365.5
High	D2GZU1	0.000	314.359	68	36	110	36	701	78.5	6.70	332.56	0	1045675277.5	907980837.633837	169015287.079371	1045675277.5	871356012.125	129519454.875
High	G1LM38	0.000	314.350	32	32	169	31	1343	151.6	6.21	483.98	1	2023549396.5	2185385924.91935	1827483827.52115	2023549396.5	2097234969.6875	1400433731.3125
High	D2HV21	0.000	313.694	37	34	106	31	982	114.3	5.99	294.87	0	380756206.375	321750423.329732	359240637.392368	380756206.375	308772117.375	275292562.75
High	G1LRN2	0.000	313.568	33	51	89	2	2226	248.9	6.21	216.45	0	13159808	16268189.3303614	2810204.81237522	13159808	15611986.5	2153510.5
High	D2I2A2	0.000	313.528	68	26	232	20	511	56.6	5.81	642.68	7	3234258408.625	2595816185.43716	1267438260.01895	3234258408.625	2491109884.48438	971260738.375
High	G1LSG6	0.000	313.397	29	61	137	60	2540	285.9	6.29	261.63	0	475040504.5625	569110143.62911	632110702.087936	475040504.5625	546154196.9375	484397801.9375
High	G1M845	0.000	313.173	36	33	113	33	1151	130.1	5.06	321.35	0	517003338.125	508451728.573939	243766829.305315	517003338.125	487942533.8125	186802906.375
High	G1LR07	0.000	313.144	72	31	228	31	499	54.8	8.24	602.42	0	6918230615.0625	5384694295.58647	6355397768.25286	6918230615.0625	5167494239.35156	4870255635.9375
High	G1M4C8	0.000	312.710	24	42	198	2	2034	231.7	5.59	487.04	22	199920694	174521731.810668	127702344.917297	199920694	167482125.125	97860604.125
High	D2HJ02	0.000	312.271	74	22	401	16	434	47.2	5.12	1260.93	2	572168477.625	613864759.799273	1304766045.01449	572168477.625	589103565.75	999865691.5
High	G1MD07	0.000	311.800	32	43	90	43	1948	216.5	6.28	220.60	0	325104649.90625	295281341.176817	181604568.165305	325104649.90625	283370707	139166847.4375
High	D2HXM0	0.000	311.649	71	25	200	24	448	48.4	7.77	624.84	0	5571661225.25	5138673608.885	4590668775.14956	5571661225.25	4931397181.375	3517912063.125
High	G1LEE1	0.000	311.562	56	42	126	42	1062	114.9	7.94	334.21	0	1002159069.00781	842004219.225984	212786034.082218	1002159069.00781	808040663.6875	163061765.6875
High	G1M4I1	0.000	311.551	49	35	100	35	854	94.0	6.47	260.59	0	569377579.8125	625459004.522392	479956906.257578	569377579.8125	600230138.5	367799611.125
High	G1MDZ7	0.000	311.419	57	27	105	5	694	77.1	5.74	319.56	1	96265144	112902780.786672	348477799.875441	96265144	108348670.75	267044806.75
High	D2I7C5	0.000	311.005	58	24	739	2	455	49.3	9.10	2232.27	2	4099740336.59375	4160120732.27425	4218150444.99661	4099740336.59375	3992315763.71094	3232444565.5625
High	G1LSW8	0.000	310.965	58	25	136	25	548	63.8	6.51	372.62	0	1312667101.375	1313237190.4553	1147464052.22798	1312667101.375	1260265716.875	879322344.75
High	D2HEN4	0.000	310.701	56	42	111	42	978	112.0	6.38	295.26	0	488501599.75	364517146.935374	389734222.093273	488501599.75	349813778.375	298660345.25
High	G1MAN2	0.000	310.613	63	23	220	23	454	49.5	7.21	570.11	0	6733255256.3125	6593896765.20505	5407427335.08022	6733255256.3125	6327921638.375	4143808840.125
High	G1MIK9	0.000	310.594	74	23	338	22	378	42.3	5.80	991.20	1	4219228420.57227	2547752821.23048	4847955956.07042	4219228420.57227	2444985231.15625	3715075858.1582
High	G1LA29	0.000	310.293	53	43	133	43	1025	115.5	8.73	311.38	0	575496888.125	693714215.587115	904362315.785468	575496888.125	665732169	693029111
High	G1LYP7	0.000	310.028	45	28	206	2	660	72.2	9.31	528.35	17	2881652258.4375	2629219035.85543	2125508794.66081	2881652258.4375	2523165378.75	1628815624.75
High	G1M2E7	0.000	309.948	42	35	74	3	1434	157.7	7.46	261.27	20	222820496.375	206127834.720737	135394497.96078	222820496.375	197813346.5	103755239.375
High	G1M6R5	0.000	309.768	60	22	196	22	524	57.3	6.83	572.53	0	7232492526.9375	5119825150.23584	329992093.540217	7232492526.9375	4913309004.75	252878877.449219
High	G1LXA3	0.000	309.680	36	40	119	35	1387	157.9	6.28	288.35	5	719523212.25	799281693.537371	328498081.960275	719523212.25	767041417.8125	251733989.5
High	D2HB31	0.000	309.524	20	28	196	27	1691	171.7	6.46	529.96	0	4084655950.10938	4195311069.71943	2462497722.09242	4084655950.10938	4026086643.92188	1887056301.875
High	G1M6B5	0.000	309.444	42	45	124	43	1265	148.0	6.70	310.44	2	375730027	314193605.007656	1198954915.9432	375730027	301520115.125	918780719.875
High	G1L1J0	0.000	309.367	75	29	141	28	475	52.5	6.89	417.47	1	5405234230.25	4902130835.7343	1340390069.84579	5405234230.25	4704395730.5	1027165022.5625
High	G1LX99	0.000	309.313	49	41	199	5	870	97.9	7.44	452.20	33	2096778898.65625	1824107744.70395	3182757986.41856	2096778898.65625	1750529509.25	2439004699.0625
High	D2GW30	0.000	309.244	28	45	119	45	1827	199.2	7.47	272.60	0	1659681226.92285	786464089.873093	787937746.055563	1659681226.92285	754740832.215332	603810868.875
High	G1M1S4	0.000	309.163	34	48	140	40	1694	190.4	6.04	289.73	0	324581822.1875	316391201.429871	866175025.650276	324581822.1875	303629068.0625	663765503.625
High	G1LPP7	0.000	309.121	51	40	152	40	845	95.1	5.82	427.59	0	1606717175.76563	1455923660.76099	2338147015.34944	1606717175.76563	1397196705.5	1791764118.375
High	D2HG17	0.000	308.898	68	24	731	23	417	48.2	4.45	2120.04	1	14602968801.5547	15691146941.0225	8577991790.61631	14602968801.5547	15058220016.875	6573469417.125
High	G1LWF4	0.000	308.853	73	29	169	1	502	56.7	7.93	475.75	28	2550744105.75	2906138738.01337	194714431.037546	2550744105.75	2788915092.125	149213171.1875
High	G1LUT8	0.000	308.764	37	31	110	31	1156	127.2	5.14	288.88	0	711902702.125	551638076.572495	603267957.776989	711902702.125	529386893	462295088.125
High	D2H8U8	0.000	308.755	51	29	141	1	1003	96.0	8.84	383.69	0			7996115.30640394			6127567
High	G1MH82	0.000	308.613	38	44	126	44	1312	153.7	6.87	310.15	0	659240988.125	915930779.586688	872619345.856807	659240988.125	878985280.75	668703902.125
High	D2HAD2	0.000	308.335	59	33	138	33	597	66.2	9.23	341.97	0	1071176099.125	1642810699.33352	2658262665.05745	1071176099.125	1576545363.42188	2037074499.25
High	D2HLE5	0.000	308.072	33	33	115	32	1530	166.8	5.21	301.45	1	530578770	506528512.460092	2459176952.14168	530578770	486096893.625	1884511536.125
High	G1LUR6	0.000	308.068	40	36	150	34	1026	114.1	5.63	371.55	2	1319445702.75	1175509973.50595	1302453296.471	1319445702.75	1128093942.375	998093390.6875
High	D2H0A8	0.000	307.761	67	34	142	34	590	65.2	6.60	359.91	0	1807722928.0625	1470587338.02826	1086924570.22391	1807722928.0625	1411268900.4375	832929850.65625
High	D2HHK5	0.000	307.748	65	29	170	29	439	49.2	5.29	460.38	0	3171422891.23438	3093618267.84972	2089163642.37908	3171422891.23438	2968832342.25	1600963680.75
High	G1M1T0	0.000	307.590	53	36	140	36	950	108.3	7.47	370.36	0	884343887.5	927667202.019848	711184278.277988	884343887.5	890248296.25	544993305.8125
High	G1LJD7	0.000	307.399	63	36	182	36	737	82.8	7.15	466.03	0	2938855487.375	3560627645.27008	2278296803.79373	2938855487.375	3417004166.88281	1745899824.625
High	G1LVG7	0.000	307.361	46	35	136	35	855	97.9	6.90	370.15	0	1066353419.75	1270273783.57242	926250565.418318	1066353419.75	1219035306.125	709802470.4375
High	D2GZ99	0.000	307.140	57	33	125	33	787	90.4	7.84	391.28	0	1063373486.125	1858828627.63187	1209712265.85568	1063373486.125	1783849871.125	927024270.625
High	G1LG13	0.000	306.459	18	41	53	40	4011	441.4	5.41	143.26	0	50219612.875	37504204.2932107	499574934.731751	50219612.875	35991413.625	382833259.25
High	G1M663	0.000	306.211	59	22	164	21	395	45.7	7.96	480.16	1	1776408251.8125	1931513183.52072	1132085503.5013	1776408251.8125	1853602581.90625	867537486.21875
High	D2GTW0	0.000	306.033	59	40	163	40	819	93.4	5.72	398.42	0	1978703635.5	2262799554.80161	1538219488.35892	1978703635.5	2171525999.875	1178765264.6875
High	G1L171	0.000	305.911	50	34	186	34	792	89.2	6.64	490.94	0	2551916468.0625	2296192510.52373	711319427.705524	2551916468.0625	2203571998.5625	545096873.25
High	D2I199	0.000	305.732	59	19	473	1	405	44.0	8.40	1563.61	0	3664961		6566787.64350728	3664961		5032247.5
High	D2HDH1	0.000	305.650	41	45	121	1	1397	156.2	6.04	282.69	0	27829585	11916029.1506884	25141311.1541231	27829585	11435377.5	19266239
High	D2HQN6	0.000	305.352	42	35	109	30	1001	113.6	6.48	272.11	4	633769318.375	599022861.912398	482076215.928873	633769318.375	574860339	369423676.25
High	D2HJQ6	0.000	305.327	75	22	216	22	354	39.1	4.91	630.77	0	3535110937.25	4217562633.28084	3648418122.63772	3535110937.25	4047440655.90625	2795848438.125
High	G1M7U8	0.000	304.974	48	43	177	43	957	107.6	7.94	417.16	0	2201235027.15625	2245553831.68125	1925520339.82186	2201235027.15625	2154975909.9375	1475560874.25
High	G1LLT6	0.000	304.957	15	39	114	1	3400	370.0	4.50	285.66	30	115661161.5	64147250.2348039	5221662065.45481	115661161.5	61559770.6875	4001453572.3125
High	G1L699	0.000	304.564	60	25	207	25	475	51.3	9.35	590.96	0	5088087953.6875	3711352087.24311	4228963013.5414	5088087953.6875	3561648903.03125	3240730431.34375
High	G1L8U2	0.000	304.472	73	31	86	31	494	55.0	7.17	257.00	0	332640145.625	216079220.277971	2774888159.04758	332640145.625	207363327.375	2126446713.25
High	G1MDJ2	0.000	304.204	65	35	208	35	649	69.4	8.63	528.89	0	4802790512.9375	4305659275.10733	2022340204.20213	4802790512.9375	4131983782.0625	1549755678
High	D2GXF1	0.000	303.819	59	35	152	2	680	77.4	5.82	351.93	29	943988244.375	1003646725.86998	1203897802.81294	943988244.375	963163067.3125	922568543
High	G1LL39	0.000	303.744	64	26	170	26	485	54.1	6.58	473.13	0	3730229913.125	2451647353.36322	296603294.670287	3730229913.125	2352756327.46875	227292440.25
High	G1M1X6	0.000	303.496	43	32	106	29	964	108.2	5.60	300.67	0	429912506.097656	348584805.491673	247293359.302543	429912506.097656	334524092.8125	189505349.75
High	D2H0Y3	0.000	303.435	72	21	213	1	501	54.4	9.04	678.18	0		13553155.7078458			13006468
High	G1LEP7	0.000	302.607	57	35	120	27	858	97.1	9.19	314.90	8	737788227	570512992.544088	656654569.760139	737788227	547500459.75	503206209.25
High	G1M441	0.000	302.336	45	25	104	25	845	96.0	6.73	318.83	0	829809697.5	885916426.778569	601876024.267587	829809697.5	850181603.75	461228424.4375
High	G1LYP1	0.000	302.118	45	35	90	33	1013	113.8	5.47	261.91	0	143979548.96875	169997981.656313	532292140.770147	143979548.96875	163140847.5	407905042.78125
High	G1L850	0.000	302.030	32	47	113	47	1955	216.0	6.28	271.03	0	4336700371.375	540363976.900119	521942366.56162	4336700371.375	518567551.75	399973824.625
High	G1MFA0	0.000	302.010	37	34	89	34	1371	148.3	7.64	228.08	0	348091848.25	318067433.558858	335369343.077462	348091848.25	305237686.75	256999560.5
High	D2HU49	0.000	301.714	66	22	2002	1	258	28.6	7.40	4873.90	22	212645175786.31	70837382857.2005	142050362205.283	212645175786.31	67980046359.4297	108855747876.727
High	G1LLJ2	0.000	301.709	50	24	124	24	636	72.6	6.37	397.18	0	1640560226.75	1566568960.19836	1191234168.37327	1640560226.75	1503378953.9375	912864172.125
High	D2HT73	0.000	301.701	29	42	102	41	2163	234.4	8.31	268.79	1	227956751.4375	539934710.650346	362460792.697988	227956751.4375	518155600.625	277760225.6875
High	G1MFD2	0.000	301.561	45	38	149	32	917	102.4	6.00	362.88	1	1387042491.625	1125237179.18732	669557412.338828	1387042491.625	1079848979.75	513093889.625
High	G1ME45	0.000	301.513	66	21	214	1	540	58.8	9.01	685.82	19	5297262801.82813	5505129409.58928	2088858490.1728	5297262801.82813	5283071414.89063	1600729837.125
High	D2I225	0.000	301.211	58	31	116	29	720	80.2	8.53	321.57	2	870986472	873188829.119277	511617306.024867	870986472	837967393.625	392061545
High	D2H9I5	0.000	301.199	51	30	76	30	711	76.8	6.33	219.76	0	143683635.625	179525223.853536	2537925164.21574	143683635.625	172283793.5	1944857707.625
High	D2HY16	0.000	300.864	15	39	114	1	3371	366.7	4.49	286.35	0			289196282.721216			221616313.75
High	G1M611	0.000	300.836	64	26	273	26	509	54.7	8.91	902.43	0	3895395186.64063	3213381072.63986	1997572577.18328	3895395186.64063	3083764327.21875	1530775799.875
High	G1M782	0.000	300.606	72	30	233	26	498	54.9	7.30	580.07	2	7219844031.25	5928517393.69261	2259424422.12784	7219844031.25	5689381383.25	1731437579.0625
High	D2HI84	0.000	300.498	58	28	105	1	579	64.9	6.87	304.28	0	139527333.375	96696702.945246	33929125.2185477	139527333.375	92796290.375	26000499
High	G1LMQ1	0.000	300.317	51	38	138	38	748	87.2	6.92	336.85	0	1272586470.28125	1044435066.29964	705935197.614126	1272586470.28125	1002306146.3125	540970840.875
High	G1LYL6	0.000	300.242	52	21	291	21	456	49.9	5.24	896.75	0	12110868778.9531	14469843572.4194	11253886691.3818	12110868778.9531	13886179827.5313	8624055815.78125
High	G1LTU3	0.000	300.059	55	38	108	38	908	99.4	5.12	308.15	0	448174328.25	839420114.057182	567564052.431475	448174328.25	805560792.4375	434934543.1875
High	P18983	0.000	300.028	97	22	2003	1	147	16.1	8.05	4875.67	0	6707064.5	26938560.9381237		6707064.5	25851952
High	G1MC67	0.000	299.981	25	53	131	44	2695	307.0	6.06	263.99	0	111009262.4375	176512099.136034	359164172.562031	111009262.4375	169392207.875	275233966.375
High	G1L6D9	0.000	299.884	59	36	145	28	632	71.0	5.62	371.46	9	910924894.375	673199887.361199	4916017111.4622	910924894.375	646045318.25	3767232345.875
High	D2H6C5	0.000	299.714	34	47	112	46	1895	211.0	7.24	272.98	1	347413491.75	307888036.879313	303164148.337865	347413491.75	295468891.9375	232320140.4375
High	G1MBP9	0.000	299.636	30	46	143	2	1758	197.1	6.87	343.06	39	786337064.625	950669729.753662	527323286.689776	786337064.625	912322981.09375	404097320.515625
High	D2I1F1	0.000	299.611	74	25	419	23	334	36.6	6.05	928.25	1	22627479981.8457	19160538384.8543	20795400885.8263	22627479981.8457	18387668137.0313	15935889783.5938
High	G1LKI3	0.000	299.312	63	25	176	25	571	64.0	6.49	467.48	0	1262370350.1875	1856318633.0806	529061556.251242	1262370350.1875	1781441121.125	405429387.75
High	G1LPP2	0.000	299.100	67	35	168	29	676	74.6	8.12	404.99	6	1659949270.5	2547161414.7708	1322014900.42477	1659949270.5	2444417680	1013083799.6875
High	G1LD33	0.000	298.707	73	26	143	26	475	52.9	6.02	440.31	0	2209320389.5625	3282520588.61848	1596266523.2045	2209320389.5625	3150114992.8125	1223247751.6875
High	G1LGF4	0.000	298.099	44	43	125	41	1259	138.9	6.61	281.20	2	758080744.367188	803632599.957181	517175895.890143	758080744.367188	771216823.625	396321192.40625
High	G1MEX0	0.000	297.787	40	43	117	2	1346	151.4	6.23	279.50	33	427187192.5	441718355.66615	795344106.838921	427187192.5	423900955.75	609486496.375
High	G1LPK5	0.000	297.684	55	28	98	1	604	67.5	7.11	285.60	22	1067013434.125	1270760242.65963	486380070.592478	1067013434.125	1219502143.125	372721797.5
High	G1M0Z3	0.000	297.668	24	30	148	30	1655	175.6	5.43	391.99	0	1174415360.75	1239906932.83465	1920521459.79637	1174415360.75	1189893349.75	1471730142.5625
High	G1LR26	0.000	297.489	47	40	99	40	1019	116.1	5.63	256.82	0	1081572833.5	1097865384.52776	205583909.98948	1081572833.5	1053581269.1875	157542648.4375
High	G1LZ89	0.000	297.110	21	59	98	51	3387	387.6	6.19	199.89	3	311643860.125	208503562.799074	169423909.142362	311643860.125	200093245.875	129832589.3125
High	G1M1D6	0.000	297.046	63	29	95	29	627	72.4	7.11	276.67	0	540741506.875	694832787.299538	402693121.688274	540741506.875	666805621.375	308590983.125
High	G1MG28	0.000	296.922	35	42	109	42	1519	162.2	6.80	298.55	0	372187518.875	449383275.428701	690742565.384675	372187518.875	431256699	529328453.5
High	G1LUD2	0.000	296.822	40	45	119	1	1400	156.4	6.04	272.17	39	483362059.3125	458157920.18235	463116828.606104	483362059.3125	439677404.75	354894756.6875
High	D2H1J6	0.000	296.531	44	38	94	23	1204	134.1	5.41	270.47	14	548773713.09375	559648335.032772	351286835.62352	548773713.09375	537074045.171875	269197421.375
High	G1LPH9	0.000	296.374	57	30	125	30	672	74.6	9.28	363.16	0	1118743786.625	1178451120.25464	1079722339.73767	1118743786.625	1130916453.375	827410651.875
High	G1L9U0	0.000	296.352	50	34	149	1	734	82.9	5.49	345.97	0
High	G1LC54	0.000	296.227	55	39	202	39	744	82.6	7.11	480.22	0	2526037674.125	2632412677.04951	1439654640.71843	2526037674.125	2526230199.4375	1103233248.875
High	G1LLH7	0.000	295.917	76	21	140	21	503	54.8	6.44	452.96	0	5970600007	2634221931.66062	3190742489.78627	5970600007	2527966474.9375	2445123367.625
High	G1M1R0	0.000	295.910	23	49	91	49	2644	301.3	7.50	194.62	0	185695981.875	682058696.778017	185081608.671157	185695981.875	654546793.75	141831366.125
High	G1LJM6	0.000	295.667	45	34	111	34	926	105.0	6.43	289.43	0	603610094.125	378116016.781917	1190439662.76805	603610094.125	362864116.5625	912255328.1875
High	G1M3R6	0.000	295.228	61	31	156	23	634	71.0	5.38	430.66	1	775560235.9375	361315957.522078	2061108610.71981	775560235.9375	346741713.9375	1579464605.3125
High	G1MH21	0.000	294.999	51	37	172	37	747	85.0	5.73	431.48	0	1516731125.1875	1700180838.2103	2153262215.15361	1516731125.1875	1631601388.125	1650083570.125
High	D2HVV0	0.000	294.998	39	46	124	44	1233	143.1	7.64	283.51	0	536503148.625	673091336.088541	2246095121.54834	536503148.625	645941145.5625	1721223096.25
High	G1MAY6	0.000	294.711	63	30	230	29	465	52.5	6.99	633.10	1	4109902294.82813	4546454356.17833	3100487496.41696	4109902294.82813	4363066017.375	2375959342.625
High	G1M4F8	0.000	294.447	25	41	192	1	1964	224.3	5.67	465.76	0	2854175.75		7495352.56091572	2854175.75		5743823.5
High	D2GWC0	0.000	294.347	46	27	308	21	633	70.9	8.13	704.09	0	2646390661.5	5120019760.32531	5188612995.18386	2646390661.5	4913495764.9375	3976127475.25
High	G1MAL1	0.000	294.288	23	42	112	41	2165	244.3	5.34	267.55	1	1563569147	386632486.452788	864110945.499385	1563569147	371037061.125	662183761.875
High	G1LR67	0.000	294.260	60	27	252	26	520	60.2	9.22	630.27	1	7850400566.125	8640692315.25833	4073039743.40549	7850400566.125	8292156492.46875	3121243624.5625
High	G1L7R3	0.000	294.077	56	32	95	32	627	70.1	8.18	256.12	0	224421451.5625	1509546604.20302	1423696050.84012	224421451.5625	1448656683.75	1091003894.375
High	D2HCQ9	0.000	293.483	74	29	166	1	485	54.7	7.50	462.56	0	3290867.5			3290867.5
High	D2I0V1	0.000	292.905	21	38	79	38	2482	281.1	6.76	214.63	0	293910392.25	357284069.97694	289363325.240597	293910392.25	342872458.875	221744321.4375
High	G1LF63	0.000	292.788	31	38	114	4	1494	171.9	6.27	299.13	26	333038464.125	422497595.595035	363064489.907237	333038464.125	405455495.0625	278222849.71875
High	D2HGC3	0.000	292.567	54	18	656	10	472	51.1	6.80	2195.82	9	9528747023.97949	10532199097.6716	16841853576.2841	9528747023.97949	10107366393.9531	12906215360.6289
High	G1L5D1	0.000	292.379	48	24	85	24	928	100.1	5.38	316.47	0	343306840.375	251426276.444139	462539197.130553	343306840.375	241284604.8125	354452107.296875
High	G1MHJ2	0.000	292.203	57	30	114	2	776	88.2	7.11	331.80	25	1130710179.125	1076956055.6214	318185050.617192	1130710179.125	1033515350.72656	243830928.0625
High	G1MEJ2	0.000	291.986	40	34	136	34	975	110.4	6.46	345.87	0	912336656.5625	670964099.033827	491130075.514509	912336656.5625	643899713.9375	376361811.71875
High	D2I4E9	0.000	291.754	72	22	156	1	394	44.4	5.36	452.21	20	3483614441.5	4080296271.61816	1250079188.69474	3483614441.5	3915711147.375	957958169.75
High	D2HZW5	0.000	291.707	58	28	288	28	533	56.4	6.71	837.01	0	6389786825.98438	4986757839.1829	6405199160.50338	6389786825.98438	4785609171.5625	4908419338.6875
High	D2HKI5	0.000	291.617	27	44	100	44	2085	234.6	6.21	257.50	0	522148084.625	553911763.212511	222824145.609934	522148084.625	531568866.9375	170754151.125
High	D2H3N7	0.000	291.330	35	37	102	37	1518	166.7	4.87	282.89	0	400149337.1875	449900033.940542	406874112.212745	400149337.1875	431752613.25	311794951.375
High	D2HCZ2	0.000	291.323	45	35	84	34	1151	130.1	6.84	252.27	0	310673054.3125	375929336.035539	104311223.168306	310673054.3125	360765639	79935566.75
High	D2HEV9	0.000	291.188	40	33	71	1	1359	149.8	6.67	250.69	0	1747719.25	1489543.6969406	1934246.32022103	1747719.25	1429460.625	1482247.75
High	G1LA32	0.000	290.908	73	22	160	1	382	43.4	5.44	460.78	0	465660413	270964724.715078	18582436.674718	465660413	260034939.25	14240055.5
High	G1LY63	0.000	290.765	56	31	144	31	712	80.8	6.00	370.89	0	1604190079.875	650626125.343605	1350584315.31757	1604190079.875	624382104.1875	1034977056.25
High	D2HB61	0.000	290.471	28	36	138	20	1561	178.4	7.58	339.79	15	802110095.875	946729056.967053	1404508339.07821	802110095.875	908541261.5	1076300005.6875
High	G1M2A9	0.000	290.244	46	34	100	33	820	91.0	8.38	268.33	0	921246762.3125	1081616585.003	740175923.406434	921246762.3125	1037987890.375	567210125
High	G1L2W9	0.000	289.633	40	40	116	40	1102	125.8	6.44	289.95	0	756704105.375	756024608.890607	687872909.729876	756704105.375	725529175.25	527129384.75
High	D2HB75	0.000	289.339	41	31	90	31	1198	131.6	6.60	267.15	0	419301894.25	557169863.593598	410394406.058571	419301894.25	534695546.75	314492615.875
High	G1LXH4	0.000	289.270	34	42	116	42	1449	166.7	8.47	289.59	0	160920594.625	621108933.747109	998448712.753316	160920594.625	596055534.625	765129209.5
High	G1LCK2	0.000	289.201	23	39	137	32	2388	251.1	6.55	342.17	7	1079292234.5625	1052479803.79113	588576747.288387	1079292234.5625	1010026386.75	451036949.25
High	G1LDF6	0.000	289.011	48	39	151	27	957	109.2	6.14	366.48	1	466165386.5	471545120.768616	98292279.9818302	466165386.5	452524611.6875	75323142.3125
High	G1L9F0	0.000	288.915	48	37	83	37	980	109.3	6.09	192.04	0	170602382.9375	151000192.138275	1040827233.77679	170602382.9375	144909363.5	797604632.5
High	G1M054	0.000	288.490	43	32	223	31	992	111.8	7.20	609.11	1	8151845057	5922696170.8896	3355313063.28926	8151845057	5683794968.5625	2571236758.53125
High	G1LT60	0.000	288.468	44	27	121	27	796	91.2	7.11	298.02	0	921984666.6875	2580172321.38273	872051179.304083	921984666.6875	2476097040.125	668268505.875
High	G1LVD8	0.000	288.424	65	21	168	21	457	49.8	4.96	612.68	0	3248005682.64063	3152715243.18518	2563800358.94783	3248005682.64063	3025545548.76563	1964686334.8125
High	D2GV79	0.000	288.266	27	38	94	1	1688	188.6	6.07	232.76	0	2962514.25	8084450.95872891		2962514.25	7758352
High	G1LH03	0.000	287.983	50	35	166	35	822	93.0	5.43	456.13	0	1847695997.3125	2260667056.91815	3080254880.38662	1847695997.3125	2169479519.625	2360454725
High	D2HIU3	0.000	287.786	74	21	101	2	451	51.1	6.14	365.77	17	728358061.242188	770688548.29405	463810044.585304	728358061.242188	739601621.75	355425980.5625
High	G1LHM6	0.000	287.333	70	30	191	30	475	53.2	5.53	446.66	0	3650293483.625	4186760979.65984	1428281589.64549	3650293483.625	4017881435.10156	1094517875.25
High	G1M475	0.000	287.300	39	36	119	36	1036	115.2	6.60	313.76	0	670813179.125	839117115.838183	340599299.581753	670813179.125	805270016.125	261007370.25
High	G1MFS6	0.000	287.093	49	29	120	29	832	91.4	8.82	316.32	0	1160266325.125	1134616319.26676	1668807354.48902	1160266325.125	1088849797.5625	1278837095.625
High	D2HSS4	0.000	286.952	57	35	173	35	729	81.5	8.38	415.22	0	1750734868.59375	1706161100.29885	2652506644.58607	1750734868.59375	1637340427	2032663557.21875
High	G1MFU2	0.000	286.616	73	21	160	20	283	31.3	6.19	423.83	1	3138061865.5625	2568340411.82733	1200577141.58012	3138061865.5625	2464742389.125	920023860.5625
High	G1MEB0	0.000	286.581	65	24	170	24	390	43.4	8.16	503.07	0	3227460945.53906	3202634048.21472	1231474555.94705	3227460945.53906	3073450800.8125	943701105
High	G1L043	0.000	286.479	43	48	147	35	934	106.3	8.32	337.83	12	1328624762	2028049086.69996	1788141167.06265	1328624762	1946244558.625	1370284742.875
High	G1LM07	0.000	286.253	49	30	78	29	937	105.3	4.87	279.24	1	349377270.5	402150125.802179	146671344.600872	349377270.5	385928772.25	112396889.8125
High	G1LLR4	0.000	285.680	53	32	104	32	794	89.7	6.47	282.00	0	1035608115.9375	815526746.957136	372968709.848502	1035608115.9375	782631201.625	285812631.625
High	G1LLT4	0.000	285.185	77	26	235	25	411	46.8	7.72	594.68	1	4286077281.46875	4570433675.15666	2828848223.24823	4286077281.46875	4386078093.0625	2167797281.125
High	G1LZZ1	0.000	285.159	40	38	114	38	1182	130.7	7.93	309.27	0	518965614.25	514692899.516182	727970576.525087	518965614.25	493931957.375	557856948.125
High	G1MDX2	0.000	285.113	57	27	135	27	599	67.3	8.34	384.16	0	1884243253.65234	1700010894.84154	1382715108.54293	1884243253.65234	1631438299.6875	1059599461.09375
High	D2HGX7	0.000	285.104	48	38	178	2	844	95.2	7.27	397.61	0	62926236	99713041.2893988	18175585.3355254	62926236	95690960	13928278
High	G1LT06	0.000	285.024	20	47	89	41	3035	342.3	6.43	221.87	5	132057310.5	119380814.912964	327391537.72881	132057310.5	114565403.25	250886024.75
High	G1LSJ8	0.000	284.890	34	27	92	27	1228	131.5	4.77	253.98	0	401791548.375	263602424.197517	1634443033.46421	401791548.375	252969608.625	1252503098.25
High	G1MB21	0.000	284.603	31	47	98	47	1753	200.0	5.99	216.91	0	297692852	402066115.359744	264890488.215323	297692852	385848150.5	202990346.1875
High	D2H9K1	0.000	284.530	37	30	127	27	1047	114.3	6.98	319.67	0	585867733.5	673741626.961779	2129288802.16716	585867733.5	646565205.9375	1631712312.5
High	D2HUB7	0.000	284.117	47	38	99	38	982	108.6	7.02	271.87	0	363522268.078125	439664998.028121	261118247.597313	363522268.078125	421930423.5	200099610.34375
High	G1LU77	0.000	283.801	54	30	111	30	618	70.2	8.57	346.40	0	892481719.625	854455655.158099	525812434.266223	892481719.625	819989851.5	402939527.125
High	D2H3D7	0.000	283.594	48	41	117	41	1019	118.1	6.47	283.22	0	459417758.375	726746348.651149	357457741.59072	459417758.375	697431899.375	273926297.625
High	G1L7L7	0.000	283.388	42	29	94	2	955	103.6	4.79	267.35	22	775314734	730282899.843184	231387444.318123	775314734	700825798.25	177316360.96875
High	G1LW91	0.000	283.141	50	32	190	30	708	80.5	6.99	504.67	1	1235567445.28125	2009416544.69859	1059969062.37497	1235567445.28125	1928363589.3125	812273360.09375
High	G1LX50	0.000	282.690	78	25	123	25	441	51.4	6.07	405.98	0	1921533381.75	1586221587.17058	255377092.079409	1921533381.75	1522238861.5	195700059.59375
High	D2GX05	0.000	282.619	42	36	122	1	811	93.2	5.43	298.73	0
High	D2HLP9	0.000	282.614	29	46	90	45	2108	230.2	7.18	213.63	1	502807699.25	485326404.176102	165417768.805026	502807699.25	465750005.5	126762611.90625
High	G1LXP6	0.000	282.385	52	30	469	30	554	60.4	5.92	1206.17	0	24712413941.127	23782254977.7636	10606369112.575	24712413941.127	22822960571.2461	8127851447.0625
High	G1LEW3	0.000	282.066	41	32	117	32	967	108.9	5.62	294.29	0	1012185742.125	1523650202.69287	506708066.047311	1012185742.125	1462191391.5625	388299506.09375
High	D2HDU4	0.000	282.002	48	19	90	19	359	40.6	4.51	318.68	0	1451404379.75	1609348830.14469	342975818.078725	1451404379.75	1544433231	262828539.125
High	D2GXH8	0.000	281.969	47	41	201	36	920	102.8	6.92	464.95	5	2376631543.3125	1825176094.38217	4081497063.3034	2376631543.3125	1751554765.375	3127724620.9375
High	G1LD72	0.000	281.799	39	42	149	42	1271	147.8	5.67	337.17	0	972897752	1197373034.40885	450587571.639623	972897752	1149075122.5625	345293361.6875
High	G1LQK7	0.000	281.714	54	21	283	19	215	24.7	6.83	704.70	3	5693578498.71875	5685527213.81982	6276976808.38175	5693578498.71875	5456192591.875	4810160243.6875
High	D2HU05	0.000	281.677	76	24	181	24	442	47.1	8.88	519.40	0	6468792821.30859	5928900155.87832	3904624157.19338	6468792821.30859	5689748706.125	2992183731.25
High	G1M5P7	0.000	281.485	46	40	113	40	1043	117.9	6.47	259.62	0	550105257.375	698314691.989546	1388585066.70242	550105257.375	670147078	1064097715.625
High	D2H6C4	0.000	281.421	42	28	93	1	841	92.6	4.78	258.50	0	20188301.5			20188301.5
High	G1M6A6	0.000	281.259	49	33	122	33	630	67.8	4.88	312.40	0	1447609643.125	1741597633.21188	962490934.256789	1447609643.125	1671347572	737574117
High	G1L5C3	0.000	280.977	44	23	86	23	834	93.5	6.13	299.78	0	415981623.625	534636893.155589	379561599.091204	415981623.625	513071478.875	290864881.25
High	G1MD89	0.000	280.665	47	39	152	38	963	109.7	5.53	360.33	0	1673988996.21875	1564424289.55773	2582132419.65308	1673988996.21875	1501320791.9375	1978734522.70313
High	G1LPJ2	0.000	280.660	30	43	107	43	1689	192.8	6.86	249.83	0	295519085.5625	404393822.240562	599317331.64116	295519085.5625	388081965.6875	459267652.25
High	D2HUC9	0.000	280.599	22	41	96	41	2480	275.0	5.31	252.39	0	308421605.625	527823063.048855	159132536.073314	308421605.625	506532495.25	121946125
High	D2GUG6	0.000	280.458	55	21	101	17	552	60.3	5.88	297.01	0	1211570884.8125	858146124.113568	94393711.6249935	1211570884.8125	823531459.625	72335599.25
High	G1MCT9	0.000	280.371	40	43	98	39	1331	147.3	7.52	238.48	3	527972201.09375	512724363.151728	489738702.925974	527972201.09375	492042825	375295577.875
High	G1L4F9	0.000	280.010	31	28	113	23	1216	132.5	6.60	331.06	5	506669912.3125	459106376.2651	400244323.307745	506669912.3125	440587603.375	306714424.875
High	D2HL97	0.000	279.973	57	27	100	23	650	71.0	5.86	286.85	0	507517040.3125	802257357.66079	262112370.727151	507517040.3125	769897053.875	200861424.78125
High	G1MJI1	0.000	279.919	63	27	198	27	445	50.4	6.00	484.74	0	5911294209.125	3831131160.49716	6998450420.18708	5911294209.125	3676596500.25	5363038450.875
High	D2I1W1	0.000	279.827	53	39	143	39	773	90.2	7.94	376.86	0	1790760644.375	1593699441.22038	1052633363.30716	1790760644.375	1529415084.625	806651881.9375
High	D2H0E6	0.000	279.755	86	19	231	14	356	37.5	7.09	701.41	7	5838470629.23438	6789994567.55173	8554342276.8906	5838470629.23438	6516109529.52539	6555346369.33008
High	G1L8P5	0.000	279.622	71	25	223	8	314	35.2	6.70	551.54	20	4322228940.375	3313758795.42707	4741981839.6231	4322228940.375	3180093157.75	3633865986.375
High	G1LZI0	0.000	279.570	40	36	123	1	845	97.0	5.44	298.73	31	2139023613.78125	2479625049.08229	366177429.766791	2139023613.78125	2379605499.125	280608351.53125
High	D2H4G8	0.000	279.210	49	25	92	24	769	83.9	6.19	301.43	1	996223247	1172263035.95766	1986055788.29313	996223247	1124977975.125	1521950277.375
High	D2H8I0	0.000	278.994	47	34	91	33	894	101.9	6.67	242.90	1	581179893.25	472467239.102106	281438101.278638	581179893.25	453409534.9375	215671079.75
High	G1LEI1	0.000	278.809	87	29	159	28	406	46.2	5.83	409.71	1	3007815875.75	3297520477.76721	1295837833.70105	3007815875.75	3164509838	993023842.5625
High	D2GWQ1	0.000	278.276	46	35	192	35	796	91.7	5.49	458.77	0	4398913099.14844	4774169996.08903	2946972773.86922	4398913099.14844	4581596391.21875	2258318249.1875
High	D2H476	0.000	278.149	40	42	112	1	1289	145.0	6.10	265.50	0	22730826	29846722.1642287	36582202.7002896	22730826	28642808	28033600
High	G1M6A9	0.000	278.111	43	41	175	21	1021	112.3	5.59	430.10	5	1923109621	1211643736.60003	417215105.430419	1923109621	1162770193.6875	319719440.5
High	D2HIR8	0.000	278.102	67	28	164	27	578	63.7	5.54	410.59	1	766137515.625	756479732.708274	5839603318.75207	766137515.625	725965940.9375	4474993070.75
High	D2HJ17	0.000	278.100	60	20	179	20	543	61.4	4.98	549.61	0	5899213273.75	5608888710.73142	48832692.1096133	5899213273.75	5382645422.53125	37421370.40625
High	G1LGJ8	0.000	278.005	65	29	180	29	427	47.9	6.48	432.34	0	4470985804.39844	7269182342.42165	3266305808.75398	4470985804.39844	6975968516.92188	2503028898.24512
High	D2HNM4	0.000	277.451	69	22	140	22	427	46.5	8.31	391.21	0	1086724306.625	1386316932.64469	3488555723.02126	1086724306.625	1330397673.5	2673343005.5625
High	G1L854	0.000	277.410	50	39	132	39	777	89.7	7.90	317.90	0	1362627137.5	1440655265.43359	1006199922.05759	1362627137.5	1382544184.75	771069100.625
High	D2HJ05	0.000	277.008	86	20	425	20	263	28.1	7.30	1286.67	0	15379126865.375	13481875366.4467	28033498750.1458	15379126865.375	12938062862.5234	21482574381.8828
High	G1LQW6	0.000	276.978	18	53	85	21	3498	398.3	6.13	186.69	25	389094920.875	223684684.430616	277263253.683824	389094920.875	214662013.25	212471818.9375
High	D2GZK9	0.000	276.929	51	21	145	21	403	46.0	10.18	360.71	0	2200292059.96875	5216811487.5515	4432870875.34751	2200292059.96875	5006383246.64063	3396988693.9082
High	D2HAZ6	0.000	276.749	33	40	113	35	1527	166.9	8.25	265.53	0	321741209.375	471465106.323475	448795481.139948	321741209.375	452447824.75	343920050.5
High	G1LFC4	0.000	276.598	52	33	123	31	755	85.0	7.06	316.25	2	1301298291.30078	1754254893.78524	186129898.446703	1301298291.30078	1683494282.19531	142634689.4375
High	G1M406	0.000	276.460	35	33	105	32	1029	115.1	5.40	292.29	1	525182396.25	1162614982.3953	713545959.021356	525182396.25	1115719090.875	546803104.25
High	D2HC27	0.000	276.208	58	36	134	6	678	78.8	6.92	359.05	30	2144232349.375	1303517932.24211	1375863715.76888	2144232349.375	1250938500.125	1054349115.5625
High	G1MGM6	0.000	276.187	47	29	85	29	836	92.2	6.55	240.89	0	566921736.5	541984093.978373	669215944.105253	566921736.5	520122318.875	512832216.375
High	G1LU83	0.000	275.929	63	23	166	23	456	51.0	5.64	457.82	0	2564933271.5	2784095823.98648	651990480.909779	2564933271.5	2671794969.6875	499632034.0625
High	G1M779	0.000	275.822	32	38	111	38	1402	157.1	6.64	259.30	0	373109200.625	405006950.671121	436558985.472656	373109200.625	388670362.625	334543003.75
High	D2HN54	0.000	275.784	56	23	104	23	584	64.8	8.95	310.72	0	1476301574.875	1782929769.49687	246235476.90343	1476301574.875	1711012512	188694675.4375
High	D2I2U8	0.000	275.575	47	16	100	16	318	35.5	8.12	416.07	0	983904280.1875	1298174767.04572	2648273366.0828	983904280.1875	1245810859.84375	2029419519.75
High	G1L192	0.000	275.535	51	23	94	23	456	51.0	6.16	274.03	0	735035321.75	798726439.302921	1562715950.93881	735035321.75	766508560.625	1197537344.625
High	D2I5P7	0.000	275.530	64	25	129	25	428	46.3	6.68	352.94	0	1581833248.90625	1384931421.64407	1474310040.1575	1581833248.90625	1329068049.25	1129790304.875
High	D2HY20	0.000	275.435	51	29	158	29	625	71.4	6.65	400.14	0	2922500786.8125	2988441374.74955	2324529266.95425	2922500786.8125	2867897923.4375	1781328592.8125
High	G1LQL2	0.000	275.347	46	22	282	22	594	67.6	4.60	787.60	0	6267158919.75	6803208174.4396	6274333394.94872	6267158919.75	6528790144.9375	4808134548.42188
High	G1L9W9	0.000	275.068	25	47	101	47	2487	276.3	6.43	224.18	0	225200693.125	159891937.450902	464063170.168063	225200693.125	153442446.375	355619955.25
High	G1LR55	0.000	274.951	65	24	82	24	461	48.8	7.39	250.12	0	771759404.25	800644451.31364	340920183.018638	771759404.25	768349206.625	261253269
High	D2HV66	0.000	274.925	29	38	78	37	1823	202.1	7.43	202.66	1	347180565.5625	236788622.62323	474717880.00339	347180565.5625	227237383.625	363784851.0625
High	D2HC77	0.000	274.860	78	26	853	26	266	30.2	5.48	2080.13	0	52940046911.8281	35046161174.0652	69585690948.3634	52940046911.8281	33632519514.9531	53324766738.4063
High	G1MFC1	0.000	274.481	57	27	137	23	490	54.2	6.38	391.85	0	1659650849.6875	1625865967.54368	1519743263.05949	1659650849.6875	1560284123.85938	1164606600.875
High	G1L3K9	0.000	274.297	44	33	97	33	1084	123.8	6.64	241.00	0	698772398.625	502530596.525432	393693584.1587	698772398.625	482260239.875	301694475.625
High	G1L963	0.000	273.950	44	29	93	29	914	101.8	8.41	264.41	0	447736157	583805912.225264	286685774.481738	447736157	560257188.75	219692466.125
High	G1MCB1	0.000	273.939	30	39	90	1	1884	207.8	5.62	238.21	31	178152949.0625	267276858.625262	216289735.436174	178152949.0625	256495829	165746715.0625
High	G1LWB6	0.000	273.748	57	32	108	29	856	91.0	5.43	282.49	3	388367105.75	639279379.434275	844940522.497095	388367105.75	613493047	647493121.875
High	D2I596	0.000	273.716	47	27	188	1	674	73.6	9.31	458.34	0		4979748.43224151	4202241.81993455		4778882.5	3220253.5
High	G1LTV4	0.000	273.683	54	42	99	40	982	112.4	5.22	240.21	2	760817408.25	644091635.291866	523402601.433203	760817408.25	618111193	401092828.875
High	D2HYH2	0.000	273.377	40	30	108	30	1078	123.9	5.26	294.11	0	864404338.9375	865591692.23501	499126809.974785	864404338.9375	830676699.125	382489853.1875
High	G1LZ52	0.000	273.376	62	25	111	25	757	79.8	8.44	361.46	0	306420522.25	353867975.077647	665930530.968382	306420522.25	339594157.5	510314545.1875
High	D2GXI7	0.000	273.108	33	33	137	33	1107	128.1	5.74	338.51	0	1647549541.54688	1229784267.59218	2736632164.03788	1647549541.54688	1180178998.02344	2097130456.09375
High	D2HKL2	0.000	272.929	19	65	103	64	4125	472.8	5.87	207.96	0	2027225891.625	1885575150.99699	2749990666.06388	2027225891.625	1809517531.6875	2107367316.5
High	G1M1U5	0.000	272.824	70	29	172	28	418	47.3	5.21	439.58	1	2481389592.9375	2679832368.8766	2393999528.27392	2481389592.9375	2571737143.91699	1834564903.75
High	G1LHY9	0.000	272.813	41	22	70	22	775	87.4	9.03	237.98	0	783299913.125	657642788.995755	144706005.444064	783299913.125	631115739.75	110890815.0625
High	G1M4R4	0.000	272.728	48	22	134	22	564	62.7	9.10	341.87	0	6378178158.5625	2697502958.54853	1088486701.47844	6378178158.5625	2588694962.75	834126939.9375
High	D2HAJ4	0.000	272.350	30	39	91	1	1817	201.4	5.82	240.13	0	33958816		6876762.0972779	33958816		5269786.5
High	D2HBG8	0.000	272.029	53	27	138	27	536	61.0	6.62	403.52	0	2832622306.125	2272146976.11117	2369041866.40385	2832622306.125	2180496378.34375	1815439398.5
High	G1LET8	0.000	272.024	69	21	173	8	327	37.2	6.19	492.60	0	839405061.125	452371238.004406	694966325.849924	839405061.125	434124137.4375	532565197.125
High	G1M1Y8	0.000	272.011	38	25	76	15	928	103.4	5.24	226.72	7	432553143.25	503366668.025474	3325064975.68812	432553143.25	483062587.125	2548057104.875
High	G1M2K5	0.000	271.688	63	22	104	22	579	65.7	9.72	333.76	0	1774035428.25	1793745339.27464	517099272.060863	1774035428.25	1721391818.875	396262474.1875
High	D2H110	0.000	271.653	46	25	147	25	689	77.2	5.38	424.14	0	2739326766.09375	4216258408.00439	3108931543.43058	2739326766.09375	4046189038.59375	2382430167.75
High	G1LX92	0.000	271.625	66	24	107	24	476	53.6	5.92	304.42	0	1557403042.625	1227215044.96846	1064638504.24241	1557403042.625	1177713409.00781	815851637.394531
High	D2HYW7	0.000	271.549	46	23	79	23	725	80.4	7.69	252.80	0	566142162	559172740.610671	345517632.75737	566142162	536617634.59375	264776377.4375
High	G1LJK1	0.000	271.515	68	28	139	28	482	52.9	7.28	402.67	0	2729743893.375	2760046887.89306	2017917451.3607	2729743893.375	2648716085	1546366442.9375
High	G1M4D6	0.000	271.438	63	28	92	28	660	73.1	4.63	279.48	0	673703162.3125	904636217.597289	524104217.768186	673703162.3125	868146302.5625	401630490.09375
High	G1MEN6	0.000	271.383	19	53	81	41	3282	369.8	7.08	170.16	8	335224568	253472141.09065	574279634.784441	335224568	243247946.3125	440080814.75
High	G1M967	0.000	271.230	65	31	154	31	596	65.1	8.15	448.08	0	4028859778	1926812241.65566	2228038535.76826	4028859778	1849091259.875	1707386009.75
High	D2HPF6	0.000	271.027	74	21	106	21	324	35.8	8.65	332.72	0	2539429662.875	2089042605.89146	1174674032.03288	2539429662.875	2004777808.9375	900173841.75
High	D2H522	0.000	270.897	65	29	138	29	584	65.5	7.44	369.12	0	1751289820.36719	3013092082.23202	1161839673.4266	1751289820.36719	2891554306.125	890338641.875
High	G1M8E5	0.000	270.585	29	40	83	34	1716	194.5	7.66	243.01	4	166997195.25	179669926.27683	691426333.915027	166997195.25	172422659.125	529852437.625
High	G1LZK9	0.000	270.309	30	24	109	24	1076	117.1	7.94	298.99	0	1381948605.59766	3127409638.18516	258242258.20597	1381948605.59766	3001260684.875	197895687.9375
High	D2HMF7	0.000	270.125	54	35	154	35	679	77.3	5.92	383.09	0	1351851478.4375	1678605871.08237	977626549.930271	1351851478.4375	1610896681	749172811.5625
High	G1LW79	0.000	269.819	44	22	91	2	748	83.6	6.71	273.91	19	619587822	666598818.69452	1473875076.46767	619587822	639710514	1129456984.375
High	G1LK81	0.000	269.689	42	22	119	2	628	70.7	5.97	351.66	18	855604477.25	1014275659.96858	842056315.278634	855604477.25	973363266.75	645282902
High	D2HUV3	0.000	269.663	47	26	101	26	880	96.2	4.56	309.90	0	472579182.625	514153429.070509	285081580.034485	472579182.625	493414247.3125	218463143.0625
High	G1LZA0	0.000	269.587	52	22	76	22	607	66.8	6.87	231.92	0	363858592.9375	406534803.892579	390450901.202677	363858592.9375	390136587.5	299209549.34375
High	D2HHJ1	0.000	269.485	43	22	112	2	626	70.6	6.09	343.96	0	66182129.75	49025736.1544566	43931084.5706603	66182129.75	47048206.5	33665180.375
High	G1LTK7	0.000	268.819	45	25	97	25	794	88.1	7.11	304.49	0	1566738479	1300980840.43052	624053131.630816	1566738479	1248503745.875	478223140.75
High	G1LQ79	0.000	268.622	40	32	129	31	879	98.6	4.63	347.23	1	825850878.125	783882247.512879	475651360.063801	825850878.125	752263132.5	364500193.625
High	G1MFY0	0.000	268.546	38	38	73	37	1182	130.5	4.96	193.38	1	891191092.125	647199657.862522	2318701713.14808	891191092.125	621093848.625	1776862833.5
High	G1LIX5	0.000	268.476	53	23	62	23	564	62.2	6.65	202.02	0	954513066	700041115.738429	132234580.050959	954513066	671803863.75	101333737.4375
High	G1LPE4	0.000	268.381	44	35	85	34	1159	124.5	7.99	211.06	0	318669049.25	416680803.642288	407371601.676075	318669049.25	399873332.5	312176186.5
High	D2HXH4	0.000	268.356	33	27	129	27	721	83.1	5.59	321.70	0	3178371099.625	3255214215.20195	7060807495.77054	3178371099.625	3123910064.625	5410823799.625
High	G1LFQ1	0.000	268.350	34	38	86	38	1262	143.2	8.18	212.38	0	775475399	1242452040.47731	174796821.967134	775475399	1192335796.5	133949949.0625
High	D2HQF0	0.000	268.300	46	21	120	20	516	58.0	6.62	341.54	0	1734729720.3125	1966168136.14041	1167442868.91806	1734729720.3125	1886859672.875	894632471.375
High	D2GYQ9	0.000	268.101	13	48	83	48	4871	532.2	6.01	201.28	0	157954836.375	147961897.39861	117969470.74328	157954836.375	141993623.125	90402127.5625
High	D2HX35	0.000	267.771	48	31	114	31	890	99.0	5.71	298.60	0	552712691.90625	864707134.856308	944316215.402294	552712691.90625	829827821.75	723646503
High	D2HN93	0.000	267.431	52	27	109	27	584	65.5	4.79	328.14	0	1708030424.39844	2498934946.24669	107466062.328109	1708030424.39844	2398136501.42188	82353176.75
High	G1L518	0.000	267.360	68	20	219	20	299	33.0	6.33	649.75	0	4264704966.5625	4353128673.90055	4092837513.76163	4264704966.5625	4177538428.5	3136415012.125
High	D2GV13	0.000	267.209	41	32	120	31	1023	108.5	6.87	299.14	1	708938981.078125	801606332.545762	1342677616.05776	708938981.078125	769272288.875	1028918010.375
High	G1LM72	0.000	267.186	32	37	98	37	1414	160.1	6.77	253.87	0	687821232.25	823206703.501783	186097483.378334	687821232.25	790001375.125	142609849.1875
High	G1MDE1	0.000	266.922	25	58	110	58	2794	320.2	7.68	205.12	0	482880545.0625	257388654.463307	299289630.946514	482880545.0625	247006481	229351028.0625
High	G1L7I9	0.000	266.583	54	33	229	26	671	75.4	9.19	555.95	0	3639952202.8125	4279991375.72557	3707011733.21114	3639952202.8125	4107351237.5	2840749775.9375
High	D2H3D6	0.000	266.536	45	35	83	34	1030	115.7	5.59	237.12	0	256103842.5	420494646.059048	353860737.300133	256103842.5	403533337.625	271169848.53125
High	D2GYN1	0.000	266.385	48	30	101	6	900	101.6	7.74	261.62	21	511217408.5	871699006.288017	572271680.485517	511217408.5	836537665.125	438542083.25
High	G1M8R7	0.000	266.183	46	28	114	27	818	90.2	6.42	298.40	1	431768452.260742	715155038.811124	678994235.456614	431768452.260742	686308143.125	520325496.9375
High	G1LDU0	0.000	265.955	50	27	91	27	792	92.0	6.38	243.93	0	890631962.5	1775522626.826	872701969.522048	890631962.5	1703904148	668767218.125977
High	G1MCJ3	0.000	265.936	36	29	87	29	1047	116.9	6.70	248.17	0	208719911.875	288190236.127106	599440092.119019	208719911.875	276565632.75	459361725.8125
High	G1LTZ6	0.000	265.926	58	24	161	24	527	58.2	7.80	455.95	0	2228014036.375	1511337780.6663	3672023925.82758	2228014036.375	1450375610.3125	2813937989.75
High	G1L0H7	0.000	265.829	40	44	116	44	1164	134.8	7.28	254.18	0	310945592.375	545915584.672175	376528856.031016	310945592.375	523895226.75	288540835.6875
High	G1MJ08	0.000	265.811	20	36	103	36	2144	241.3	6.61	230.11	0	928461640.25	507131385.667713	624989244.848697	928461640.25	486675449	478940501.148438
High	G1MG33	0.000	265.257	43	21	106	21	527	59.2	6.32	295.58	0	1131841514.25	1135998621.395	553590359.43629	1131841514.25	1090176342.375	424226250.875
High	G1MIR3	0.000	265.219	35	28	94	28	1291	139.3	7.46	248.08	0	588227323.25	946751057.453544	241724300.260154	588227323.25	908562374.5625	185237679.625
High	D2H9M0	0.000	265.056	34	41	93	41	1503	172.4	6.65	226.62	0	380737196.75	316876638.479088	328040600.855677	380737196.75	304094924.25	251383413.5
High	G1MCP3	0.000	265.024	37	39	95	39	1178	133.3	5.59	237.81	0	267921806.0625	342184436.679659	261942736.675888	267921806.0625	328381892.875	200731431.15625
High	G1LVI9	0.000	264.945	44	21	123	21	534	59.8	4.46	368.13	0	4094739296.61328	3518529328.05213	1789509234.1742	4094739296.61328	3376603951.05469	1371333117.3125
High	D2I643	0.000	264.568	59	16	74	1	476	51.7	4.58	262.69	0
High	G1LZ43	0.000	264.568	39	33	124	32	1009	114.7	7.71	292.00	1	458058574.5	790189082.231103	600283735.207697	458058574.5	758315571.1875	460008224.6875
High	D2GU00	0.000	264.554	31	31	109	31	1354	150.1	6.11	268.83	0	678216205.96875	613662559.874433	544396439.113381	678216205.96875	588909521.875	417180784.34375
High	G1LYN3	0.000	264.422	38	33	75	33	1169	129.0	8.62	196.52	0	138443411.375	167659587.760553	733202270.884968	138443411.375	160896776.375	561866089.625
High	G1LS01	0.000	264.305	57	30	92	30	660	74.5	6.35	256.23	0	1274893891.25	1307650227.84043	237660926.053341	1274893891.25	1254904113.125	182123842.875
High	G1LK83	0.000	264.199	37	34	112	33	1233	138.4	7.23	281.57	0	712226293.59375	928115681.385671	549463238.520261	712226293.59375	890678685.5	421063563.875
High	D2HVN2	0.000	264.097	62	30	218	30	454	52.3	7.56	558.53	0	9474928030.9375	12162996253.3287	1436946705.05365	9474928030.9375	11672382798.75	1101158109.0625
High	G1LCE1	0.000	264.082	61	19	119	18	406	47.1	5.16	356.00	0	1626462433.5625	1662398666.93462	2062044180.64373	1626462433.5625	1595343219.75	1580181549.375
High	G1LPR6	0.000	264.021	53	24	75	23	593	68.0	7.20	223.86	1	359127361.78125	301833636.624517	592175255.07526	359127361.78125	289658705.375	453794550.5
High	G1M1L3	0.000	263.938	55	33	116	32	684	75.9	5.94	302.40	1	1422476120.75	731677275.409924	344919151.887889	1422476120.75	702163929.5	264317750.78125
High	G1LKE6	0.000	263.654	52	19	89	19	374	42.5	5.63	275.74	0	957258683.375	924863399.971713	1039074738.4588	957258683.375	887557589.9375	796261663.8125
High	G1M9X5	0.000	263.522	27	45	99	44	2183	242.8	6.28	223.53	1	259295055.75	299890508.647044	614689853.129392	259295055.75	287793956.5	471047892
High	G1LJG4	0.000	263.118	57	22	113	22	494	55.9	5.35	349.77	0	1579726347.75	1435820003.33326	1037121440.89261	1579726347.75	1377903960.5	794764816.75
High	G1M1B5	0.000	263.000	50	35	94	35	958	109.2	7.14	251.88	0	409058873.875	595249681.14686	475465712.914608	409058873.875	571239355.375	364357928.875
High	D2HIU4	0.000	262.887	70	20	94	1	451	51.0	5.80	333.04	0	1456837.375		3010641.84013692	1456837.375		2307109
High	G1MB04	0.000	262.731	33	34	80	1	1322	151.3	7.17	218.20	25	261698645.570313	311562921.139241	202126338.963293	261698645.570313	298995544	154893049.5625
High	G1LRB4	0.000	262.555	30	33	119	33	1225	139.9	4.96	301.19	0	960966667.125	900657491.137579	792403943.166187	960966667.125	864328064.25	607233396.0625
High	G1MHP1	0.000	262.395	59	20	270	18	384	42.7	8.66	614.61	0	9624116173.6875	8234007015.59467	10687653202.2933	9624116173.6875	7901875479.67969	8190140907.21875
High	D2GYL4	0.000	262.234	24	33	95	33	1868	207.0	4.81	254.09	0	438236681.25	625922368.273132	513499397.266409	438236681.25	600674811.75	393503825.375
High	G1M097	0.000	262.210	38	29	88	28	1040	117.7	5.83	269.71	0	387260853.78125	242096952.853079	301556601.496387	387260853.78125	232331594.0625	231088248.375
High	G1LNL2	0.000	262.201	42	13	497	13	424	46.2	6.29	1508.39	0	24486547562.9023	15999228839.0023	5893513949.08446	24486547562.9023	15353874950.2227	4516305756.5625
High	G1M062	0.000	262.173	36	41	87	41	1388	160.1	5.72	198.71	0	322364212.1875	403145314.023752	125861135.040224	322364212.1875	386883818	96449651.875
High	G1L9W3	0.000	261.669	38	32	122	31	1100	122.2	5.74	305.88	0	739459198.125	877159567.557147	790714859.676854	739459198.125	841777966.125	605939021
High	D2HND3	0.000	261.504	26	46	109	46	2264	250.2	7.40	236.90	0	227245412.8125	353648212.354918	495158912.043575	227245412.8125	339383259.25	379449181.625
High	G1LQX6	0.000	261.291	19	49	81	17	3069	350.7	5.81	170.24	0	121867721.625	50771307.1108667	12394248.1463713	121867721.625	48723367.125	9497935.3125
High	G1MDV3	0.000	261.174	59	34	123	24	719	81.4	7.15	287.04	9	983075654.125	1030891835.03471	940156347.391892	983075654.125	989309202.4375	720458721.3125
High	D2I0F5	0.000	260.366	35	34	79	2	1261	144.3	6.83	227.73	0	25594570	28653506.9651663		25594570	27497723
High	G1L4B1	0.000	260.216	30	44	99	44	1754	204.2	5.60	218.97	0	645874506.5	573132388.600992	620714910.149412	645874506.5	550014198.375	475665001.578125
High	D2GZR0	0.000	260.185	51	29	110	1	783	89.0	7.27	304.07	0	3968692.5	4206768.06145709		3968692.5	4037081.5
High	D2HI62	0.000	260.082	63	24	84	11	536	59.9	4.94	282.83	11	1068189883.625	1015288209.2246	453274382.425133	1068189883.625	974334973.25	347352313.125
High	D2I0P9	0.000	259.915	53	41	100	41	905	103.1	6.92	226.40	0	427904457.0625	356503429.889519	312277528.539505	427904457.0625	342123307.125	239303887.625
High	D2HC39	0.000	259.691	83	18	447	16	199	22.1	8.13	1274.97	2	18175834863.375	17398067271.9987	24153772517.209	18175834863.375	16696289049.7969	18509470377.875
High	G1LGA4	0.000	259.632	54	29	107	28	691	79.5	6.70	305.69	1	1005266719.1875	1251138703.40924	759762466.827598	1005266719.1875	1200672069.3125	582219645.5625
High	D2HCE1	0.000	259.386	43	43	89	42	1253	140.4	6.68	220.96	1	305091187.875	366769660.266916	249079733.547591	305091187.875	351975433.0625	190874280.46875
High	G1MIM1	0.000	259.211	62	19	150	19	351	39.5	6.54	453.44	0	3989628925.9375	3208223067.4751	1993162399.24567	3989628925.9375	3078814378.25	1527396201.1875
High	G1LBB5	0.000	258.933	56	25	151	25	606	67.7	7.33	465.34	0	1993917445.75	2271543547.66332	1478706405.20979	1993917445.75	2179917290.125	1133159318.5
High	G1M543	0.000	258.863	43	35	89	35	944	102.8	6.62	229.17	0	334074337.125	378638701.915818	317466141.811663	334074337.125	363365718.375	243280015.3125
High	D2GY35	0.000	258.781	43	34	74	34	911	103.2	7.09	195.28	0	799648269.625	1114803443.66576	179872968.301601	799648269.625	1069836105.25	137839891.3125
High	D2HA21	0.000	258.662	89	17	223	17	189	20.0	6.79	634.66	0	12661384990.5391	12515645569.1307	6413914913.66971	12661384990.5391	12010807453.5	4915098377.125
High	D2I381	0.000	258.400	44	26	105	24	706	80.6	7.28	288.53	3	1249945217.625	1204519690.28153	907144966.598971	1249945217.625	1155933506.90625	695161506.375
High	G1LGL9	0.000	258.249	53	30	93	27	874	97.7	5.86	238.93	1	612852219.9375	693136765.257232	575392969.196452	612852219.9375	665178011.03125	440933982.9375
High	G1KZF6	0.000	257.787	82	21	337	21	317	35.1	7.69	890.94	0	6581995833.53125	7328190154.36881	12299381900.6747	6581995833.53125	7032596156.59375	9425237601.89063
High	G1MCK8	0.000	257.354	69	24	164	24	412	46.6	8.02	403.89	0	4030837501.78125	3360781170.39406	3226732981.28558	4030837501.78125	3225218811.76563	2472703528.6875
High	D2GUB5	0.000	257.339	45	32	107	32	934	104.7	5.59	270.15	0	787526715.65625	1149056966.78052	1198667617.37301	787526715.65625	1102707959	918560557.8125
High	G1L8L1	0.000	257.273	46	32	177	31	918	102.1	5.22	480.85	1	3170586145.875	2746841075.54083	3423085571.78279	3170586145.875	2636042949.71875	2623172050.9375
High	G1LQ78	0.000	257.200	29	31	88	31	1593	175.5	5.06	227.28	0	260167048.453125	397560608.58042	310407646.247298	260167048.453125	381524380.375	237870963.1875
High	G1LZD4	0.000	257.133	46	25	77	24	796	86.6	5.69	227.56	1	360766104.875	400303022.374947	385082904.295716	360766104.875	384156174.625	295095956.75
High	G1LYB8	0.000	256.670	50	32	109	32	910	100.1	7.90	294.90	0	571575285.125	907135670.366825	886592227.423174	571575285.125	870544936	679411572.625
High	G1L7A5	0.000	256.644	35	28	69	28	975	109.9	5.27	202.50	0	80183823.375	38664512.1872168	1253925628.64264	80183823.375	37104918.6875	960905765.875
High	G1MEG0	0.000	256.492	58	16	182	16	447	49.3	6.95	506.14	0	6479435589.89063	7310178752.11902	1406913097.72851	6479435589.89063	7015311272.39063	1078142815.5
High	D2HYG7	0.000	256.427	62	32	215	32	511	57.2	6.21	495.10	0	3921854201.75	3595306927.27705	2898646680.89589	3921854201.75	3450284605.875	2221285094.8125
High	G1LX74	0.000	256.371	57	22	127	22	490	55.7	6.93	409.54	0	1760486327.25	1635592742.08013	1343550519.60075	1760486327.25	1569618553.75	1029586932.0625
High	G1MA03	0.000	256.349	30	40	88	40	1587	180.5	6.19	198.20	0	737418613.5	342284933.761447	447578483.250557	737418613.5	328478336.25	342987443.125
High	G1MHF9	0.000	256.344	39	29	81	29	966	111.5	6.14	227.80	0	270047797.25	283149329.665199	176034505.704608	270047797.25	271728059.125	134898408.375
High	D2H441	0.000	256.296	45	26	159	26	723	81.4	6.46	497.70	0	1638985078.5	1795092010.48671	1374302071.21668	1638985078.5	1722684170	1053152399.25
High	D2HG70	0.000	256.268	14	21	45	4	1913	218.4	6.67	147.38	1	67499084.5	4687367.93305812	48245406.8209811	67499084.5	4498295.625	36971323.125
High	D2HYA4	0.000	255.821	44	27	151	27	669	69.5	9.67	415.68	0	4386649581.375	3915869359.76534	2313951754.34757	4386649581.375	3757916651.875	1773222854.625
High	G1LN56	0.000	255.720	47	21	169	2	528	60.0	7.65	444.34	19	4438839287	2160696553.23073	5695916963.04727	4438839287	2073541482.375	4364883631.625
High	G1LZR6	0.000	255.632	33	46	115	46	1614	182.8	7.17	271.50	0	730988631.625	932980997.251586	914218639.120121	730988631.625	895347751.25	700582188.875
High	D2HDF8	0.000	255.482	34	35	101	35	1069	121.5	5.21	192.34	0	620491686.875	683305906.688097	513212432.761194	620491686.875	655743695.5	393283919.3125
High	D2H7R7	0.000	255.219	31	35	104	1	1422	163.6	6.10	251.75	0	13451163.25	37499064.3401756	16712605.1936629	13451163.25	35986481	12807170
High	D2GXN1	0.000	254.867	68	26	93	26	561	61.1	7.31	243.04	0	1007950099.875	713225149.19879	213762968.280448	1007950099.875	684456098.625	163810407.9375
High	G1M7L6	0.000	254.735	40	38	134	37	1014	113.1	9.11	300.76	0	982594773.15625	1031755798.60497	850608435.818785	982594773.15625	990138316.6875	651836545.8125
High	D2GZN1	0.000	254.703	42	31	113	31	1049	116.9	4.84	289.59	0	533699146.5	656929725.464284	923723891.973689	533699146.5	630431438.75	707866235.125
High	D2HTF2	0.000	254.298	72	33	130	33	603	68.1	6.64	347.65	0	2055922921.9375	1938883272.90176	798628066.352732	2055922921.9375	1860675387.21875	612003053.625
High	G1M959	0.000	254.248	23	48	89	47	2446	277.8	5.77	191.28	1	399870776.75	334794325.109861	172545505.003859	399870776.75	321289873	132224724.375
High	G1LIU3	0.000	254.081	45	14	107	14	390	45.1	4.50	374.72	0	1305092706.5	1375737849.09589	2211711765.834	1305092706.5	1320245313.8125	1694874512.25
High	G1KZY6	0.000	254.066	67	17	140	17	230	26.4	8.72	430.69	0	2849958794.625	3704470643.81623	1544326312.98102	2849958794.625	3555045033.375	1183445034.25
High	G1KZJ3	0.000	253.908	46	37	107	37	944	107.9	6.90	247.93	0	758295619.6875	606436802.018429	416836781.98411	758295619.6875	581975226.25	319429524.4375
High	D2HND4	0.000	253.897	61	17	213	17	429	47.3	9.03	551.64	0	9168417703.04688	7448812663.90378	1408337920.89712	9168417703.04688	7148353168.77344	1079234683.125
High	G1LFY5	0.000	253.864	63	27	156	18	399	44.1	5.16	423.87	10	636425888.9375	318964298.407899	13998686745.5336	636425888.9375	306098375.154297	10727445473
High	G1LAX6	0.000	253.668	30	31	163	31	1310	150.6	6.81	379.73	0	3846594873.875	3081445015.61016	432576424.242183	3846594873.875	2957150117.15625	331491095.4375
High	G1L6V5	0.000	253.594	43	27	125	25	844	94.2	7.20	332.58	2	1728788136.4375	1548256127.48298	1099791472.88385	1728788136.4375	1485804797.9375	842789989.625
High	G1LWC8	0.000	253.574	54	29	142	25	650	71.5	8.65	388.75	4	1644913285.8125	1687286154.95498	1744619567.44742	1644913285.8125	1619226832.0625	1336933358.1875
High	D2H3W4	0.000	253.319	42	28	74	28	766	87.6	5.35	237.94	0	446746269.625	456460234.829047	135869410.797628	446746269.625	438048198.1875	104119173.625
High	G1M390	0.000	253.048	37	31	118	23	1041	116.3	5.54	321.99	9	665126005.375	943454572.261129	1231807954.58669	665126005.375	905398858.25	943956594.375
High	G1LRB0	0.000	252.341	54	27	354	1	432	47.7	6.34	762.92	28	21700875226.3438	16369770390.0928	21242560263.7271	21700875226.3438	15709470129	16278556058.75
High	G1MIJ3	0.000	252.294	63	22	82	2	540	60.1	5.85	264.21	15	1043499127.8125	1296001987.62477	732221979.562101	1043499127.8125	1243725722.875	561114874.75
High	D2HVC9	0.000	252.138	26	45	68	45	2138	241.2	7.72	169.54	0	154929043.25	205407488.427702	327434916.098475	154929043.25	197122056.5	250919266.375
High	D2HAT3	0.000	252.076	21	38	77	38	2569	274.3	6.47	205.10	0	127693229.625	139753219.033375	432647256.538034	127693229.625	134116054.625	331545375.5
High	G1M8K4	0.000	252.010	28	36	118	36	1595	182.8	8.47	259.23	0	288923004.0625	370500321.242816	575654866.839373	288923004.0625	355555612	441134679.8125
High	G1LNS1	0.000	251.996	29	40	96	40	1780	201.6	6.09	208.95	0	409022362.25	430807299.612784	284638255.341009	409022362.25	413430014.1875	218123415.375
High	G1M2M5	0.000	251.833	63	18	82	18	393	43.5	7.39	289.54	0	1174361429.5	1118318528.86859	851256110.40654	1174361429.5	1073209404	652332870.5
High	G1M9I4	0.000	251.761	41	28	127	28	952	106.3	6.51	399.98	0	1000428614.625	1013092299.9173	479130560.492196	1000428614.625	972227639.375	367166367.5
High	G1LM51	0.000	251.759	63	18	103	18	332	37.4	7.59	342.88	0	1640421603.375	1622555601.83391	519503969.542036	1640421603.375	1557107286.92188	398105237.125
High	G1LWQ1	0.000	251.392	42	34	73	33	1010	113.7	8.76	180.29	0	269377982.625	340511236.017107	46532897.269932	269377982.625	326776183.375	35658996.25
High	D2HZX8	0.000	251.188	52	31	84	31	779	88.7	6.09	224.54	0	516210084.75	589056441.657132	364061046.385603	516210084.75	565295929.875	278986528.875
High	G1L5A3	0.000	250.933	36	29	110	29	950	107.7	8.06	284.24	0	751697309.6875	979238707.051392	790875314.118474	751697309.6875	939739584.0625	606061980.125
High	G1M9J0	0.000	250.444	67	26	153	23	405	46.2	6.73	419.10	0	2366471923.875	2990359363.64019	3124286121.40744	2366471923.875	2869738547.25	2394196657.06445
High	D2HKC8	0.000	250.307	17	52	93	51	3878	434.7	6.43	211.11	1	366391734	207371585.345125	55564491.5799266	366391734	199006928.5	42580069.4375
High	D2HRK9	0.000	250.235	32	44	101	44	1688	190.7	7.90	214.98	0	225410967.3125	397008307.660006	183592640.337655	225410967.3125	380994357.375	140690342.90625
High	G1L9M3	0.000	250.186	60	21	281	21	402	44.7	8.81	796.75	0	4502579389.69531	4769659282.41426	4687611179.52358	4502579389.69531	4577267624.22656	3592200771.47656
High	G1L920	0.000	250.145	68	21	111	21	547	60.4	6.52	316.41	0	1549694050.34375	1133062312.24725	739927014.170605	1549694050.34375	1087358473.84375	567019381.375
High	D2H433	0.000	250.126	55	27	322	1	423	46.6	6.21	671.73	0	158062560		23190949.7874329	158062560		17771642
High	G1LAW7	0.000	250.089	46	34	98	34	784	85.8	7.75	242.17	0	520177679.375	609041342.346296	397126616.25291	520177679.375	584474708.375	304325269.875
High	D2GU34	0.000	250.023	59	23	89	23	555	61.7	6.62	268.90	0	388884341.75	857714276.229545	437665101.683371	388884341.75	823117031	335390640.5
High	G1LTY2	0.000	249.984	33	22	128	22	950	106.8	7.40	341.56	0	748076544.3125	686514683.136298	1320895911.70206	748076544.3125	658823040.9375	1012226298.5
High	D2HDF9	0.000	249.917	50	35	179	28	672	73.5	8.72	390.77	0	914898051.5	973006071.914181	412283294.086926	914898051.5	933758352	315940104.75
High	G1L2I2	0.000	249.606	42	34	90	34	907	103.6	7.96	227.88	0	379969024.75	415105431.026839	453017308.171529	379969024.75	398361505	347155312.5
High	D2I3E4	0.000	249.604	21	36	77	36	2221	254.8	8.60	156.12	0	420579842.875	247895340.567108	99619240.3003031	420579842.875	237896094.75	76340015.875
High	D2HMP6	0.000	249.599	71	13	497	1	242	25.9	7.83	1311.79	0			21640019.2111777			16583136
High	G1LHC9	0.000	249.514	32	39	108	38	1232	139.7	8.56	252.89	0	594323175.25	645327328.599287	586968261.786314	594323175.25	619297042.6875	449804337.875
High	D2HET1	0.000	249.464	60	19	183	12	355	40.4	5.54	508.51	6	1715170730.88281	1741139503.83204	3563483217.55922	1715170730.88281	1670907921.98438	2730761292.48438
High	G1M0N1	0.000	248.788	48	26	131	24	663	74.7	6.83	316.53	2	2675759951.4375	2394710679.48199	1152347453.91904	2675759951.4375	2298116283.27344	883064583.3125
High	G1L7Z7	0.000	248.624	62	24	157	24	570	62.7	7.61	433.59	0	4377559161	4702532798.20912	1147649676.05135	4377559161	4512848791.625	879464591.625
High	G1LGA1	0.000	248.496	32	39	117	38	1381	153.7	6.27	287.12	1	577270546.375	722973054.173871	532604314.498598	577270546.375	693810806.625	408144267.125
High	G1L5X1	0.000	248.310	53	39	88	39	964	108.3	6.49	220.71	0	527210103.1875	522130223.927184	508955217.902992	527210103.1875	501069285.6875	390021538.984375
High	G1LUM3	0.000	248.173	24	35	66	35	2171	240.5	6.39	159.26	0	134584106.6875	200321909.012434	167405590.265527	134584106.6875	192241611.875	128285915.25
High	G1L343	0.000	248.125	36	38	76	32	1553	168.1	8.25	188.90	3	187469416.375	141746094.65999	294129798.31806	187469416.375	136028544.5	225396955.5
High	G1L5U1	0.000	248.057	45	38	89	38	1245	137.9	6.32	230.76	0	449958146.75	272522247.257444	506234331.817142	449958146.75	261529636.6875	387936475.03125
High	G1M8Z2	0.000	248.037	71	21	166	18	418	47.3	5.88	495.03	3	2330971815.1875	2426723344.95471	3661519520.43725	2330971815.1875	2328837667.875	2805888274.9375
High	G1M1M5	0.000	247.991	40	30	88	30	1174	128.2	5.90	264.42	0	535861771.25	523745187.310607	588273977.089352	535861771.25	502619107	450804931
High	G1LXE4	0.000	247.982	50	30	93	30	839	94.7	7.11	284.76	0	521270426.125	520919894.231933	413928024.741671	521270426.125	499907776.53125	317200491.4375
High	G1M0G8	0.000	247.931	44	26	118	21	882	99.7	4.91	306.67	0	320533519.1875	321511448.01197	394104990.477093	320533519.1875	308542781.5	302009743.6875
High	G1MHH5	0.000	247.795	66	19	135	10	376	42.6	6.64	381.20	7	3211873273.35547	2414996160.00487	1078313269.00496	3211873273.35547	2317583517.25	826330855.625
High	G1LNW1	0.000	247.733	32	33	77	33	1359	153.3	7.21	209.30	0	365757270.5	488772695.990124	147245813.775445	365757270.5	469057285.75	112837115.875
High	D2H478	0.000	247.682	61	17	76	17	417	45.5	5.49	243.87	0	2889438088	2178323036.2072	46877537.3264778	2889438088	2090456973.625	35923100.125
High	G1MAN8	0.000	247.635	74	20	263	20	227	25.1	6.01	564.08	0	12191930975.8418	11086771851.6512	8151736885.20104	12191930975.8418	10639569589.5625	6246822615.28125
High	G1L538	0.000	247.615	62	25	165	23	440	49.2	6.21	466.90	0	2970966051.4375	2701876996.84107	1514220342.50075	2970966051.4375	2592892567.375	1160374287.5
High	G1M5X7	0.000	247.562	65	23	88	23	579	62.8	7.65	312.13	0	528485855.25	588925136.639109	218590144.862432	528485855.25	565169921.25	167509560.1875
High	D2GZK3	0.000	247.359	42	21	85	1	700	78.5	6.42	256.06	0	8113347	5845718.17459357		8113347	5609922
High	G1LKZ9	0.000	247.335	45	28	112	28	720	83.4	8.34	272.52	0	871742510.0625	1239363529.82538	736371906.774282	871742510.0625	1189371865.75	564295038.625
High	G1LQU1	0.000	247.175	48	31	162	31	582	67.2	5.85	423.18	0	3180850684.89063	2803007712.50671	285172234.388831	3180850684.89063	2689944017.64063	218532613.125
High	D2GU97	0.000	246.967	47	24	81	24	727	83.8	6.51	218.06	0	501252559.25	471843565.503208	199783475.840626	501252559.25	452811018.1875	153097671.40625
High	G1L1P7	0.000	246.915	72	22	167	9	330	37.5	6.33	457.11	12	3319637245	3263825743.45941	3001421818.82651	3319637245	3132174233.4375	2300043531.8125
High	D2HPV1	0.000	246.510	68	14	195	6	161	17.6	5.41	635.26	11	3789324091.55469	4231046155.11153	3804587633.85306	3789324091.55469	4060380298.82031	2915523943.875
High	G1L9R1	0.000	246.434	71	16	122	16	330	35.4	8.46	384.10	0	2026993583.125	2596349343.2042	748124759.628922	2026993583.125	2491621536.5	573301461.1875
High	G1LEZ3	0.000	246.432	37	35	95	35	1366	153.5	5.59	239.87	0	526886869.25	801168957.59382	1088460058.16548	526886869.25	768852556.125	834106522.6875
High	D2HU89	0.000	246.164	75	27	201	25	332	36.2	7.74	492.28	1	13385571718	9943441493.41603	5147810507.12036	13385571718	9542357247.40625	3944859794.6582
High	D2HZ39	0.000	246.136	40	30	95	30	929	105.6	9.28	253.69	0	347629206.75	591147377.37835	583293450.655591	347629206.75	567302524.4375	446988264
High	D2H9E2	0.000	246.018	41	30	71	30	925	104.9	6.35	185.17	0	497288612.3125	490507432.882968	71803244.3646728	497288612.3125	470722049.320313	55024117.8125
High	G1LU05	0.000	245.895	52	23	68	23	566	61.2	4.72	216.92	0	230709639.222656	170120100.641346	1631747320.20597	230709639.222656	163258040.625	1250437324.6875
High	G1LA44	0.000	245.426	25	33	50	33	1863	202.4	9.39	125.38	0	43986546.875	80428812.3117258	470814747.77744	43986546.875	77184590.5234375	360793810.625
High	G1M7E5	0.000	245.092	19	41	74	41	2948	327.9	6.06	175.83	0	272221887.875	287247796.476547	108717442.892688	272221887.875	275661207.875	83312132.1875
High	G1MCN4	0.000	245.067	45	30	78	27	970	104.7	6.64	203.16	2	160288537	158260704.431288	372714612.736937	160288537	151877011.6875	285617912.4375
High	D2HA37	0.000	245.016	38	31	85	1	1308	146.6	6.81	220.76	0	3835620.5	5524881.21460989		3835620.5	5302026.5
High	G1MI45	0.000	245.015	37	35	101	35	1203	135.7	6.02	242.57	0	527770751.3125	478384680.639651	920818163.867045	527770751.3125	459088287.226563	705639523.40625
High	G1LR70	0.000	244.926	33	27	101	27	709	79.3	6.06	282.92	0	884069679.25	780707799.83162	1644560628.64086	884069679.25	749216731.125	1260256393.4375
High	G1LDQ8	0.000	244.848	67	25	97	25	504	55.8	8.02	262.14	0	1021203019	1235558593.78627	1237292479.95921	1021203019	1185720407.75	948159484.828125
High	G1MFI1	0.000	244.747	52	25	83	25	694	76.4	6.79	220.32	0	680768129.125	592204704.93065	165768523.286417	680768129.125	568317203.03125	127031401.375
High	G1M6K8	0.000	244.497	48	27	87	27	740	83.5	6.24	256.41	0	664606540.8125	515199533.254465	368839600.935947	664606540.8125	494418155.25	282648421.1875
High	G1LJM2	0.000	244.450	70	27	374	27	445	51.2	6.74	868.10	0	15634218661.0781	13626356532.7845	8567672170.54299	15634218661.0781	13076716155.3125	6565561306.625
High	D2HXR7	0.000	244.314	54	26	77	2	685	76.9	6.51	231.34	0	35957141.5	31577134.5510543	11865789.2449666	35957141.5	30303421.5	9092967.75
High	G1M430	0.000	244.249	65	25	112	25	494	56.2	6.96	309.98	0	1113479812.25	1029744616.1045	1045004304.09445	1113479812.25	988208258.375	800805596.625
High	G1LLI6	0.000	243.993	43	28	94	28	752	84.8	5.11	239.05	0	520704632.25	748695418.483578	232463430.290365	520704632.25	718495619.1875	178140908.375
High	G1M048	0.000	243.791	28	36	67	36	2231	245.2	6.71	175.85	0	204737219.375	242856348.904105	96030909.0982344	204737219.375	233060358.6875	73590213.125
High	D2I5Z9	0.000	243.693	50	28	128	27	740	84.6	6.25	287.85	1	272119022.3125	295738079.167161	1335754679.75407	272119022.3125	283809021.75	1023612839.75
High	G1KZH0	0.000	243.570	63	23	92	23	437	49.4	8.38	238.45	0	1694674886.5	1583377591.34359	180753871.542613	1694674886.5	1519509582.6875	138514943.3125
High	G1MJH6	0.000	243.300	66	24	96	24	522	57.9	9.17	271.62	0	576777008.625	613059985.078722	878863730.785509	576777008.625	588331252.875	673489086.625
High	G1L9A4	0.000	243.055	36	40	95	40	1342	151.4	6.52	197.41	0	260459020.875	564139363.640554	229254600.325696	260459020.875	541383921.125	175681924.25
High	G1MC98	0.000	242.669	23	23	96	22	1267	139.6	6.98	267.23	1	711386560.15625	801310967.211076	393537859.803092	711386560.15625	768988837.5625	301575141.25
High	G1MC95	0.000	242.666	84	20	153	17	276	31.1	7.09	438.55	3	1547895502.5	1635244527.68347	1469396350.53397	1547895502.5	1569284385.125	1126024856.125
High	D2HL44	0.000	242.595	68	19	164	19	346	38.2	5.36	429.18	0	2820087085.0625	2465840990.53196	1563561403.89953	2820087085.0625	2366377442.10938	1198185230.4375
High	G1LEX2	0.000	242.442	39	31	89	30	981	109.1	6.37	199.51	1	202017373.203125	270066151.224613	998207836.491513	202017373.203125	259172611.125	764944621.6875
High	G1M2R1	0.000	242.286	29	37	64	34	1783	202.3	9.00	158.59	3	232601143.8125	154126503.151845	323731239.01351	232601143.8125	147909569.875	248081072
High	G1LQI7	0.000	241.895	21	33	57	33	1908	210.7	5.53	144.03	0	232025538.75	302317294.534368	103061892.258731	232025538.75	290122854.1875	78978182
High	G1M1Y1	0.000	241.746	60	18	152	18	345	36.3	10.11	460.38	0	1836984504.75	1844047180.09247	3145405639.08365	1836984504.75	1769664656.36328	2410380923.375
High	G1LHG8	0.000	241.728	63	33	155	33	589	66.2	7.08	401.13	0	2895167572.5625	2556021052.08204	1438203669.70677	2895167572.5625	2452919950	1102121343.6875
High	G1MEM8	0.000	241.462	54	30	123	30	701	77.3	9.11	316.66	0	1685733156.25	1842078263.2683	129231214.645123	1685733156.25	1767775158.875	99032204.5
High	G1MDP5	0.000	241.084	22	39	68	27	2450	275.3	6.49	175.05	1	77067406.875	55933739.5113512	12733490.8025424	77067406.875	53677564.75	9757903.0625
High	G1LNL1	0.000	240.983	55	20	518	19	255	29.1	4.74	1402.38	1	22877743255.6523	22389241140.3674	20905841683.8004	22877743255.6523	21486136123.1094	16020522553.7813
High	G1LVC6	0.000	240.883	46	24	80	2	805	89.9	7.46	232.08	16	580388179.125	460066653.028469	128994315.35508	580388179.125	441509145.875	98850664.3125
High	D2H454	0.000	240.772	59	22	123	20	535	58.7	5.72	365.82	0	917371730.875	1224834662.77636	2279674667.34437	917371730.875	1175429043.25	1746955706.25
High	G1LLK2	0.000	240.626	46	25	165	21	667	70.0	7.36	413.57	3	2335995995.25	2401832242.90691	4278299628.14876	2335995995.25	2304950587.3125	3278537966.625
High	G1MIM3	0.000	240.186	44	28	85	7	855	94.0	7.42	240.54	17	421474260.125	526025332.13925	344440065.481717	421474260.125	504807278.625	263950618.25
High	G1MCL7	0.000	239.700	55	37	86	37	887	101.8	6.93	215.92	0	341731379.8125	316209215.427679	172815299.09132	341731379.8125	303454422.75	132431472.4375
High	G1MFS3	0.000	239.513	32	28	138	1	897	100.4	5.72	335.08	0	62398602.5	114842595.493185	23547759.8897509	62398602.5	110210240	18045072
High	D2HUM0	0.000	239.319	75	24	128	17	320	37.3	7.15	318.01	8	2890053275.3125	2823579602.30286	2069322918.81946	2890053275.3125	2709686108.125	1585759377.375
High	G1LGX3	0.000	239.256	36	43	77	43	1716	193.7	7.50	175.97	0	101360304.1875	198882440.553442	270018736.53367	101360304.1875	190860206.625	206920215.125
High	D2H8I4	0.000	239.245	58	27	111	27	517	57.2	7.08	283.79	0	1176406493.875	1455261262.64834	739759075.727456	1176406493.875	1396561026.25	566890687.125
High	G1L2L0	0.000	239.201	73	26	190	26	465	50.9	8.21	527.32	0	2955686579.95703	2472715055.24485	1370348164.6419	2955686579.95703	2372974230.68359	1050122449.51563
High	G1LC99	0.000	239.161	36	31	85	1	1362	152.4	5.95	215.90	24	285236569	240729936.226948	291562568.928702	285236569	231019718.1875	223429641.4375
High	G1LCS2	0.000	239.076	52	39	85	37	875	97.5	6.55	210.84	2	271317572	251048584.460457	385498709.775162	271317572	240922147.625	295414595.96875
High	G1LKB0	0.000	239.013	58	25	145	25	546	60.3	5.90	421.85	0	2222901023.3125	1852312131.3885	1050222252.20257	2222901023.3125	1777596227.9375	804804204.125
High	G1MIJ8	0.000	239.004	36	27	108	16	732	83.8	7.36	311.36	3	635935209.625	520690037.540716	670567647.986812	635935209.625	499687191.46875	513868051.375
High	G1MD79	0.000	238.820	67	26	234	26	465	52.0	7.06	520.01	0	7019036202.5	5368282204.46344	2881177908.94645	7019036202.5	5151744155.5625	2207898460.625
High	G1LE42	0.000	238.716	45	27	134	27	599	68.5	5.49	314.88	0	2528987954.875	2863462302.24624	1323004190.70446	2528987954.875	2747960077.0625	1013841910.625
High	G1M366	0.000	238.531	55	22	77	22	534	59.8	7.56	221.40	0	441786070.625	536664555.847841	890684854.98868	441786070.625	515017352.625	682547826.75
High	D2HY85	0.000	238.407	26	38	71	33	1856	214.3	7.46	186.63	0	241590984.875	243033141.809631	57332678.2054699	241590984.875	233230020.375	43935062.65625
High	G1LB93	0.000	238.378	64	23	86	23	455	52.4	6.37	275.57	0	568312313.25	571691921.745101	1008508372.85844	568312313.25	548631835	772838108
High	G1M6P2	0.000	238.302	41	30	81	29	955	109.1	8.19	209.77	1	582765893.71875	670928622.598904	111195648.492646	582765893.71875	643865668.5	85211225.71875
High	D2H4M9	0.000	238.216	32	28	141	1	895	100.2	5.67	340.37	24	1984132319.8125	1425395322.76032	2485975856.87937	1984132319.8125	1367899775.70313	1905048018.90625
High	D2H0K1	0.000	238.206	67	30	199	30	450	51.9	7.27	425.67	0	9276324898.96875	5454079113.11603	142608190.276669	9276324898.96875	5234080311.875	109283221.5625
High	G1LE20	0.000	238.164	57	20	143	17	453	48.7	7.69	487.92	0	2734676376.375	1170226642.86091	1549885414.68913	2734676376.375	1123023723.125	1187705073.89063
High	G1M4G0	0.000	237.668	60	25	284	23	421	47.4	7.85	643.42	0	6685718488.3125	6157255455.10296	7083939610.32161	6685718488.3125	5908892937.625	5428550355.125
High	G1M447	0.000	237.445	54	22	218	9	435	49.8	5.68	510.12	0	1434393521.32813	1337202194.38894	425549488.846512	1434393521.32813	1283264054.9375	326106228.4375
High	D2HNC4	0.000	237.426	49	16	138	16	605	67.2	5.03	367.73	0	1031923757.1875	1131444173.27135	802946879.558571	1031923757.1875	1085805605.03125	615312637.875
High	D2H346	0.000	237.306	29	25	100	17	1155	126.5	5.66	271.97	0	136871545.625	217586773.674269	440883864.045702	136871545.625	208810071.25	337857236
High	G1M077	0.000	237.234	10	14	137	11	1693	161.9	8.16	386.59	2	9191055773.01563	12413145870.5409	2441595328.6231	9191055773.01563	11912442240.375	1871038421.75
High	G1M4S9	0.000	237.047	28	40	76	40	1919	220.1	7.49	163.78	0	1104351607.375	180758463.761768	336440924.342651	1104351607.375	173467288.75	257820732.5
High	G1M2Z5	0.000	236.912	41	38	118	38	1109	124.1	6.37	258.93	0	319949143.125	450638695.899578	992849491.786847	319949143.125	432461480.125	760838425.75
High	G1LRF4	0.000	236.549	50	24	78	24	682	77.0	7.61	217.52	0	302143800.5625	399412458.788993	624843875.334915	302143800.5625	383301533.3125	478829101.875
High	G1LH55	0.000	236.544	43	31	104	31	920	102.4	6.77	267.62	0	933760216	1121827631.76577	832487917.375353	933760216	1076576961.75	637950466.5625
High	G1LGZ1	0.000	236.515	46	16	107	16	386	44.0	4.67	358.80	0	1834352732.125	2133859280.66743	1448371035.99745	1834352732.125	2047786733.125	1109912779.375
High	G1MBU4	0.000	236.378	48	29	75	29	854	94.1	6.23	217.71	0	218074309.125	304187799.460099	310817036.757603	218074309.125	291917909.375	238184686.5
High	G1L393	0.000	236.376	52	20	113	20	501	58.9	5.38	328.37	0	1017851886.6875	991262978.219183	1271213588.86213	1017851886.6875	951278837.46875	974153840.78125
High	D2H3G4	0.000	236.366	48	36	123	1	848	99.1	7.20	241.79	29	1024775843.125	1266433840.33842	873079986.876786	1024775843.125	1215350253	669056899.625
High	G1MCX6	0.000	236.151	24	24	96	24	843	100.1	6.32	266.30	0	683532267.125	904386557.869663	1030358681.56738	683532267.125	867906713.25	789582392.625
High	D2HQA5	0.000	236.035	64	24	159	23	529	57.9	5.27	455.87	0	1656283682.875	2619438821.87261	501852908.628307	1656283682.875	2513779664.97656	384578911.625
High	G1LPZ1	0.000	236.025	42	26	113	1	774	88.2	8.50	265.57	23	615929596.6875	740330022.675465	791951493.670603	615929596.6875	710467654.6875	606886675.875
High	G1LKJ5	0.000	236.000	38	30	112	29	877	100.8	5.21	286.39	1	691986847.625	956315430.311471	550730634.384858	691986847.625	917740953.5	422034792.125
High	D2H4X6	0.000	235.896	57	23	133	16	524	57.9	5.77	380.53	7	1068399364.875	842981780.760082	1305918474.89723	1068399364.875	808978793.75	1000748819.25
High	G1L421	0.000	235.891	55	21	96	21	524	57.3	9.00	289.82	0	559153627.0625	525977814.438562	396041234.417783	559153627.0625	504761677.625	303493522.25
High	G1M6I9	0.000	235.727	46	30	105	26	741	82.7	7.74	257.09	4	623916072.4375	653485617.228294	556146187.308748	623916072.4375	627126254	426184827.75
High	G1MFW2	0.000	235.628	45	27	84	27	696	78.7	5.08	256.87	0	363672024.75	493679545.167019	509569094.612773	363672024.75	473766209.5	390491963.75
High	G1LSF7	0.000	235.614	63	24	222	11	429	49.1	5.67	488.62	14	6842325767.3125	7312019299.65084	6439936618.72994	6842325767.3125	7017077578.5625	4935039277.8125
High	G1M7I9	0.000	235.614	37	31	158	31	893	102.1	5.96	388.30	0	1703146952.64063	2072908972.36073	2441335176.17606	1703146952.64063	1989294950.71875	1870839062.25
High	D2GX26	0.000	235.606	53	28	87	28	726	79.2	5.48	239.93	0	711868330.75	612557359.907243	596322815.287022	711868330.75	587848901.875	456972900.5
High	D2GVP7	0.000	235.554	51	29	104	1	580	63.5	9.50	246.94	0	16821735.5	110305500.686429	116178893.486171	16821735.5	105856156	89029976
High	D2HU08	0.000	235.476	37	41	104	1	1355	151.9	7.77	232.62	0		16813078.7982605	24506040.9306644		16134897	18779420
High	D2I296	0.000	235.322	43	26	117	1	747	85.1	8.27	256.90	0	239518275	271127201.729262	280593530.539807	239518275	260190862.5	215023870
High	D2H7U7	0.000	235.118	54	28	96	28	586	63.3	6.76	264.00	0	2529250565.75	1782545722.35547	169504488.126414	2529250565.75	1710643956	129894338.4375
High	D2HKW5	0.000	235.023	53	24	98	24	637	72.8	5.83	266.12	0	445800202.3125	483668696.575402	337065982.747891	445800202.3125	464159164.125	258299726
High	G1L3P9	0.000	234.909	50	27	87	27	723	81.3	6.23	231.90	0	207681005.875	198260888.075784	826437167.875629	207681005.875	190263725.4375	633313668.375
High	G1MGM4	0.000	234.904	70	18	197	13	254	28.8	8.91	487.33	0	3224126337.96094	1292529424.14911	325149711.032769	3224126337.96094	1240393230.67188	249168072.625
High	G1LW62	0.000	234.520	20	30	79	27	1905	206.2	6.77	204.76	3	293708821.625	212968986.645691	542310529.047893	293708821.625	204378549.875	415582313.9375
High	D2H7Y0	0.000	234.365	59	20	133	20	335	36.6	7.68	307.73	0	3160787249.14063	3116071161.38579	250822371.950614	3160787249.14063	2990379563.25	192209695.625
High	D2GWR9	0.000	234.253	55	17	106	4	315	37.1	4.60	358.90	0	93329884.375	143654673.676136	449480900.91041	93329884.375	137860138	344445300
High	G1M0V1	0.000	234.221	84	14	391	13	199	22.0	5.44	1523.02	0	8788850439.05664	7395228205.47911	11555187257.9696	8788850439.05664	7096930123.1875	8854947860
High	G1L5H8	0.000	234.174	48	15	319	15	385	41.1	7.64	869.21	0	17910041100.9063	8709654984.66677	2790217526.37137	17910041100.9063	8358337444.875	2138193883.1875
High	D2HUG1	0.000	234.169	81	18	99	7	146	17.0	5.90	247.02	11	4843323378.53125	6344245826.92411	322405504.116486	4843323378.53125	6088340760.6875	247065137.5
High	G1MEG9	0.000	234.146	14	22	50	5	1893	217.1	6.55	141.58	12	734133471.25	128053415.297577	84865101.7900404	734133471.25	122888180.75	65033654.125
High	D2HXQ5	0.000	234.065	15	51	84	47	4075	467.4	5.80	155.76	0	324749987.375	157951629.211989	85325781.2242296	324749987.375	151580403.5	65386681.0625
High	D2HE54	0.000	234.030	35	38	120	38	1091	120.9	6.04	262.61	0	789603585.9375	965071372.41449	1256374177.82016	789603585.9375	926143711	962782133.15625
High	G1MAG9	0.000	233.801	31	29	154	29	913	105.5	5.72	365.20	0	3543145242.5	3188332393.76587	2549731310.39431	3543145242.5	3059726025.9375	1953904969.82031
High	G1M9F8	0.000	233.705	41	27	76	27	921	101.7	6.79	225.67	0	186093342.164063	242074304.4832	273208267.762089	186093342.164063	232309859.25	209364410.28125
High	G1LP98	0.000	233.305	46	32	93	32	752	86.4	6.16	237.02	0	983176599.8125	547838115.128975	660177313.633276	983176599.8125	525740208.9375	505905751.25
High	G1MHV7	0.000	233.284	41	27	89	3	910	102.1	8.24	224.35	0	13599056.5	14888568.1550486	25953785.5565005	13599056.5	14288014.5	19888852.75
High	G1M213	0.000	233.233	51	26	86	18	619	71.8	8.66	229.80	7	1306763816.8125	792810616.456238	1003499513.04961	1306763816.8125	760831361.734375	768999728.625
High	G1LID2	0.000	232.891	52	20	528	20	464	51.5	6.15	1485.98	0	8083177243.05859	12005497077.5076	36800535566.7669	8083177243.05859	11521236598.2266	28200912403.1328
High	G1L3L1	0.000	232.829	60	29	65	29	581	63.3	5.88	175.76	0	590074885.875	358753511.834799	155386144.996929	590074885.875	344282628.5	119075198.125
High	G1M524	0.000	232.779	43	29	98	1	700	76.7	9.50	233.82	27	800193763.4375	1003990216.08437	1037746489.47001	800193763.4375	963492702.3125	795243802.71875
High	D2H7X7	0.000	232.237	43	28	73	28	737	83.7	6.23	194.94	0	294468552.125	230117947.913049	207251003.912803	294468552.125	220835781	158820172.5
High	D2I2U6	0.000	232.218	84	18	274	18	297	33.0	6.23	767.57	0	10983637300.9063	10334285740.7126	5482576934.84976	10983637300.9063	9917436181.42188	4201397330.28125
High	G1M9E7	0.000	232.170	45	27	83	3	786	88.5	8.54	216.19	22	250669363.125	412291630.812033	853900534.761288	250669363.125	395661203.8125	654359340.453125
High	D2H8Q9	0.000	232.067	52	22	282	22	379	43.5	9.42	661.42	0	7983743196.8125	10554592980.0733	2834581593.89407	7983743196.8125	10128856984.125	2172190866.1875
High	G1LNV1	0.000	231.981	50	32	88	32	832	94.3	6.71	265.88	0	673009530.375	653762498.152925	174694299.824047	673009530.375	627391966.5	133871384.5
High	G1LBM4	0.000	231.859	33	32	65	31	1414	156.7	5.35	172.79	0	249831634	235366510.118777	41554712.1557512	249831634	225872634.25	31844123.4453125
High	D2I7H6	0.000	231.785	56	16	192	16	392	42.4	5.20	577.54	0	2987312963.5625	404909733.51527	5137526436.27604	2987312963.5625	388577066.875	3936978926.17188
High	D2H4V6	0.000	231.740	66	21	76	1	469	53.0	5.44	248.54	0	26061167	12775869.6608867	7141770.88339804	26061167	12260535	5472867.5
High	G1LXZ0	0.000	231.560	67	18	90	18	451	48.3	8.41	291.34	0	625914024.625	895815751.571028	785426804.738689	625914024.625	859681623.8125	601886689.375
High	D2HYX8	0.000	231.417	27	33	55	29	1709	190.5	6.79	163.50	3	151198123.1875	257833045.677132	63772402.3679286	151198123.1875	247432947	48869939.125
High	G1M4Q5	0.000	231.382	65	14	152	8	340	37.4	6.00	454.34	0	2069448667.30469	1874930683.816	2169889542.86342	2069448667.30469	1799302425.71875	1662825390.45508
High	G1LUM7	0.000	231.316	60	16	125	11	469	52.3	5.24	355.70	6	1862561678.5625	2256697725.5491	2518861134.05714	1862561678.5625	2165670297.4375	1930248598.375
High	G1LE36	0.000	231.315	60	18	119	5	319	37.5	4.64	413.40	10	1323531868.125	1914244812.58406	4410703897.38475	1323531868.125	1837030757.6875	3380001739.9375
High	D2H1B9	0.000	231.106	50	23	99	23	596	64.1	8.21	253.93	0	752392933.6875	752630328.182024	353271329.524461	752392933.6875	722271808.15625	270718174.75
High	G1LS88	0.000	231.014	56	20	108	20	400	45.1	7.74	326.69	0	677253318.25	872428559.552373	2401527876.92832	677253318.25	837237790.71875	1840334012.75
High	G1L844	0.000	230.889	52	18	355	15	549	58.7	9.23	1087.25	1	4219204175.0625	3992719687.1407	7848932013.97743	4219204175.0625	3831667101.24219	6014777795.35938
High	G1M134	0.000	230.749	51	33	81	33	842	96.1	5.15	217.03	0	318662647.375	1242336512.73536	319779363.477936	318662647.375	1192224928.75	245052678.6875
High	D2H5T8	0.000	230.746	22	39	75	37	2296	257.6	6.07	171.03	2	165791650.875	242091370.23183	169531632.536833	165791650.875	232326236.625	129915139.6875
High	G1LZU4	0.000	230.555	37	22	68	21	889	97.9	4.75	202.78	1	281703324.625	222677732.449422	227421368.370437	281703324.625	213695678.25	174277085.625
High	G1LVZ7	0.000	230.515	29	34	74	34	1485	166.1	7.14	179.22	0	164900067.0625	192327427.616571	521428062.766396	164900067.0625	184569600.375	399579704.375
High	G1M3B6	0.000	230.377	31	24	69	1	988	108.1	4.91	177.04	0
High	D2HJ09	0.000	230.352	56	23	46	1	592	67.2	5.95	138.86	0
High	G1LSP5	0.000	230.050	45	21	93	9	524	58.4	5.44	295.03	11	1276439201.375	1046881628.78181	750144836.180143	1276439201.375	1004654022.875	574849482.1875
High	D2I7J7	0.000	229.681	44	22	82	22	743	83.3	7.42	245.24	0	781207328.3125	573983430.160519	271413725.644707	781207328.3125	550830911.84375	207989220.375
High	D2HYB7	0.000	229.600	51	23	65	23	580	64.5	6.54	188.57	0	174526687.8125	242523773.258395	441111867.632396	174526687.8125	232741198	338031959.25
High	G1MIF6	0.000	229.544	43	28	98	28	963	110.0	5.39	277.27	0	1042931836	481017835.45084	356036471.043264	1042931836	461615229.625	272837152.4375
High	G1LFS9	0.000	229.503	31	36	69	36	1408	157.2	5.73	161.14	0	110145376.625	141424658.531613	319667630.447394	110145376.625	135720074	244967055.65625
High	G1MG66	0.000	229.414	32	19	155	19	798	88.1	5.34	449.96	0	1042614945.875	1317864756.52262	3070152363.77749	1042614945.875	1264706622.83594	2352712984.79004
High	G1M6Z3	0.000	229.411	37	23	90	15	748	84.1	5.21	221.52	3	743710367.5	606064990.612018	246356585.814944	743710367.5	581618412.4375	188787483.375
High	D2HEP4	0.000	229.286	62	13	190	11	225	24.8	4.73	631.64	0	4553539757.5625	4703546909.92698	4621581944.89871	4553539757.5625	4513821997.5625	3541601381.19531
High	G1LID6	0.000	229.276	53	28	99	28	673	75.6	6.73	229.35	0	869104777.125	829202920.92362	194733677.372246	869104777.125	795755725.75	149227920
High	G1LUC8	0.000	229.218	53	34	123	26	786	89.4	6.71	271.04	0	253544195	264167743.288686	542977599.630805	253544195	253512124.6875	416093502.125
High	G1LLW1	0.000	229.148	72	16	102	16	279	31.2	7.43	289.11	0	1144560073	712459254.385016	2164624110.85421	1144560073	683721097.375	1658790395.1875
High	D2HBR6	0.000	229.037	30	26	66	26	1414	155.7	7.40	181.73	0	48955607.875	90397524.1011648	388038570.426534	48955607.875	86751198.75	297360936.875
High	D2H0R6	0.000	228.987	43	24	84	23	731	83.3	6.00	220.34	1	834890945.375	454493746.383084	405776562.289257	834890945.375	436161031.125	310953879.125
High	D2H9Z8	0.000	228.971	49	25	112	25	504	57.7	5.85	283.09	0	1523306521.65625	1716138793.64692	399044911.215238	1523306521.65625	1646915654.5	305795293.8125
High	G1MDC3	0.000	228.803	71	21	62	21	351	39.7	4.87	210.06	0	507109277.125	519769347.084122	271263580.076316	507109277.125	498803638.5	207874161.125
High	G1LJE3	0.000	228.727	57	15	107	15	322	36.7	6.77	354.48	0	1416104728.25	2009281952.56623	980519167.74015	1416104728.25	1928234426.16406	751389476.625
High	D2HIS0	0.000	228.707	61	32	85	32	608	68.9	5.77	206.54	0	1133229697.8125	833270401.057683	273554472.810279	1133229697.8125	799659137.71875	209629713.4375
High	G1LNC5	0.000	228.493	45	40	111	39	1026	115.6	8.46	265.20	1	434954174.875	672862825.214201	759101848.853227	434954174.875	645721852.03125	581713402.125
High	G1L6H6	0.000	228.288	48	27	85	27	710	82.1	6.84	225.54	0	645383925.25	605351871.396964	284686215.196495	645383925.25	580934058	218160167.875
High	G1M5T4	0.000	228.244	38	19	111	17	865	93.4	8.59	312.58	2	1789117134	1738224599.63322	3613151748.20939	1789117134	1668110595	2768823181
High	G1LS78	0.000	227.992	42	27	235	13	579	68.7	6.10	489.83	0	1166758379.125	938453568.460394	1281906777.2164	1166758379.125	900599577.75	982348223.375
High	G1MNS5	0.000	227.937	65	20	59	20	440	49.1	6.96	164.78	0	636045324.125	680607671.533007	58982396.9575924	636045324.125	653154297.875	45199271.8125
High	D2H7U8	0.000	227.900	69	22	165	22	342	39.4	5.72	477.40	0	3192528432.375	3929650266.89345	3648614354.329	3192528432.375	3771141684.58594	2795998814
High	G1LZN8	0.000	227.798	42	18	319	16	363	37.7	8.94	758.60	0	7438912203.95313	7486741763.35866	9325503424.63112	7438912203.95313	7184752338.75	7146301029.125
High	G1LZ42	0.000	227.596	69	15	113	15	218	25.1	8.72	332.63	0	2126389979.5	3397179554.14119	1513423656.17549	2126389979.5	3260149009.84375	1159763772.4375
High	G1MGX5	0.000	227.511	28	37	131	37	1084	122.3	8.65	251.86	0	1060944040.73438	1114045049.52849	1456582387.22243	1060944040.73438	1069108302.125	1116205285.53125
High	G1LQT4	0.000	227.477	33	38	83	38	1416	162.1	7.03	182.42	0	224779733.375	441296672.934425	614121666.757872	224779733.375	423496282.25	470612480.5625
High	G1M184	0.000	227.305	49	19	87	19	588	66.6	7.05	248.15	0	613243640.75	565004902.632933	419328324.695945	613243640.75	542214547.25	321338838.4375
High	G1M9K7	0.000	227.187	44	32	78	31	889	103.2	6.37	190.50	1	492851464.375	385940533.31711	299434884.983185	492851464.375	370373019	229462338.84375
High	D2HRI2	0.000	227.168	44	26	104	2	643	72.1	5.10	268.85	25	2571611103.3125	2138316945.96719	83084332.7980505	2571611103.3125	2052064591.53125	63669018.8125
High	G1M4Y2	0.000	227.156	35	34	65	34	1364	148.5	5.27	174.84	0	418617793.875	289885667.7606	123783404.142969	418617793.875	278192676.5	94857449.3125
High	D2HJX3	0.000	226.996	39	24	49	24	936	105.7	6.64	166.98	0	513287540	132986705.254647	557322123.343975	513287540	127622478.75	427085968.6875
High	G1LQV9	0.000	226.806	57	15	163	14	300	33.5	4.83	561.96	1	5203379596.8125	5399684532.58013	7748989658.58671	5203379596.8125	5181879821.71875	5938190170.57813
High	D2HKL0	0.000	226.752	56	24	87	24	435	49.0	5.11	269.81	0	1306902067.25	1422021791.13922	580244178.964097	1306902067.25	1364662320.75	444651552.25
High	D2GWZ9	0.000	226.732	47	25	67	23	691	77.7	5.50	190.13	0	321561163.5	272715607.559802	564614664.29174	321561163.5	261715197.5	432674374
High	G1LY44	0.000	226.673	51	25	146	25	525	59.1	7.34	347.81	0	1532950143.4375	2349372944.85709	2358406830.72007	1532950143.4375	2254607317	1807289579.34375
High	G1M692	0.000	226.652	27	37	80	34	1748	192.7	6.80	224.41	0	254063898.375	537417412.106109	61009847.5690368	254063898.375	515739841.25	46752943.6875
High	G1LV51	0.000	226.283	60	32	132	26	671	73.9	8.62	313.75	0	842106782	986080856.852229	614981979.574634	842106782	946305745.0625	471271753.75
High	D2H4P3	0.000	226.262	85	22	443	15	165	18.4	8.09	1284.35	9	10281270681.3203	11545480540.2505	18330775355.1379	10281270681.3203	11079775546.625	14047202903.7148
High	G1LBB1	0.000	226.069	39	33	80	33	1084	123.6	6.39	194.52	0	670387314.375	709307874.165877	133078196.959251	670387314.375	680696833	101980216.25
High	G1M7V2	0.000	226.058	65	10	76	1	135	15.1	7.02	246.79	11	1066642307.25	1314475203.52131	1622992080.82054	1066642307.25	1261453792.75	1243728027.25
High	G1M618	0.000	225.957	53	23	44	1	625	70.0	5.91	132.59	17	111328859.8125	87437230.4705854	651935970.656713	111328859.8125	83910313.1875	499590261.875
High	G1MAB4	0.000	225.954	52	29	90	27	644	72.4	8.40	211.00	2	540170394.0625	450496991.076679	326857111.616252	540170394.0625	432325491.1875	250476484.40625
High	D2H139	0.000	225.768	36	23	77	23	982	110.8	5.19	233.07	0	708613000	618062606.764372	314130675.693445	708613000	593132086	240723987.625
High	G1LFX8	0.000	225.680	37	22	61	22	894	95.9	5.96	187.47	0	150008134	255069265.391171	212890667.742682	150008134	244780648.109375	163141948.34375
High	G1M8T5	0.000	225.512	43	20	141	20	613	66.8	9.13	374.72	0	3122503437.99219	2293127502.89921	367427856.827066	3122503437.99219	2200630622.80859	281566576.28125
High	G1LAA9	0.000	225.333	37	35	69	18	1182	133.5	7.75	176.87	14	227810855.75	200789147.559122	176639946.437785	227810855.75	192690003.625	135362368.5
High	G1M6K7	0.000	225.294	53	29	96	27	636	73.6	8.06	252.85	2	528064474.5	629499502.833736	289811021.242784	528064474.5	604107657	222087398.9375
High	D2HEW4	0.000	225.275	55	21	78	21	491	57.5	5.77	227.02	0	1013036222	1129548595.13474	117281792.20097	1013036222	1083986488	89875147.125
High	G1MG29	0.000	225.235	62	21	112	19	347	39.6	6.76	329.65	2	1373354953.25	1361992006.30348	662488211.769988	1373354953.25	1307053931.0625	507676634.0625
High	D2H4F2	0.000	225.103	39	23	57	23	891	96.7	5.08	172.23	0	142940492.25	168958600.499928	879965027.03238	142940492.25	162143391.40625	674333029.75
High	D2HIT3	0.000	225.077	46	30	82	14	794	90.5	6.33	193.83	12	273578633.5	229779927.715328	744639442.532813	273578633.5	220511395.375	570630600
High	G1L9U5	0.000	224.970	49	30	118	1	648	74.9	7.05	305.81	0	83972884.5	81573528.9730687	92373675.5269532	83972884.5	78283133.25	70787609.25
High	G1LW85	0.000	224.785	26	42	78	38	2076	231.8	6.79	161.51	0	281823880.625	72878808.789302	410943421.945105	281823880.625	69939128.1875	314913336.625
High	G1LDL7	0.000	224.761	24	28	100	28	1465	149.6	9.10	284.71	0	1056143090.25	1144979373.56319	600059952.208992	1056143090.25	1098794841.875	459836735.75
High	G1LUQ7	0.000	224.735	49	27	158	27	606	71.1	7.06	363.38	0	2571571239.75	2568388777.87231	2069942032.31989	2571571239.75	2464788804.25	1586233815.1875
High	G1LPC4	0.000	224.712	63	24	158	24	429	47.5	7.91	371.85	0	2243894009.25	1920029064.02702	4058749532.9808	2243894009.25	1842581692.3125	3110292779.25
High	G1L152	0.000	224.654	25	40	85	37	1856	213.4	7.68	191.10	3	227349627.125	463183339.574089	152470034.410209	227349627.125	444500116	116840530.125
High	G1M6N8	0.000	224.491	68	24	127	24	392	43.7	5.83	274.15	0	1777004718.5	2273255895.05796	839390746.633609	1777004718.5	2181560567.3125	643240228.796875
High	D2HHT4	0.000	224.481	41	26	60	26	890	99.0	6.06	178.99	0	491437062.0625	420683742.106003	74622530.0189459	491437062.0625	403714806.1875	57184587.125
High	G1M9J1	0.000	224.426	36	33	70	32	1227	139.1	6.10	183.22	1	443856621.1875	580250539.525826	173358069.20251	443856621.1875	556845227.5625	132847406.9375
High	D2GXH3	0.000	224.314	57	18	130	16	318	34.1	9.86	372.01	2	1057971254.375	1313292403.82273	2501720157.00311	1057971254.375	1260318703.125	1917113159.3125
High	G1LCC4	0.000	224.229	32	32	75	31	1116	128.0	5.91	201.49	0	577272581.5	355355224.089896	1057509947.49546	577272581.5	341021416	810388896.125
High	G1MCG0	0.000	224.050	72	14	407	14	205	23.0	7.44	1130.22	0	30993212669.7773	27664156657.7298	21497570433.4693	30993212669.7773	26548279682.75	16473974939.1563
High	D2HFH3	0.000	224.026	52	25	106	24	586	66.1	7.84	283.15	1	1154735845.125	1264691250.76578	893544334.140234	1154735845.125	1213677953.5	684739097.0625
High	D2I616	0.000	223.945	77	26	150	26	376	42.7	5.94	369.34	0	2432652781.5625	3656450695.69324	2453411137.39252	2432652781.5625	3508962044.875	1880093088.5625
High	G1LU40	0.000	223.863	28	19	84	19	904	102.1	9.26	232.66	0	452659150.375	505822657.298871	484202076.568661	452659150.375	485419510.234375	371052761.5
High	G1L7N2	0.000	223.787	24	34	73	30	1697	193.1	8.05	166.37	0	267480862.625	358360127.435519	156650292.781046	267480862.625	343905111.875	120043937.3125
High	G1LP08	0.000	223.736	56	16	213	16	262	29.3	6.62	654.62	0	5664107455.15625	7213575540.10465	2490696799.4535	5664107455.15625	6922604701.84375	1908665762.125
High	G1MCQ4	0.000	223.729	60	25	89	23	578	61.9	8.32	210.60	0	397110849.25	475710232.363937	1320253826.74885	397110849.25	456521717	1011734257.25
High	G1LND0	0.000	223.714	68	23	306	23	343	39.1	7.69	779.99	0	5721113229.6875	6671199749.05357	11998393222.3646	5721113229.6875	6402106485.60938	9194584563.26953
High	G1LLU2	0.000	223.694	66	33	146	33	528	59.1	6.99	306.41	0	2082262944.1875	1786272946.2377	1666508269.25196	2082262944.1875	1714220836.48438	1277075265.25
High	G1L4A1	0.000	223.443	66	16	147	1	308	35.4	5.43	440.70	0	176375797	153920333.931782	136034852.969611	176375797	147711716.8125	104245954.9375
High	G1LH43	0.000	223.409	54	29	84	29	687	78.0	6.20	219.49	0	248028013.75	297644228.685727	252694303.082236	248028013.75	285638283.75	193644190.125
High	G1L0F5	0.000	223.260	65	18	477	13	245	27.7	4.79	1333.93	7	19101208321.2813	19043619706.0475	14115575205.4701	19101208321.2813	18275465555.7813	10817019202.5352
High	G1LZT6	0.000	223.210	51	27	208	23	512	56.4	5.68	479.00	4	2784877330.6875	1285523119.93938	19652219997.9485	2784877330.6875	1233669536.6875	15059849704.7344
High	G1LJ35	0.000	223.137	37	26	93	24	889	101.2	6.84	237.84	2	567364656.75	512802062.266918	630158992.472196	567364656.75	492117390	482902171.75
High	G1M090	0.000	223.064	37	35	73	34	1406	151.7	8.37	196.37	0	308750334	432485722.027883	456082562.539508	308750334	415040734.8125	349504272.0625
High	D2I054	0.000	223.062	33	26	82	26	928	103.1	8.13	208.86	0	1009758031.1875	729199511.42906	414332792.660504	1009758031.1875	699786110	317510672.375
High	G1L190	0.000	223.035	28	26	67	26	1201	136.6	5.54	189.66	0	677995095.125	1393648765.97047	606203945.637532	677995095.125	1337433765.875	464544988.4375
High	G1LWZ7	0.000	222.903	45	35	122	1	866	101.1	7.12	240.24	0	79232744	87818321.1718504	48622028.7053809	79232744	84276032	37259935.25
High	D2HNC1	0.000	222.853	37	29	55	29	1045	116.2	6.49	164.49	0	395093661.75	234077813.26814	103517170.255383	395093661.75	224635919	79327069.71875
High	G1LFY3	0.000	222.676	36	21	94	21	573	64.0	7.28	252.74	0	695239607.9375	875099251.978462	1115228254.90194	695239607.9375	839800756.59375	854619473.375
High	D2HRD8	0.000	222.662	26	24	58	24	1118	124.6	5.76	156.97	0	238842875.5	246320265.972808	147566355.399265	238842875.5	236384553.25	113082752.6875
High	D2HPL8	0.000	222.557	22	43	74	42	2691	304.1	7.36	149.00	1	264871725.25	176297373.465682	185410635.594285	264871725.25	169186143.5	142083505.375
High	D2GV44	0.000	222.446	71	15	65	15	308	34.4	5.06	263.14	0	915647880.8125	1028698848.04099	1005451215.08037	915647880.8125	987204673	770495353
High	G1MDS9	0.000	222.416	54	21	110	21	578	59.1	7.47	360.57	0	1102906187.3125	977694470.09124	596996155.215781	1102906187.3125	938257636.3125	457488893
High	G1LWV1	0.000	222.311	22	34	109	18	1670	186.8	7.88	256.03	0	143407338.75	143259969.41309	306170303.871338	143407338.75	137481354.75	234623811.5
High	G1MCH6	0.000	222.304	82	20	280	19	316	35.8	7.21	638.20	1	15925523685.5	18352362368.3103	11348207598.0883	15925523685.5	17612091162.625	8696335623.3125
High	G1LIA6	0.000	222.275	41	25	101	1	636	71.1	4.74	254.43	0	4916078.5		5461305.30803295	4916078.5		4185096.5
High	G1MG26	0.000	222.259	75	21	208	21	344	38.6	5.48	521.97	0	5325275407.5	6819644504.55364	9164189324.46944	5325275407.5	6544563490	7022683132.32031
High	D2GXI3	0.000	222.257	51	23	81	23	620	71.6	5.53	249.70	0	323796928.5625	384438426.100998	355041096.393151	323796928.5625	368931501.625	272074378.9375
High	G1L7U7	0.000	222.253	39	27	66	27	953	108.1	7.01	190.56	0	634861950.125	389342063.084036	185323762.225825	634861950.125	373637342.75	142016932.75
High	G1M5H5	0.000	222.246	32	35	80	34	1357	153.9	8.28	206.02	1	557373098.9375	444154971.757615	357495418.264009	557373098.9375	426239287.125	273955169.9375
High	G1MHI6	0.000	222.201	66	16	145	1	309	35.6	5.54	440.21	15	2372900404.875	2349274935.6918	1345687257.49727	2372900404.875	2254513261.1875	1031224352.75
High	G1LPU6	0.000	221.996	58	17	271	11	245	27.8	4.87	690.78	1	10541939665.793	6913981630.8838	5240425631.49034	10541939665.793	6635095380.96875	4015832430.5
High	D2HAW9	0.000	221.877	61	32	119	32	605	67.3	6.37	263.27	0	922444260.5625	942094555.354624	545642235.426301	922444260.5625	904093699.75	418135460.46875
High	G1L6D0	0.000	221.594	57	25	99	25	617	68.8	7.56	253.94	0	874838377.6875	793877965.474394	820159911.679232	874838377.6875	761855657.5625	628503294.03125
High	G1L2G5	0.000	221.407	52	24	155	24	535	60.1	7.23	404.63	0	5700557660.22656	4696421085.9996	1043824041.60787	5700557660.22656	4506983604.875	799901140.25
High	G1LJ73	0.000	221.337	65	26	159	26	485	53.8	7.05	453.05	0	715077953.75	587658212.330465	9374993026.34716	715077953.75	563954100.3125	7184225801.17969
High	D2I671	0.000	221.287	74	23	140	23	413	46.3	7.49	352.63	0	4486850655.41406	3249478130.77587	2230343668.59271	4486850655.41406	3118405354.125	1709152474.5
High	G1L4E0	0.000	221.263	68	12	61	4	113	12.8	7.37	200.40	0	29453978.75	64398322.6972971	9868803.63022134	29453978.75	61800715.75	7562641.75
High	G1LVF9	0.000	221.262	57	25	94	25	585	65.2	8.91	244.04	0	777319522.25	707964405.899629	988130326.665126	777319522.25	679407555.625	757222044.625
High	G1MFG4	0.000	221.114	39	29	145	29	813	90.3	6.40	343.82	0	2351347161.98438	1719365916.98952	1242074668.3837	2351347161.98438	1650012606.78125	951824161.84375
High	G1LEJ1	0.000	220.576	80	15	210	15	261	27.1	8.27	688.91	0	2743250866.82422	3669446723.47915	3401977518.78824	2743250866.82422	3521433857.57813	2606996570.21875
High	D2HF04	0.000	220.495	53	20	160	1	505	57.3	7.83	400.56	0	3152325			3152325
High	G1MFZ8	0.000	220.427	28	34	59	33	1897	203.6	6.34	143.56	0	121212396.875	72670281.0600878	219774577.696763	121212396.875	69739011.75	168417212.375
High	D2HSL9	0.000	219.921	43	23	72	4	690	79.6	7.05	206.64	18	231651932.5	349911045.517428	432260856.973077	231651932.5	335796836.875	331249270.5625
High	D2GWA3	0.000	219.893	24	40	58	40	2219	250.0	5.39	115.63	0	245274656	228256548.914099	62611864.558597	245274656	219049464.4375	47980598.125
High	D2HWQ5	0.000	219.802	25	32	87	32	1836	197.4	7.47	216.59	0	351700673.625	366464678.18183	308454668.147047	351700673.625	351682752.90625	236374360.9375
High	G1MC53	0.000	219.712	47	21	158	21	651	74.5	6.37	340.92	0	1516380696.875	1288545765.5729	817094732.467717	1516380696.875	1236570259.1875	626154392.0625
High	G1KZX8	0.000	219.701	52	19	65	4	541	61.1	6.89	205.74	12	637101604.25	596393971.576415	306678052.538569	637101604.25	572337489.0625	235012908.4375
High	D2HG83	0.000	219.540	41	20	191	20	647	69.1	7.59	517.04	0	4599895352.25	5133303388.59801	2227885837.40843	4599895352.25	4926243577.3125	1707268994.25
High	G1LA67	0.000	219.435	42	22	68	20	766	84.9	6.25	207.66	2	469372616.625	257727807.186981	593244968.520861	469372616.625	247331953.46875	454614291.15625
High	G1L8F0	0.000	219.367	28	38	92	37	1805	200.0	6.54	216.22	1	418185092.375	252228658.268483	507070276.282225	418185092.375	242054621.3125	388577074.3125
High	D2HQR8	0.000	219.184	59	25	106	25	539	58.2	7.23	280.15	0	995506918.5	874869993.478734	709734794.083827	995506918.5	839580745.59375	543882540
High	G1L675	0.000	219.123	63	18	275	18	346	38.1	6.28	709.10	0	18028812809.7813	23165566274.6143	2245593895.87492	18028812809.7813	22231146970.3125	1720838998
High	D2HPA6	0.000	218.973	75	23	155	22	381	43.1	7.25	411.69	0	2343010091.1875	904010988.277197	1793822683.6966	2343010091.1875	867546292.84375	1374638591.27539
High	G1LBR6	0.000	218.962	35	26	68	26	980	112.9	5.25	196.35	0	124917412.125	164611524.752523	146780535.483404	124917412.125	157971661.75	112480564.75
High	D2H4B8	0.000	218.887	37	28	71	28	929	100.7	5.77	181.42	0	179757002.5625	327133564.096974	483348133.415108	179757002.5625	313938120.75	370398369.5
High	D2I1J8	0.000	218.652	39	29	67	29	851	97.9	5.11	184.92	0	398243882.25	443790591.016183	275060924.706669	398243882.25	425889604.25	210784134.625
High	G1MHG2	0.000	218.604	74	17	498	16	295	32.1	8.63	1534.46	1	8656184049.18359	9136476042.91309	11390574027.6071	8656184049.18359	8767942008.96875	8728801780.375
High	G1LM04	0.000	218.450	48	19	115	19	513	57.5	7.18	346.60	0	907407598.875	686536247.011387	824435504.780318	907407598.875	658843735	631779757.9375
High	G1LUZ4	0.000	218.328	37	27	75	27	841	91.9	5.64	175.14	0	343316811	352775259.565452	58307667.511016	343316811	338545518.375	44682214.5
High	D2HT94	0.000	218.241	24	32	56	27	1754	199.4	6.51	142.32	0	87940024.125	162961631.479956	441469721.035291	87940024.125	156388319.5	338306188.75
High	G1L0B6	0.000	218.227	32	30	64	30	1359	151.3	5.57	171.88	0	145290728.4375	169138132.614478	20193478.6383762	145290728.4375	162315681.8125	15474625.9375
High	D2GU13	0.000	218.169	24	37	63	37	2060	233.4	6.35	165.47	0	126617243	111865376.592912	341483623.073938	126617243	107353111.875	261685043.25
High	D2H636	0.000	218.146	39	29	75	25	989	112.7	9.01	188.03	4	194805477.25	290642289.987601	730225802.195379	194805477.25	278918779.1875	559585168.125
High	D2HIR6	0.000	218.012	54	27	69	21	744	81.7	6.14	190.05	0	95339132.75	55202661.3308712	353694463.921316	95339132.75	52975975.75	271042430.25
High	G1M6P3	0.000	217.914	53	30	93	30	589	67.5	4.88	240.30	0	1155271011.46875	629607543.836356	61144902.5514456	1155271011.46875	604211340	46856438.75
High	G1MGV3	0.000	217.787	46	18	103	11	502	55.6	4.83	310.83	7	846950696.28125	888173636.960414	991344730.566173	846950696.28125	852347765.833008	759685300.157715
High	G1LR08	0.000	217.779	42	20	73	19	630	70.7	5.90	181.27	1	420763290.5	502416891.036925	824883846.483777	420763290.5	482151120.875	632123330.25
High	G1LSZ7	0.000	217.774	48	26	78	2	740	83.1	6.84	217.90	21	290576362.8125	348835146.512838	452818666.661451	290576362.8125	334764335.9375	347003089.9375
High	D2GU95	0.000	217.769	52	19	110	15	479	52.7	5.05	339.94	4	1520603502.4375	1512508505.62383	240881361.350431	1520603502.4375	1451499112.25	184591720.375
High	G1LE83	0.000	217.735	61	23	71	21	523	58.0	7.99	193.72	2	421983551.75	594302405.686352	287163923.328358	421983551.75	570330289.75	220058880.1875
High	G1MD31	0.000	217.702	34	25	321	25	717	77.5	4.67	784.76	0	10227557360.0313	10927067137.3657	14176969493.8923	10227557360.0313	10486306814.4141	10864066750.1641
High	G1LUQ9	0.000	217.591	70	15	137	12	329	36.5	6.95	365.25	0	1729301948.25	1826208862.57562	420426695.264399	1729301948.25	1752545875.25	322180539.5625
High	D2I3V5	0.000	217.544	57	24	88	23	492	53.3	5.25	255.74	0	717743157.875	688639531.104735	306345092.114539	717743157.875	660862179.84375	234757754.875
High	D2H1X7	0.000	217.525	59	18	93	18	474	50.4	7.02	278.39	0	985544644.75	1424120595.37423	659108531.385637	985544644.75	1366676466.4375	505086724.1875
High	D2HHI9	0.000	217.420	65	22	135	22	439	50.6	6.48	370.85	0	946368493	1103937497.60049	1672966025.17499	946368493	1059408454.09375	1282023959.78125
High	G1LH50	0.000	217.351	71	31	218	31	428	48.8	6.30	492.33	0	4246196393.125	3627260868.54048	5263064981.93368	4246196393.125	3480949635	4033181372
High	G1LUI0	0.000	217.280	44	26	93	26	735	83.6	6.99	226.43	0	577535096.25	611418929.539954	452301659.435627	577535096.25	586756391.875	346606898
High	G1L7W6	0.000	217.209	33	19	71	19	733	81.9	6.06	212.29	0	1014591301.61719	2778362976.6979	4113577616.98159	1014591301.61719	2666293365.75	3152308526.3125
High	G1L3Y0	0.000	217.188	46	26	100	26	737	82.7	7.88	240.76	0	724952917.125	729228142.299965	690530766.559165	724952917.125	699813586	529166148.25
High	G1L6F6	0.000	217.090	35	38	85	33	1543	168.0	8.28	189.09	5	456055655.75	403399869.282784	502526517.456534	456055655.75	387128105.375	385095110.1875
High	G1LRY5	0.000	217.062	30	33	70	33	1507	168.9	5.06	166.93	0	229353523.5625	437162332.608839	183709714.900772	229353523.5625	419528707	140780059.25
High	G1L8E4	0.000	217.023	37	30	102	30	994	111.5	7.66	252.96	0	271495157.875	388754041.307071	704286438.197763	271495157.875	373073039.75	539707366.875
High	D2H8T8	0.000	217.015	65	22	71	22	356	40.5	8.34	197.36	0	293895507.8125	375506888.712843	407890707.899995	293895507.8125	360360231.75	312573986.9375
High	G1M241	0.000	216.825	56	22	131	22	472	51.0	8.40	350.62	0	2666872600.625	3587944441.01728	2355273840.39651	2666872600.625	3443219097	1804888712.5
High	G1LVP6	0.000	216.821	46	24	108	22	643	70.9	7.87	303.41	0	693246545.3125	855495765.818285	385674465.510006	693246545.3125	820988007.671875	295549280.75
High	G1L8U5	0.000	216.524	37	33	58	33	1258	138.1	5.29	145.30	0	246552849.5625	339813461.699982	812942440.457207	246552849.5625	326106554.875	622972416
High	G1LLQ3	0.000	216.387	33	35	100	35	1310	147.0	6.16	209.19	0	481692718.625	478002265.865787	513461942.351585	481692718.625	458721297.75	393475123
High	G1LM14	0.000	216.375	46	31	82	31	799	89.5	8.13	187.97	0	1589178948.25	933671800.8306	123734360.941519	1589178948.25	896010690.1875	94819866.625
High	G1LA86	0.000	216.248	63	18	152	18	364	40.0	5.08	405.82	0	3076297243.375	2783027857.26723	1955929992.24734	3076297243.375	2670770081.07422	1498864337.9375
High	D2HAI6	0.000	216.226	60	19	66	19	457	51.9	6.32	215.74	0	518254926.4375	420892576.322876	260784882.274463	518254926.4375	403915216.75	199844146.5
High	G1LVV1	0.000	216.213	25	29	90	29	1233	137.1	5.34	233.49	0	417887946	445236838.214822	319253310.154277	417887946	427277514.808594	244649554.5625
High	G1M2M8	0.000	216.212	28	29	71	29	1378	150.5	8.87	170.90	0	188439296.858398	179622340.744337	612383334.865068	188439296.858398	172376993.029297	469280365.5625
High	G1LUC7	0.000	216.177	35	32	71	32	1091	122.9	5.03	195.02	0	1692545885.3125	1522191863.75097	225482010.921341	1692545885.3125	1460791877	172790921.125
High	G1LI97	0.000	215.950	60	22	98	21	370	41.5	8.18	290.03	1	1009315523.625	1077208653.96878	1489969033.61716	1009315523.625	1033757760.125	1141790073.25
High	G1LG69	0.000	215.843	37	22	135	19	583	65.8	6.01	339.44	0	2117755252.75	2055758966.48886	2859479141.19595	2117755252.75	1972836717.125	2191270304.5625
High	G1MJJ2	0.000	215.662	36	33	92	33	1057	120.5	5.39	218.11	0	1130460359	769738615.52172	1040376778.4762	1130460359	738690006	797259440.5
High	G1LM09	0.000	215.413	46	29	113	29	762	86.4	6.04	294.45	0	922419067.625	810579003.365122	608994014.226792	922419067.625	777883033	466683068.1875
High	D2H6J1	0.000	215.253	43	26	103	26	768	88.8	5.38	260.33	0	612254268	865638883.90994	583771318.368917	612254268	830721987.25	447354462.625
High	D2H273	0.000	215.135	68	20	195	3	277	31.3	5.72	465.55	0	179205877.5	101065086.130179	3665296.64051627	179205877.5	96988468	2808782.75
High	G1MNK2	0.000	215.041	45	22	73	22	608	70.3	6.67	209.58	0	377107802.625	394419973.925396	283831801.57082	377107802.625	378510428.125	217505415.34375
High	G1LEY9	0.000	215.006	62	21	85	21	590	64.3	6.00	267.34	0	477427470.875	328517168.960578	692375257.384926	477427470.875	315265915.75	530579614.75
High	G1MBJ4	0.000	214.841	56	23	102	23	520	56.4	8.27	268.97	0	1640300462.625	2223338488.59817	474852146.964366	1640300462.625	2133656657.42188	363887742.25
High	G1L139	0.000	214.675	49	31	91	19	857	97.2	9.16	219.70	3	141330517.25	129638870.744796	266701966.635831	141330517.25	124409684.375	204378514.6875
High	G1LXJ9	0.000	214.608	60	18	85	18	360	40.1	5.49	246.64	0	1669972825.5	1604536148.55191	6895061.20770533	1669972825.5	1539814676.4375	5283809.4375
High	G1L600	0.000	214.506	54	17	125	14	395	43.6	6.48	300.94	3	1426016751.75	1608484941.73098	1434074031.31428	1426016751.75	1543604188.875	1098956727.5
High	D2H676	0.000	214.479	41	27	71	27	707	82.4	5.19	196.87	0	1056136512.75	669779329.569155	296936999.15554	1056136512.75	642762734	227548164
High	G1LTN5	0.000	214.469	59	22	74	22	462	50.7	7.58	199.70	0	993379343.875	898110525.421625	1012064136.88492	993379343.875	861883834.375	775562953.9375
High	G1L746	0.000	214.459	49	29	78	29	692	78.4	7.71	202.86	0	537889651.6875	586005429.17756	232513117.806586	537889651.6875	562367984.75	178178984.8125
High	D2HBG7	0.000	214.435	34	24	77	24	991	108.8	6.15	229.33	0	693247139.375	698556017.740712	77639219.6095827	693247139.375	670378669.5	59496330.625
High	G1L5I1	0.000	214.373	68	34	73	34	620	68.3	7.20	189.86	0	625224767.125	665988895.228721	95437198.4009313	625224767.125	639125192.75	73135241.9375
High	D2H490	0.000	214.164	43	29	81	29	780	88.4	5.35	217.51	0	377700957.6875	653101693.48628	210878475.93231	377700957.6875	626757816.421875	161599969.5625
High	D2GX21	0.000	214.139	38	25	75	1	857	96.2	8.63	199.23	0	3181764.75	10268566.1572254	5835007.87560527	3181764.75	9854367.5	4471471.5
High	D2GZH1	0.000	214.047	72	16	125	15	297	33.7	7.81	380.38	2	2903628051.625	2805890437.06443	2335275746.90952	2903628051.625	2692710463	1789563813.71875
High	G1LYJ1	0.000	214.026	39	21	91	21	703	75.9	5.05	284.21	0	1126050754.8125	1188498938.83865	389802434.066974	1126050754.8125	1140558977.5	298712617.3125
High	G1L7P8	0.000	214.013	31	27	69	26	1315	143.6	6.27	180.23	1	261729229.9375	309516564.91414	161961624.8545	261729229.9375	297031730.75	124114106.625
High	G1LM49	0.000	213.988	65	17	137	3	294	32.5	9.04	390.30	13	4161666445.85156	3132892299.65021	990806087.696979	4161666445.85156	3006522194.625	759272528.4375
High	G1LEV4	0.000	213.915	43	21	212	19	374	41.2	9.41	463.28	2	7657481345	8655550228.55816	9743862872.12194	7657481345	8306415088.625	7466897399.53125
High	D2HFV6	0.000	213.726	44	29	94	29	783	88.2	6.28	247.13	0	495298991.5	787447895.233862	659638232.428051	495298991.5	755684954.25	505492643.625
High	G1M0C4	0.000	213.663	31	40	71	33	1673	187.3	6.83	153.81	5	348352868.25	559300692.40232	437301333.144637	348352868.25	536740425.25	335111878.125
High	G1M1M3	0.000	213.655	35	25	54	25	876	96.1	8.02	167.00	0	303470437.875	329813738.623393	80202622.3401088	303470437.875	316510186.25	61460712.25
High	D2HJL1	0.000	213.610	58	20	54	20	542	59.2	6.19	165.33	0	84304692.625	658900879.803855	1369180637.87276	84304692.625	632323083.5	1049227752.75
High	D2I590	0.000	213.570	72	17	102	10	276	31.9	8.31	225.65	7	435800812.4375	556006626.352292	1493746030.95014	435800812.4375	533579230.5	1144684454.25
High	D2GVD4	0.000	213.501	66	33	108	30	578	65.5	6.15	223.22	2	1350126310.625	1187067273.50595	507082017.981012	1350126310.625	1139185060.625	388586072.1875
High	G1LB19	0.000	213.305	43	13	72	12	403	43.5	5.10	247.76	0	492540149.5	682983583.790499	862102340.605659	492540149.5	655434374	660644531.8125
High	D2HZ72	0.000	213.002	64	22	88	2	458	50.0	8.41	230.94	19	484303680.75	1017837639.21595	1333460215.80353	484303680.75	976781568	1021854550.75
High	G1LE40	0.000	212.485	50	34	94	34	630	71.3	8.40	214.56	0	893499219.3125	581850223.431389	243399809.260631	893499219.3125	558380385.71875	186521652.3125
High	D2I1E1	0.000	212.317	53	22	59	22	594	65.3	8.82	148.87	0	227912272	175566161.123584	251663047.928988	227912272	168484425.75	192853920.75
High	G1KZV4	0.000	212.283	34	15	155	15	447	51.7	5.68	458.41	0	4636454402.75	4907635571.73525	3771822288.24429	4636454402.75	4709678424.375	2890415270.125
High	D2H3S2	0.000	212.155	85	16	145	16	241	25.6	7.81	404.97	0	3791841774	3212676689.94311	1155163014.04743	3791841774	3083088356.89844	885222197.6875
High	G1MAK3	0.000	212.086	25	30	66	30	1536	175.7	6.60	182.32	0	205604526	290228273.029323	323189979.290328	205604526	278521462.25	247666294.9375
High	G1MDG0	0.000	211.932	48	20	110	16	527	59.6	8.50	293.12	0	541539558.25	673530681.457845	486116971.180171	541539558.25	646362769.25	372520179.6875
High	G1LAK4	0.000	211.928	38	21	85	21	523	58.1	6.40	243.11	0	943771920.035156	1034527240.28459	423968464.774036	943771920.035156	992797967.9375	324894661.25
High	G1M2A0	0.000	211.686	35	28	105	28	1029	118.2	8.47	244.32	0	820237058.625	958231685.684201	988577118.506104	820237058.625	919579913.71875	757564429.25
High	G1LRI0	0.000	211.641	60	22	124	22	498	55.1	7.01	305.59	0	1776872118	800052734.36099	1041191640.35027	1776872118	767781357.5	797883883.8125
High	G1LP74	0.000	211.571	47	26	65	25	761	85.4	8.12	187.65	0	186821355.625	288258773.566803	739828925.239383	186821355.625	276631405.625	566944214.0625
High	D2HEU6	0.000	211.562	47	22	104	21	729	80.8	5.25	285.41	1	1434563654.5	1440994998.27601	863172074.644865	1434563654.5	1382870213.9375	661464288.25
High	G1LTL9	0.000	211.534	30	32	54	1	1289	143.1	9.92	134.18	24	245382879.75	675993925.504479	124820958.981948	245382879.75	648726654.5	95652546.25
High	G1LKD0	0.000	211.283	47	28	83	28	667	75.6	6.38	204.44	0	596866055.625	926387501.031363	400600313.25445	596866055.625	889020214	306987226.375
High	F2X229	0.000	211.161	61	16	218	2	317	34.3	5.97	675.35	14	3262878210.25	3042346211.42033	5920812472.03217	3262878210.25	2919628424.3125	4537225105.76563
High	G1LC71	0.000	211.144	44	26	94	22	773	85.4	6.84	259.37	4	1218192700.75	1011087752.49038	936326399.373827	1218192700.75	970303948.5	717523763.25
High	G1L7L8	0.000	211.062	33	31	76	30	1120	128.1	5.77	164.24	1	459312976.75	615355429.021014	436392255.731395	459312976.75	590534106.5	334415235.75
High	G1MAB6	0.000	211.044	58	13	56	13	404	41.9	7.42	220.63	0	830201331	910685595.909172	1796283615.22517	830201331	873951669.75	1376524447.375
High	D2Y399	0.000	211.044	68	12	60	4	113	12.7	7.44	205.42	7	4129294304.375	1162165466.46816	503107632.53408	4129294304.375	1115287706.875	385540429.125
High	G1LSV4	0.000	210.910	42	20	79	20	590	65.9	5.52	227.98	0	402152135.75	357833514.687675	585026721.496642	402152135.75	343399740.875	448316500.625
High	G1MMT5	0.000	210.848	48	26	70	26	655	72.2	6.87	178.21	0	241311916.125	304236292.177093	128242316.663407	241311916.125	291964446.0625	98274394.1875
High	G1L5D9	0.000	210.687	58	18	64	18	417	46.9	7.14	218.03	0	798724681.375	460111693.819121	179128980.155276	798724681.375	441552369.875	137269759.8125
High	G1LFR9	0.000	210.492	67	25	104	25	324	36.5	6.55	295.64	0	948408652	877957395.310941	2322243950.07138	948408652	842543612.25	1779577313.375
High	G1MBJ8	0.000	210.401	36	23	74	19	796	87.5	5.43	225.56	3	405906186.25	583470153.627719	800478474.924216	405906186.25	559934973.5	613421055
High	D2HC79	0.000	210.046	59	22	110	22	375	42.8	5.34	297.34	0	849420651.125	612397270.774487	4713042998.61851	849420651.125	587695270.1875	3611689631.9375
High	G1MBX9	0.000	210.024	28	29	73	29	1362	149.9	5.54	183.93	0	214847948.1875	309192238.57979	209116272.666569	214847948.1875	296720486.625	160249561.5
High	G1LN32	0.000	209.974	72	18	186	9	290	32.4	8.92	385.39	10	6700035926	7187116494.38051	10195555377.1653	6700035926	6897212923.0625	7813037491.5625
High	G1LUF7	0.000	209.936	69	16	91	16	344	37.1	7.62	255.78	0	1269934953.21094	1147047861.76619	756992711.770353	1269934953.21094	1100779894.375	580097132.4375
High	G1L4Y7	0.000	209.796	55	16	146	16	384	41.6	9.26	452.58	0	1614144392.47266	1939745469.05857	2749418997.50745	1614144392.47266	1861502805.34668	2106929236.60156
High	G1LF93	0.000	209.761	37	20	65	20	669	75.6	4.98	182.65	0	545444339	657256620.537739	364448325.562562	545444339	630745148	279283307.875
High	D2H3B7	0.000	209.561	20	32	70	30	2045	234.5	7.75	177.63	0	75338523.25	132668364.938179	267258439.854156	75338523.25	127316979.1875	204804950.125
High	D2H8C0	0.000	209.333	45	28	76	28	793	87.9	7.05	169.61	0	571173806.25	717701205.288543	435925953.876014	571173806.25	688751606	334057900.25
High	G1M9F5	0.000	209.095	39	24	41	2	817	91.1	5.44	110.89	21	82843430.9375	450401262.789157	578368722.207291	82843430.9375	432233624.25	443214356
High	D2HUM1	0.000	209.090	65	18	78	18	440	48.7	5.27	244.48	0	385739209.4375	327735382.247208	420054089.173762	385739209.4375	314515663.625	321895004.8125
High	G1LET6	0.000	209.079	42	30	68	29	926	104.4	6.52	176.11	1	197713874.5	272524919.092588	719922419.751458	197713874.5	261532200.75	551689500.8125
High	G1L4Z2	0.000	208.946	54	15	59	15	420	46.1	8.24	196.55	0	570024369.5	596943714.764188	349948584.055689	570024369.5	572865057.5	268171895.125
High	G1MA07	0.000	208.930	60	21	90	20	489	54.3	6.60	219.16	0	840869419.125	876623017.601502	709550366.076053	840869419.125	841263058.75	543741209.5
High	G1MA99	0.000	208.830	32	32	79	32	1302	144.2	6.96	192.23	0	262564000.375	279964511.681594	625289162.252326	262564000.375	268671705.75	479170333.25
High	G1KZI3	0.000	208.805	40	29	81	29	976	107.0	7.31	221.25	0	227091519.875	395540538.849631	489026154.485947	227091519.875	379585793.3125	374749539.1875
High	G1LTA8	0.000	208.760	53	26	67	26	685	75.5	6.84	175.04	0	457708167.8125	468551846.955869	470655849.64145	457708167.8125	449652076.25	360672044.125
High	G1MJ57	0.000	208.758	30	18	104	18	933	103.8	5.14	312.57	0	1930879003.0625	547792120.162656	778916726.092796	1930879003.0625	525696069.25	596897899
High	G1LWG5	0.000	208.704	63	18	356	18	338	35.4	8.68	1008.86	0	20317638820.4375	24961435677.4596	14464222859.2335	20317638820.4375	23954577175.3359	11084194171.375
High	G1LMQ3	0.000	208.651	51	18	180	18	477	53.5	5.60	405.04	0	865519622.3125	1247512005.89966	1759031204.61839	865519622.3125	1197191660.3125	1347977255
High	G1MC00	0.000	208.484	53	20	75	20	576	64.9	6.39	240.74	0	551107372.75	624416942.5759	299128232.461415	551107372.75	599230109.75	229227345.5
High	G1LBU7	0.000	208.470	70	20	127	20	309	34.4	8.59	349.44	0	3459800430.53125	1853273308.79314	241384301.512832	3459800430.53125	1778518634.75	184977132.46875
High	G1MBA3	0.000	208.398	44	20	119	19	519	58.5	5.12	293.83	0	948038512.75	903849618.715071	1563189254.94614	948038512.75	867391432.375	1197900046
High	D2HUZ7	0.000	208.265	52	28	78	28	654	74.5	6.33	221.52	0	908622935.25	608793600.152909	357439475.185384	908622935.25	584236959.25	273912299.75
High	D2HN55	0.000	208.227	11	40	74	40	5005	555.4	6.58	159.50	0	186244992	191150957.090033	170301303.477751	186244992	183440584.625	130504952.375
High	G1LU49	0.000	207.987	71	16	85	15	253	28.7	5.78	256.02	0	289525184	339446248.715607	1084965861.43311	289525184	325754154	831428856.875
High	D2H6F1	0.000	207.984	61	15	369	13	414	45.6	5.49	1113.80	0	3818666518.52344	4635989875.71308	3710992785.92946	3818666518.52344	4448989981.85938	2843800528.25
High	D2HSI5	0.000	207.885	65	17	157	17	309	32.3	7.99	445.01	0	4372077446.4375	3365241840.96292	3659478924.17328	4372077446.4375	3229499554.21875	2804324529.3125
High	D2HY33	0.000	207.879	47	34	61	34	1151	126.0	6.93	167.84	0	73133822.875	50319760.3936331	343326427.915528	73133822.875	48290034.25	263097217.75
High	G1M733	0.000	207.348	42	27	172	27	709	81.0	6.87	357.43	0	1352312568.81641	1847185406.48539	2180090690.6362	1352312568.81641	1772676297.49219	1670642713.5
High	G1LP37	0.000	207.152	35	25	77	25	912	101.4	7.27	208.59	0	743792323.5	586526768.91791	3885848267.69991	743792323.5	562868295.4375	2977795429.375
High	G1M5C5	0.000	207.149	66	15	65	14	256	28.8	8.07	175.13	1	1055593965.25	528927361.723502	67730328.997915	1055593965.25	507592250.3125	51902969.5
High	D2H4W9	0.000	207.121	71	10	74	1	117	13.0	7.84	242.54	0	372197976.75	363744611.642502	616596586.393274	372197976.75	349072404.5	472509056
High	D2HUS1	0.000	207.006	64	19	93	19	338	38.4	5.67	249.03	0	1048096241.8125	1187360280.39661	424379019.781343	1048096241.8125	1139466248.625	325209276.9375
High	D2H526	0.000	206.969	22	25	84	18	1491	164.4	9.41	192.38	0	201626948.125	222243691.218318	114731982.228479	201626948.125	213279144.75	87921181.875
High	G1M3K5	0.000	206.835	44	18	86	1	539	60.7	8.81	262.49	17	820788689.75	946250487.926247	1529930446.75981	820788689.75	908081996.289063	1172413223
High	G1M3Y7	0.000	206.696	31	31	71	31	1274	144.5	6.04	177.80	0	470577255.5	485129564.65919	244778706.080113	470577255.5	465561105.8125	187578325.75
High	G1LJY0	0.000	206.623	57	17	75	17	303	34.5	5.95	224.20	0	1072176971.375	740660370.587039	902945199.518672	1072176971.375	710784677.5	691943149.3125
High	G1L331	0.000	206.443	57	25	125	25	510	57.0	7.88	266.51	0	1710212781.75	1338293575.44892	758849489.515693	1710212781.75	1284311413.4375	581520014.625
High	D2HQ02	0.000	206.434	35	31	54	31	1142	126.8	5.83	145.51	0	227435033.125	231090267.244722	87545237.0667218	227435033.125	221768880.3125	67087490
High	G1M8F7	0.000	206.199	42	23	111	23	559	64.2	6.15	266.28	0	1173183228.75	927006858.403512	1775239903.5445	1173183228.75	889614588.625	1360398272.5625
High	D2HDZ3	0.000	206.127	31	37	80	37	1455	163.6	6.15	189.54	0	379966296.25	412280514.870674	231280784.246923	379966296.25	395650536.25	177234625.4375
High	D2HIP7	0.000	206.086	53	22	87	1	554	59.8	8.40	266.66	0	25459268			25459268
High	D2GUL8	0.000	206.039	27	30	48	30	1542	169.7	6.68	136.86	0	57414490.75	137743928.928121	207415129.806798	57414490.75	132187812.375	158945945.125
High	D2I459	0.000	206.037	63	15	199	1	295	31.7	5.95	646.09	0	4511547.875	3967960.3805905	12669172.4474745	4511547.875	3807906.5	9708614.75
High	G1M4C9	0.000	205.859	74	17	81	17	374	41.8	6.74	242.33	0	817340656.625	806704035.612449	543122290.870757	817340656.625	774164368.125	416204381.625
High	G1MH60	0.000	205.852	47	29	84	29	777	85.6	6.70	242.95	0	392625876.25	615683360.916297	299229107.605451	392625876.25	590848810.75	229304647.9375
High	G1LES4	0.000	205.809	52	19	70	19	505	55.2	4.81	231.87	0	803227821.21875	572080798.541945	213358650.811043	803227821.21875	549005025.84375	163500572.1875
High	G1LGE6	0.000	205.766	26	42	75	42	1956	218.6	6.67	165.82	0	126844676.125	116288901.17994	239030779.792665	126844676.125	111598206.6875	183173586.4375
High	G1MF23	0.000	205.691	73	16	144	16	312	33.5	5.12	411.89	0	2516213959.6875	2131683217.28267	466801260.171957	2516213959.6875	2045698444.65625	357718202.875
High	D2HAM3	0.000	205.678	62	29	91	29	588	66.7	8.21	218.08	0	1268646261	897093051.131669	133202554.195921	1268646261	860907401.5	102075513.4375
High	G1MEI9	0.000	205.601	49	23	248	19	471	53.5	5.45	643.85	0	2835060687.46875	7810141830.10123	6103039164.05478	2835060687.46875	7495107558.59375	4676868697.90625
High	D2I726	0.000	205.548	62	10	117	10	151	15.0	4.63	410.22	0	3682683675.5	3845915377.48486	6300903872.70744	3682683675.5	3690784372.75	4828495983.5
High	G1LIX4	0.000	205.463	33	28	73	28	1053	116.7	5.11	176.39	0	672597118.3125	574091617.861704	623213709.864157	672597118.3125	550934735.625	477579876.75
High	G1MHB6	0.000	205.381	51	19	103	14	482	55.7	6.33	274.22	5	859519636.375	1104285917.57052	3392900319.18546	859519636.375	1059742820	2600040548.875
High	D2H8L3	0.000	205.356	69	20	68	20	460	52.3	7.52	184.04	0	700295670.5625	512274488.635327	409447535.750705	700295670.5625	491611096.875	313767012.125
High	D2I1I6	0.000	205.328	64	28	66	26	533	60.1	7.88	152.35	2	453187033.125	569650687.367729	187887602.356367	453187033.125	546672937	143981649.5625
High	D2GUY8	0.000	205.294	63	20	139	18	410	47.2	7.06	348.75	3	1555886775.53125	1563320460.70925	1176193012.18143	1555886775.53125	1500261487.75	901337863.5625
High	G1LMC8	0.000	205.190	36	28	61	28	1090	120.5	6.37	176.65	0	224733711.9375	242817411.22968	193978921.584263	224733711.9375	233022991.625	148649537.0625
High	D2HFG9	0.000	205.112	54	18	124	18	282	30.9	4.84	332.39	0	2262646311.75	2008273129.5759	341497546.145242	2262646311.75	1927266295.625	261695712.75
High	D2HL56	0.000	204.962	48	22	114	22	499	56.9	6.34	264.81	0	1309661216.5625	1224990153.48708	865249962.909887	1309661216.5625	1175578262	663056611.40625
High	G1LFZ3	0.000	204.934	49	18	85	18	465	50.9	6.06	215.00	0	846386850.0625	777428335.824686	727397788.19648	846386850.0625	746069549.421875	557418010.125
High	G1LRJ4	0.000	204.930	41	23	59	23	880	97.1	5.78	171.77	0	248434904.5	141458688.430756	603108308.484157	248434904.5	135752731.25	462172746
High	G1LDP4	0.000	204.914	57	18	57	18	432	47.6	6.33	169.63	0	456764133	381020783.784202	216481655.60136	456764133	365651715.25	165893786.9375
High	G1LSN3	0.000	204.763	14	35	39	35	3579	386.9	6.43	107.03	0	229855474.375	34890419.0575463	764228128.749167	229855474.375	33483059.5	585641762.625
High	G1LTF7	0.000	204.701	52	27	123	27	528	60.9	9.38	289.21	0	2330107954.21875	2233315326.91015	1769578273.18899	2330107954.21875	2143231064.375	1356059663.375
High	D2HWT0	0.000	204.632	45	33	137	33	820	95.6	9.58	283.50	0	1053923355.25	1412053186.58953	1530916702.15382	1053923355.25	1355095815.4375	1173169008.25
High	G1LE94	0.000	204.607	32	23	59	23	1059	114.4	6.20	173.49	0	179083824.8125	95801227.2205006	602437834.124956	179083824.8125	91936935.0625	461658949.4375
High	G1LX86	0.000	204.382	16	19	37	19	1836	183.3	5.07	114.20	0	10285415	24232467.5593038	581360653.798929	10285415	23255013.125	445507127
High	G1M1A3	0.000	204.318	78	14	183	3	208	22.3	8.73	636.08	10	3666623894.5625	1141414321.75425	1815193559.38198	3666623894.5625	1095373592	1391015477.75
High	D2HWL9	0.000	204.281	48	31	80	31	770	86.4	5.38	215.41	0	472242427.3125	473920777.53289	546355121.479112	472242427.3125	454804442.625	418681757.875
High	D2I2N0	0.000	204.258	39	14	392	7	449	49.2	6.30	1256.96	0	296858047.390625	146236362.877492	206249716.62459	296858047.390625	140337690.734375	158052868.039063
High	G1LYT4	0.000	204.203	31	42	93	12	1625	184.0	6.39	188.19	23	218135176.75	398716016.38413	1742326872.42639	218135176.75	382633183	1335176424.75
High	G1MGL2	0.000	204.144	47	26	69	24	894	97.5	6.34	203.78	1	355884638.5	151529058.410548	416440260.315649	355884638.5	145416897.125	319125662.75
High	G1L9V9	0.000	204.120	28	35	78	34	1547	171.2	7.20	163.50	0	211448804.375	2588988032.48678	409752248.028645	211448804.375	2484557155.75	314000518.625
High	G1M5K1	0.000	203.800	19	21	89	21	1284	142.3	5.40	227.38	0	902006194.5625	839040944.732649	387762784.048578	902006194.5625	805196917.5	297149596.8125
High	G1M752	0.000	203.770	33	27	58	27	1037	119.2	6.00	129.41	0	87314387.5	202309794.347858	317129312.97068	87314387.5	194149312.75	243021897.3125
High	G1LGF0	0.000	203.746	64	26	99	26	434	49.9	8.98	238.23	0	5966792843.6875	858056244.295707	2009787225.68628	5966792843.6875	823445205.25	1540136104.75
High	G1M307	0.000	203.739	59	16	89	16	299	33.2	5.77	259.95	0	2132209756	1526897564.28305	634977301.814864	2132209756	1465307765.75	486594528.875
High	D2HN66	0.000	203.607	48	28	65	28	730	82.4	5.85	179.72	0	512555257.1875	588863512.69089	405598572.209434	512555257.1875	565110783	310817482.125
High	G1MJF8	0.000	203.525	71	22	79	22	412	46.0	6.90	203.53	0	1082886178.375	892808456.501484	70396864.2578253	1082886178.375	856795632.6875	53946383.4375
High	G1MG90	0.000	203.521	62	21	78	3	512	55.5	7.40	233.58	18	1744028913.25	969545057.360453	337393924.204525	1744028913.25	930436942.875	258551033.4375
High	G1LYQ3	0.000	203.483	58	19	63	18	511	55.5	7.61	185.67	0	676325045	595057690.335042	172791469.639622	676325045	571055108.8125	132413211.5
High	G1L7S2	0.000	203.407	52	19	100	19	507	57.1	9.41	302.87	0	949699328.25	1026262931.54375	1252094314.13552	949699328.25	984867013	959502396.625
High	G1LEM2	0.000	203.365	60	20	149	20	399	45.3	7.78	447.76	0	4540310706.0625	2514187646.56969	1122975543.18382	4540310706.0625	2412773960.25	860556359.75
High	G1MD78	0.000	203.040	40	29	75	29	1078	120.1	6.76	183.73	0	244249066.75	196076187.059929	185083585.494123	244249066.75	188167147.75	141832881
High	G1LS38	0.000	203.018	57	11	127	11	247	28.3	6.77	336.75	0	1242970242.04688	806745084.248302	376159175.047883	1242970242.04688	774203761	288257542.5
High	G1LJU8	0.000	202.863	31	34	80	26	1353	158.1	5.94	182.57	0	248709528.03125	252592689.212802	414904106.079196	248709528.03125	242403968.5	317948480.125
High	G1LSN5	0.000	202.858	34	21	88	21	641	70.0	7.97	253.82	0	693727820.53125	786760726.067041	559272780.035196	693727820.53125	755025503.125	428580792
High	G1LI94	0.000	202.857	47	15	93	14	376	41.4	8.35	272.20	0	1052461488.625	969320858.31679	1384966890.35077	1052461488.625	930221787.25	1061325042
High	G1LP07	0.000	202.848	34	29	80	29	1134	128.7	7.49	187.65	0	324101469.875	435278331.740687	213910855.403226	324101469.875	417720700.25	163923736.5
High	D2HPS7	0.000	202.641	46	22	86	22	796	86.2	4.96	251.85	0	827382685.59375	1095442802.58824	131628907.119787	827382685.59375	1051256405.875	100869599.375
High	D2HCC2	0.000	202.620	28	22	51	22	1402	149.9	6.80	121.15	0	235047743	221483286.610582	108566844.346545	235047743	212549412.25	83196725.8125
High	D2H0F5	0.000	202.617	53	19	85	16	492	55.3	6.74	238.22	0	388046094.25	325395621.30317	511355940.267869	388046094.25	312270280.59375	391861255.71875
High	G1L597	0.000	202.615	35	29	49	29	1185	131.7	6.46	133.71	0	64328321.625	844708198.712662	280586586.04995	64328321.625	810635573.9375	215018548.3125
High	G1LRN0	0.000	202.571	48	26	60	26	859	93.9	5.44	181.63	0	378073723.125	443192539.941841	151199602.191862	378073723.125	425315676.5	115866975.0625
High	D2GVW3	0.000	202.514	39	25	60	25	767	86.4	7.01	153.63	0	302410773.375	224898384.285262	94509933.6128615	302410773.375	215826756.625	72424662.25
High	G1LMD0	0.000	202.481	46	24	50	24	719	79.9	6.98	155.70	0	878761201.5	646026187.606585	87106153.0247084	878761201.5	619967712.125	66751012
High	G1M010	0.000	202.443	44	33	73	33	963	109.5	7.39	176.00	0	158933880.875	166660018.519008	438090500.398076	158933880.875	159937526.320313	335716631.1875
High	G1ML10	0.000	202.436	78	20	107	3	183	21.1	6.14	272.59	18	4025668815.125	5442721113.84737	96439128.9130667	4025668815.125	5223180455.25	73903039.3125
High	D2I2B4	0.000	202.434	50	21	93	21	624	68.9	7.24	265.35	0	739987678.5	717831269.506976	1305838668.19376	739987678.5	688876423.875	1000687661.9375
High	D2H0L5	0.000	202.371	34	29	64	29	1050	122.0	7.93	177.01	0	163112909.125	198110923.130442	136223769.649255	163112909.125	190119809.5625	104390725.1875
High	D2H0N9	0.000	202.282	28	29	57	28	1401	160.6	6.86	140.25	0	290395741.6875	484887518.668539	117690682.837194	290395741.6875	465328823.125	90188487.375
High	G1MAF7	0.000	202.240	65	23	129	23	463	52.5	6.84	324.62	0	1500972147	1660875492.56704	1065032467.46638	1500972147	1593881485	816153538.5
High	D2I1W0	0.000	202.078	57	16	87	16	401	42.5	7.68	285.69	0	2662381138.8125	1883418000.52537	1234540575.58155	2662381138.8125	1807447393.25	946050651
High	G1LUR9	0.000	202.059	71	17	69	17	356	40.1	6.16	210.98	0	268210892.375	503156621.925399	690278428.345368	268210892.375	482861013.5625	528972776.9375
High	D2HL36	0.000	201.938	33	29	53	29	1343	145.9	7.69	128.35	0	174790345.804688	170710040.799201	75446534.5565007	174790345.804688	163824184.625	57816036.625
High	G1L5E3	0.000	201.700	42	23	126	23	557	59.7	9.22	286.87	0	2173657390.4375	2347149399.29841	1133754988.77035	2173657390.4375	2252473461.625	868816842.8125
High	G1L4H2	0.000	201.605	60	25	71	25	553	60.4	9.17	184.63	0	419388302.9375	306003814.44911	545871811.385715	419388302.9375	293660672.5625	418311388.65625
High	D2GW94	0.000	201.568	39	28	81	28	973	110.0	6.10	231.46	0	239876004.9375	269293858.334433	177055222.885868	239876004.9375	258431469.875	135680602.3125
High	D2GXX5	0.000	201.549	52	22	105	22	561	64.9	6.14	321.43	0	814236600.125	760494463.066475	693619173.277419	814236600.125	729818730.875	531532849.875
High	G1LI67	0.000	201.379	60	23	68	23	607	67.3	7.84	222.86	0	334915300.140625	295049425.495519	90226327.560442	334915300.140625	283148146	69142057.875
High	G1MJB0	0.000	201.328	52	22	114	21	456	53.0	7.36	323.09	0	978496265.234375	1360145120.72606	1013877849.60962	978496265.234375	1305281542.5	776952834.625
High	D2I3Z5	0.000	201.280	77	16	212	16	199	22.2	6.71	541.14	0	7475859856.98438	7365170646.27996	9991836841.86433	7475859856.98438	7068084982.59375	7656924313.30469
High	D2HLQ6	0.000	201.227	83	15	159	10	320	34.0	6.98	396.30	3	4215916808	5881726004.38523	6313633073.10763	4215916808	5644477397.72656	4838250598.75
High	D2HY39	0.000	201.209	30	34	74	34	1358	152.9	7.17	164.46	0	163459359.125	240514654.893038	695120584.267088	163459359.125	230813120.5625	532683408.125
High	D2H5C8	0.000	201.195	56	24	100	22	533	59.7	5.50	249.63	2	873034133.085938	963581724.905112	3041317719.75591	873034133.085938	924714150.75	2330616478.375
High	G1LZC1	0.000	201.176	14	38	72	38	3663	400.9	7.59	156.53	0	248932333.4375	183333088.002527	443991695.63094	248932333.4375	175938061.5	340238823.25
High	G1LI36	0.000	201.170	31	39	93	20	1278	148.3	7.31	190.73	1	36330233.625	74207346.1699554	90774467.1788857	36330233.625	71214076.9375	69562107.125
High	G1LTT6	0.000	201.163	34	24	64	24	971	106.6	6.40	169.81	0	94468122.125	111069936.329784	405704935.365707	94468122.125	106589756.9375	310898990.125
High	G1L0T3	0.000	201.160	45	19	66	17	609	66.8	6.70	196.88	2	684739010.875	496351431.371005	188277260.033539	684739010.875	476330321	144280251.25
High	D2H2Y2	0.000	201.081	40	22	247	22	511	58.1	9.29	640.42	0	9758876968.64063	13357389968.6218	3339727811.31879	9758876968.64063	12818598777.6875	2559293499.58594
High	G1MDA5	0.000	201.010	30	25	80	25	985	111.1	5.45	175.22	0	330495823.375	366499136.714318	1467763560.98936	330495823.375	351715821.5	1124773620.125
High	D2HB93	0.000	200.679	49	18	91	1	455	51.0	9.00	268.66	0	54658324	158466656.127174	429936476.672106	54658324	152074656	329468056.125
High	G1LXM4	0.000	200.313	58	26	81	26	445	49.7	9.36	231.95	0	734134339.0625	728344337.18695	643642756.599518	734134339.0625	698965430.546875	493235022.757813
High	G1LF46	0.000	200.267	58	16	97	7	376	42.2	6.40	283.86	0	201490528.5	161590050.362955	370289108.292816	201490528.5	155072063.25	283759204.75
High	D2GX72	0.000	200.160	14	42	79	42	3527	395.1	6.76	175.40	0	374935493.375	371634692.113988	2343872245.85295	374935493.375	356644226.25	1796151465.5
High	G1MAM1	0.000	200.065	28	23	107	23	1072	113.1	8.72	298.76	0	1071672664	1122988542.67066	861276722.14116	1071672664	1077691045.5	660011845.53125
High	D2I072	0.000	200.004	44	22	78	22	649	70.7	6.16	225.75	0	533654508.625	452135304.312889	334847641.733071	533654508.625	433897720.5	256599771.375
High	G1LP71	0.000	199.829	38	33	93	33	972	112.3	6.68	213.17	0	433363417.25	369408342.903126	187361328.089832	433363417.25	354507680.3125	143578356.125
High	D2HWG7	0.000	199.818	38	14	131	14	555	60.4	5.41	454.37	0	896473231.625	1254189891.14556	2300710635.42175	896473231.625	1203600182.625	1763075947
High	G1LWC4	0.000	199.792	47	21	158	21	345	39.5	5.38	348.77	0	5782394649.625	6717832369.39318	2690500276.57815	5782394649.625	6446858106.35938	2061778760.875
High	G1LVB9	0.000	199.744	45	23	77	1	752	84.1	7.44	206.33	0	37218546.75	36588621.1935885	4775442.50999622	37218546.75	35112762	3659507.5
High	G1LWU1	0.000	199.564	29	27	62	27	1258	141.4	6.46	142.40	0	210848953.75	216764357.742923	102082856.452522	210848953.75	208020828.75	78227929.25
High	G1L586	0.000	199.562	55	23	72	22	624	70.8	6.77	193.12	1	311763107.75	384045592.267053	690578506.042687	311763107.75	368554513.357422	529202731.875
High	G1LMV1	0.000	199.448	61	24	84	24	427	47.7	7.43	211.04	0	1125023151.875	1128730362.1803	1238356882.23252	1125023151.875	1083201259.75	948975155.4375
High	G1LPD4	0.000	199.433	33	33	75	29	1376	151.2	7.58	176.01	0	283846909	276689209.762083	116897676.038628	283846909	265528518.25	89580792
High	D2H6V7	0.000	199.414	47	30	86	29	820	90.3	7.90	201.38	0	698506190.5	551991808.13777	309206906.463664	698506190.5	529726356.25	236950814.691406
High	G1M9R1	0.000	199.387	80	19	177	19	207	23.5	6.70	478.21	0	2245022955.375	2458440190.66096	2548790993.24683	2245022955.375	2359275165.0625	1953184387.875
High	G1LD19	0.000	199.372	52	20	77	20	499	53.9	8.69	236.18	0	546670494.425781	400272473.849725	978039773.624114	546670494.425781	384126858.322266	749489472.3125
High	G1M165	0.000	199.276	64	18	102	18	382	42.8	6.92	292.70	0	1084900577.0625	881726840.782564	1165301472.87042	1084900577.0625	846161011.25	892991481.0625
High	G1KZM6	0.000	199.275	45	28	81	22	712	79.9	9.22	172.08	6	393706103.3125	631316010.117735	1208446228.0272	393706103.3125	605850892.625	926054083.0625
High	D2GXY5	0.000	199.246	28	25	67	23	1242	143.5	5.12	205.45	2	376288628.75	254151057.233871	357022024.868198	376288628.75	243899477.3125	273592400.0625
High	G1LPV3	0.000	199.144	44	29	105	29	928	106.9	5.40	253.23	0	578612696.5	734517227.82717	451233188.008697	578612696.5	704889328	345788109.125
High	D2HMS8	0.000	199.044	33	31	49	1	1175	130.6	9.85	123.38	0		5905763.18384229			5667545
High	D2GUW1	0.000	199.031	46	16	227	14	210	24.1	7.39	590.65	0	7518263157.25	8362324880.09033	5970831053.75958	7518263157.25	8025017442.65625	4575555244.71875
High	G1MBY6	0.000	198.907	67	17	140	1	323	36.6	6.79	397.32	0	422854468	462128176.419918	95874398.5154876	422854468	443487514.5	73470276.25
High	G1LWN4	0.000	198.906	37	23	62	11	870	99.8	5.77	163.30	7	228057015.5	233099712.026599	298493253.239868	228057015.5	223697271	228740749.5
High	D2GUL3	0.000	198.862	83	19	167	16	289	32.5	6.38	478.62	0	1990707464.42969	2069729159.61496	484656089.71017	1990707464.42969	1986243400.6875	371400679.9375
High	G1L3W1	0.000	198.849	50	20	129	20	450	52.4	5.47	324.69	0	1948411423.4375	1639292368.34758	1167654505.35993	1948411423.4375	1573168949.8125	894794652.1875
High	G1LAX7	0.000	198.824	38	16	76	8	583	61.7	5.24	255.42	7	692035374.5	584184572.97306	748493803.47446	692035374.5	560620575.625	573584266.125
High	D2HV07	0.000	198.767	38	20	80	20	638	69.7	8.90	222.94	0	680023328.625	693342481.681833	525004021.819908	680023328.625	665375429.5625	402320026.125
High	G1LJ66	0.000	198.740	50	22	86	1	541	58.5	8.28	252.20	18	868170785	485052974.070654	623844762.884318	868170785	465487604.625	478063464.03125
High	G1MFF0	0.000	198.564	54	21	118	21	536	60.6	5.67	357.82	0	1601500120.875	1813913538.66579	391103284.711927	1601500120.875	1740746502.4375	299709482.5625
High	G1LXK3	0.000	198.531	73	16	89	16	324	35.9	5.74	268.55	0	837345594.15625	846788805.552307	863196593.024016	837345594.15625	812632256.25	661483077.125
High	D2HJV9	0.000	198.525	72	19	119	4	318	34.8	6.98	341.56	14	3357316480.60156	3502811432.66415	971784765.82068	3357316480.60156	3361520061.53125	744696147.3125
High	D2GYB4	0.000	198.443	58	19	73	19	424	48.1	5.38	217.92	0	514358263	762407729.663519	262651858.054579	514358263	731654822.875	201274843.625
High	G1LR62	0.000	198.370	54	17	67	15	349	39.5	6.96	205.80	0	276101865.261719	242226692.21804	935782747.693224	276101865.261719	232456100.1875	717107153.1875
High	G1L5Q6	0.000	198.363	70	17	148	17	244	28.0	6.65	392.39	0	1968137353.75	2835567482.13978	2254654506.05449	1968137353.75	2721190438.10156	1727782306.57031
High	G1L3B0	0.000	198.076	66	14	113	11	286	33.0	7.01	323.60	3	1964764439.625	2085980345.13247	2362410221.54607	1964764439.625	2001839069.25	1810357449.75
High	D2H1T8	0.000	197.986	46	36	83	2	891	98.0	6.20	184.00	29	339792171.125	358518502.490783	782539578.701625	339792171.125	344057098.625	599674156.125
High	G1LEX1	0.000	197.972	36	18	297	16	328	36.4	9.07	650.33	0	4652577286.875	5172772396.76222	7898381080.90307	4652577286.875	4964120541.375	6052671504.875
High	D2I2Y6	0.000	197.970	72	18	75	3	183	21.1	5.74	205.96	0	1120849.625	271885650.182449		1120849.625	260918717.75
High	G1LGY6	0.000	197.962	43	23	60	19	783	87.2	7.25	172.62	0	93995375.5	56315113.970952	234722297.562499	93995375.5	54043555.875	179871919
High	G1LXN4	0.000	197.945	48	28	98	27	619	69.0	7.30	197.28	1	653299854.25	972872299.234156	1903503771.47676	653299854.25	933629975.25	1458689181.875
High	G1LEL6	0.000	197.864	36	12	120	1	470	53.6	5.31	336.95	0	165370442.75	255643858.387934	107337017.660696	165370442.75	245332064	82254287.5
High	D2HMZ8	0.000	197.838	38	22	58	22	902	101.0	5.71	165.06	0	88420077.375	106754575.119008	384796488.844557	88420077.375	102448462.5625	294876471.4375
High	G1MI34	0.000	197.835	35	25	63	25	1003	112.2	7.58	165.13	0	258945707.125	257127329.643464	241175733.518108	258945707.125	246755697.125	184817303.0625
High	G1LD04	0.000	197.781	30	24	78	24	934	104.6	5.69	219.96	0	118174594.9375	265158771.653436	399340881.283549	118174594.9375	254463178.375	306022101
High	D2HZ43	0.000	197.762	54	17	189	17	455	50.5	6.07	497.08	0	3216238553.69531	4641829696.26341	5163008277.10509	3216238553.69531	4454594244.125	3956506119.1875
High	G1MB88	0.000	197.695	78	15	70	15	135	15.8	5.25	198.72	0	365784884.75	675299463.025519	1457217455.13921	365784884.75	648060204.25	1116691949.5
High	D2H305	0.000	197.481	22	41	65	41	2329	269.7	5.52	150.14	0	562690524.125	460324184.591367	144265712.618603	562690524.125	441756289.5	110553410.75
High	G1LZE1	0.000	197.433	53	24	70	24	636	70.0	8.62	211.10	0	720035263.625	707868464.711947	952120409.23857	720035263.625	679315484.375	729626997.125
High	D2HB23	0.000	197.307	16	43	67	8	3221	364.0	5.96	151.73	24	215284190.59375	663783648.793792	205975360.0851	215284190.59375	637008898.375	157842623.6875
High	G1LRP4	0.000	197.261	46	21	77	21	588	65.8	7.84	205.61	0	589570527.25	715832763.521021	501875518.857028	589570527.25	686958530.75	384596238.25
High	G1LEZ2	0.000	197.254	55	21	108	21	465	54.3	6.99	287.92	0	950489626	1629674305.573	737585833.443521	950489626	1563938846.625	565225292.46875
High	G1LGZ3	0.000	197.226	60	14	100	14	337	35.5	8.31	343.14	0	1611424714.5	1653385823.37242	957988417.57106	1611424714.5	1586693923.3125	734123757.46875
High	G1M339	0.000	197.141	19	37	70	37	2693	306.8	6.38	149.97	0	128823364.5625	171891408.680702	86615374.5482985	128823364.5625	164957900.1875	66374919.625
High	G1MDD2	0.000	197.111	22	21	70	21	1301	150.1	5.69	204.73	0	394138854.03125	255050511.762382	225718349.412857	394138854.03125	244762650.9375	172972031.5625
High	G1M0B8	0.000	197.087	24	29	49	18	1915	212.1	7.18	135.62	11	117061583.5625	89824190.9373572	329730088.142787	117061583.5625	86200991.875	252678098
High	D2H311	0.000	196.960	58	21	118	21	504	56.2	5.22	320.68	0	1870919180.875	1899595158.69022	2459779069.2709	1870919180.875	1822972020.46875	1884972949.3125
High	G1MBY5	0.000	196.958	66	17	135	1	325	36.8	6.54	382.17	15	3776394238.10938	2772151771.5021	1126118588.69186	3776394238.10938	2660332699.21875	862964932.0625
High	G1MFV7	0.000	196.903	52	21	140	21	436	49.7	9.54	342.35	0	1406437234.875	1800939590.90272	1396183064.39714	1406437234.875	1728295879.125	1069920197.9375
High	D2H5L2	0.000	196.903	33	36	106	36	1298	143.3	8.73	210.09	0	320850313.8125	451853944.865028	588370948.256784	320850313.8125	433627710.125	450879241.75
High	G1LY98	0.000	196.875	33	26	100	22	858	96.6	5.53	226.85	0	512701546.0625	346837583.500705	706969967.953027	512701546.0625	332847347.75	541763804
High	G1LQN3	0.000	196.791	50	15	303	15	371	41.7	7.28	947.48	0	6829924163.625	9512661127.36686	6175875595.25285	6829924163.625	9128953080.375	4732684565.375
High	G1LM39	0.000	196.726	64	15	133	1	249	27.9	8.62	376.30	0	44179249	28822345.3241298	55446530.8393223	44179249	27659751	42489674
High	G1LZG7	0.000	196.625	27	18	46	18	1026	112.8	4.91	138.76	0	162531128.75	120757421.294355	45953888.204542	162531128.75	115886482.0625	35215291.1875
High	D2HBJ9	0.000	196.620	53	18	114	17	478	52.9	5.92	343.35	1	767798942.65625	975120742.128245	671157290.529582	767798942.65625	935787723.6875	514319905.0625
High	G1LK01	0.000	196.384	44	35	81	1	928	102.2	6.28	180.75	0	7127746.75	623761.390092391	27921236.7608181	7127746.75	598601	21396546
High	G1LDQ6	0.000	196.374	63	11	238	11	241	26.4	4.79	777.69	0	4431711140.34375	3572922624.1452	3202015341.07838	4431711140.34375	3428803208.57813	2453761956.35547
High	G1LJR8	0.000	196.346	44	31	78	31	956	107.1	5.68	175.60	0	549774545.5	466333601.302143	101266039.857936	549774545.5	447523307	77601988
High	G1MI03	0.000	196.328	61	19	90	19	377	42.6	5.59	257.27	0	853357075.5	650072642.042519	391286125.82951	853357075.5	623850946.5	299849597
High	G1MJ37	0.000	196.226	40	28	81	28	992	108.1	5.74	191.85	0	593082682.25	542443374.396514	526028561.989852	593082682.25	520563073.5	403105149.6875
High	G1LIT9	0.000	196.124	37	23	49	23	1027	112.3	6.84	139.26	0	309557595	254871623.916672	79471107.7199691	309557595	244590978.8125	60900139.4375
High	D2I136	0.000	196.075	41	22	110	22	607	68.7	6.04	283.32	0	1235657536.5625	1199322534.93294	774795226.86393	1235657536.5625	1150945986.9375	593739520
High	G1LRL4	0.000	195.956	49	25	60	25	619	70.6	5.59	172.52	0	281257562.125	416634529.085761	32046185.9282717	281257562.125	399828924.5	24557568.75
High	G1LRJ9	0.000	195.932	48	22	94	18	559	61.4	6.11	267.86	3	1430795917.0625	1111612733.77279	195878120.361699	1430795917.0625	1066774097.625	150104927.25
High	D2HUK7	0.000	195.915	78	18	92	18	303	33.8	6.74	237.70	0	553021782.75	471550750.085924	1085664495.52863	553021782.75	452530013.9375	831964232.75
High	D2HYB8	0.000	195.904	75	16	173	9	216	24.1	7.39	473.82	7	1965425178.375	2739095965.71818	1503458212.34358	1965425178.375	2628610251	1152127073.5625
High	G1LFM1	0.000	195.904	70	17	100	13	277	30.6	7.34	271.12	4	1243216229.875	841027576.503592	1061843282.74066	1243216229.875	807103415.375	813709608.875
High	G1LC26	0.000	195.883	51	24	65	23	750	83.9	6.90	165.72	1	425902083.1875	313450706.797827	121051839.661212	425902083.1875	300807182.875	92764202.3125
High	D2GUN4	0.000	195.733	63	29	155	22	509	57.3	5.74	391.88	7	4132346452.125	3729931368.35193	1482169333.68781	4132346452.125	3579478759.8125	1135813022.88672
High	G1MHN5	0.000	195.694	48	25	92	25	633	71.1	8.85	232.13	0	503007982.25	590339554.3886	320305134.526478	503007982.25	566527286.25	245455586.5
High	G1LWF6	0.000	195.594	40	21	59	21	781	86.9	7.81	157.76	0	693328951	691997170.386633	94802003.130039	693328951	664084383.5	72648480.375
High	G1M2D6	0.000	195.591	58	21	94	21	445	52.2	6.04	254.91	0	2341850231.4375	1699115962.40623	1359218818.02598	2341850231.4375	1630579465.75	1041593831
High	G1LTU9	0.000	195.564	75	20	57	20	267	30.5	6.30	172.05	0	849570722.875	882294285.944623	93374883.1016031	849570722.875	846705567.625	71554852.625
High	G1MFB3	0.000	195.560	53	16	75	16	424	46.1	7.88	219.20	0	948602094.5625	1378957273.54796	932334294.536645	948602094.5625	1323334877.75	714464541.5
High	G1LYR4	0.000	195.495	55	13	76	13	267	29.7	5.66	274.16	0	625279708.28125	707458210.466051	481644101.700733	625279708.28125	678921778.375	369092539.34375
High	G1LQ51	0.000	195.371	29	30	90	30	1217	136.0	5.14	216.94	0	372543429	331180613.077285	413992050.055856	372543429	317821925.6875	317249555.1875
High	G1MHU6	0.000	195.326	42	24	41	24	757	84.3	5.66	117.48	0	117162451.25	137721077.362004	77379212.8266204	117162451.25	132165882.5625	59297082.75
High	G1MIC5	0.000	195.282	36	21	82	1	718	76.8	8.53	218.91	0	6661047.5			6661047.5
High	D2HTA3	0.000	195.237	35	28	52	27	1187	134.3	7.09	134.60	1	151146147.875	182519121.387556	244867255.074773	151146147.875	175156927.5	187646182.4375
High	G1L714	0.000	195.186	81	19	152	19	262	29.6	7.53	376.54	0	7560952106.40625	6129823888.31627	203053674.055076	7560952106.40625	5882567865.9375	155603683.125
High	G1L0F0	0.000	195.151	36	16	55	16	716	76.5	7.85	159.15	0	727228889.375	553880201.691767	222662798.588458	727228889.375	531538578.5	170630508
High	D2H2Q0	0.000	195.106	63	17	86	17	376	41.7	6.73	217.98	0	814345838.9375	933303179.735374	740530076.852142	814345838.9375	895656938	567481519.15625
High	G1M8R9	0.000	194.881	35	32	113	32	956	109.6	5.05	236.43	0	236156369.5	291702649.287196	3887395876.8743	236156369.5	279936367.238281	2978981390.125
High	G1LW28	0.000	194.855	47	18	70	11	514	55.7	5.55	247.30	7	644599303.5625	672603701.393861	803021835.876754	644599303.5625	645473180.375	615370078.25
High	G1LIS7	0.000	194.842	40	24	55	24	779	88.2	6.93	164.18	0	138814197.875	997177172.907167	224521365.163657	138814197.875	956954473.875	172054761
High	G1LAS5	0.000	194.601	60	24	168	23	472	51.1	7.94	448.84	1	4290393480.4375	3885984964.75814	2160879140.36956	4290393480.4375	3729237690.625	1655920556.9375
High	G1LB95	0.000	194.566	40	28	73	28	986	111.8	8.31	198.85	0	249460602	174297132.235959	1022373646.02829	249460602	167266585.125	783463316.25
High	D2GVP2	0.000	194.558	60	22	79	22	476	53.9	7.21	199.46	0	263363923.375	358601541.498896	1422808670.52292	263363923.375	344136788.125	1090323878.875
High	G1LD44	0.000	194.550	47	20	65	20	540	61.4	8.75	173.52	0	976924901.125	953496280.304438	755622053.69783	976924901.125	915035518.3125	579046772.5
High	G1LZN4	0.000	194.298	37	26	48	26	1181	128.4	6.05	132.16	0	198220800.8125	311224158.623982	111253610.11158	198220800.8125	298670446	85255642.75
High	D2HK12	0.000	194.257	62	27	68	27	488	56.5	7.64	180.92	0	488356897.25	462252541.895663	239137936.63871	488356897.25	443606863.5	183255702.65625
High	G1M280	0.000	194.217	33	28	82	28	1083	123.7	6.96	216.81	0	390445959.1875	693277525.25019	526677931.115261	390445959.1875	665313093.25	403602772.929688
High	G1LPZ2	0.000	194.112	52	15	98	15	421	46.3	5.99	254.06	0	1595155054.3125	1191468885.33255	426565847.279121	1595155054.3125	1143409126.5625	326885082.1875
High	G1LH30	0.000	194.089	49	23	93	23	422	47.3	9.25	255.62	0	862983346.75	808494882.337725	836378123.015807	862983346.75	775882978.25	640931601.125
High	D2GZ65	0.000	193.987	61	16	60	1	400	44.6	5.60	194.85	0	49825969	23981978.5695969	63118305.5930768	49825969	23014628	48368693
High	D2I0T3	0.000	193.931	77	22	75	22	477	50.3	9.25	207.95	0	423287741.25	437965472.120692	283640842.698806	423287741.25	420299450.625	217359080.125
High	G1L4R7	0.000	193.903	64	14	71	14	276	30.8	6.30	205.27	0	746063305.25	1034722263.63744	499238428.211271	746063305.25	992985124.71875	382575388.25
High	G1MA83	0.000	193.878	36	21	69	21	843	92.3	6.48	177.52	0	648567017.125	208395243.183152	112895684.802966	648567017.125	199989295.5	86513994.125
High	G1LAH8	0.000	193.844	39	22	68	22	842	94.1	7.77	198.13	0	352871379.375	319755490.99248	423747941.110929	352871379.375	306857653.75	324725670
High	G1L008	0.000	193.746	48	14	153	14	382	40.5	6.44	408.99	0	2688113531.25	2555040108.17723	1588544108.97984	2688113531.25	2451978574	1217329926.75
High	G1L9C8	0.000	193.629	73	11	203	9	180	20.4	4.82	606.80	2	320139320.640625	175278708.263418	20426396628.8844	320139320.640625	168208567.75	15653115183.5469
High	G1LNS5	0.000	193.563	35	23	66	23	907	101.1	6.20	178.94	0	121387903.25	66022369.1479242	1229789412.97268	121387903.25	63359253.75	942409749.625
High	D2H0P1	0.000	193.488	42	15	450	3	453	49.8	5.38	1154.64	0	83570384.375	569180949.89808	690259131.607309	83570384.375	546222147.125	528957989.5
High	G1L3N5	0.000	193.468	42	16	77	16	535	59.8	5.11	244.94	0	544137810.625	609066757.506485	526089934.276795	544137810.625	584499098.375	403152180.375
High	G1LKG0	0.000	193.353	47	14	84	14	447	52.9	5.54	243.49	0	1062446879.25	1116177265.93306	318736774.012266	1062446879.25	1071154512.25	244253723.625
High	G1LZ13	0.000	193.273	54	20	134	18	269	30.3	10.61	344.35	2	2383580759.125	4519267070.15014	6273864447.9977	2383580759.125	4336975373	4807775185.9375
High	G1M120	0.000	193.270	38	33	64	33	1315	148.2	7.24	160.95	0	296659264.5625	207152875.465466	42274988.8558131	296659264.5625	198797040.625	32396084.4375
High	D2H5V5	0.000	193.247	27	19	45	19	1042	114.6	9.44	127.90	0	103443364.5	141486168.768091	688660438.874177	103443364.5	135779103.125	527732882.5
High	G1L685	0.000	192.944	30	39	85	39	1288	147.2	6.87	179.15	0	2348444793.875	830974325.155554	662864176.697997	2348444793.875	797455677.625	507964742.75
High	G1MAQ1	0.000	192.722	50	22	81	22	504	55.7	8.75	238.27	0	936606054.0625	722255327.809762	815326542.212806	936606054.0625	693122030.875	624799396.0625
High	G1LHD5	0.000	192.613	33	28	72	28	987	110.9	8.92	164.43	0	321728539.75	227954038.366071	470129273.199443	321728539.75	218759156.125	360268519.125
High	D2H8C3	0.000	192.571	24	32	72	32	1945	212.0	5.60	189.62	0	144628954.25	298260160.638223	165928292.552291	144628954.25	286229371.125	127153835.4375
High	G1L751	0.000	192.466	41	25	76	25	725	81.9	5.54	187.96	0	368194845.9375	370587757.959695	258660021.138159	368194845.9375	355639521.820313	198215827.1875
High	G1MEP5	0.000	192.424	46	25	58	25	778	88.6	7.37	145.19	0	190698637	251293457.549019	165760528.808159	190698637	241157143.375	127025275.0625
High	G1M2C8	0.000	192.379	62	15	212	14	272	30.5	6.64	606.71	0	7377429840.375	8166079824.80257	5193990817.52407	7377429840.375	7836688238.24219	3980248597.25
High	D2HKC3	0.000	192.366	44	25	86	24	702	80.8	7.06	221.35	0	70275844.3125	87058810.1065438	2239740411.82467	70275844.3125	83547157	1716353367.875
High	D2GX22	0.000	192.347	40	23	41	1	801	89.2	5.36	109.30	0			29292603.4980314			22447449
High	G1LPQ6	0.000	192.323	48	20	58	20	694	75.4	6.93	204.02	0	420781818.4375	201757241.581338	218597129.152999	420781818.4375	193619048.0625	167514912.375
High	G1MAW3	0.000	192.182	30	30	62	30	1101	126.2	5.41	138.47	0	342275801.75	290821776.285307	137815113.279166	342275801.75	279091025.625	105610200.4375
High	G1M0I2	0.000	192.128	77	18	96	18	263	29.4	7.20	223.72	0	1807602285.25	1267579170.24373	1049744492.31002	1807602285.25	1216449384.23438	804438088.125
High	D2I3G0	0.000	192.057	35	29	82	29	1015	114.1	5.36	200.48	0	414855927.625	325485815.977509	351719921.502804	414855927.625	312356837.125	269529302.875
High	D2HBI3	0.000	192.041	61	28	115	15	524	58.2	7.06	246.57	13	3385379493.875	3083940900.75525	2518128869.99289	3385379493.875	2959545326.875	1929687451.25
High	D2HZK4	0.000	191.911	50	20	77	20	571	61.4	6.15	184.79	0	680905521.5	705510198.48465	243902658.036361	680905521.5	677052342.5	186906994.375
High	G1LIL7	0.000	191.820	30	16	89	16	643	70.3	7.25	237.97	0	1054109156	872096665.623527	873988909.328247	1054109156	836919284.25	669753423.25
High	G1LX95	0.000	191.805	39	25	73	23	793	89.5	6.55	188.23	2	237060642.375	296438744.667164	218045854.494617	237060642.375	284481424.8125	167092460.6875
High	G1LM28	0.000	191.656	55	11	64	11	374	40.3	5.16	226.01	0	1206326414.5	761395530.921011	465478019.507129	1206326414.5	730683452.75	356704179.75
High	G1LG30	0.000	191.645	37	28	49	28	1116	124.3	5.19	123.22	0	157960954	41530390.0998178	203849273.445789	157960954	39855196.9375	156213365.25
High	G1LZC0	0.000	191.567	32	23	46	21	934	104.4	6.47	122.31	2	148246243.375	160899483.260075	274634877.191458	148246243.375	154409351.25	210457646.75
High	G1L8P2	0.000	191.388	53	18	108	17	333	37.7	6.09	270.43	0	1754465449.67969	1230645310.26283	110380306.440961	1754465449.67969	1181005309.19287	84586414.4375
High	G1M2P3	0.000	191.368	51	22	65	22	653	73.0	6.32	198.44	0	399368795.125	387885382.210412	171107478.68375	399368795.125	372239419.375	131122738.9375
High	G1L7A3	0.000	191.289	73	19	58	19	290	33.1	6.55	161.36	0	521689351.90625	471066406.185249	176842590.146789	521689351.90625	452065206.804688	135517658.019531
High	G1M2D8	0.000	191.195	34	25	62	25	946	104.8	7.99	148.41	0	126178924.875	258059456.563945	399274817.426751	126178924.875	247650225.25	305971475.078125
High	G1L0U2	0.000	191.070	19	33	70	33	2000	226.0	5.45	173.06	0	470970603	388559207.571482	218135761.117592	470970603	372886064.9375	167161357.75
High	D2HCY7	0.000	190.958	44	28	87	28	617	70.4	7.05	211.92	0	818987532.875	636904110.989735	349269016.947001	818987532.875	611213588.71875	267651130.625
High	G1M3K7	0.000	190.804	43	16	82	10	578	64.9	7.15	224.48	7	752504897.625	812699244.347322	1101391809.35368	752504897.625	779917750.75	844016356.25
High	G1MET1	0.000	190.603	28	29	67	2	1276	144.2	8.19	162.60	23	185735554	235030923.847272	252948553.932199	185735554	225550584.375	193839027.125
High	G1L0Z3	0.000	190.541	22	34	64	34	1991	226.3	8.18	120.66	0	126535620.375	170042629.600906	81141461.0604486	126535620.375	163183694.5	62180161.25
High	G1L1M8	0.000	190.506	44	18	68	17	618	70.5	7.94	181.23	1	267509517.21875	680104286.850463	376756298.656065	267509517.21875	652671218	288715129.0625
High	G1LLW2	0.000	190.427	62	15	118	10	419	46.8	4.91	331.09	0	676085977.25	731769775.547473	661103117.294873	676085977.25	702252698.5	506615211.25
High	D2I4F1	0.000	190.232	62	26	124	25	378	42.7	6.67	281.82	1	446262668.6875	377617190.728813	2928005175.61106	446262668.6875	362385411.4375	2243783037.4375
High	D2I2D2	0.000	190.215	78	13	296	1	181	20.7	6.80	860.98	0
High	G1MIR4	0.000	190.187	30	30	68	30	1419	154.8	5.62	148.84	0	188628119.75	284106882.947712	76155426.7956538	188628119.75	272646988	58359273.5
High	G1LAP1	0.000	190.175	72	13	80	13	226	25.5	5.48	254.51	0	3289183834.375	3282489103.55683	59311075.1351553	3289183834.375	3150084777.75	45451143.8125
High	G1L465	0.000	190.094	64	17	65	17	428	46.7	7.03	201.36	0	771264036.5	924393843.91332	750904481.909449	771264036.5	887106974.15625	575431612.375
High	G1L2A9	0.000	190.073	69	13	123	12	217	24.1	5.90	362.33	0	2076156362.875	2331543160.65822	1405936079.8917	2076156362.875	2237496725	1077394109.15625
High	G1LIU4	0.000	190.061	24	39	73	39	1922	218.1	5.69	166.21	0	580043231.0625	442071373.439514	548935447.504131	580043231.0625	424239734	420659108.125
High	G1MFS7	0.000	190.034	53	11	69	11	256	28.8	5.21	212.27	0	1192699126.5	2192788770.31543	3354834415.34337	1192699126.5	2104339209.75	2570869962
High	D2HWN5	0.000	189.898	41	24	63	24	707	79.3	8.43	169.65	0	417536750.9375	379857210.617835	130820816.341504	417536750.9375	364535076.625	100250344.875
High	G1LZY7	0.000	189.831	51	23	112	22	447	49.8	5.38	298.76	0	1776323113.0625	782429053.669048	3722653935.42006	1776323113.0625	750868555.5	2852736676.875
High	G1LIH9	0.000	189.821	42	19	84	11	444	49.4	7.47	216.79	0	195670547.875	387294966.364954	485018359.442251	195670547.875	371672818.875	371678293.75
High	G1MAS4	0.000	189.727	42	25	113	24	607	69.5	6.64	263.61	1	988190843.0625	1207593320.81437	574167900.897531	988190843.0625	1158883157.75	439995191.0625
High	D2HQ87	0.000	189.644	13	15	106	14	1670	162.8	8.44	298.40	1	1284390079.5	2064157606.30862	1124469537.29488	1284390079.5	1980896584.6875	861701234.3125
High	D2I3Z4	0.000	189.583	45	25	63	22	645	72.3	9.29	145.30	0	290980546.125	467537624.652367	112695695.737088	290980546.125	448678764.1875	86360738.90625
High	D2HB32	0.000	189.570	61	19	90	19	387	45.0	5.72	224.74	0	866949028.667969	679059511.037489	804800828.925181	866949028.667969	651668584.851563	616733352.625
High	G1MDP9	0.000	189.562	56	15	111	15	358	41.2	6.54	285.00	0	2054023394.4375	1886963510.71768	5141955131.51434	2054023394.4375	1810849889.75	3940372715
High	G1M2B9	0.000	189.392	49	17	73	17	539	57.7	4.89	220.49	0	688954792.125	890996714.560021	387950782.457334	688954792.125	855056970.1875	297293663.375
High	D2HWS6	0.000	189.245	78	13	295	1	181	20.6	7.43	857.39	15	5520544100.4043	5286601718.88078	3205357246.94433	5520544100.4043	5073358379.96484	2456322918.9375
High	G1KZU3	0.000	189.233	70	19	133	4	323	36.3	5.00	346.47	14	2430762135.3125	3011309009.8469	120942239.108667	2430762135.3125	2889843156.75	92680213.4375
High	G1MGV9	0.000	189.225	31	23	69	21	1061	118.5	9.23	185.70	0	558903089	670799014.269466	204761303.778098	558903089	643741288.125	156912270.5
High	G1LYF2	0.000	189.220	54	21	72	20	333	36.3	7.37	204.84	1	845599754.3125	574937781.89744	223097307.506239	845599754.3125	551746768.3125	170963480
High	G1LIC3	0.000	189.218	46	25	69	25	628	71.3	8.72	191.46	0	291557364.75	388590856.232151	474857039.841806	291557364.75	372916437	363891491.75
High	G1LHV9	0.000	189.089	44	24	72	24	744	85.7	6.68	169.09	0	331051913	335461607.747459	143395339.764608	331051913	321930239.75	109886428.375
High	G1M1L6	0.000	189.034	16	34	66	33	2579	291.9	6.47	145.68	0	296422375.375	217175760.047562	50123307.4066248	296422375.375	208415636.5	38410392.125
High	G1LED0	0.000	188.974	39	23	57	23	719	83.4	5.29	157.31	0	388135523.5	575800046.89044	566294258.655663	388135523.5	552574252.5	433961477.375
High	G1LW37	0.000	188.956	43	26	84	16	767	86.0	8.47	206.94	1	253137667.375	180717000.006423	156585000.287291	253137667.375	173427497.5	119993902.5
High	D2H8H8	0.000	188.930	22	39	61	38	2101	237.1	6.73	129.96	1	359626485.4375	950332046.490472	91773790.8260785	359626485.4375	911998918.8125	70327906.8125
High	G1L5Y9	0.000	188.912	51	23	80	22	674	76.2	5.35	209.13	1	263390118.5	264664098.228058	2375373569.35976	263390118.5	253988458.375	1820291496.375
High	D2HQ81	0.000	188.817	40	17	65	17	480	52.0	9.42	194.89	0	773529671.4375	1586820656.57069	210218922.463813	773529671.4375	1522813766.5	161094541.875
High	G1LIK2	0.000	188.548	68	22	75	18	378	43.0	6.74	192.94	4	501887786.5	958696825.741283	454144709.09644	501887786.5	920026291.625	348019260.109375
High	G1MEF4	0.000	188.510	33	30	81	30	1258	137.0	5.87	195.25	0	355918620.9375	682977685.238176	652676677.691232	355918620.9375	655428713.375	500157879
High	D2HV00	0.000	188.466	35	22	65	22	771	86.5	5.19	195.53	0	223860911.625	294121158.131268	252188696.639283	223860911.625	282257321.75	193256734.8125
High	G1L2G7	0.000	188.402	16	32	45	32	2947	294.7	6.47	116.01	0	101096463.5	88294609.2453388	228597075.877818	101096463.5	84733108.25	175178051.4375
High	D2GU38	0.000	188.401	36	12	103	1	469	53.4	5.31	292.87	11	809728650.25	1478257153.28966	688824861.805437	809728650.25	1418629341.71875	527858882.75
High	G1LBE3	0.000	188.234	41	23	66	23	792	89.6	7.71	169.70	0	214669340.25	315761177.753165	437408560.172057	214669340.25	303024457.375	335194048.125
High	G1L946	0.000	188.232	43	18	75	18	486	56.3	4.84	208.79	0	360234012.75	541836654.006793	429030479.98062	360234012.75	519980826.125	328773774.5625
High	G1M493	0.000	188.225	52	20	69	20	425	48.4	6.64	186.81	0	624237628.5	906693367.971247	295105119.282596	624237628.5	870120474.5625	226144361.5
High	G1L2V2	0.000	188.165	59	19	112	17	375	39.8	8.24	298.92	0	1816214351.125	920288510.208861	553006870.099589	1816214351.125	883167235.5	423779112.5
High	G1LX82	0.000	188.160	47	24	73	24	703	75.1	8.79	199.73	0	405023128	457239487.516003	249600915.362223	405023128	438796018.5	191273671.46875
High	G1MA98	0.000	188.048	48	28	89	28	625	68.7	8.79	236.30	0	948959663.875	957976533.633911	683434695.209786	948959663.875	919335053.625	523728301.125
High	G1LF38	0.000	187.721	60	19	168	19	403	45.7	7.46	433.53	0	3687664198.625	3222659303.87206	3226922064.18213	3687664198.625	3092668306.5	2472848426.3125
High	D2HBU4	0.000	187.710	44	23	78	23	683	77.5	9.50	201.67	0	464958904.5625	770812699.371713	767239679.807161	464958904.5625	739720765	587949568.375
High	G1MD85	0.000	187.579	42	27	72	27	877	98.7	6.71	176.22	0	368322492.875	251761287.579114	279848498.440434	368322492.875	241606102.75	214452938.5
High	G1LIY5	0.000	187.540	45	16	62	16	588	64.3	6.74	208.16	0	489039675.25	646658352.724153	302949390.965729	489039675.25	620574377.875	232155568
High	G1L0Y2	0.000	187.504	56	20	154	17	398	44.6	5.01	417.19	4	3612729032.04688	3308044909.88061	1709652279.69504	3612729032.04688	3174609750.70313	1310137296.5625
High	G1MJE3	0.000	187.482	33	27	78	27	908	102.8	5.83	195.14	0	323197680.75	311409995.260005	435748384.313528	323197680.75	298848786.625	333921825.5
High	G1L2H0	0.000	187.464	53	15	99	15	386	42.1	6.25	305.96	0	1596497705.875	2103333057.38928	2594975986.47577	1596497705.875	2018491832.75	1988576779
High	D2HFM6	0.000	187.387	52	24	54	24	735	81.7	7.40	163.35	0	150495808.25	232808043.365518	207221312.256948	150495808.25	223417367.25	158797419.25
High	G1LBE5	0.000	187.350	26	29	56	29	1583	168.5	8.73	146.25	0	147497525.375	139458505.685078	140622919.364738	147497525.375	133833229	107761872.75
High	G1M029	0.000	187.286	60	14	159	14	359	39.2	6.65	480.13	0	2949650255.54688	2800819060.48003	992628094.424753	2949650255.54688	2687843648.3125	760668764.96875
High	G1LH02	0.000	187.251	19	29	68	29	1812	201.9	5.01	152.98	0	207396826.375	213823311.029306	245982585.720753	207396826.375	205198413.75	188500880.375
High	G1L0N0	0.000	187.230	52	15	43	15	480	53.9	5.22	116.90	0	430671482.9375	375325309.168253	99102359.2459925	430671482.9375	360185976.5	75943920.625
High	G1LMF5	0.000	187.084	52	25	104	1	619	68.6	7.69	258.85	19	998412258.125	1105245714.93405	1765707772.40699	998412258.125	1060663902.4375	1353093629
High	G1MHD3	0.000	187.065	54	11	63	11	430	48.1	6.90	224.00	0	847057470.25	1043462104.6855	357319672.112327	847057470.25	1001372430.625	273820492.5
High	G1LMY2	0.000	187.044	32	29	63	26	1204	133.9	5.82	154.44	3	202714197.8125	265523803.404351	535411873.053115	202714197.8125	254813486	410295749.75
High	G1M193	0.000	186.821	24	33	58	33	1523	174.8	8.87	132.41	0	375044455.25	306051778.139489	79159137.5215829	375044455.25	293706701.5625	60661071.0625
High	D2H4I3	0.000	186.733	24	25	56	25	1420	158.9	5.64	150.93	0	176342916.625	112462635.462436	331305075.14897	176342916.625	107926279.375	253885038.875
High	G1M343	0.000	186.727	30	28	83	28	942	107.7	6.20	187.40	0	749166229.25	964485889.157701	793131229.694924	749166229.25	925581844.125	607790728.8125
High	D2HIT6	0.000	186.631	35	24	73	23	839	96.5	6.80	196.24	1	416455832.75	349734482.835845	268832551.652513	416455832.75	335627396.125	206011220.3125
High	G1LAI0	0.000	186.631	62	16	68	16	357	39.2	5.15	220.59	0	368153670.75	387991167.409158	248454823.864881	368153670.75	372340937.5625	190395400.9375
High	D2I7K2	0.000	186.425	53	18	70	18	500	57.7	5.85	198.34	0	478200517.125	712805751.643214	918265472.788039	478200517.125	684053618.125	703683350.3125
High	G1MFZ5	0.000	186.208	43	22	82	22	719	80.4	5.20	184.53	0	471215593	391698221.671384	317797993.769609	471215593	375898462	243534319.4375
High	G1LLC1	0.000	186.136	65	25	77	25	416	45.8	8.34	219.91	0	868338166.125	849912145.732679	225962956.664982	868338166.125	815629611.625	173159478.5
High	G1L108	0.000	186.032	47	19	97	19	483	55.1	6.42	226.83	0	2164310159.6875	1178688264.98271	898113720.382071	2164310159.6875	1131144032.5	688240699.9375
High	G1L1X3	0.000	185.928	49	18	180	17	440	50.2	6.51	449.61	0	6099972059.4375	8525687747.51777	7787551319.31748	6099972059.4375	8181790813.625	5967740664.875
High	D2HSS6	0.000	185.769	50	17	58	1	488	53.2	4.86	198.71	0	1538788.375	4012556.22358405	4493778.43170474	1538788.375	3850703.5	3443663.25
High	G1LBN8	0.000	185.742	62	16	236	8	246	28.0	4.83	545.64	2	1684602421.01563	2244250910.39386	3347350627.49857	1684602421.01563	2153725544.01563	2565135000.75
High	G1M2E6	0.000	185.731	43	18	113	18	621	67.1	6.01	349.64	0	801795139.5	1084624406.16844	1893155853.42491	801795139.5	1040874386.375	1450759386.125
High	G1LH46	0.000	185.669	53	26	81	26	494	56.2	7.18	197.95	0	1084302593.0625	1312435232.08671	339951175.033923	1084302593.0625	1259496106.75	260510700.75
High	D2H117	0.000	185.551	58	23	83	17	542	60.6	7.62	188.41	6	1106670908	761218467.477931	635958523.968679	1106670908	730513531.4375	487346457.0625
High	D2H1Q0	0.000	185.465	44	21	111	2	387	45.3	5.72	261.71	18	2691659558.5625	2394445630.54565	1853465139.26496	2691659558.5625	2297861925.5	1420343677.875
High	D2HCX3	0.000	185.400	37	19	78	14	504	57.6	8.16	191.28	4	1411098782.6875	1547530167.91016	473020317.331662	1411098782.6875	1485108121.07813	362483978.25
High	D2HQ34	0.000	185.305	33	21	58	21	808	91.8	5.63	201.17	0	201682394.125	344648218.479926	92518946.2424051	201682394.125	330746294.1875	70898932.8125
High	G1M3I9	0.000	185.268	54	18	119	6	343	39.9	8.82	350.93	0	1098301744.8125	951623852.959943	190931167.784189	1098301744.8125	913238618.25	146313988.5
High	G1LEK1	0.000	185.174	85	22	544	22	231	27.2	5.78	1277.57	0	29562988071.7891	26896631714.5137	3385001599.09124	29562988071.7891	25811714057.125	2593987617.57813
High	G1LLR5	0.000	185.173	34	31	52	31	1119	124.1	8.29	122.42	0	153631514.375	185575689.460672	146848578.467205	153631514.375	178090204.125	112532707.3125
High	D2HRA9	0.000	185.082	62	17	77	13	370	41.1	5.27	222.55	4	546403288.5	431832520.694174	568963212.216497	546403288.5	414413881.375	436006744.5
High	G1MPL4	0.000	185.035	31	35	59	35	1556	169.6	6.13	142.11	0	344364274.875	182674773.092218	74749237.6995905	344364274.875	175306300.75	57281685.5
High	G1LXR8	0.000	184.775	49	17	82	17	385	42.3	8.32	238.54	0	1127561551.8125	1141237969.10724	702143171.924551	1127561551.8125	1095204352.8125	538064943.375
High	G1LXY7	0.000	184.677	57	13	59	2	308	34.5	5.25	193.81	0	40100047.5	29215784.2998345	11259538.1432359	40100047.5	28037320	8628386.625
High	G1MBR6	0.000	184.537	43	13	66	13	400	44.3	5.68	199.29	0	1034368204.625	1227094104.07385	519557898.030857	1034368204.625	1177597346.45313	398146563.496094
High	D2GVJ7	0.000	184.375	31	26	93	21	1100	120.2	7.78	235.85	0	300757614.25	298639942.612438	493691399.514308	300757614.25	286593834	378324600.375
High	G1LZB6	0.000	184.287	79	12	273	5	180	20.5	6.19	830.13	0	1626342093.35938	2153556435.50634	2359060763.60245	1626342093.35938	2066689372.45313	1807790699.875
High	G1LCS6	0.000	184.272	56	12	86	12	307	34.2	6.52	252.76	0	1985157743.875	1676023831.54661	651839802.028186	1985157743.875	1608418792.0625	499516566.125
High	D2I0L0	0.000	184.184	39	24	85	24	601	69.8	8.78	230.22	0	877493182.40625	1037877959.72513	441151560.195332	877493182.40625	996013530.875	338062376.375
High	G1M3Z4	0.000	184.178	41	26	61	26	781	86.9	6.35	168.29	0	122366492.375	103562403.124902	158177183.157582	122366492.375	99385051.8125	121214020.875
High	G1LKA6	0.000	183.885	67	24	74	15	433	48.0	8.78	193.71	7	477040670.75	708474489.67557	291003057.643891	477040670.75	679897064.375	223000877.875
High	D2HIX7	0.000	183.875	26	23	72	3	1207	136.0	6.35	175.47	17	613231671.5	636976113.739373	665100695.382143	613231671.5	611282687.125	509678627.25
High	G1L0D0	0.000	183.834	53	16	68	10	509	58.4	6.83	214.00	6	1005539129.375	566354195.076471	500775643.528126	1005539129.375	543509413.875	383753384
High	G1L405	0.000	183.715	48	17	59	1	501	54.7	4.89	200.96	15	418969789.5	427260847.618942	190812610.073715	418969789.5	410026613.875	146223135.59375
High	G1MCK4	0.000	183.672	57	19	99	19	323	36.4	5.94	291.63	0	1219963214.5	1646199390.96514	1073607234.69205	1219963214.5	1579797366.88281	822724536.875
High	D2HD55	0.000	183.648	51	20	83	20	492	54.6	6.43	238.30	0	568575479.089844	470061772.798496	690295938.129421	568575479.089844	451101096.875	528986195
High	G1M8C5	0.000	183.647	65	21	74	21	429	48.3	8.82	196.99	0	812715053.5	768807445.837874	482197788.747023	812715053.5	737796396.5	369516839.6875
High	D2HQJ3	0.000	183.635	25	27	46	27	1571	179.7	5.71	107.19	0	140445508	115464254.84425	115281843.553863	140445508	110806823.75	88342550.5
High	G1LDG2	0.000	183.558	54	16	95	16	363	40.7	7.68	266.62	0	1325405814.875	1120043515.65536	1355515951.06489	1325405814.875	1074864810.75	1038756257.4375
High	G1LHQ0	0.000	183.401	39	22	84	22	698	78.5	6.11	209.46	0	540880105.125	569788085.016533	515967369.394279	540880105.125	546804792.5	395395076.8125
High	G1L6T1	0.000	183.370	70	17	142	17	263	29.5	6.80	325.75	0	2994463858.75	3263828944.12579	2320037791.41772	2994463858.75	3132177305	1777886694.3125
High	G1M308	0.000	183.363	35	27	87	3	948	103.6	8.15	213.07	22	445001211.25	1221799056.60947	581339599.06025	445001211.25	1172515883	445490992.375
High	D2HX02	0.000	183.341	57	18	44	18	478	50.5	7.47	137.05	0	94615774	115932310.018381	316388984.450699	94615774	111255999.1875	242454570.25
High	G1ME42	0.000	183.307	29	26	64	25	1088	122.8	5.25	166.93	1	77372520.125	185821768.049989	269766165.224731	77372520.125	178326356.75	206726665.1875
High	G1LWK3	0.000	183.284	64	20	58	20	504	54.5	5.52	192.58	0	277779888.75	195834903.055169	230204099.274712	277779888.75	187935596.3125	176409542.375
High	G1L6Y3	0.000	183.247	34	21	54	21	803	89.1	8.40	167.96	0	290927821.875	359746518.301897	211317127.141603	290927821.875	345235580.5	161936115.875
High	D2H5W1	0.000	183.105	79	16	101	16	275	30.4	6.37	284.18	0	874056696.125	976079688.347019	873916122.067197	874056696.125	936707989.3125	669697645.0625
High	G1LQA9	0.000	183.060	28	42	66	42	1905	213.8	6.80	135.87	0	159280062	74704622.7866206	502345614.992385	159280062	71691295.125	384956481.375
High	G1LXB3	0.000	182.954	46	21	55	21	562	65.0	6.39	135.06	0	326798076.75	296787022.171887	243203904.783391	326798076.75	284815654	186371527.1875
High	D2H3D1	0.000	182.835	45	18	60	18	463	53.9	7.34	165.63	0	905340705.75	1039297875.7564	191468073.489133	905340705.75	997376172.375	146725429
High	G1M2Y7	0.000	182.823	57	23	60	2	470	53.6	6.28	175.18	18	154793817.875	463630450.361149	479448647.113619	154793817.875	444929191.875	367410123
High	D2HEB6	0.000	182.823	19	30	43	30	2382	260.4	5.76	100.62	0	53844687.25	54186071.9865811	73807702.807387	53844687.25	52000392.125	56560170.375
High	G1M4Y1	0.000	182.696	65	18	97	17	326	36.7	7.24	252.82	1	1579065720.375	1724016849.86707	2601889164.26523	1579065720.375	1654475937.01563	1993874471.5
High	G1LBT2	0.000	182.618	41	23	61	21	775	86.0	6.90	156.22	2	115347176.875	218722719.446537	135800833.195685	115347176.875	209900196.875	104066621.375
High	D2H1V0	0.000	182.592	33	22	88	21	614	70.3	5.91	213.98	0	1046600834.375	1032410978.56205	210073434.964986	1046600834.375	990767068.9375	160983052.1875
High	D2H2Z8	0.000	182.402	39	31	75	27	1075	118.9	7.42	150.78	4	901645345.5	1353748415.63339	309398517.026428	901645345.5	1299142858.5	237097649.3125
High	D9ZLV7	0.000	182.341	67	12	133	11	192	21.9	9.95	450.15	2	1218587868.03125	1441950989.35719	3139610851.34448	1218587868.03125	1383787643.625	2405940273.28906
High	G1LB27	0.000	182.326	48	12	117	12	412	45.9	9.51	378.08	0	1478480782.1875	1603054241.45152	2299581585.72388	1478480782.1875	1538392544.375	1762210735.90625
High	G1MAY5	0.000	182.272	41	24	85	24	580	66.7	9.60	196.06	0	617190001	1184677074.9899	3202475258.61545	617190001	1136891274.5	2454114399.4375
High	G1M3M4	0.000	182.246	29	24	49	23	1416	152.2	5.17	130.60	0	192782688.734375	118468775.788556	33504541.5212502	192782688.734375	113690152.648438	25675132.875
High	D2GVM6	0.000	182.213	68	21	58	21	458	49.3	6.09	155.49	0	481015220.75	210795215.438232	204007507.448212	481015220.75	202292461.125	156334622.8125
High	G1L0I3	0.000	182.115	52	18	94	17	435	47.5	7.50	267.48	2	4400352617.25	3881963063.8522	2723226082.46523	4400352617.25	3725378019.375	2086857134.625
High	D2I6I8	0.000	181.999	43	15	101	1	424	48.1	7.68	286.84	0		17063209.1987095			16374938
High	D2HEE0	0.000	181.754	53	21	79	21	396	44.3	8.25	195.24	0	308052237.5625	336242516.939641	565785531.527126	308052237.5625	322679649.75	433571630.625
High	G1L337	0.000	181.719	32	36	66	34	1321	150.0	7.37	131.82	1	149461739.625	169302558.163353	249731882.167405	149461739.625	162473475	191374033.6875
High	D2I687	0.000	181.698	33	16	51	4	627	69.2	5.64	164.53	0	36780488.5	50052947.8425791	48812508.8678317	36780488.5	48033984	37405903.625
High	G1LWK2	0.000	181.690	60	11	117	11	264	27.7	7.61	382.04	0	1320293769.04688	1076376471.46237	1984937203.69443	1320293769.04688	1032959145	1521093085.875
High	G1L9X1	0.000	181.594	9	29	51	18	4367	478.2	6.42	121.40	2	39529187.25	95188405.798616	165900375.045704	39529187.25	91348832.75	127132441.75
High	G1M5Q5	0.000	181.412	75	19	68	19	386	43.2	7.17	201.37	0	480084220.59375	585070462.98042	651734817.705525	480084220.59375	561470731.875	499436114.75
High	D2HA12	0.000	181.380	16	14	62	14	1499	144.9	6.71	186.24	0	523489216.5	1433321802.76054	2074627948.10795	523489216.5	1375506528.75	1589824716.75
High	D2HMV3	0.000	181.341	80	12	141	1	180	19.5	6.43	473.99	0	5914205	5120012.71104404		5914205	4913489
High	G1MBI5	0.000	181.265	32	21	43	21	1000	111.1	6.86	113.01	0	102750772	72325117.6028346	59891307.7461409	102750772	69407771	45895786.5
High	D2HGR2	0.000	181.060	53	11	309	6	210	23.5	7.30	847.81	7	10671057781.0693	12162197297.445	14208331478.8958	10671057781.0693	11671616070	10888100003.4375
High	D2HHM0	0.000	181.052	70	20	102	1	341	37.8	6.09	234.89	0	396079543	312889865.513493	120361701.141415	396079543	300268964	92235336.75
High	G1L9R0	0.000	181.047	54	15	65	15	471	52.3	8.46	184.92	0	712817015.625	933263077.785583	57413586.1570701	712817015.625	895618453.625	43997063.875
High	D2GWY6	0.000	181.043	74	19	72	19	287	33.0	7.15	186.18	0	395023366	295939056.658225	610282580.398933	395023366	284001892.5	467670519.625
High	G1LTI4	0.000	181.020	56	16	74	16	327	37.5	8.38	194.83	0	1625251044.75	870838015.048869	31818152.3279273	1625251044.75	835711403.3125	24382822.5
High	G1L7H8	0.000	180.928	37	25	53	25	869	92.9	5.07	144.32	0	275306443.125	203087700.794613	71859338.8164891	275306443.125	194895841.125	55067104
High	G1LB84	0.000	180.891	43	13	222	13	294	32.6	4.75	556.68	0	5821437845.125	7285056035.065	8734764390.48967	5821437845.125	6991201919.375	6693607080.5625
High	G1M7Z9	0.000	180.853	64	16	102	14	324	36.7	5.88	290.41	3	1164957871.625	1389083131.14498	688594861.006068	1164957871.625	1333052293.0625	527682629
High	D2HL50	0.000	180.812	42	19	48	15	666	72.3	5.41	146.09	0	315796833.75	391767415.46098	195100254.634032	315796833.75	375964864.75	149508834.75
High	G1LZX8	0.000	180.791	39	26	68	2	712	81.7	6.04	175.02	21	308072831.875	294861990.838316	61700859.4208052	308072831.875	282968271.8125	47282478.5
High	D2HIF5	0.000	180.705	50	20	110	1	544	61.8	6.04	259.28	0	3995087.75	4234766.41894462	672176.859036254	3995087.75	4063950.5	515101.21875
High	G1LA46	0.000	180.687	57	11	120	8	289	33.4	6.29	349.02	0	996635691.25	1594794922.90418	1657659727.20516	996635691.25	1530466378.34375	1270294468.30469
High	G1LPD0	0.000	180.661	69	15	81	15	308	33.9	7.83	242.64	0	1935249364.75	1401500645.94004	146142567.946258	1935249364.75	1344968928	111991678.75
High	G1L4D9	0.000	180.642	41	21	71	21	723	82.2	5.99	195.35	0	437652564.5625	634507786.400193	210706402.701062	437652564.5625	608913923.625	161468106.75
High	G1LTX4	0.000	180.604	19	18	97	18	923	106.3	10.01	209.30	0	1489671169.375	1494446160.92125	1646859787.93335	1489671169.375	1434165340.4375	1262018280.5625
High	G1MN82	0.000	180.576	64	17	70	17	347	37.7	6.02	177.67	0	677308045	1155002468.14729	1123132653.06086	677308045	1108413639.28125	860676755.875
High	G1MAC4	0.000	180.542	33	28	75	25	1057	117.5	8.10	183.73	3	535097873.75	597460443.317609	158565936.26575	535097873.75	573360943	121511929.375
High	D2HCJ7	0.000	180.423	29	29	77	29	1071	122.2	5.83	169.90	0	223752026.3125	375849383.39592	281137856.141037	223752026.3125	360688911.375	215440996.5
High	D2H081	0.000	180.412	45	25	64	24	739	82.5	5.29	152.56	1	660972624.03125	649279490.537526	520359445.104481	660972624.03125	623089788	398760803.4375
High	D2HU73	0.000	180.306	46	22	63	22	589	66.3	6.28	186.01	0	290675295.875	310033245.403836	293862166.599907	290675295.875	297527570.125	225191864.5
High	G1LMP2	0.000	180.285	53	21	73	21	491	54.9	6.58	202.82	0	637809084.75	684610683.655359	649889343.372005	637809084.75	656995842.25	498021894.570313
High	D2H1T9	0.000	180.274	27	25	71	2	1130	131.6	7.91	158.41	19	171631646.0625	238070867.863067	373308432.315281	171631646.0625	228467907.5	286072967.0625
High	G1LH23	0.000	180.222	60	22	68	22	459	54.4	7.44	140.32	0	914686443.25	813311495.191566	228816856.458407	914686443.25	780505305.5	175346473.25
High	D2HL15	0.000	180.110	44	16	89	16	412	46.2	8.32	275.96	0	1644977156.4375	1482317862.10448	305624892.314261	1644977156.4375	1422526255.5	234205852.8125
High	D2HVP7	0.000	180.094	38	31	73	25	964	108.6	7.99	167.73	4	209265675.75	307215745.519583	102647174.570206	209265675.75	294823718.5	78660376.375
High	G1LNL0	0.000	180.075	19	16	96	14	1052	115.0	7.50	236.29	1	833718162.1875	277556612.037911	160328953.610971	833718162.1875	266360932.5	122862961.28125
High	G1LY51	0.000	180.065	48	13	73	13	230	26.2	4.92	241.24	0	1658588776	1892544604.11994	754648879.687984	1658588776	1816205861.03125	578301011.75
High	G1L683	0.000	179.810	45	12	61	12	423	47.8	6.65	210.96	0	1098232562.75	1010529117.18777	670368214.458917	1098232562.75	969767846.625	513715221.875
High	D2HRG8	0.000	179.739	59	21	161	21	315	36.0	5.14	371.26	0	2524706274.1875	2767378423.29539	1768576824.20019	2524706274.1875	2655751891.46875	1355292235
High	G1LF91	0.000	179.708	38	13	102	11	517	55.3	8.95	314.15	0	606722365.4375	774113534.070774	604477803.283062	606722365.4375	742888455.375	463222214.5
High	G1LJM7	0.000	179.682	26	28	47	28	1503	172.6	8.43	132.80	0	256566654.75	179791321.961408	116093407.270324	256566654.75	172539158.125	88964466.375
High	D2HFY5	0.000	179.664	33	25	84	1	919	100.3	6.80	213.43	0	7038561	7668572.86619307	6643238.93507879	7038561	7359249	5090833.5
High	G1M6D0	0.000	179.646	46	29	68	25	725	81.3	7.84	170.74	3	811661122.25	825583977.564828	115812260.845938	811661122.25	792282758.125	88749018.8125
High	G1MD69	0.000	179.642	39	25	70	25	814	91.3	6.09	185.26	0	299784434.125	416485981.873785	352165390.133293	299784434.125	399686369.171875	269870673.5
High	D2GZA7	0.000	179.639	39	25	64	1	690	78.9	5.73	173.43	0	7516085.5	4417874.88496875		7516085.5	4239673
High	G1M340	0.000	179.615	34	28	71	27	1092	121.1	8.05	170.39	0	266413003.75	195147961.637465	194889941.647321	266413003.75	187276363.75	149347668.125
High	G1LUU2	0.000	179.526	23	28	78	28	1373	156.6	7.37	187.13	0	125883280.75	117685323.16725	209732528.83488	125883280.75	112938301.8125	160721809.6875
High	D2HYA2	0.000	179.451	66	18	118	4	359	40.0	6.74	298.23	14	1440704603.1875	1525154482.08979	2207869398.28169	1440704603.1875	1463634993.5	1691930036.875
High	G1MIN1	0.000	179.362	37	23	70	2	813	90.2	7.75	178.66	0	33861601	48414942.3314398	41553846.3985562	33861601	46462050	31843460
High	G1MC17	0.000	179.353	50	14	89	14	359	39.7	6.14	344.09	0	1497559135.25	1655685626.06939	2220952257.02471	1497559135.25	1588900959.875	1701955666.875
High	G1LU01	0.000	179.327	32	26	89	22	878	97.8	5.69	178.22	1	232990423.5	326189208.670606	494431512.311179	232990423.5	313031857.375	378891762.125
High	G1L0N5	0.000	179.320	65	23	94	21	366	42.1	8.57	207.34	1	339929674.15625	403807616.204336	366423193.441593	339929674.15625	387519405.1875	280796684.65625
High	D2H072	0.000	179.189	62	21	73	21	363	39.7	7.56	207.77	0	545465752.5	766845964.616122	834789694.298546	545465752.5	735914034.6875	639714359.625
High	G1M6E9	0.000	179.113	31	29	94	14	1031	113.9	7.49	212.31	0	129417987	102631042.879456	16805.6522496533	129417987	98491259.4375	12878.4736328125
High	D2H1Z0	0.000	179.007	64	17	93	17	368	41.0	7.83	223.64	0	776767424.25	927854887.350872	851360849.889588	776767424.25	890428411	652413134.25
High	D2HU13	0.000	178.750	40	15	689	4	376	41.9	5.48	1562.94	0	64306649.5	73778163.2176149	61485880.9426763	64306649.5	70802205.75	47117736.625
High	D2HGH4	0.000	178.619	51	23	68	23	607	66.2	5.26	183.94	0	895754073.25	301344491.178836	527761595.739379	895754073.25	289189290.375	404433204.625
High	D2I5L3	0.000	178.570	52	23	106	23	495	55.8	6.02	283.78	0	1027671745.3125	755865600.475276	807799244.688628	1027671745.3125	725376580.6875	619031092.5625
High	G1LUD4	0.000	178.551	50	15	62	12	392	43.5	8.76	192.14	4	592981525.625	661955432.326598	670626610.45495	592981525.625	635254425.875	513913235.375
High	G1M9Q4	0.000	178.507	44	20	114	1	390	45.6	5.62	275.59	0	34084788	36924549.3818395	18553865.6372122	34084788	35435140	14218161
High	G1MAI7	0.000	178.486	61	19	57	19	397	44.5	7.58	158.65	0	169153781.8125	203715840.477484	370793840.832886	169153781.8125	195498643.8125	284145990.375
High	D2HWU9	0.000	178.445	41	18	63	9	538	60.2	4.97	185.72	1	131746163.5	147133442.50113	141152540.887291	131746163.5	141198585.25	108167731.25
High	G1LXH9	0.000	178.415	75	17	118	14	334	36.6	8.27	308.63	3	1326978755.25	2044206036.64077	1379658592.1843	1326978755.25	1961749792.75	1057257197.625
High	G1LMY7	0.000	178.327	24	23	53	22	1145	124.9	5.95	132.82	1	105247380.375	99651851.3475032	378962864.94077	105247380.375	95632238.25	290406060.5
High	D2GVV9	0.000	178.309	33	25	63	25	680	79.9	8.82	151.01	0	487644834.5	473976148.312275	517521274.665808	487644834.5	454857579.9375	396585862.375
High	D2H0G1	0.000	178.251	20	19	108	19	1360	138.3	5.02	274.13	0	657523343.46875	1669015571.49168	2041700909.34202	657523343.46875	1601693221.125	1564592134.625
High	G1LTR3	0.000	178.236	47	20	88	18	530	59.3	10.10	235.90	2	659476714.4375	888179154.95431	925971248.725545	659476714.4375	852353061.25	709588425.03125
High	G1LHA7	0.000	178.129	43	17	96	17	533	61.0	5.45	307.07	0	1319099304.875	921443181.035446	453951148.151065	1319099304.875	884275330.875	347870930.875
High	G1LZB1	0.000	178.075	31	29	53	29	1115	127.3	6.28	125.70	0	209052223.25	187285362.675601	80099806.3405509	209052223.25	179730915	61381922.5
High	D2HX06	0.000	178.013	59	14	110	8	340	37.2	6.00	317.53	3	894614319.125	1013909176.17865	2307053436.9035	894614319.125	973011565.65625	1767936549.875
High	D2GWU0	0.000	177.995	67	15	81	2	286	30.7	6.38	252.59	0	28619221.5	111504597.37454	48076159.5216984	28619221.5	107006885.25	36841625.875
High	G1LT54	0.000	177.989	60	18	102	18	391	42.0	6.14	268.60	0	716201885.5	575882242.829548	2643223980.01666	716201885.5	552653132.9375	2025550084.375
High	D2H2F0	0.000	177.887	45	23	83	23	659	73.8	8.02	189.28	0	811508410.125	876035190.293757	594936198.108517	811508410.125	840698942.375	455910310.8125
High	D2H298	0.000	177.825	27	30	66	30	1426	161.4	5.60	132.69	0	270019675.3125	149045335.830269	191443695.228055	270019675.3125	143033359.375	146706747.5
High	G1M516	0.000	177.799	37	25	76	25	785	90.2	9.29	159.28	0	261873955	319454478.69107	113768139.364585	261873955	306568783.25	87182571.75
High	G1L983	0.000	177.790	66	20	121	20	314	35.5	5.88	315.97	0	1585055786.8125	1675589366.79463	975582309.536142	1585055786.8125	1608001852.125	747606273.375
High	D2HVN5	0.000	177.789	45	24	80	20	595	66.2	5.48	177.55	4	1772690675.67188	1719650470.2817	99057896.7963346	1772690675.67188	1650285682.17188	75909848.25
High	D2HP08	0.000	177.784	26	20	57	20	888	99.7	8.28	151.58	0	271368519.625	422864330.612363	94285891.9911011	271368519.625	405807437.25	72252975.125
High	G1MJ13	0.000	177.769	49	21	54	21	616	70.0	6.28	144.14	0	238723410.875	332338965.728519	72494172.3739621	238723410.875	318933554.375	55553588.375
High	G1LF72	0.000	177.763	32	22	38	1	837	96.7	7.09	105.30	16	181795729.75	213536980.958607	35393429.8758395	181795729.75	204923633.25	27122622
High	D2HH84	0.000	177.740	67	17	79	15	276	31.0	8.06	252.32	2	779444667.125	751938828.948967	651378826.780114	779444667.125	721608201.625	499163312.5
High	G1MF75	0.000	177.703	64	25	68	23	455	53.2	7.81	175.99	1	313900055.9375	334289263.667594	137778919.508559	313900055.9375	320805184	105582464.5
High	G1MC92	0.000	177.660	59	20	182	18	470	54.1	8.95	514.12	2	1895002656.70313	3287506914.09612	6504475528.61638	1895002656.70313	3154900187.0625	4984496605.4375
High	G1L142	0.000	177.629	62	24	84	24	461	53.7	5.86	230.03	0	1330856401.125	1178363022.70224	616039781.475181	1330856401.125	1130831909.375	472082366.375
High	G1LSP4	0.000	177.568	48	22	90	22	560	63.4	8.53	226.75	0	735978162.5	672514824.531789	266799917.895745	735978162.5	645387888.5	204453576.5
High	D2HDG5	0.000	177.484	68	14	77	14	277	29.9	7.68	262.25	0	455755595.75	792922566.495325	519274520.528944	455755595.75	760938796.09375	397929406.21875
High	D2HTT6	0.000	177.467	27	13	50	13	432	51.5	9.79	169.37	0	805209889	793686319.510038	702669844.361303	805209889	761671741.9375	538468541.9375
High	G1L036	0.000	177.464	42	18	68	18	583	65.0	6.35	190.50	0	748463021	739878229.192031	1162800084.62108	748463021	710034085	891074622.25
High	D2HR59	0.000	177.338	54	19	119	19	452	51.3	8.07	298.12	0	749429751.75	723311300.492533	1722174680.82611	749429751.75	694135409.25	1319733437.8125
High	G1LSQ7	0.000	177.243	42	24	57	24	887	101.3	8.35	162.47	0	641516188.5	928435738.124203	292579091.45768	641516188.5	890985832.25	224208620.9375
High	G1LJG9	0.000	177.189	48	27	108	21	666	74.6	9.64	221.06	3	675647501.5	990234171.342905	1416026121.92585	675647501.5	950291529.125	1085126289.875
High	G1LXE3	0.000	177.162	33	28	141	17	896	102.8	5.45	304.94	1	68988821	74969703.3502565	61655910.7989506	68988821	71945683.25	47248033.5625
High	G1M256	0.000	177.150	43	25	41	25	914	97.6	6.87	101.13	0	89523534.25	114354740.213359	37481207.4346795	89523534.25	109742063.125	28722523.5
High	G1M3H3	0.000	177.143	43	21	55	21	679	73.8	8.38	161.93	0	228427906.9375	189465912.822158	231938249.809324	228427906.9375	181823509.25	177738453.125
High	G1LAU6	0.000	177.110	48	18	169	18	466	51.7	8.06	442.00	0	5363360259.1875	5405957780.03487	2926340173.12125	5363360259.1875	5187900027.9375	2242507116.07813
High	G1LB52	0.000	177.081	21	36	74	35	2077	232.3	5.76	118.76	1	241977961.625	433002844.274015	411330331.98679	241977961.625	415536998.125	315209832.75
High	D2I190	0.000	176.996	48	23	83	21	591	66.6	6.71	209.14	2	1628065993.75	1156040268.34577	810451451.448281	1628065993.75	1109409578.1875	621063526.3125
High	D2HZX6	0.000	176.944	34	25	58	24	1063	120.7	5.40	139.60	1	167284582.8125	183957396.068651	61491458.9958635	167284582.8125	176537187.125	47122011.1875
High	G1M2V2	0.000	176.919	39	22	185	22	507	54.7	7.65	483.69	0	5529613188.21875	5475935604.33287	4181247407.4685	5529613188.21875	5255055187.375	3204165104.0625
High	G1LKZ5	0.000	176.871	27	25	33	25	1384	152.3	7.27	97.35	0	11955858.8125	81708921.231311	260183552.514205	11955858.8125	78413064.25	199383336.6875
High	D2HNA0	0.000	176.864	49	15	57	15	413	46.9	7.50	185.82	0	569442445.25	620712896.464643	607311567.832078	569442445.25	595675472.125	465393779.25
High	D2HWK1	0.000	176.854	52	12	755	12	113	12.5	11.00	1723.65	0	26201900648.1074	46730902019.3378	70948543071.8533	26201900648.1074	44845938084.6484	54369144836.7422
High	D2H8B9	0.000	176.826	52	25	103	1	563	62.6	7.21	248.43	0	5080083.5			5080083.5
High	D2HXV0	0.000	176.597	30	24	69	22	934	107.9	6.83	182.27	0	588344729.375	509005658.776494	334305777.740503	588344729.375	488474120.375	256184531.25
High	G1M3F3	0.000	176.512	51	23	67	23	627	69.3	6.89	167.14	0	378205440.25	427271750.269379	254251004.272081	378205440.25	410037076.75	194837118.25
High	D2HLT5	0.000	176.378	40	19	66	19	802	90.3	5.94	178.28	0	531240667	438046900.538114	286200822.405159	531240667	420377594.5	219320838.625
High	D2HKN7	0.000	176.287	46	14	48	14	419	46.4	8.05	169.05	0	253464773	263308246.714171	253438636.548655	253464773	252687297.25	194214586.25
High	G1LTT3	0.000	176.262	47	20	110	1	557	63.4	6.34	251.46	17	1748821167.75	1862748946.44022	424762641.289369	1748821167.75	1787612057.75	325503253
High	G1LJ41	0.000	176.222	62	14	82	13	371	40.6	5.39	287.96	1	745111657.125	631554078.60716	1322684542.39453	745111657.125	606079358.25	1013596958.375
High	G1LD31	0.000	176.168	47	19	51	19	501	56.7	6.64	128.57	0	294631399	356077729.994226	451862610.056118	294631399	341714778.5	346270446.5625
High	D2HFV4	0.000	176.153	38	24	73	23	788	89.3	5.21	186.57	0	493084601.25	451778580.55276	342470869.815545	493084601.25	433555385.75	262441588.1875
High	D2H1H9	0.000	176.149	56	16	93	5	318	34.8	7.20	278.23	0	176837364.5	233387325.880707	37110472.1405278	176837364.5	223973283.5	28438422.375
High	G1LK12	0.000	176.108	26	24	69	1	1173	135.8	7.58	149.63	0		3530670.09374775	9670047.69310189		3388255	7410331.5
High	G1MC31	0.000	176.097	20	37	77	37	2071	236.7	6.64	153.78	0	229129682.875	533202988.105382	1081673787.54956	229129682.875	511695412.625	828906081.4375
High	G1MHD2	0.000	176.093	40	21	87	15	527	58.1	6.49	213.35	6	1587420715.75	1496914453.15698	1394882988.88732	1587420715.75	1436534070.25	1068923926.6875
High	G1L0T8	0.000	175.949	43	26	85	26	692	79.8	5.33	205.96	0	1341681002.25	913413490.681247	572926317.995424	1341681002.25	876569530.625	439043743.75
High	D2HM06	0.000	175.946	65	18	84	18	352	39.8	5.24	219.40	0	1236484893.15625	1122515057.40272	886258016.13134	1236484893.15625	1077236659	679155460.5
High	G1L9L4	0.000	175.938	39	20	95	20	564	61.5	8.02	249.69	0	657940247.5625	752474856.716331	274246618.166693	657940247.5625	722122607.875	210160116.875
High	G1LPY6	0.000	175.819	37	11	60	11	426	47.1	4.83	223.29	0	577508238.25	577039594.283423	191940739.951075	577508238.25	553763800.8125	147087641.8125
High	G1M9R3	0.000	175.801	29	35	140	2	1070	124.2	8.57	267.25	15	119073517.25	169826089.362101	299035326.838634	119073517.25	162975888.75	229156150.25
High	G1LXP8	0.000	175.788	57	17	133	17	355	40.5	7.28	352.09	0	1104270645.75	1778327620.8936	512729950.612279	1104270645.75	1706595998.25	392914184.5625
High	G1LGC2	0.000	175.779	60	17	76	4	376	41.3	8.50	225.33	12	708392400.796875	618632732.162958	331808399.045675	708392400.796875	593679214.5	254270745.03125
High	D2HK92	0.000	175.726	44	24	58	24	597	68.7	7.15	148.84	0	306337034.0625	575183367.149738	150813625.754124	306337034.0625	551982447.5	115571194.375
High	G1MEE3	0.000	175.665	51	24	64	24	736	83.2	6.10	168.60	0	138661053.0625	162999545.618461	978830793.812654	138661053.0625	156424704.3125	750095645.3125
High	G1LSB5	0.000	175.662	20	27	56	26	1948	210.3	9.03	138.08	0	61144938.75	158675939.134198	82333893.8782578	61144938.75	152275497.25	63093943.96875
High	G1LY76	0.000	175.597	54	13	86	13	285	31.6	6.54	289.31	0	1609266245.125	1649287051.76672	831241204.422722	1609266245.125	1582760482.0625	636995088
High	G1KZJ9	0.000	175.522	68	23	75	23	400	45.5	9.31	198.84	0	405598781.1875	514196037.986446	439143353.553382	405598781.1875	493455137.53125	336523451.5
High	D2HVU4	0.000	175.472	39	22	37	1	695	80.2	5.95	102.40	0		4198370.32566521	3178257.63654709		4029022.5	2435556
High	G1LPA5	0.000	175.470	45	9	417	9	233	24.9	5.77	1286.97	0	29515769844.4531	18528040839.6415	11753041239.393	29515769844.4531	17780683368.375	9006566925.125
High	G1LQC0	0.000	175.439	41	19	54	17	722	77.4	8.53	161.34	2	590053887.851563	723452369.741047	547183931.789275	590053887.851563	694270788.25	419316890.125
High	D2H6B6	0.000	175.342	34	33	56	33	1155	128.5	6.81	132.04	0	524585506	249627328.180664	102865112.002755	524585506	239558219.9375	78827385.75
High	G1M3A5	0.000	175.323	29	23	55	23	1196	130.1	7.01	156.55	0	177959284.5	196629681.627985	150001787.347518	177959284.5	188698316.25	114949068
High	D2H1X5	0.000	175.311	22	16	85	15	913	99.6	5.20	236.40	0	527831197.09375	729071178.937537	971988689.570062	527831197.09375	699662954	744852417.75
High	F2X201	0.000	175.307	64	22	210	3	264	29.9	9.73	477.00	22	3409224275.0625	4419821190.68383	8559184903.43482	3409224275.0625	4241540798.43359	6559057361.16406
High	G1LYQ9	0.000	175.277	49	15	51	15	453	51.2	8.44	135.56	0	567260813.75	132527774.112602	342418979.06904	567260813.75	127182059.3125	262401823.375
High	G1LRL9	0.000	175.172	36	22	66	22	657	75.0	5.87	156.77	0	254073079.625	348010417.270478	219946115.290382	254073079.625	333972873.4375	168548664.71875
High	G1L8N2	0.000	175.116	52	27	68	27	732	82.5	7.71	141.35	0	150540017.09375	182042240.137358	381605586.24516	150540017.09375	174699282	292431225.375
High	G1MBD1	0.000	175.102	26	30	79	21	1272	146.2	5.54	189.63	8	289909080.5	213549359.256594	400939747.084523	289909080.5	204935512.25	307247340.625
High	D2HPE0	0.000	175.027	48	19	70	19	530	59.8	6.93	206.06	0	259126660	234944935.758379	312337195.75751	259126660	225468064.75	239349611.6875
High	D2H9V6	0.000	175.005	32	34	141	1	967	113.5	8.66	269.77	0	2341662.25	21756308.698464	14558988.7784527	2341662.25	20878734	11156815
High	G1MFB6	0.000	174.960	46	16	58	15	418	47.0	6.06	170.82	1	331100103.25	370727238.817683	528877009.249132	331100103.25	355773376.5	405287966.0625
High	G1M7W9	0.000	174.825	43	21	46	21	687	77.6	6.43	113.48	0	255514929	220761626.445464	192095594.155506	255514929	211856861.375	147206309.375
High	G1M6A3	0.000	174.763	26	19	52	18	953	108.9	6.32	140.88	1	209014163	163517755.420353	318926076.954538	209014163	156922011.3125	244398789.875
High	D2HE46	0.000	174.701	31	32	71	32	1250	142.1	6.25	144.43	0	152834800.625	233286323.413405	589322229.225497	152834800.625	223876355.125	451608225.46875
High	D2HP52	0.000	174.679	41	14	85	14	549	59.1	6.28	264.26	0	852731730.0625	574844759.766992	2145008665.10357	852731730.0625	551657498.375	1643758726.25
High	G1L8W3	0.000	174.656	52	15	108	15	389	42.9	9.36	294.41	0	5015811291.49609	3892966470.87786	122021464.149137	5015811291.49609	3735937586.78906	93507243
High	D2HHL1	0.000	174.607	52	15	193	15	303	33.4	7.96	524.85	0	5880512034.8125	5973923303.36617	1304350586.03774	5880512034.8125	5732955774.625	999547317.8125
High	D2HX32	0.000	174.513	51	21	49	21	641	71.0	9.41	130.95	0	440936063.9375	257361473.840422	111568974.951665	440936063.9375	246980396.75	85497312.5
High	G1LFI1	0.000	174.441	42	26	77	26	824	91.4	7.31	181.26	0	612792974.125	437869284.948334	297595100.713712	612792974.125	420207143.3125	228052479.0625
High	G1L3A9	0.000	174.421	16	38	61	3	2884	326.6	5.82	132.83	0	60621200.65625	12313812.4880054	80916.168652443	60621200.65625	11817115.625	62007.515625
High	G1LDB6	0.000	174.341	66	12	89	12	159	17.2	10.18	275.52	0	2970915918.875	4063054083.91696	5406556597.33201	2970915918.875	3899164450.25	4143141578.125
High	G1LB32	0.000	174.308	41	25	60	19	850	97.4	4.93	165.00	0	144215383.75	156565625.981511	144707228.092512	144215383.75	150250306.875	110891752
High	G1LII1	0.000	174.298	26	30	68	22	1258	144.4	5.59	146.85	0	110957277.75	33380878.6772049	246288940.348889	110957277.75	32034408.7890625	188735645.4375
High	D2H334	0.000	174.297	44	25	73	2	710	79.7	6.57	163.24	0	87906808.75	53587999.6808367	63728749.9605887	87906808.75	51426444	48836487.5
High	G1LFG6	0.000	174.258	59	18	55	18	254	29.2	8.37	163.78	0	773754447.875	518180909.341353	81667730.7189092	773754447.875	497279272.875	62583451.15625
High	G1L6F4	0.000	174.132	63	20	98	1	372	41.3	7.37	225.14	16	2036781009.75	2157601937.70414	862008439.312658	2036781009.75	2070571693	660572573.5625
High	G1LRD5	0.000	174.034	54	24	50	24	623	70.9	8.16	134.47	0	278148011.5625	278842074.030496	109492919.680611	278148011.5625	267594543.375	83906394
High	G1M7G1	0.000	173.999	45	19	131	9	531	57.9	6.89	381.03	0	591459131.875	476322960.849594	31927748.2316186	591459131.875	457109730.125	24466807.8125
High	G1MJ50	0.000	173.961	27	21	69	21	764	89.2	5.81	164.93	0	182135478.875	349801207.921407	1261231969.75255	182135478.875	335691429.75	966504746.5
High	G1M1C2	0.000	173.930	48	20	78	20	508	57.5	8.63	165.54	0	1119848331.75	839969338.313025	718261390.216636	1119848331.75	806087862.875	550416624
High	G1LBS4	0.000	173.925	46	27	82	27	725	83.5	7.05	154.86	0	334409598.625	452055701.991399	305009554.172161	334409598.625	433821329.0625	233734308.125
High	D2H9G7	0.000	173.900	50	16	74	12	472	52.2	7.91	201.95	4	1014706957.75	1014875837.83021	181510791.983553	1014706957.75	973939235.5	139094985.0625
High	G1LLA4	0.000	173.860	22	21	63	1	1265	142.4	6.19	157.97	0
High	D2HIS2	0.000	173.794	38	20	51	20	691	78.5	5.66	137.21	0	404776237.4375	285260878.53757	89567763.482134	404776237.4375	273754435.375	68637388.375
High	G1LIR5	0.000	173.786	30	25	58	25	1122	120.7	6.95	153.00	0	441162022.75	158786169.055262	217369532.367172	441162022.75	152381280.875	166574182.875
High	D2H1E5	0.000	173.780	45	23	63	23	622	70.4	6.71	139.55	0	454681433.75	329356186.93632	114715475.373381	454681433.75	316071090.625	87908532.375
High	D2I1K4	0.000	173.765	58	21	421	13	434	47.1	7.44	1296.37	0	455616618.25	389273128.369643	412136783.59567	455616618.25	373571188.625	315827831.125
High	D2HB85	0.000	173.622	63	22	65	1	422	48.4	6.55	176.23	0	45009523.375	36553954.8734093	88456505.9657758	45009523.375	35079494	67785811.75
High	G1L8S2	0.000	173.608	45	22	63	22	730	81.4	9.14	153.38	0	298315871.375	275160242.478176	272819818.338231	298315871.375	264061224.25	209066734.5
High	G1MET3	0.000	173.579	36	30	64	30	855	97.5	6.00	151.38	0	149782501.75	232497908.595068	619331117.088187	149782501.75	223119742.25	474604576.0625
High	G1M667	0.000	173.505	31	16	46	16	612	69.0	5.43	138.99	0	151709670.375	255705674.591054	296183004.14834	151709670.375	245391386.75	226970364.0625
High	G1LU31	0.000	173.418	29	36	84	35	1283	144.3	5.81	152.92	0	323169369.875	237383257.525954	125290691.201797	323169369.875	227808033	96012510.5
High	D2GVX8	0.000	173.405	46	24	76	24	596	67.5	6.92	182.71	0	317024548.9375	456559199.798177	330622942.688784	317024548.9375	438143171.25	253362308.5
High	D2HFH5	0.000	173.384	47	15	58	14	444	48.4	4.82	187.80	0	740982446.242188	671386213.231923	473027888.927376	740982446.242188	644304801.5	362489780.5
High	G1LSW9	0.000	173.324	59	13	119	13	323	37.4	4.49	391.57	0	1389914588.1875	1558335084.26224	1180180605.71417	1389914588.1875	1495477204.25	904393628.21875
High	D2HTS9	0.000	173.303	18	29	53	29	2043	229.7	7.01	128.42	0	106724916.25	91207907.819399	191494926.89764	106724916.25	87528894.375	146746007.25
High	D2HRY4	0.000	173.297	19	28	45	28	1843	199.1	8.13	103.36	0	35095523.0390625	156520460.602909	237299414.899955	35095523.0390625	150206963.3125	181846810.375
High	G1LZJ7	0.000	173.270	61	21	55	21	586	64.4	7.25	164.08	0	170859039.375	285692616.552345	213359610.432259	170859039.375	274168758.5625	163501307.5625
High	G1MBA4	0.000	173.268	44	18	69	11	615	64.7	7.27	209.33	6	589729871.4375	640536447.487979	295338042.498027	589729871.4375	614699409.25	226322854.75
High	G1LAU1	0.000	173.068	67	14	62	14	342	38.5	8.98	224.59	0	943516177.25	835265837.380219	204158687.671944	943516177.25	801574085	156450474.9375
High	D2H092	0.000	173.021	43	15	56	14	583	66.3	5.47	156.39	0	505381870.75	529088961.835205	82378536.7768312	505381870.75	507747332.03125	63128154.625
High	G1MCF3	0.000	172.876	27	31	70	31	1450	164.1	6.05	164.82	0	228671904.289063	371137197.680074	163964416.560926	228671904.289063	356166799.03125	125648881.9375
High	G1MJ39	0.000	172.750	38	10	198	10	224	25.2	6.68	731.52	0	2790485416.3125	3155557436.42709	2170397430.89175	2790485416.3125	3028273097.70313	1663214594.1875
High	D2HA11	0.000	172.742	24	25	129	23	1440	135.6	6.64	319.07	1	4558401512.35156	7630531910.58782	9598262260.28895	4558401512.35156	7322742485.76563	7355321031.5
High	D2HSA1	0.000	172.680	26	29	55	29	1652	183.9	8.97	127.53	0	185543063.125	186922557.877298	270145152.315255	185543063.125	179382744.5	207017089.8125
High	G1LT74	0.000	172.613	73	10	80	10	245	26.7	4.74	256.42	0	1425849019.5625	1316478935.8187	1052096675.20118	1425849019.5625	1263376701.375	806240608.1875
High	G1L1L0	0.000	172.529	40	23	60	23	729	78.8	5.48	166.76	0	252252476.1875	232669449.854754	125438987.668352	252252476.1875	223284364.125	96126152.75
High	G1LS60	0.000	172.528	35	10	112	10	411	46.4	5.58	319.55	0	2802738104.875	2055566226.06528	932339434.618905	2802738104.875	1972651751.1875	714468480.4375
High	D2HDQ1	0.000	172.516	52	22	68	21	522	58.8	6.16	151.32	1	519456550.625	407758588.402552	210894900.820781	519456550.625	391311008.75	161612556.25
High	G1M8V0	0.000	172.490	71	16	58	16	356	38.1	7.20	183.41	0	963759154.75	342652198.977675	481215822.042632	963759154.75	328830787.25	368764340.9375
High	D2GXL3	0.000	172.306	39	13	91	13	544	58.8	4.36	229.34	0	1632149928	2164139260.38958	969994282.437786	1632149928	2076845322.5625	743324067.6875
High	G1M738	0.000	172.194	71	17	85	17	230	26.0	6.92	242.99	0	1127970940.75	1123561999.57577	824522406.041898	1127970940.75	1078241371.125	631846351.9375
High	G1LGV5	0.000	172.034	73	14	174	7	215	23.7	6.79	496.03	0	1854985635.5	1651765915.0262	1501220762.33913	1854985635.5	1585139356.5	1150412475.375
High	G1M9V1	0.000	171.741	15	38	70	1	3277	372.8	7.03	137.57	12	35276324.375	46454284.6405936	46675541.383204	35276324.375	44580478.5	35768307
High	D2GVE6	0.000	171.703	49	19	73	1	591	63.0	8.15	215.75	0	9790187			9790187
High	G1LHZ6	0.000	171.699	76	10	201	10	148	16.7	4.22	577.05	0	7044505426.03906	10901789111.7082	7785206129.68835	7044505426.03906	10462048417.4102	5965943503.875
High	G1LWF0	0.000	171.664	14	29	58	12	2370	257.6	8.54	131.56	0	22668361.75	28183099.6643296	76757454.2917179	22668361.75	27046290.3125	58820618
High	G1L4A3	0.000	171.661	50	15	109	14	438	50.8	8.51	318.82	0	755852916.375	845423173.916942	2445655929.50339	755852916.375	811321709.5	1874150133.25
High	G1LIU8	0.000	171.589	37	17	102	17	647	72.8	7.11	314.83	0	1650299945.25	1248555369.86512	398637075.624062	1650299945.25	1198192938.5625	305482762.0625
High	G1LJD1	0.000	171.530	26	35	68	26	1837	204.1	6.76	140.62	7	198968543.5	248383616.827857	187865482.70402	198968543.5	238364675.625	143964698.875
High	D2GV48	0.000	171.517	55	22	75	22	475	51.0	5.81	189.35	0	1024679493.5	598245757.569767	282913845.173789	1024679493.5	574114580.375	216801968.84375
High	G1M2J0	0.000	171.505	20	22	65	22	1012	117.5	10.24	173.56	0	378417556	404024511.32016	554695342.305478	378417556	387727551.5	425073019.125
High	D2H1M3	0.000	171.359	57	17	39	17	519	55.1	6.93	130.91	0	113675934.8125	147884376.698833	158879511.541947	113675934.8125	141919229.34375	121752227.75
[truncated: 9,436 more rows]

## Sheet: Protein quantification
Protein	Description	Gene	J8d	F18y	H22y
D2HU49	Uncharacterized protein	PANDA_015769	1.4205e+11	7.08374e+10	2.12645e+11
G1LEJ5	Uncharacterized protein	ALB	1.56389e+11	1.64449e+11	1.44796e+11
P18970	Hemoglobin subunit alpha	HBA	1.2166e+11	6.11731e+10	1.4314e+11
D2H496	Uncharacterized protein (Fragment)	ACTB	9.29102e+10	7.39762e+10	8.10512e+10
D2HVQ7	Heat shock protein 90 alpha family class A member 1 (Fragment)	HSP90AA1	3.27235e+10	6.40289e+10	6.43348e+10
G1LX08	Tubulin alpha chain	LOC100470688	4.54129e+10	6.99722e+10	5.87731e+10
G1MDU7	Heat shock protein family A (Hsp70) member 5	HSPA5	4.23624e+10	6.7043e+10	5.84722e+10
G1LJ40	HATPase_c domain-containing protein	HSP90B1	4.1365e+10	5.36341e+10	5.80422e+10
G1M785	Tubulin beta chain	TUBB2B	5.16525e+10	6.26684e+10	5.73157e+10
G1LVM5	Vimentin	VIM	9.41251e+10	6.34731e+10	5.41702e+10
D2HC77	Apolipoprotein A-I	APOA1	6.95857e+10	3.50462e+10	5.294e+10
G1M502	Aldedh domain-containing protein	ALDH2	2.87864e+10	4.92107e+10	5.07073e+10
D2GW48	Protein disulfide-isomerase (Fragment)	PDIA3	3.33924e+10	4.41609e+10	4.73238e+10
D2GYI3	Uncharacterized protein (Fragment)	HSPA2	1.85067e+09	4.27849e+10	4.63518e+10
G1LMH6	Elongation factor 1-alpha	EEF1A1	4.92964e+10	3.82307e+10	3.58626e+10
D2GYC0	Uncharacterized protein (Fragment)	HSPA8	3.42799e+10	4.18183e+10	3.56445e+10
G1LHJ8	Dynein cytoplasmic 1 heavy chain 1	DYNC1H1	2.17548e+10	2.91404e+10	3.28065e+10
D2I0Z3	Transket_pyr domain-containing protein (Fragment)	PANDA_018912	2.01945e+09	4.10385e+10	3.13379e+10
G1MCG0	Uncharacterized protein		2.14976e+10	2.76642e+10	3.09932e+10
G1L0E7	Uncharacterized protein		4.42677e+10	4.93476e+10	2.97664e+10
G1LEK1	Glutathione S-transferase	GSTM3	3.385e+09	2.68966e+10	2.9563e+10
G1LPA5	Ig-like domain-containing protein		1.1753e+10	1.8528e+10	2.95158e+10
G1LHS7	Pyruvate kinase	PKM	3.0046e+10	2.0637e+10	2.93133e+10
G1LB18	Uncharacterized protein	ENO1	3.79749e+10	1.96783e+10	2.89786e+10
G1M5B6	Heat shock protein family D (Hsp60) member 1	HSPD1	2.71309e+10	2.5428e+10	2.68891e+10
D2HWK1	Histone H4 (Fragment)	PANDA_016906	7.09485e+10	4.67309e+10	2.62019e+10
G1MD73	Tubulin beta chain	TUBB4B	1.28968e+10	2.11975e+10	2.61849e+10
G1L7D3	Heat shock protein family A (Hsp70) member 4 like	HSPA4L	3.25606e+09	2.42687e+10	2.6167e+10
D2HLF0	Uncharacterized protein (Fragment)	PANDA_012315	3.77009e+09	2.5102e+10	2.57751e+10
D2H363	ATP synthase subunit beta (Fragment)	ATP5F1B	2.30264e+10	2.44801e+10	2.5175e+10
G1LXP6	Inositol-3-phosphate synthase 1	ISYNA1	1.06064e+10	2.37823e+10	2.47124e+10
G1LNL2	Uncharacterized protein		5.89351e+09	1.59992e+10	2.44865e+10
G1LHD9	Heterogeneous nuclear ribonucleoprotein A2/B1	HNRNPA2B1	3.16934e+10	2.44647e+10	2.43304e+10
D2HWK3	Histone H2A (Fragment)	PANDA_016908	3.93732e+10	2.50291e+10	2.31829e+10
G1LNL1	14_3_3 domain-containing protein	YWHAE	2.09058e+10	2.23892e+10	2.28777e+10
D2HCA8	Uncharacterized protein (Fragment)	PANDA_008209	1.73165e+10	3.4597e+10	2.28093e+10
D2I1F1	L-lactate dehydrogenase (Fragment)	LDHB	2.07954e+10	1.91605e+10	2.26275e+10
G1L4Y3	Uncharacterized protein	FBN1	1.33681e+10	1.99019e+10	2.19792e+10
D2I331	Uncharacterized protein (Fragment)	PANDA_019876	4.69077e+09	2.38293e+10	2.17836e+10
G1LRB0	AdoHcyase_NAD domain-containing protein	AHCY	2.12426e+10	1.63698e+10	2.17009e+10
D6BQW4	Glyceraldehyde-3-phosphate dehydrogenase		2.53355e+10	1.6964e+10	2.08208e+10
D2H8J8	ATP synthase subunit alpha (Fragment)	PANDA_006569	1.90797e+10	2.08806e+10	2.07622e+10
G1LWG5	Malate dehydrogenase	MDH2	1.44642e+10	2.49614e+10	2.03176e+10
G1MAF6	Valosin containing protein	VCP	1.64811e+10	2.03068e+10	2.02378e+10
G1MGJ0	Protein disulfide-isomerase	P4HB	1.77875e+10	1.80663e+10	2.0207e+10
G1LCQ9	Spectrin beta chain	SPTBN1	2.95452e+10	1.91664e+10	2.00221e+10
D2GZ42	Uncharacterized protein (Fragment)	ACTA2	1.26282e+10	2.33695e+10	1.98074e+10
G1MB00	Uncharacterized protein	SPTAN1	2.74588e+10	2.25296e+10	1.97685e+10
D2I822	Uncharacterized protein (Fragment)	FLNA	5.36673e+10	2.75858e+10	1.97156e+10
G1M910	Superoxide dismutase [Cu-Zn]	SOD1	1.21354e+10	1.68114e+10	1.95219e+10
G1LYK1	Clathrin heavy chain	CLTC	1.89301e+10	1.95228e+10	1.94416e+10
G1LP52	Collagen type VI alpha 3 chain	COL6A3	9.34844e+10	4.14796e+10	1.91975e+10
G1L0F5	14_3_3 domain-containing protein	YWHAZ	1.41156e+10	1.90436e+10	1.91012e+10
G1LL53	Complement C3	C3	1.83384e+10	1.42428e+10	1.87205e+10
D2H1P3	Phosphoglycerate kinase (Fragment)	PGK2	7.65159e+09	1.63077e+10	1.8642e+10
G1M012	Uncharacterized protein	COL1A1	5.79846e+10	2.24988e+10	1.85077e+10
D2HC39	Thioredoxin domain-containing protein (Fragment)	PRDX1	2.41538e+10	1.73981e+10	1.81758e+10
G1L675	Haptoglobin		2.24559e+09	2.31656e+10	1.80288e+10
D2GXX0	Uncharacterized protein (Fragment)	CYP17A1	2.48425e+10	2.13244e+10	1.79992e+10
G1L5H8	Cathepsin D	CTSD	2.79022e+09	8.70965e+09	1.791e+10
G1LGH1	WD repeat domain 1	WDR1	1.38659e+10	1.85266e+10	1.77359e+10
D2H949	TIP120 domain-containing protein (Fragment)	PANDA_006823	7.7332e+09	1.71626e+10	1.69465e+10
G1MB13	Aconitase 2	ACO2	1.05985e+10	1.6149e+10	16622674278
G1M7L4	T-complex protein 1 subunit gamma	CCT3	8.96829e+09	1.80249e+10	1.64213e+10
G1MA93	T-complex 1	TCP1	9.85535e+09	1.59585e+10	1.64072e+10
G1MCH6	Aldo_ket_red domain-containing protein	AKR1B1	1.13482e+10	1.83524e+10	1.59255e+10
D2HS92	PDZ domain-containing protein (Fragment)	PANDA_014933	3.39209e+10	1.65322e+10	1.57051e+10
G1LJM2	Uncharacterized protein	EEF1G	8.56767e+09	1.36264e+10	1.56342e+10
G1LB35	Importin N-terminal domain-containing protein	IPO5	4.71631e+09	1.48416e+10	1.53852e+10
D2HJ05	Triosephosphate isomerase (Fragment)	TPI1	2.80335e+10	1.34819e+10	1.53791e+10
G1MGY6	Phosphoglycerate kinase	PGK1	2.11282e+10	1.39805e+10	1.50734e+10
G1LMU0	Transket_pyr domain-containing protein	TKT	2.26389e+10	9.85325e+09	1.47568e+10
D2HWI3	Histone H3 (Fragment)	PANDA_016834	2.5147e+10	1.94084e+10	1.46321e+10
D2HG17	Uncharacterized protein (Fragment)	CALR	8.57799e+09	1.56911e+10	1.4603e+10
G1M9L3	Fructose-bisphosphate aldolase		1.51125e+10	9.99815e+09	1.4325e+10
G1LU99	Histone H2B		2.30622e+10	6.09161e+09	1.42682e+10
G1LNI2	Uncharacterized protein	CCT8	8.96302e+09	1.51972e+10	1.41809e+10
G1LSI8	Myosin heavy chain 11	MYH11	5.68514e+09	2.58068e+10	1.41521e+10
G1LB91	Uncharacterized protein	HNRNPK	2.11225e+10	1.73054e+10	1.38866e+10
D2HRQ7	Glucose-6-phosphate isomerase (Fragment)	GPI	1.04893e+10	1.03882e+10	1.38274e+10
G1LJY9	Tubulin alpha chain	TUBA1B	1.73115e+10	1.19698e+10	1.3636e+10
D2H9W8	Uncharacterized protein (Fragment)	CCT5	7.56852e+09	1.4487e+10	1.35047e+10
D2HU89	L-lactate dehydrogenase (Fragment)	LDHC	5.14781e+09	9.94344e+09	13385571718
G1LIB6	Plectin	PLEC	1.37525e+10	1.07693e+10	1.33393e+10
D2I042	Tr-type G domain-containing protein (Fragment)	PANDA_018484	2.20246e+10	1.3681e+10	1.31923e+10
G1LEE5	Heterogeneous nuclear ribonucleoprotein M	HNRNPM	1.10626e+10	1.15891e+10	1.30705e+10
G1L4H8	Uncharacterized protein	VDAC2	7.78064e+09	1.17957e+10	1.29865e+10
G1MIB8	Stress induced phosphoprotein 1	STIP1	6.75969e+09	1.14565e+10	12819359725
G1M044	Uncharacterized protein	AKAP4	1.22411e+09	9.00304e+09	1.28152e+10
D2GZG2	Uncharacterized protein (Fragment)	MYH9	3.92977e+10	1.61848e+10	1.27682e+10
D2HEE4	Uncharacterized protein (Fragment)	PANDA_009166	1.10992e+10	1.30146e+10	1.27602e+10
D2HA21	DJ-1_PfpI domain-containing protein (Fragment)	PARK7	6.41391e+09	1.25156e+10	1.26614e+10
G1LT30	Talin 1	TLN1	1.97109e+10	1.23309e+10	1.26338e+10
G1MAN8	Peroxiredoxin 6	PRDX6	8.15174e+09	1.10868e+10	1.21919e+10
G1M9N6	Dolichyl-diphosphooligosaccharide--protein glycosyltransferase subunit 1	RPN1	1.18661e+10	1.51409e+10	1.21295e+10
G1LYL6	Protein disulfide isomerase family A member 6	PDIA6	1.12539e+10	1.44698e+10	1.21109e+10
D2HDI2	Uncharacterized protein (Fragment)	PANDA_008751	9.64205e+09	9.5227e+09	1.20209e+10
G1LEG7	Uncharacterized protein		5.9239e+09	1.06101e+10	1.19924e+10
G1LNP3	Annexin	ANXA6	2.38585e+10	1.29358e+10	1.19763e+10
G1MDU1	Heat shock protein family A (Hsp70) member 9	HSPA9	8.66339e+09	1.21478e+10	1.18003e+10
D2GYR4	Peptidyl-prolyl cis-trans isomerase (Fragment)	PPIB	1.58077e+10	1.37548e+10	1.16597e+10
D2H5L1	Phosphoglycerate mutase (Fragment)	PGAM1	1.80166e+10	1.28864e+10	1.16457e+10
G1LU92	Galectin	LGALS1	1.57889e+10	1.24294e+10	1.1418e+10
G1LZI4	Chaperonin containing TCP1 subunit 2	CCT2	7.21188e+09	1.58616e+10	1.11917e+10
G1MAN4	T-complex protein 1 subunit eta	CCT7	6.11465e+09	1.21177e+10	1.11207e+10
G1MCD1	Uncharacterized protein		5.30341e+09	1.24853e+10	1.10898e+10
G1MHN7	Pyrophosphatase (inorganic) 1	PPA1	2.25282e+09	9.97934e+09	1.10869e+10
D2I2U6	PNP_UDP_1 domain-containing protein (Fragment)	PANDA_019760	5.48258e+09	1.03343e+10	1.09836e+10
G1M6X1	Lamin A/C	LMNA	1.61317e+10	9.9272e+09	1.09509e+10
G1L0J4	Polyadenylate-binding protein		5.35335e+09	1.04921e+10	1.09211e+10
D2HGR2	Uncharacterized protein (Fragment)	PANDA_010232	1.42083e+10	1.21622e+10	1.06711e+10
G1LY16	Uncharacterized protein		8.08867e+09	1.31727e+10	1.0633e+10
G1LPU6	14_3_3 domain-containing protein	YWHAQ	5.24043e+09	6.91398e+09	1.05419e+10
G1MH03	Prosaposin	PSAP	2.17518e+09	6.89721e+09	1.03656e+10
D2H8H7	Iso_dh domain-containing protein (Fragment)	IDH1	5.91581e+09	8.91888e+09	1.03628e+10
D2H4P3	ADF-H domain-containing protein (Fragment)	PANDA_004783	1.83308e+10	1.15455e+10	1.02813e+10
G1LA28	T-complex protein 1 subunit delta	CCT4	5.30671e+09	1.01577e+10	1.02493e+10
G1MD31	Uncharacterized protein	NCL	1.4177e+10	1.09271e+10	1.02276e+10
G1MB69	Uncharacterized protein	HSD17B4	1.85954e+09	1.03097e+10	10063028292
D2H2Y2	PWWP domain-containing protein (Fragment)	PANDA_004016	3.33973e+09	1.33574e+10	9.75888e+09
D2I361	Uncharacterized protein (Fragment)	PANDA_019918	6.93238e+09	4.66853e+09	9.71322e+09
D2H547	Importin N-terminal domain-containing protein (Fragment)	PANDA_004988	6.93018e+09	9.28923e+09	9.70976e+09
D2GTZ2	Aspartate aminotransferase (Fragment)	PANDA_000063	5.45154e+09	1.15146e+10	9.69437e+09
G1M3M6	Ubiquitin like modifier activating enzyme 1	UBA1	1.06124e+10	8.07303e+09	9.68237e+09
G1MHP1	L-lactate dehydrogenase	LDHA	1.06877e+10	8.23401e+09	9.62412e+09
D2HGC3	Uncharacterized protein (Fragment)	HNRNPH1	1.68419e+10	1.05322e+10	9.52875e+09
G1LVR2	DEAD-box helicase 17	DDX17	1.31963e+10	1.06252e+10	9.50673e+09
D2HVN2	EHN domain-containing protein (Fragment)	EPHX1	1.43695e+09	1.2163e+10	9.47493e+09
D2HGU8	Uncharacterized protein (Fragment)	MAP1B	4.82832e+09	1.10188e+10	9.4041e+09
G1LA19	Alpha-1,4 glucan phosphorylase	PYGB	3.74592e+09	9.03781e+09	9.316e+09
D2H0K1	Uncharacterized protein (Fragment)	SPERT	1.42608e+08	5.45408e+09	9.27632e+09
G1M646	Calcium-transporting ATPase	ATP2A2	3.6747e+09	8.75064e+09	9.24075e+09
G1M077	Collagen IV NC1 domain-containing protein	COL4A5	2.4416e+09	1.24131e+10	9.19106e+09
G1L2C1	Uncharacterized protein	EIF4A2	7.58944e+09	9.66453e+09	9.18641e+09
D2HND4	Sacchrp_dh_NADP domain-containing protein (Fragment)	SCCPDH	1.40834e+09	7.44881e+09	9.16842e+09
G1LEH3	HECT, UBA and WWE domain containing E3 ubiquitin protein ligase 1	HUWE1	5.44503e+09	9.12376e+09	9.06046e+09
G1MEZ8	Miff domain-containing protein	FATE1	2.01911e+07	9.35007e+09	8.90005e+09
G1M0V1	Peroxiredoxin 2	PRDX2	1.15552e+10	7.39523e+09	8.78885e+09
G1LDV1	Peptidylprolyl isomerase	FKBP4	6.70077e+09	1.21653e+10	8.7679e+09
G1MHG2	Voltage dependent anion channel 1	VDAC1	1.13906e+10	9.13648e+09	8.65618e+09
G1L6E2	Uncharacterized protein	HADHA	9.48312e+09	6.39425e+09	8.65162e+09
D2HDG9	Uncharacterized protein (Fragment)	PANDA_008733	5.72691e+09	1.04314e+10	8.5736e+09
G1LZE2	HATPase_c domain-containing protein	HSP90AB1	9.95187e+09	8.54023e+09	8.55865e+09
G1M3F6	Microtubule-associated protein	MAP4	9.82632e+09	9.74349e+09	8.50835e+09
G1MDQ7	CPSF_A domain-containing protein	DDB1	4.91945e+09	1.04924e+10	8.4357e+09
D2HTG8	Uncharacterized protein (Fragment)	ACTN4	2.43157e+10	1.10606e+10	8400372761
G1LFQ4	Malate dehydrogenase	MDH1	6.73539e+09	8.92942e+09	8.2762e+09
G1L5G2	Rab GDP dissociation inhibitor	GDI2	8.20295e+09	7.05781e+09	8.25404e+09
D2HLA6	Fibrinogen C-terminal domain-containing protein (Fragment)	PANDA_012254	2.10809e+09	1.07211e+10	8.24708e+09
G1LRJ2	Heterogeneous nuclear ribonucleoprotein U	HNRNPU	1.6903e+10	1.28225e+10	8.20799e+09
G1M054	Alpha-mannosidase	MAN2B1	3.35531e+09	5.9227e+09	8151845057
G1LID2	SERPIN domain-containing protein		3.68005e+10	1.20055e+10	8.08318e+09
D2H8Q9	LRRNT domain-containing protein (Fragment)	PRELP	2.83458e+09	1.05546e+10	7.98374e+09
D2I061	Uncharacterized protein (Fragment)	PANDA_018508	1.08346e+10	1.31567e+10	7.98048e+09
D2HWM8	Uncharacterized protein (Fragment)	PIWIL1	3.31402e+08	6.91309e+09	7.92059e+09
G1LR67	Cholesterol side-chain cleavage enzyme, mitochondrial	CYP11A1	4.07304e+09	8.64069e+09	7.8504e+09
G1MFJ8	26S proteasome non-ATPase regulatory subunit 2	PSMD2	6.04873e+09	8.01065e+09	7.83189e+09
G1LWQ6	Uncharacterized protein	CLGN	1.20894e+08	8.25154e+09	7.79784e+09
D2GXF6	MGS domain-containing protein (Fragment)	PANDA_001578	5.44997e+09	5.0703e+09	7.76623e+09
D2I3B4	Uncharacterized protein (Fragment)	PANDA_019994	2.02804e+09	7.57565e+09	7.74796e+09
G1L9R5	Perilipin	PLIN3	4.97278e+09	5.33618e+09	7.73932e+09
D2HS94	Uncharacterized protein (Fragment)	PANDA_014935	6.18518e+08	4.70935e+09	7.72252e+09
G1LPI9	Succinate dehydrogenase [ubiquinone] flavoprotein subunit, mitochondrial		4.79943e+09	7.73517e+09	7.71211e+09
G1LEV4	Uncharacterized protein		9.74386e+09	8.65555e+09	7657481345
G1L1L9	Uncharacterized protein		1.33167e+10	5.58749e+09	7.59689e+09
G1L714	Carbonic anhydrase 3	CA3	2.03054e+08	6.12982e+09	7.56095e+09
D2H7C0	RuvB-like helicase (Fragment)	RUVBL1	4.58e+09	7.51379e+09	7.52504e+09
D2GUW1	Uncharacterized protein (Fragment)	HMGB2	5.97083e+09	8.36232e+09	7.51826e+09
D2I3Z5	Calponin-homology (CH) domain-containing protein (Fragment)	PANDA_020281	9.99184e+09	7.36517e+09	7.47586e+09
G1LZN8	Heterogeneous nuclear ribonucleoprotein A3	HNRNPA3	9.3255e+09	7.48674e+09	7.43891e+09
G1M2C8	Thioredoxin domain-containing protein	PRDX4	5.19399e+09	8.16608e+09	7.37743e+09
G1LQL3	Uncharacterized protein		9.09605e+09	7.64604e+09	7.32543e+09
G1M6R5	Alkaline phosphatase	ALPL	3.29992e+08	5.11983e+09	7.23249e+09
G1M782	Aldehyde dehydrogenase 1 family member A3	ALDH1A3	2.25942e+09	5.92852e+09	7.21984e+09
G1LXI8	Interleukin enhancer binding factor 3	ILF3	8.71149e+09	8.06889e+09	7.16649e+09
G1L7R2	Protein disulfide-isomerase A4	PDIA4	1.43747e+10	1.11388e+10	7.12595e+09
G1MKK0	Uncharacterized protein		7.23805e+09	7.6684e+09	7.08661e+09
G1MG00	Fatty acid synthase	FASN	4.55428e+09	5.21156e+09	7.08455e+09
D2HWC9	TPR_REGION domain-containing protein (Fragment)	ST13	5.46741e+09	8.17983e+09	7.06355e+09
G1M509	Nuclear autoantigenic sperm protein	NASP	5.03707e+09	6.57043e+09	7.04994e+09
G1LHZ6	Calmodulin 2	CALM2	7.78521e+09	1.09018e+10	7.04451e+09
D2GX06	Uncharacterized protein (Fragment)	PANDA_001387	1.94117e+10	7.40351e+09	7.02297e+09
G1MD79	Uncharacterized protein	HPX	2.88118e+09	5.36828e+09	7.01904e+09
G1LC30	GTP-binding nuclear protein Ran		6.74249e+09	8.52751e+09	6.94133e+09
G1LR07	NADPH:adrenodoxin oxidoreductase, mitochondrial	FDXR	6.3554e+09	5.38469e+09	6.91823e+09
G1L445	Collagen type VI alpha 2 chain	COL6A2	2.98777e+10	1.382e+10	6.9084e+09
G1LJ76	Gal_mutarotas_2 domain-containing protein	GANAB	7.00562e+09	7.54075e+09	6.8634e+09
G1LSF7	DExD-box helicase 39B	DDX39B	6.43994e+09	7.31202e+09	6.84233e+09
G1LQN3	Biglycan	BGN	6.17588e+09	9.51266e+09	6.82992e+09
D2GVI6	Uncharacterized protein (Fragment)	HSPA4	3.32477e+09	8.34657e+09	6.81986e+09
D2I4S0	Uncharacterized protein (Fragment)	PANDA_020620	6.93344e+07	2.09838e+08	6.78347e+09
G1LGZ5	ATP-citrate synthase	ACLY	3.44565e+09	7.32151e+09	6.77406e+09
G1L752	Uncharacterized protein	SLC25A31	2.7637e+09	6.89935e+09	6748682456
G1MAN2	Elongation factor Tu	TUFM	5.40743e+09	6.5939e+09	6.73326e+09
G1M6T5	Coatomer subunit alpha	COPA	7.87547e+09	6.83718e+09	6.73165e+09
G1LN32	Nucleoside diphosphate kinase	NME1-NME2	1.01956e+10	7.18712e+09	6700035926
G1MF88	KH type-2 domain-containing protein	RPS3	1.14392e+10	8.40762e+09	6.69114e+09
G1M4G0	Isocitrate dehydrogenase [NADP]	IDH2	7.08394e+09	6.15726e+09	6.68572e+09
F2X216	40S ribosomal protein S12	RPS12	7.06045e+09	5.93011e+09	6.66759e+09
G1LTZ2	Aldehyde dehydrogenase 7 family member A1	ALDH7A1	3.7059e+09	5.75014e+09	6.60406e+09
G1KZF6	WD_REPEATS_REGION domain-containing protein	RACK1	1.22994e+10	7.32819e+09	6.582e+09
G1M7J2	RuvB-like helicase	RUVBL2	3.31248e+09	7.31222e+09	6.57929e+09
G1LCL2	Xanthine dehydrogenase	XDH	1.26625e+09	4.24354e+09	6.55925e+09
G1MHG3	Peptidyl-prolyl cis-trans isomerase		5.93022e+09	4.90459e+09	6.50365e+09
G1MEG0	Aspartyl aminopeptidase	DNPEP	1.40691e+09	7.31018e+09	6.47944e+09
D2HU05	Uncharacterized protein (Fragment)	PANDA_015716	3.90462e+09	5.9289e+09	6.46879e+09
D2HYB5	Transket_pyr domain-containing protein (Fragment)	PANDA_017697	1.21345e+08	6.01043e+09	6.46786e+09
G1LW46	Uncharacterized protein	SLC25A3	5.27212e+09	5.9649e+09	6.45659e+09
D2HJG5	Uncharacterized protein (Fragment)	PRXL2A	1.44189e+09	5.87316e+09	6.41258e+09
G1LTG5	Alpha-L-fucosidase	FUCA1	3.16231e+08	8.18447e+09	6.40849e+09
D2HZW5	D-3-phosphoglycerate dehydrogenase (Fragment)	PHGDH	6.4052e+09	4.98676e+09	6.38979e+09
G1M4R4	Amino_oxidase domain-containing protein	IL4I1	1.08849e+09	2.6975e+09	6.37818e+09
D2I4R2	Moesin (Fragment)	MSN	1.03127e+10	5.37845e+09	6.31851e+09
G1LQL2	Calnexin	CANX	6.27433e+09	6.80321e+09	6.26716e+09
G1LES3	Voltage dependent anion channel 3	VDAC3	1.77129e+09	4.9233e+09	6.2034e+09
G1L2R9	DEAD-box helicase 1	DDX1	5.30935e+09	6.02619e+09	6.14637e+09
D2HHR4	Uncharacterized protein (Fragment)	NNT	5.44285e+09	4.96795e+09	6127301812
G1L1X3	Splicing factor proline and glutamine rich	SFPQ	7.78755e+09	8.52569e+09	6.09997e+09
G1M575	Chromosome segregation 1 like	CSE1L	3.46282e+09	6.3089e+09	6.08876e+09
G1LMQ6	Antioxidant 1 copper chaperone	ATOX1	1.76628e+09	5.79987e+09	5.98109e+09
G1LLH7	Pre-mRNA processing factor 19	PRPF19	3.19074e+09	2.63422e+09	5970600007
G1LGF0	Aspartate beta-hydroxylase	ASPH	2.00979e+09	8.58056e+08	5.96679e+09
G1M7I8	USO1 vesicle transport factor	USO1	2.58379e+09	5.30169e+09	5.9467e+09
G1MJI1	Fibrinogen C-terminal domain-containing protein	FGG	6.99845e+09	3.83113e+09	5.91129e+09
G1LZ91	RAN binding protein 1	RANBP1	1.93218e+09	4.58174e+09	5.90898e+09
D2HIP6	Uncharacterized protein (Fragment)	PANDA_011107	4.58048e+09	4.81357e+09	5.90368e+09
D2HJ17	Uncharacterized protein (Fragment)	ACRBP	4.88327e+07	5.60889e+09	5.89921e+09
G1LRZ3	Mesencephalic astrocyte derived neurotrophic factor	MANF	3.78863e+09	7.3001e+09	5.89828e+09
D2HHL1	Uncharacterized protein (Fragment)	MTCH2	1.30435e+09	5.97392e+09	5.88051e+09
D2H0E6	Uncharacterized protein (Fragment)	PANDA_002891	8.55434e+09	6.78999e+09	5.83847e+09
G1LLX4	Tripartite motif containing 28	TRIM28	4.18941e+09	6.6768e+09	5.82743e+09
G1LB84	Uncharacterized protein	NPM1	8.73476e+09	7.28506e+09	5.82144e+09
D2HEV8	Uncharacterized protein (Fragment)	PANDA_009358	3.46531e+09	9.12346e+09	5.78953e+09
G1LWC4	Nuclear distribution C, dynein complex regulator	NUDC	2.6905e+09	6.71783e+09	5.78239e+09
G1L2K2	Alpha 2-HS glycoprotein	AHSG	1.21146e+10	7.23287e+09	5.74845e+09
D2GU94	PPR_long domain-containing protein (Fragment)	PANDA_000195	3.57337e+09	6.02897e+09	5.74613e+09
G1LND0	Annexin	ANXA2	1.19984e+10	6.6712e+09	5.72111e+09
G1L2G5	Uncharacterized protein	HRG	1.04382e+09	4.69642e+09	5.70056e+09
G1LQK7	Uncharacterized protein	HMGB1	6.27698e+09	5.68553e+09	5.69358e+09
G1L094	Dihydropyrimidinase like 2	DPYSL2	1.19999e+10	5.73907e+09	5.68441e+09
G1LP08	Endoplasmic reticulum resident protein 29	ERP29	2.4907e+09	7.21358e+09	5.66411e+09
G1L612	Uncharacterized protein	COL14A1	2.85625e+10	1.14596e+10	5.64414e+09
G1LBC3	Uncharacterized protein		1.30933e+10	6.84229e+08	5.64097e+09
D2HXM0	Adenylyl cyclase-associated protein (Fragment)	CAP1	4.59067e+09	5.13867e+09	5.57166e+09
G1M2V2	Annexin	ANXA11	4.18125e+09	5.47594e+09	5.52961e+09
D2HWS6	Uncharacterized protein (Fragment)	ARF3	3.20536e+09	5.2866e+09	5.52054e+09
G1LNS0	AP complex subunit beta	AP1B1	3.15838e+09	4.75796e+09	5.51529e+09
G1LAN9	Aconitase 1	ACO1	3.16253e+09	7.38662e+09	5.51044e+09
G1LR17	Uncharacterized protein	SNRNP200	6.69341e+09	5.48756e+09	5.46496e+09
D2I7G9	Uncharacterized protein (Fragment)	HSPA1L	2.5254e+09	5.0672e+09	5.45292e+09
G1LYX2	Cullin 3	CUL3	1.28847e+09	4.42907e+09	5.43664e+09
G1M585	Macrophage migration inhibitory factor	MIF	5.45374e+09	4.17321e+09	5.43252e+09
G1M5Z6	Uncharacterized protein	DDX4	6.27931e+08	5.80517e+09	5.42308e+09
G1L1J0	Adenylyl cyclase-associated protein	CAP2	1.34039e+09	4.90213e+09	5.40523e+09
G1LAU6	Citrate synthase	CS	2.92634e+09	5.40596e+09	5.36336e+09
D2HSF8	Uncharacterized protein (Fragment)	PANDA_015013	8.95643e+08	5.01193e+09	5.34179e+09
G1MG26	Thioredoxin domain containing 5	TXNDC5	9.16419e+09	6.81964e+09	5.32528e+09
G1L6G2	Glutathione S-transferase		8.77715e+08	4.51275e+09	5.31915e+09
D2GXT5	Fibrinogen C-terminal domain-containing protein (Fragment)	PANDA_001740	6.15331e+09	3.80338e+09	5.31598e+09
G1ME45	Uncharacterized protein	PTBP2	2.08886e+09	5.50513e+09	5.29726e+09
D2HLW8	FERM domain-containing protein (Fragment)	EPB41L2	4.62309e+09	5.58536e+09	5.22933e+09
D2HC73	Transgelin (Fragment)	TAGLN	5.93549e+09	3.76062e+09	5.21733e+09
G1LQV9	40S ribosomal protein SA	RPSA	7.74899e+09	5.39968e+09	5.20338e+09
G1L5Z2	Sushi repeat containing protein X-linked 2	SRPX2	9.26596e+07	6.73644e+07	5.19278e+09
D2HVC4	Uncharacterized protein (Fragment)	PANDA_016310	2.92001e+09	5.57144e+09	5.17956e+09
D2GY69	Uncharacterized protein (Fragment)	PANDA_001915	4.71282e+09	5.14988e+09	5.14371e+09
G1L1M0	Uncharacterized protein	UQCRC1	3.30128e+09	5.64959e+09	5.08885e+09
G1L699	Uncharacterized protein	HADHB	4.22896e+09	3.71135e+09	5.08809e+09
G1LYD2	UPF1 RNA helicase and ATPase	UPF1	1.80028e+09	5.10437e+09	5.08341e+09
G1L3H1	Hypoxanthine phosphoribosyltransferase		3.69542e+09	4.77842e+09	5.06881e+09
D2H695	PHB domain-containing protein (Fragment)	PANDA_005478	1.44053e+09	4.76282e+09	5026070818
G1L8W3	Acrosin	ACR	1.22021e+08	3.89297e+09	5.01581e+09
D2HNF5	Uncharacterized protein (Fragment)	PANDA_013219	4.0433e+07	4.17944e+09	5.00034e+09
G1LZ57	NAD(P)(+)--arginine ADP-ribosyltransferase	ART3	3.99101e+07	3.93217e+09	4.97471e+09
G1M4C5	Isoleucyl-tRNA synthetase	IARS	3.26684e+09	4.99261e+09	4.91228e+09
E4W6Z3	Ribosomal protein S20		6.77372e+09	4.79044e+09	4.898e+09
G1L8B1	Ubiquitin protein ligase E3 component n-recognin 4	UBR4	2.72888e+09	4.82468e+09	4.897e+09
D2HUG1	Ferritin (Fragment)	PANDA_015907	3.22406e+08	6.34425e+09	4.84332e+09
D2H3S4	CYTOSOL_AP domain-containing protein (Fragment)	PANDA_004368	2.6767e+09	3.40251e+09	4810665766
G1MDJ2	Acyl-CoA dehydrogenase very long chain	ACADVL	2.02234e+09	4.30566e+09	4.80279e+09
G1LBP4	KASH domain-containing protein		7.21701e+09	5.25015e+09	4.79364e+09
D2HE42	Uncharacterized protein (Fragment)	PANDA_009032	6.05018e+09	4.05703e+09	4.7781e+09
G1MIX0	Aldedh domain-containing protein	ALDH6A1	3.07041e+09	4.15181e+09	4.76889e+09
D2I538	Uncharacterized protein (Fragment)	PANDA_020766	1.04069e+10	1.34777e+09	4.74361e+09
D2H8C5	MPN domain-containing protein (Fragment)	PRPF8	5.93652e+09	5.75937e+09	4.741e+09
D2HIT5	Uncharacterized protein (Fragment)	CAVIN1	1.78447e+09	3.94873e+09	4.73812e+09
D2H120	Dolichyl-diphosphooligosaccharide--protein glycosyltransferase subunit 2 (Fragment)	PANDA_003175	4.76455e+09	6.54746e+09	4.73338e+09
G1L8K6	NADH:ubiquinone oxidoreductase core subunit S1	NDUFS1	2.9646e+09	3.93785e+09	4.6798e+09
G1LEX1	Heterogeneous nuclear ribonucleoprotein D	HNRNPD	7.89838e+09	5.17277e+09	4.65258e+09
G1KZV4	Clusterin	CLU	3.77182e+09	4.90764e+09	4.63645e+09
G1LIT5	RRM domain-containing protein		8.80569e+09	5.27657e+09	4.62999e+09
G1L552	Elastin microfibril interfacer 1	EMILIN1	1.00838e+10	5.57974e+09	4.62904e+09
D2HG83	Acetyltransferase component of pyruvate dehydrogenase complex (Fragment)	DLAT	2.22789e+09	5.1333e+09	4.5999e+09
G1L1K1	Tripartite motif containing 36	TRIM36	2.46639e+08	3.14276e+09	4.59957e+09
G1MAE6	Superoxide dismutase		1.23143e+09	4.53937e+09	4593337994
G1MDR7	Y-box binding protein 2	YBX2	6.92098e+07	4.61468e+09	4.56731e+09
D2H3C0	Uncharacterized protein (Fragment)	PANDA_004178	1.06032e+09	6.28915e+09	4.56369e+09
G1LDP5	Staphylococcal nuclease domain-containing protein	SND1	4.0299e+09	6.06024e+09	4.56131e+09
D2HEM9	Serpin family A member 3 (Fragment)	SERPINA3	1.33298e+09	2.83382e+09	4.55877e+09
D2HA11	Uncharacterized protein (Fragment)	PANDA_007210	9.59826e+09	7.63053e+09	4.5584e+09
D2I1K5	Profilin (Fragment)	PANDA_019183	4.9719e+09	4.8209e+09	4.55568e+09
D2HEP4	Uncharacterized protein (Fragment)	PANDA_009281	4.62158e+09	4.70355e+09	4.55354e+09
D2I070	Small nuclear ribonucleoprotein Sm D2 (Fragment)	SNRPD2	4.20695e+09	5.40912e+09	4.54943e+09
G1L9V0	Exportin 1	XPO1	5.29486e+09	5.71084e+09	4.54665e+09
G1LEM2	Uncharacterized protein	LANCL1	1.12298e+09	2.51419e+09	4.54031e+09
D2HXL6	Peptidyl-prolyl cis-trans isomerase	PANDA_017389	4.24601e+09	4.28085e+09	4.52811e+09
G1LW88	Ubiquitin specific peptidase 7	USP7	2.02493e+09	4.64337e+09	4527551407
G1MH78	Fatty acid binding protein 3	FABP3	2.1943e+09	2.22356e+09	4.52638e+09
G1L021	Lysosomal associated membrane protein 2	LAMP2	1.50012e+09	4.75798e+09	4.50476e+09
G1M9S2	AAA domain-containing protein	PSMC2	3.18889e+09	3.94888e+09	4.50301e+09
G1L9M3	Peptidase_M24 domain-containing protein	PA2G4	4.68761e+09	4.76966e+09	4.50258e+09
D2I671	Aspartate aminotransferase (Fragment)	GOT1	2.23034e+09	3.24948e+09	4.48685e+09
G1LGJ8	Proteasome 26S subunit, non-ATPase 11	PSMD11	3.26631e+09	7.26918e+09	4.47099e+09
G1LS66	Acetyl-CoA acyltransferase 2	ACAA2	3.60235e+09	2.7063e+09	4.46834e+09
G1LN56	Catalase	CAT	5.69592e+09	2.1607e+09	4438839287
G1LDQ6	Proteasome subunit alpha type	PSMA5	3.20202e+09	3.57292e+09	4.43171e+09
D2H3T1	Uncharacterized protein (Fragment)	AAMDC	2.60917e+08	3.08847e+09	4428926874
G1LET9	GCN1 activator of EIF2AK4	GCN1	2.98805e+09	5.0821e+09	4.40175e+09
G1L0I3	Glyceraldehyde-3-phosphate dehydrogenase	GAPDHS	2.72323e+09	3.88196e+09	4.40035e+09
D2GWQ1	VPS35 retromer complex component (Fragment)	VPS35	2.94697e+09	4.77417e+09	4.39891e+09
G1L6B4	Laminin subunit gamma 1	LAMC1	3.81978e+09	7.38755e+09	4.38732e+09
D2HYA4	Uncharacterized protein (Fragment)	PANDA_017685	2.31395e+09	3.91587e+09	4.38665e+09
G1L7Z7	Multifunctional fusion protein	ALDH4A1	1.14765e+09	4.70253e+09	4377559161
D2HSI5	ETF domain-containing protein (Fragment)	PANDA_015044	3.65948e+09	3.36524e+09	4.37208e+09
D2GXT4	Fibrinogen C-terminal domain-containing protein (Fragment)	PANDA_001739	5.79878e+09	3.11226e+09	4.35614e+09
G1L850	Uncharacterized protein	DENND4C	5.21942e+08	5.40364e+08	4.3367e+09
G1L294	Gelsolin	GSN	4.96316e+09	4.89068e+09	4.32452e+09
G1L8P5	F-actin-capping protein subunit beta	CAPZB	4.74198e+09	3.31376e+09	4.32223e+09
G1LTU8	Eukaryotic translation initiation factor 3 subunit A	EIF3A	3.95315e+09	5.05401e+09	4.31974e+09
G1LTE0	UBIQUITIN_CONJUGAT_2 domain-containing protein		4.57774e+09	4.53723e+09	4.30667e+09
G1L6X6	Proteasome subunit alpha type	PSMA3	2.43396e+09	2.35117e+09	4.30595e+09
G1MDT9	High density lipoprotein binding protein	HDLBP	6.68978e+09	5.25179e+09	4.29999e+09
G1LAS5	Succinate--CoA ligase [ADP-forming] subunit beta, mitochondrial	SUCLA2	2.16088e+09	3.88598e+09	4.29039e+09
G1LLT4	Platelet-activating factor acetylhydrolase IB subunit alpha	PAFAH1B1	2.82885e+09	4.57043e+09	4.28608e+09
G1L518	NmrA domain-containing protein	NMRAL1	4.09284e+09	4.35313e+09	4.2647e+09
G1LTN3	ATP synthase subunit gamma	ATP5F1C	3.47678e+09	4.57566e+09	4.25381e+09
G1LH50	Aspartyl-tRNA synthetase	DARS	5.26306e+09	3.62726e+09	4.2462e+09
G1MIK9	Creatine kinase B	CKB	4.84796e+09	2.54775e+09	4.21923e+09
G1L844	Polypyrimidine tract binding protein 1	PTBP1	7.84893e+09	3.99272e+09	4.2192e+09
G1L717	Programmed cell death 6 interacting protein	PDCD6IP	2.8063e+09	4.58056e+09	4.21756e+09
D2HLQ6	Uncharacterized protein (Fragment)	PANDA_012445	6.31363e+09	5.88173e+09	4215916808
G1LKD3	KH-type splicing regulatory protein	KHSRP	5.48383e+09	3.86177e+09	4.20381e+09
G1M5U2	Dihydrolipoyl dehydrogenase	DLD	2.26733e+09	4.68889e+09	4.1984e+09
G1LM49	MSP domain-containing protein	VAPA	9.90806e+08	3.13289e+09	4.16167e+09
D2GV47	Uncharacterized protein (Fragment)	SUGP2	1.53085e+09	5.5311e+09	4.16026e+09
G1L0Z2	CSD_1 domain-containing protein		2.39828e+09	3.8359e+09	4.15642e+09
G1LKK0	Uncharacterized protein	RARS	2.88832e+09	3.50789e+09	4.15131e+09
G1M1F5	Isocitrate dehydrogenase [NAD] subunit, mitochondrial	IDH3A	2.55635e+09	3.16037e+09	4.14386e+09
D2GUN4	Uncharacterized protein (Fragment)	HARS	1.48217e+09	3.72993e+09	4.13235e+09
D2Y399	Eukaryotic translation initiation factor 1		5.03108e+08	1.16217e+09	4.12929e+09
G1LQR5	Uncharacterized protein		1.0279e+08	4.63622e+09	4.12318e+09
G1MAY6	SERPIN domain-containing protein	SERPINC1	3.10049e+09	4.54645e+09	4.1099e+09
G1L4F6	Uncharacterized protein		1.82336e+10	9.34935e+09	4.10495e+09
D2I7C5	Elongation factor 1-alpha (Fragment)	PANDA_021816	4.21815e+09	4.16012e+09	4.09974e+09
G1LVI9	Protein kinase C substrate 80K-H	PRKCSH	1.78951e+09	3.51853e+09	4.09474e+09
D2HB31	FZ domain-containing protein (Fragment)	PANDA_007700	2.4625e+09	4.19531e+09	4.08466e+09
G1MEP7	SUMO-activating enzyme subunit 2	UBA2	1.69933e+09	4.40942e+09	4.07712e+09
G1LEB0	RAB11B, member RAS oncogene family	RAB11B	2.03777e+09	4.70585e+09	4.03649e+09
G1MCK8	Uncharacterized protein	ASS1	3.22673e+09	3.36078e+09	4.03084e+09
G1M967	Phosphoglucomutase 1	PGM1	2.22804e+09	1.92681e+09	4028859778
G1ML10	Ferritin		9.64391e+07	5.44272e+09	4.02567e+09
D2I3N9	Uncharacterized protein (Fragment)	PANDA_020151	3.4043e+09	5.10132e+09	4.02007e+09
G1L659	Uncharacterized protein	DHX9	3.34067e+09	4.75529e+09	4.01938e+09
D2GVD1	Cytochrome c domain-containing protein (Fragment)	CYCS	1.90757e+09	2.76472e+09	4.0185e+09
G1LTZ8	Thioredoxin domain-containing protein	PRDX3	4.50542e+09	3.18728e+09	4.0138e+09
D2HXZ7	Osteoglycin (Fragment)	OGN	1.63949e+10	5.91575e+09	4.01062e+09
D2GWV2	USP domain-containing protein (Fragment)	PANDA_001324	1.92596e+09	4.70147e+09	3.99023e+09
G1MIM1	Lectin, mannose binding 2	LMAN2	1.99316e+09	3.20822e+09	3.98963e+09
D2GXF5	Uncharacterized protein (Fragment)	FN1	1.89102e+10	4.78109e+09	3.97554e+09
G1M925	Golgin B1	GOLGB1	2.69112e+09	3.13909e+09	3.92569e+09
D2HYG7	Coatomer subunit delta (Fragment)	ARCN1	2.89865e+09	3.59531e+09	3.92185e+09
D2HHB0	Uncharacterized protein (Fragment)	RTCB	3.37244e+09	4.50641e+09	3.90264e+09
G1LIR3	GST C-terminal domain-containing protein	VARS	3.1087e+09	3.45653e+09	3901992070
G1M611	Fumarate hydratase	FH	1.99757e+09	3.21338e+09	3.8954e+09
G1LW45	Mannose receptor C-type 1	MRC1	2.81838e+09	3.47159e+09	3.8843e+09
G1LBG7	Ubiquitin-like domain-containing protein	RPS27A	8.01748e+09	6.30249e+09	3.87913e+09
D2HZI0	Uncharacterized protein (Fragment)	NID1	3.78146e+09	4.7105e+09	3.87098e+09
G1LGU0	40S ribosomal protein S4	RPS4X	1.18939e+10	6.8656e+09	3.85303e+09
G1LWA0	Pyruvate carboxylase	PC	2.26385e+09	2.8497e+09	3848955394
G1LAX6	Angiotensin-converting enzyme	ACE	4.32576e+08	3.08145e+09	3.84659e+09
G1L741	Uncharacterized protein	GMPS	2.89284e+09	4.19721e+09	3.84008e+09
G1LZF5	Uncharacterized protein	APOH	4.54852e+09	2.95817e+09	3.83619e+09
G8A3I2	Heat shock protein beta-1	HSPB1	1.32904e+10	3.98348e+09	3.82259e+09
D2H6F1	Uncharacterized protein (Fragment)	HNRNPF	3.71099e+09	4.63599e+09	3.81867e+09
G1MG56	Uncharacterized protein	RNF17	2.14608e+08	3.94747e+09	3.81545e+09
G1LWF3	ATP-dependent 6-phosphofructokinase	PFKL	3.50612e+09	2.59515e+09	3.81195e+09
G1LDV3	Lysosomal associated membrane protein 1	LAMP1	1.75078e+09	4.21753e+09	3.81155e+09
D2HQF6	Uncharacterized protein (Fragment)	PANDA_014128	2.89151e+09	3.36863e+09	3.80065e+09
D2H3S2	Quinoid dihydropteridine reductase (Fragment)	QDPR	1.15516e+09	3.21268e+09	3791841774
D2HPV1	Eukaryotic translation initiation factor 5A (Fragment)	PANDA_013848	3.80459e+09	4.23105e+09	3.78932e+09
G1MBY5	Serine/threonine-protein phosphatase 2A activator	PTPA	1.12612e+09	2.77215e+09	3.77639e+09
G1M7Y9	LRRNT domain-containing protein	LUM	1.33502e+10	5.52596e+09	3.75632e+09
G1LL39	Guanine deaminase	GDA	2.96603e+08	2.45165e+09	3.73023e+09
D2HS50	Insulin like growth factor 2 receptor (Fragment)	IGF2R	3.85767e+09	2.56623e+09	3.72154e+09
D2HHJ2	Uncharacterized protein (Fragment)	PANDA_010585	2.21367e+09	3.76109e+09	3.70037e+09
G1LF38	AAA domain-containing protein	PSMC6	3.22692e+09	3.22266e+09	3.68766e+09
D2I726	Uncharacterized protein	PANDA_021683	6.3009e+09	3.84592e+09	3.68268e+09
G1LPZ7	ELAV-like protein	ELAVL1	3.11879e+09	4.60069e+09	3.67388e+09
G1L613	Splicing factor 3b subunit 3	SF3B3	4.94334e+09	3.84784e+09	3667222146
G1M1A3	Biliverdin reductase B	BLVRB	1.81519e+09	1.14141e+09	3.66662e+09
G1MB99	Synaptotagmin binding cytoplasmic RNA interacting protein	SYNCRIP	7.87579e+09	4.09016e+09	3.6555e+09
G1LHM6	GC vitamin D binding protein	GC	1.42828e+09	4.18676e+09	3.65029e+09
G1L7I9	DEAD-box helicase 5	DDX5	3.70701e+09	4.27999e+09	3.63995e+09
G1MBX3	Uncharacterized protein	PLG	4.16265e+09	2.94949e+09	3.62836e+09
G1MG01	CAP-Gly domain-containing protein	DCTN1	2.28351e+09	3.22437e+09	3.6245e+09
G1L0Y2	Protein kinase cAMP-dependent type II regulatory subunit alpha	PRKAR2A	1.70965e+09	3.30804e+09	3.61273e+09
D2HI64	KH domain-containing protein (Fragment)	KHDRBS1	3.41953e+09	3.89233e+09	3.59879e+09
D2H814	Uncharacterized protein (Fragment)	EHD2	1.09875e+09	2.98407e+09	3.58159e+09
D2HAS3	Uncharacterized protein (Fragment)	PANDA_007564	1.37021e+09	1.79827e+09	3.58001e+09
G1LUS6	Uncharacterized protein	PPP2R1A	3.09724e+09	3.04871e+09	3.5786e+09
D2GZQ8	Uncharacterized protein (Fragment)	PANDA_002594	9.0478e+08	2.22867e+09	3.5764e+09
G1L081	Rab GDP dissociation inhibitor	GDI1	3.71776e+09	3.41926e+09	3562230800
D2HGK1	Cytochrome b5 heme-binding domain-containing protein (Fragment)	CYB5A	6.89915e+09	2.97553e+09	3.55738e+09
G1MAG9	Eukaryotic translation initiation factor 3 subunit C	LOC100480630	2.54973e+09	3.18833e+09	3.54315e+09
G1LHJ1	Cytochrome c1	CYC1	1.83246e+09	3.11673e+09	3.53923e+09
D2HJQ6	Uncharacterized protein (Fragment)	PANDA_011556	3.64842e+09	4.21756e+09	3.53511e+09
G1MHY5	Peroxiredoxin	PRDX5	4.90465e+09	3.93796e+09	3.52855e+09
G1LU75	Lamin B1	LMNB1	1.89915e+10	3.78409e+09	3.52275e+09
G1LKB6	Transaldolase	TALDO1	4.59796e+09	3.86644e+09	3.50982e+09
D2HCF9	Trifunctional purine biosynthetic protein adenosine-3 (Fragment)	PANDA_008270	4.05569e+09	3.77212e+09	3.50929e+09
G1LJW1	DEAD-box helicase 3 X-linked	DDX3X	3.55305e+09	3.35218e+09	3.50615e+09
G1LIP1	B30.2/SPRY domain-containing protein	HNRNPUL2	5.04101e+09	4.12087e+09	3.49488e+09
G1MGS5	WD_REPEATS_REGION domain-containing protein	EDC4	1.00134e+09	2.1652e+09	3.4887e+09
G1LXY8	Clathrin heavy chain	CLTCL1	3.68111e+08	4.19163e+09	3.48618e+09
D2I4E9	SERPIN domain-containing protein (Fragment)	PANDA_020462	1.25008e+09	4.0803e+09	3.48361e+09
G1LBU7	Uncharacterized protein	TOMM34	2.41384e+08	1.85327e+09	3.4598e+09
D2HRT2	Proteasome subunit beta (Fragment)	PSMB1	2.28526e+09	3.44539e+09	3.44994e+09
G1LFQ9	Uncharacterized protein	ATP5PB	2.20489e+09	3.12629e+09	3.44907e+09
G1LE28	DnaJ heat shock protein family (Hsp40) member A2	DNAJA2	8.98709e+08	2.51841e+09	3.4393e+09
G1MFH6	Uncharacterized protein	RAB1B	1.91635e+09	2.25769e+09	3.43206e+09
F2X201	40S ribosomal protein S3a	RPS3A	8.55918e+09	4.41982e+09	3.40922e+09
G1L9J9	DAZ associated protein 1	DAZAP1	1.07778e+09	4.36759e+09	3.38551e+09
D2HBI3	Adenosylhomocysteinase (Fragment)	PANDA_007886	2.51813e+09	3.08394e+09	3.38538e+09
G1LH91	MICOS complex subunit MIC60	IMMT	1.89152e+09	3.1981e+09	3.38535e+09
D2H9A9	Uncharacterized protein (Fragment)	CANT1	1.00194e+08	4.25638e+08	3.37688e+09
D2HTW4	Proteasome subunit beta (Fragment)	PSMB5	2.20505e+09	2.92792e+09	3.37403e+09
D2HDI4	SF3b1 domain-containing protein (Fragment)	PANDA_008755	3.5543e+09	3.4273e+09	3.37383e+09
G1LEL0	Dynactin subunit 2	DCTN2	2.3873e+09	2.82721e+09	3.36732e+09
G1MHD9	Histidine triad nucleotide binding protein 1	HINT1	1.68617e+09	3.29958e+09	3.36244e+09
G1LEQ8	SEC31 homolog A, COPII coat complex component	SEC31A	4.28793e+09	3.26904e+09	3361793546
D2HJ06	Ubiquitin carboxyl-terminal hydrolase (Fragment)	PANDA_011248	2.21463e+09	2.6332e+09	3.36094e+09
G1MCA5	Proteasome subunit beta	PSMB6	1.69081e+09	2.94689e+09	3.35805e+09
D2HJV9	Pribosyltran_N domain-containing protein (Fragment)	PRPS1	9.71785e+08	3.50281e+09	3.35732e+09
D2HVM4	Poly [ADP-ribose] polymerase (Fragment)	PARP1	4.25381e+09	4.50896e+09	3.3444e+09
G1LSK4	NADH-cytochrome b5 reductase	CYB5R3	3.55532e+09	4.06445e+09	3.33447e+09
G1L1P7	Serine/threonine-protein phosphatase	PPP1CA	3.00142e+09	3.26383e+09	3319637245
G1MI56	CTD domain-containing protein	SRRM2	2.7597e+09	3.43568e+09	3317591573
G1L8T5	AAA domain-containing protein	PSMC5	2.81187e+09	3.25919e+09	3.29873e+09
G1LAP1	Rhophilin associated tail protein 1 like	ROPN1L	5.93111e+07	3.28249e+09	3.28918e+09
D2I084	H15 domain-containing protein (Fragment)	PANDA_018543	1.33195e+10	8.43852e+09	3.28693e+09
F2X246	Ribosomal protein L12	Rpl12	6.71765e+09	4.19081e+09	3.27161e+09
F2X229	60S acidic ribosomal protein P0	RPLP0	5.92081e+09	3.04235e+09	3.26288e+09
G1LEW1	Sodium/potassium-transporting ATPase subunit alpha	ATP1A1	4.92504e+09	2.91526e+09	3.25483e+09
D2I087	H15 domain-containing protein (Fragment)	PANDA_018546	1.26255e+10	8.82431e+09	3.25402e+09
G1LVD8	Ribonuclease/angiogenin inhibitor 1	RNH1	2.5638e+09	3.15272e+09	3.24801e+09
D2I2A2	Vacuolar proton pump subunit B (Fragment)	PANDA_019499	1.26744e+09	2.59582e+09	3.23426e+09
G1M7X2	Nucleobindin 1	NUCB1	8.76002e+08	3.6971e+09	3.23362e+09
G1MEB0	Pyruvate dehydrogenase E1 component subunit alpha	PDHA1	1.23147e+09	3.20263e+09	3.22746e+09
G1MGM4	Phosphoglycerate mutase	PGAM2	3.2515e+08	1.29253e+09	3.22413e+09
G1LVE7	Uncharacterized protein		3.13202e+09	3.15849e+09	3.22322e+09
D2HZ43	Dolichyl-diphosphooligosaccharide--protein glycosyltransferase 48 kDa subunit (Fragment)	PANDA_018057	5.16301e+09	4.64183e+09	3.21624e+09
D2HMA6	ATPase H+ transporting V1 subunit A (Fragment)	ATP6V1A	1.39756e+09	3.32032e+09	3.21563e+09
G1MHH5	Uncharacterized protein	ACTR1A	1.07831e+09	2.415e+09	3.21187e+09
G1LE07	AA_TRNA_LIGASE_II_ALA domain-containing protein	AARS	2.9397e+09	3.17642e+09	3.20886e+09
D2H7U8	Methyltransf_25 domain-containing protein (Fragment)	PANDA_006261	3.64861e+09	3.92965e+09	3.19253e+09
D2HYM1	ETF domain-containing protein (Fragment)	PANDA_017839	3.42795e+09	3.2016e+09	3.1817e+09
G1LQU1	Protein disulfide isomerase like, testis expressed	PDILT	2.85172e+08	2.80301e+09	3.18085e+09
D2HXH4	Uncharacterized protein (Fragment)	PANDA_017338	7.06081e+09	3.25521e+09	3.17837e+09
D2HHK5	AAA domain-containing protein (Fragment)	PANDA_010598	2.08916e+09	3.09362e+09	3.17142e+09
G1L8L1	DBC1 domain-containing protein	CCAR2	3.42309e+09	2.74684e+09	3.17059e+09
G1LBW8	Prostaglandin E synthase 3	PTGES3	2.96914e+09	4.80794e+09	3.17005e+09
G1M128	Lon protease homolog, mitochondrial	LONP1	2.32599e+09	2.33963e+09	3.16532e+09
D2H7Y0	Dihydrodiol dehydrogenase (Fragment)	DHDH	2.50822e+08	3.11607e+09	3.16079e+09
G1MFU2	Dimethylarginine dimethylaminohydrolase 1	DDAH1	1.20058e+09	2.56834e+09	3.13806e+09
G1MAV4	Proteasome subunit alpha type	PSMA6	3.04526e+09	3.23468e+09	3.13394e+09
G1M8T5	Uncharacterized protein	AIFM1	3.67428e+08	2.29313e+09	3.1225e+09
D2HD33	Uncharacterized protein (Fragment)	ATP5PD	1.93852e+09	2.12353e+09	3.11984e+09
G1LVF8	SH3 domain-binding glutamic acid-rich-like protein	SH3BGRL3	3.83701e+09	2.80457e+09	3.0967e+09
D2H536	Uncharacterized protein (Fragment)	LASP1	4.72691e+09	2.18394e+09	3.09202e+09
G1LA86	Serine/threonine kinase receptor associated protein	STRAP	1.95593e+09	2.78303e+09	3.0763e+09
G1M6C1	Sperm equatorial segment protein 1	SPESP1	2.93137e+06	1.78387e+09	3.05628e+09
D2HBJ3	Leukotriene A(4) hydrolase (Fragment)	LTA4H	3.38288e+09	3.15478e+09	3.05245e+09
D2H546	Aminopeptidase (Fragment)	NPEPPS	3.73702e+09	2.94519e+09	3.05156e+09
D2HT12	Uncharacterized protein (Fragment)	PSPC1	1.75565e+09	3.19779e+09	3.04965e+09
D2HEV2	Uncharacterized protein (Fragment)	RHOA	3.42048e+09	2.69691e+09	3.04212e+09
G1M769	Biphenyl hydrolase like	BPHL	1.03343e+09	5.52023e+08	3.04001e+09
G1L8T4	Lactoylglutathione lyase	GLO1	2.45408e+09	1.60641e+09	3.0387e+09
G1MJG9	Host cell factor C1	HCFC1	1.66768e+09	1.16212e+09	3.03529e+09
G1L799	Uncharacterized protein		4.96114e+09	3.42293e+09	3.02846e+09
F2X266	Ribosomal protein L23A	Rpl23A	4.52582e+09	3.62703e+09	3.02171e+09
G1M424	S-formylglutathione hydrolase	ESD	1.80834e+09	2.23294e+09	3.01815e+09
G1LEI1	PCI domain-containing protein	COPS4	1.29584e+09	3.29752e+09	3.00782e+09
G1L9E1	Tensin 1	TNS1	2.26483e+09	2.87656e+09	3.00684e+09
G1MIN3	W2 domain-containing protein	EIF5	1.33105e+09	2.57663e+09	2.99605e+09
G1MB17	Pentaxin	APCS	2.06102e+09	1.35436e+09	2.99535e+09
G1L6T1	Proteasome subunit alpha type	PSMA1	2.32004e+09	3.26383e+09	2.99446e+09
G1L0H2	NSFL1 cofactor	NSFL1C	1.28363e+09	2.39403e+09	2.99011e+09
D2I7H6	Uncharacterized protein (Fragment)	PANDA_021881	5.13753e+09	4.0491e+08	2.98731e+09
G1L9E3	ATP-dependent 6-phosphofructokinase	PFKP	1.6834e+09	3.4666e+09	2.98411e+09
G1M5C2	AP-2 complex subunit alpha	AP2A1	3.8151e+09	3.23463e+09	2.97897e+09
G1L9W6	UBA_e1_C domain-containing protein	UBA6	1.59806e+09	2.87329e+09	2.9728e+09
G1L538	Proteasome 26S subunit, ATPase 1	PSMC1	1.51422e+09	2.70188e+09	2.97097e+09
G1LDB6	Uncharacterized protein	RPS14	5.40656e+09	4.06305e+09	2.97092e+09
G1L3F3	Inositol 1,4,5-trisphosphate receptor type 3	ITPR3	1.25445e+09	2.91534e+09	2.96972e+09
G1L2L0	NADH dehydrogenase [ubiquinone] flavoprotein 1, mitochondrial	NDUFV1	1.37035e+09	2.47272e+09	2.95569e+09
G1M029	Pyruvate dehydrogenase E1 component subunit beta	PDHB	9.92628e+08	2.80082e+09	2.94965e+09
G1ME72	Myosin VI	MYO6	1.81195e+09	2.98992e+09	2.94928e+09
G1LJD7	Uncharacterized protein	GARS	2.2783e+09	3.56063e+09	2.93886e+09
G1LDK5	Uncharacterized protein	LRP1	6.09597e+09	2.76545e+09	2.93349e+09
D2HY20	Lysine--tRNA ligase (Fragment)	KARS	2.32453e+09	2.98844e+09	2.9225e+09
G1L947	Enoyl-CoA hydratase, short chain 1	ECHS1	1.71969e+09	2.91858e+09	2.91283e+09
D2GZH1	Sulfurtransferase (Fragment)	TST	2.33528e+09	2.80589e+09	2.90363e+09
D2HEJ5	Uncharacterized protein (Fragment)	AKAP3	1.95833e+08	2.23718e+09	2.9028e+09
G1LNZ3	Glyoxalase domain containing 4	GLOD4	3.48026e+09	1.92745e+09	2.89588e+09
G1LHG8	B5 domain-containing protein	FARSB	1.4382e+09	2.55602e+09	2.89517e+09
D2HUM0	Mitogen-activated protein kinase (Fragment)	MAPK1	2.06932e+09	2.82358e+09	2.89005e+09
D2H478	Uncharacterized protein (Fragment)	ACTL7B	4.68775e+07	2.17832e+09	2889438088
G1MDQ2	Tripeptidyl peptidase 2	TPP2	1.59172e+09	3.29578e+09	2.887e+09
G1LI64	Peptidase S1 domain-containing protein		3.48005e+09	2.98675e+09	2885668567
G1LYP7	Polyadenylate-binding protein	PABPC4	2.12551e+09	2.62922e+09	2.88165e+09
G1MHF6	EH domain containing 1	EHD1	1.67376e+09	2.82049e+09	2.87588e+09
D2H3X0	Uncharacterized protein (Fragment)	PANDA_004424	1.02225e+09	1.97715e+09	2.87515e+09
G1LGH6	Coatomer subunit beta	COPB2	4.37803e+09	3.11166e+09	2.862e+09
G1LNH8	Transthyretin	TTR	8.42061e+08	3.23194e+09	2.85911e+09
G1L6M9	Coatomer subunit beta	COPB1	3.94531e+09	2.66908e+09	2.85738e+09
G1MCV4	Tripeptidyl peptidase 1	TPP1	9.24484e+08	9.41948e+08	2.85364e+09
G1KZY6	Uncharacterized protein		1.54433e+09	3.70447e+09	2.84996e+09
G1L1G7	Selenium binding protein 1	SELENBP1	4.35796e+08	1.49403e+09	2.84728e+09
D2I2A9	40S ribosomal protein S7 (Fragment)	RPS7	2.3371e+09	3.19072e+09	2.83717e+09
G1MEI9	Desmin	DES	6.10304e+09	7.81014e+09	2.83506e+09
D2I573	CSP domain-containing protein	PANDA_020808	3.57368e+08	2.7997e+09	2.83358e+09
D2HBG8	AA_TRNA_LIGASE_II domain-containing protein (Fragment)	PANDA_007865	2.36904e+09	2.27215e+09	2.83262e+09
D2H344	Uncharacterized protein (Fragment)	PANDA_004078	3.63338e+09	2.86487e+09	2.82941e+09
G1M0A5	Cysteine and glycine rich protein 1	CSRP1	2.20945e+09	3.56475e+09	2.82204e+09
D2HL44	ThiF domain-containing protein (Fragment)	SAE1	1.56356e+09	2.46584e+09	2.82009e+09
F2X1Z8	Ribosomal protein S2	RPS2	4.69936e+09	5.10393e+09	2.80512e+09
G1LS60	Alpha-galactosidase	NAGA	9.32339e+08	2.05557e+09	2.80274e+09
G1LQ55	B cell receptor associated protein 31	BCAP31	8.20041e+08	2.34124e+09	2.79812e+09
G1MJ39	Transmembrane p24 trafficking protein 10	TMED10	2.1704e+09	3.15556e+09	2.79049e+09
D2HT18	Amidohydro-rel domain-containing protein (Fragment)	PANDA_015257	1.14078e+10	3.55037e+09	2.79024e+09
G1LZT6	IF rod domain-containing protein		1.96522e+10	1.28552e+09	2.78488e+09
G1L8B4	Four and a half LIM domains 1	FHL1	1.59804e+09	1.72577e+09	2.77995e+09
G1LG83	Uncharacterized protein		4.67272e+09	3.184e+09	2.76918e+09
G1M4T7	Pericentriolar material 1	PCM1	1.02258e+09	2.5144e+09	2.76818e+09
G1MAK7	Outer dense fiber of sperm tails 2	ODF2	2.20122e+08	2.71221e+09	2.75352e+09
G1LEJ1	Uncharacterized protein	HSD17B10	3.40198e+09	3.66945e+09	2.74325e+09
D2H110	TGc domain-containing protein (Fragment)	PANDA_003165	3.10893e+09	4.21626e+09	2.73933e+09
D2HRU8	60S ribosomal protein L6 (Fragment)	RPL6	4.53951e+09	5.20421e+09	2.73538e+09
G1LE20	Fructose-bisphosphate aldolase	ALDOC	1.54989e+09	1.17023e+09	2.73468e+09
G1LJK1	6-phosphogluconate dehydrogenase, decarboxylating	PGD	2.01792e+09	2.76005e+09	2.72974e+09
G1LB74	Uncharacterized protein	MTHFD1	5.17417e+09	2.35456e+09	2.71792e+09
G1MBN4	OPA1 mitochondrial dynamin like GTPase	OPA1	1.33992e+09	2.98034e+09	2.71621e+09
G1M3U3	Eukaryotic translation initiation factor 5B	EIF5B	1.24842e+09	1.01573e+09	2.71185e+09
B7SBG1	Ribosomal protein S19	RPS19	6.08532e+09	3.35503e+09	2.70815e+09
G1LRG2	Radixin	RDX	3.15093e+09	2.42446e+09	2.69244e+09
D2H1Q0	PCI domain-containing protein (Fragment)	PANDA_003474	1.85347e+09	2.39445e+09	2.69166e+09
G1MC12	Serine and arginine rich splicing factor 7	SRSF7	3.39539e+09	2.49949e+09	2.69064e+09
G1L008	Vesicle amine transport 1	VAT1	1.58854e+09	2.55504e+09	2.68811e+09
G1L5D4	Succinate--CoA ligase [ADP/GDP-forming] subunit alpha, mitochondrial	SUCLG1	1.35486e+09	1.58012e+09	2.68318e+09
G1LC83	Protein phosphatase 2 scaffold subunit Abeta	PPP2R1B	1.12078e+09	2.6382e+09	2.68091e+09
G1M0N1	FMR1 autosomal homolog 1	FXR1	1.15235e+09	2.39471e+09	2.67576e+09
G1LUW8	Kinesin-like protein	KIF5B	2.31575e+09	4.60904e+09	2.67057e+09
G1LS51	Uncharacterized protein	PPP1R2	1.43764e+08	1.22694e+09	2.66953e+09
G1LM91	NADH:ubiquinone oxidoreductase core subunit S3	NDUFS3	1.01435e+09	2.4554e+09	2.66698e+09
G1M241	Tr-type G domain-containing protein	EIF2S3	2.35527e+09	3.58794e+09	2.66687e+09
G1MDC4	26S proteasome non-ATPase regulatory subunit 1	PSMD1	2.68363e+09	2.74879e+09	2.66657e+09
G1M3G9	Tubulin beta chain	TUBB	5.95546e+09	4.25399e+09	2.66528e+09
G1L8K5	Aldo-keto reductase family 7 member A2	AKR7A2	2.17992e+09	1.52692e+09	2.66339e+09
D2I1W0	Uncharacterized protein (Fragment)	PANDA_019318	1.23454e+09	1.88342e+09	2.66238e+09
G1LJF6	Aldedh domain-containing protein		2.02507e+09	2.03734e+09	2.65344e+09
D2GWC0	Uncharacterized protein (Fragment)	PANDA_001090	5.18861e+09	5.12002e+09	2.64639e+09
G1LZL8	BIG2 domain-containing protein	NUP210L	8.50888e+08	2.77257e+09	2641851559
G1L6J5	Uncharacterized protein	MYH10	1.25225e+10	4.29111e+09	2.6418e+09
G1L3I1	Golgi glycoprotein 1	GLG1	3.21507e+09	3.04675e+09	2.63962e+09
G1M3N9	Uncharacterized protein	MAPRE1	1.18812e+09	2.38124e+09	2635768064
G1M216	Proteasome subunit alpha type	PSMA4	2.0171e+09	2.38079e+09	2.62824e+09
G1LJJ2	Thioredoxin reductase 1	TXNRD1	1.04345e+09	2.75626e+09	2.62735e+09
G1LAA0	G protein signaling modulator 1	GPSM1	6.55607e+08	2.39336e+09	2.6247e+09
G1L1M2	VWFA domain-containing protein	PSMD4	1.21167e+09	2.1938e+09	2.62469e+09
G1M8U5	Uncharacterized protein	LOC105241883	6.73255e+07	3.2711e+08	2.62319e+09
G1LWJ9	Nuclear mitotic apparatus protein 1	NUMA1	9.47291e+09	3.15104e+09	2.62249e+09
D2HY78	Tubulin beta chain (Fragment)	PANDA_017649	1.13381e+09	3.83137e+09	2.60874e+09
D2HDJ4	Uncharacterized protein (Fragment)	PANDA_008767	2.98315e+08	2.023e+09	2.60498e+09
G1L082	Serine and arginine rich splicing factor 3	SRSF3	2.99253e+09	2.81937e+09	2.58589e+09
G1L3D9	Cytochrome b5 heme-binding domain-containing protein		7.69684e+08	1.62412e+09	2.58154e+09
G1LPW7	Cytochrome c oxidase subunit 5A	COX5A	9.93764e+08	1.64238e+09	2.57612e+09
D2HRI2	Dynein assembly factor 1, axonemal (Fragment)	PANDA_014604	8.30843e+07	2.13832e+09	2.57161e+09
G1LUQ7	Eukaryotic translation initiation factor 3 subunit L	EIF3L	2.06994e+09	2.56839e+09	2.57157e+09
G1LN82	Zona pellucida binding protein	ZPBP	9.51464e+07	2.28283e+09	2.57138e+09
D2HCB2	Uncharacterized protein (Fragment)	CDC42	3.17087e+09	2.08557e+09	2.57125e+09
D2HB37	Ubiquitin-like domain-containing protein	PANDA_007706	2.80988e+09	2.01398e+09	2570259856
G1MFI2	Uncharacterized protein	EIF4G1	2.19649e+09	2.49569e+09	2.5689e+09
D3YBZ8	Ribosomal protein S15A	RPS15A	4.31638e+09	2.60248e+09	2.56813e+09
G1LU83	Ubiquitin like modifier activating enzyme 3	UBA3	6.5199e+08	2.7841e+09	2.56493e+09
G1LWT5	NADPH--cytochrome P450 reductase	POR	9.00598e+09	3.3645e+09	2.56083e+09
D2H5Q1	Uncharacterized protein (Fragment)	PANDA_005239	7.2546e+09	3.55235e+09	2558051928
G1LK15	Phosphoserine aminotransferase 1	PSAT1	8.53756e+08	4.43372e+09	2.55601e+09
G1L171	Uncharacterized protein	UFL1	7.11319e+08	2.29619e+09	2.55192e+09
G1LWF4	4-aminobutyrate aminotransferase	ABAT	1.94714e+08	2.90614e+09	2.55074e+09
D2HPF6	tRNA-binding domain-containing protein (Fragment)	PANDA_013656	1.17467e+09	2.08904e+09	2.53943e+09
G1M084	Neuron navigator 1	NAV1	2.3032e+09	2.33303e+09	2534250560
D2HNP1	Transket_pyr domain-containing protein (Fragment)	PANDA_013327	2.70489e+09	2.5394e+09	2.53425e+09
G1M4X3	TBC1 domain family member 17	TBC1D17	2.72859e+08	2.00478e+08	2.53079e+09
G1MH95	Collagen type I alpha 2 chain	COL1A2	1.20328e+10	4.06739e+09	2.52943e+09
D2H7U7	Uncharacterized protein (Fragment)	PANDA_006259	1.69504e+08	1.78255e+09	2.52925e+09
G1LE42	Uncharacterized protein	AFM	1.323e+09	2.86346e+09	2.52899e+09
G1LC54	N-ethylmaleimide sensitive factor, vesicle fusing ATPase	NSF	1.43965e+09	2.63241e+09	2.52604e+09
G1LND3	Uncharacterized protein	NAPA	1.95161e+09	2.53278e+09	2.52594e+09
D2HRG8	S1 motif domain-containing protein (Fragment)	PANDA_014587	1.76858e+09	2.76738e+09	2.52471e+09
D2HYR2	S4 RNA-binding domain-containing protein (Fragment)	RPS9	4.8411e+09	3.59602e+09	2.52205e+09
G1L1C8	Proteasome subunit beta	PSMB4	1.41069e+09	1.77446e+09	2.52002e+09
G1MF23	Anamorsin	CIAPIN1	4.66801e+08	2.13168e+09	2.51621e+09
D2HQU4	TPR_MLP1_2 domain-containing protein (Fragment)	PANDA_014296	4.37076e+09	2.34131e+09	2.49864e+09
G1LEL4	Uncharacterized protein	TSN	5.26672e+08	2.36052e+09	2.49849e+09
G1LX58	Uncharacterized protein	PDXDC1	8.76291e+08	2.62265e+09	2.49633e+09
D2H2K2	Histone H2B (Fragment)	LOC100468404	2.83021e+07	4.60276e+09	2.49176e+09
D2H4K0	Uncharacterized protein (Fragment)	PANDA_004723	2.29699e+09	3.29108e+09	2.49043e+09
G1L5X4	Peptidylprolyl isomerase		1.7303e+09	2.84765e+09	2.4837e+09
G1M1U5	AAA domain-containing protein	PSMC4	2.394e+09	2.67983e+09	2.48139e+09
D2HGS6	Uncharacterized protein (Fragment)	PANDA_010252	1.40466e+09	3.38095e+09	2.46725e+09
D2H9W7	DLH domain-containing protein (Fragment)	CMBL	1.23111e+09	2.30672e+09	2.46573e+09
G1MI18	Ecm29 proteasome adaptor and scaffold	ECPAS	1.62037e+09	2.31718e+09	2.46258e+09
G1L4F4	Tudor domain containing 6	TDRD6	4.17248e+08	2.04856e+09	2.46214e+09
G1M8C8	AP complex subunit beta	AP2B1	2.60853e+09	2.23511e+09	2.45897e+09
G1L9G0	Guanidinoacetate N-methyltransferase	GAMT	5.58227e+08	2.05744e+09	2.44519e+09
G1M6B7	LRRcap domain-containing protein	ANP32A	7.10115e+09	3.03354e+09	2.44207e+09
G1LDS5	Protein disulfide isomerase family A member 5	PDIA5	2.79069e+09	2.7343e+09	2.43997e+09
D2I616	PCI domain-containing protein (Fragment)	PSMD13	2.45341e+09	3.65645e+09	2.43265e+09
G1KZU3	Protein kinase domain-containing protein	PBK	1.20942e+08	3.01131e+09	2.43076e+09
D2GX92	Synaptophysin like 1 (Fragment)	SYPL1	5.10154e+08	1.98603e+09	2.42397e+09
D2I216	CDGSH iron sulfur domain 1 (Fragment)	CISD1	2.831e+08	1.8636e+09	2.42172e+09
G1M2V5	Calpastatin	CAST	1.13514e+09	1.94132e+09	2.41108e+09
G1LPH3	ACB domain-containing protein	DBI	2.81837e+09	2.38926e+09	2.40457e+09
G1LH34	Tubulin-specific chaperone A		8.10195e+08	2.98921e+09	2.40401e+09
G1LYI8	Uncharacterized protein	CDC37	1.82143e+09	1.84467e+09	2.39879e+09
G1LZ13	Ribosomal_L7Ae domain-containing protein		6.27386e+09	4.51927e+09	2.38358e+09
D2GXH8	Uncharacterized protein (Fragment)	PANDA_001608	4.0815e+09	1.82518e+09	2.37663e+09
G1MHI6	Serine/threonine-protein phosphatase	PPP2CA	1.34569e+09	2.34927e+09	2.3729e+09
G1M9J0	Eukaryotic translation initiation factor 4A3	EIF4A3	3.12429e+09	2.99036e+09	2.36647e+09
G1LN78	DNA topoisomerase 2	TOP2A	8.74339e+08	4.18432e+09	2.36639e+09
D2HGI1	M16C_associated domain-containing protein (Fragment)	PANDA_010136	1.06902e+09	2.22933e+09	2.35908e+09
G1MFG4	Cold shock domain containing E1	CSDE1	1.24207e+09	1.71937e+09	2.35135e+09
G1L685	Structural maintenance of chromosomes protein	SMC4	6.62864e+08	8.30974e+08	2.34844e+09
G1MBX7	Histone H2B		6.01769e+09	4.45894e+09	2.3432e+09
D2HPA6	Uncharacterized protein (Fragment)	CKM	1.79382e+09	9.04011e+08	2.34301e+09
G1M2D6	Eukaryotic translation initiation factor 3 subunit E	EIF3E	1.35922e+09	1.69912e+09	2.34185e+09
D2HUL3	UBIQUITIN_CONJUGAT_2 domain-containing protein (Fragment)	PANDA_015972	1.33681e+09	2.06729e+09	2.33737e+09
G1LLK2	Far upstream element binding protein 1	FUBP1	4.2783e+09	2.40183e+09	2.336e+09
G1M5C9	Uncharacterized protein		1.22099e+09	2.86189e+09	2.33297e+09
G1MA94	Elastin	ELN	7.4092e+08	2.61393e+09	2.33118e+09
G1M8Z2	Uncharacterized protein	ACTR3	3.66152e+09	2.42672e+09	2.33097e+09
G1LTF7	Proteasome 26S subunit, non-ATPase 3	PSMD3	1.76958e+09	2.23332e+09	2.33011e+09
G1LKT4	FUS RNA binding protein	FUS	4.5676e+09	2.56189e+09	2.32897e+09
F2X244	Ribosomal protein	Rpl0A	4.44347e+09	2.74444e+09	2.3217e+09
D2HI58	Eukaryotic translation initiation factor 3 subunit I (Fragment)	EIF3I	2.30471e+09	2.20544e+09	2.3208e+09
G1M4T2	Serine and arginine rich splicing factor 2	SRSF2	2.35275e+09	1.80453e+09	2317966025
G1MH10	AMP-binding domain-containing protein	ACSL6	1.34e+08	2.0075e+09	2.30625e+09
D2GVF3	Uncharacterized protein (Fragment)	PANDA_000702	2.89417e+09	1.88124e+09	2.30541e+09
D2HEW0	Uncharacterized protein (Fragment)	QARS	1.09653e+09	2.03801e+09	2304414996
G1LIZ2	Tubulin polymerization promoting protein family member 2	TPPP2	3.43455e+08	7.66519e+08	2.30409e+09
G1M9Y5	Coatomer subunit gamma	COPG1	3.71552e+09	2.58202e+09	2.2717e+09
G1LF60	Uncharacterized protein		9.6742e+08	3.4012e+09	2.26314e+09
D2HFG9	Uncharacterized protein (Fragment)	ACBD6	3.41498e+08	2.00827e+09	2.26265e+09
D2HCZ7	IQ motif containing GTPase activating protein 1 (Fragment)	IQGAP1	7.08961e+09	2.29736e+09	2.26135e+09
D2GUU4	Uncharacterized protein (Fragment)	PANDA_000445	9.47732e+08	3.29296e+09	2.25776e+09
G1MC06	Cytoskeleton associated protein 4	CKAP4	1.89976e+10	3.09487e+09	2256625055
D2HWR8	Uncharacterized protein (Fragment)	OAT	6.54512e+08	2.49749e+09	2.24707e+09
G1M9R1	Uncharacterized protein	RAB7A	2.54879e+09	2.45844e+09	2.24502e+09
G1LPC4	AIRC domain-containing protein		4.05875e+09	1.92003e+09	2.24389e+09
G1M5L6	ATP-dependent 6-phosphofructokinase	PFKM	1.89778e+09	1.92394e+09	2.23484e+09
G1LEG6	Methionyl-tRNA synthetase	MARS	1.67957e+09	2.15677e+09	2.22829e+09
G1LTZ6	Glutamate dehydrogenase		3.67202e+09	1.51134e+09	2.22801e+09
G1LKB0	Phosphoacetylglucosamine mutase	PGM3	1.05022e+09	1.85231e+09	2.2229e+09
D2HUZ8	DNA topoisomerase 2 (Fragment)	PANDA_016140	2.89437e+09	3.06338e+09	2.22179e+09
D2H3B6	WD_REPEATS_REGION domain-containing protein (Fragment)	WDR44	1.77921e+09	2.16246e+09	2.2169e+09
G1LJL6	Rac family small GTPase 1	RAC1	2.29946e+09	2.10059e+09	2216415673
G1LVI5	Small RNA binding exonuclease protection factor La	SSB	2.48128e+09	2.71567e+09	2.21286e+09
D2GXP0	Uncharacterized protein (Fragment)	RAB10	1.89338e+09	2.18325e+09	2.21121e+09
G1LD33	Carnosine dipeptidase 2	CNDP2	1.59627e+09	3.28252e+09	2.20932e+09
G1LU50	Isoleucyl-tRNA synthetase 2, mitochondrial	IARS2	1.14265e+09	2.61872e+09	2.20592e+09
G1MAY8	NADH:ubiquinone oxidoreductase subunit A9	NDUFA9	1.0711e+09	2.12705e+09	2.20202e+09
G1M7U8	Eukaryotic translation initiation factor 4 gamma 2	EIF4G2	1.92552e+09	2.24555e+09	2.20124e+09
D2GZK9	Uncharacterized protein (Fragment)	RPL3	4.43287e+09	5.21681e+09	2.20029e+09
C6ZIA4	40S ribosomal protein S25	RPS25	2.89188e+09	2.91491e+09	2.19785e+09
D2I5D7	Uncharacterized protein (Fragment)	COQ5	1.59041e+08	2.73492e+08	2.19287e+09
G1L5E3	Myelin expression factor 2	MYEF2	1.13375e+09	2.34715e+09	2.17366e+09
G1LDY4	Hydroxysteroid 17-beta dehydrogenase 12	HSD17B12	1.77457e+09	2.9156e+09	2.17138e+09
G1LES1	Uncharacterized protein	SCFD1	1.44235e+09	2.31665e+09	2.1648e+09
G1L108	Beta-hexosaminidase		8.98114e+08	1.17869e+09	2.16431e+09
D2I2P4	Uncharacterized protein (Fragment)	PANDA_019683	1.46776e+09	1.45333e+09	2.15734e+09
G1LWF1	WD_REPEATS_REGION domain-containing protein	GNB4	3.31727e+09	2.16761e+09	2.15594e+09
D2HVX2	Uncharacterized protein (Fragment)	PRKACB	1.28306e+09	2.10615e+09	2.15428e+09
G1LNI3	Myosin IC	MYO1C	2.2587e+09	3.78498e+09	2.15034e+09
D2HC27	AA_TRNA_LIGASE_II domain-containing protein (Fragment)	PANDA_008118	1.37586e+09	1.30352e+09	2.14423e+09
G1LLL9	RAB12, member RAS oncogene family	RAB12	1.16261e+09	1.98895e+09	2.14382e+09
G1LZI0	FHA domain-containing protein	SLMAP	3.66177e+08	2.47963e+09	2.13902e+09
G1LVF6	Uncharacterized protein	DHX15	2.42918e+09	2.40551e+09	2.13366e+09
G1M307	SGL domain-containing protein	RGN	6.34977e+08	1.5269e+09	2132209756
G1L5J8	Uncharacterized protein		1.72241e+09	2.47313e+09	2.12702e+09
G1LZ42	SEC22 homolog B, vesicle trafficking protein (gene/pseudogene)	SEC22B	1.51342e+09	3.39718e+09	2.12639e+09
G1M4K5	Uncharacterized protein	ASAH1	6.14166e+08	2.42622e+09	2.12591e+09
G1L761	Carbonic anhydrase 2	CA2	6.99567e+08	8.47469e+08	2.12549e+09
D2HD52	Histone H3 (Fragment)	H3F3A	1.27816e+09	4.25861e+09	2.12237e+09
F2X213	Ribosomal protein S10	RPS10	3.17666e+09	2.33557e+09	2.1219e+09
G1L912	Arp2/3 complex 34 kDa subunit		2.54088e+09	1.92299e+09	2.12103e+09
G1LDF7	Myosin light chain kinase	MYLK	3.69978e+09	2.71457e+09	2.11912e+09
G1LG69	Lamin B2	LMNB2	2.85948e+09	2.05576e+09	2.11776e+09
D2HG52	Importin N-terminal domain-containing protein (Fragment)	PANDA_009939	2.98974e+08	1.3819e+09	2.11475e+09
G1L729	Uncharacterized protein	CTC1	7.43244e+08	2.1683e+09	2114391153
G1MB95	Actin-related protein 2	ACTR2	2.6617e+09	1.99235e+09	2.10805e+09
G1LHU6	Pyruvate kinase	PKM	4.1765e+09	2.42963e+09	2.10558e+09
G1LSW0	Uncharacterized protein	SMARCA5	2.23862e+09	3.12573e+09	2.1011e+09
G1MEC4	Uncharacterized protein	EIF4A1	3.36074e+09	2.19398e+09	2.09884e+09
G1LHS6	Uncharacterized protein	OPLAH	4.09716e+08	1.08603e+09	2.09785e+09
G1LX99	Uncharacterized protein	DNM2	3.18276e+09	1.82411e+09	2.09678e+09
G1LCI0	Proteasome subunit beta	PSMB3	1.62733e+09	1.50764e+09	2.09156e+09
D2HYT9	Histone H2A (Fragment)	PANDA_017927	1.1712e+09	1.43148e+09	2088839646
D2HC15	Uncharacterized protein (Fragment)	PANDA_008104	1.02189e+08	1.52365e+09	2.08715e+09
G1LLU2	Tyrosine--tRNA ligase	YARS	1.66651e+09	1.78627e+09	2.08226e+09
G1L2A9	RAB14, member RAS oncogene family	RAB14	1.40594e+09	2.33154e+09	2.07616e+09
D2HGU3	Importin N-terminal domain-containing protein (Fragment)	PANDA_010274	6.16124e+09	4.75628e+09	2.07537e+09
G1M4Q5	WD_REPEATS_REGION domain-containing protein	GNB1	2.16989e+09	1.87493e+09	2.06945e+09
G1M8K9	Uncharacterized protein	LRPAP1	2.16023e+09	2.48684e+09	2.06641e+09
D2H3C2	Cytochrome b5 heme-binding domain-containing protein (Fragment)	PANDA_004180	1.92792e+09	2.03211e+09	2.065e+09
D2H6Y6	Uncharacterized protein (Fragment)	PANDA_005863	8.43016e+08	1.91079e+09	2.05968e+09
D2HTF2	Uncharacterized protein (Fragment)	PANDA_015445	7.98628e+08	1.93888e+09	2.05592e+09
G1MDP9	Septin 2	2024-09-02	5.14196e+09	1.88696e+09	2.05402e+09
G1LCJ0	Decorin	DCN	1.21179e+10	4.14152e+09	2.05365e+09
D2HZB0	Calcium uptake protein 1, mitochondrial	MICU1	9.02434e+07	2.34577e+08	2.04815e+09
G1L1I8	Proteasome subunit beta	PSMB2	1.23095e+09	1.60102e+09	2.04655e+09
G1LF02	Ectonucleotide pyrophosphatase/phosphodiesterase family member 5	ENPP5	1.70584e+08	1.88447e+09	2.04599e+09
G1M1W7	Glycine amidinotransferase	GATM	3.61249e+09	3.2511e+09	2.04536e+09
G1M153	Dynein light intermediate chain	DYNC1LI1	1.06442e+09	2.10778e+09	2.0415e+09
D2GXN0	Uncharacterized protein (Fragment)	MAPRE3	3.47608e+08	2.91344e+09	2.0385e+09
G1L6F4	Peptidylprolyl isomerase D	PPID	8.62008e+08	2.1576e+09	2.03678e+09
G1MHR4	GRIP domain-containing protein	GOLGA4	3.58033e+08	1.61383e+09	2035675071
G1LX55	Huntingtin interacting protein 1	HIP1	6.08082e+08	1.50865e+09	2.03383e+09
G1MIY8	NPC intracellular cholesterol transporter 2	NPC2	1.2218e+09	1.13447e+09	2.03232e+09
D2HKL2	Uncharacterized protein (Fragment)	PANDA_011932	2.74999e+09	1.88558e+09	2.02723e+09
G1L9R1	PKS_ER domain-containing protein	CRYZ	7.48125e+08	2.59635e+09	2.02699e+09
G1LM38	SAP domain-containing protein	ACIN1	1.82748e+09	2.18539e+09	2.02355e+09
G1MJ25	LSM12 homolog	LSM12	1.36604e+08	1.73765e+08	2.02229e+09
G1MIW8	Protein-L-isoaspartate O-methyltransferase	PCMT1	1.10425e+09	1.7956e+09	2.01777e+09
G1MGN5	Uncharacterized protein		5.401e+08	1.67336e+09	2.01755e+09
G1MF49	Serpin family H member 1	SERPINH1	3.18747e+10	2.94164e+09	2.01582e+09
G1M9Z3	CCHC-type zinc finger nucleic acid binding protein	CNBP	1.53865e+09	1.68071e+09	2.01299e+09
D2HNF8	UPAR/Ly6 domain-containing protein (Fragment)	LYPD4	1.26647e+07	1.78299e+09	2.00628e+09
G1MJ31	Acylphosphatase	ACYP1	1.57774e+08	3.62492e+09	2001150860
D2HQK5	NAD(P)(+)--arginine ADP-ribosyltransferase (Fragment)	PANDA_014183	1.42938e+06	1.56644e+09	2.0003e+09
G1LBB5	Translocase of outer mitochondrial membrane 70	TOMM70	1.47871e+09	2.27154e+09	1.99392e+09
D2GUL3	Glucosamine-6-phosphate isomerase (Fragment)	GNPDA1	4.84656e+08	2.06973e+09	1.99071e+09
G1L4W1	Uncharacterized protein		5.51187e+09	3.24034e+09	1.98742e+09
G1LCS6	Palmitoyl-protein thioesterase 1	PPT1	6.5184e+08	1.67602e+09	1.98516e+09
D2H4M9	SAP domain-containing protein (Fragment)	PANDA_004767	2.48598e+09	1.4254e+09	1.98413e+09
D2HXK5	Uncharacterized protein (Fragment)	PANDA_017376	4.8296e+09	2.62029e+09	1.98176e+09
D2GTW0	Nuclear pore complex protein Nup93 (Fragment)	NUP93	1.53822e+09	2.2628e+09	1.9787e+09
G1LD50	Sperm acrosome associated 1	SPACA1	1.17987e+08	1.41105e+09	1.97592e+09
G1L5Q6	Uncharacterized protein	RTRAF	2.25465e+09	2.83557e+09	1.96814e+09
D2HYB8	Uncharacterized protein (Fragment)	RAB2B	1.50346e+09	2.7391e+09	1.96543e+09
G1L3B0	F-actin-capping protein subunit alpha	CAPZA2	2.36241e+09	2.08598e+09	1.96476e+09
G1LMG5	Uncharacterized protein	SF3A1	3.13004e+09	2.48426e+09	1.96159e+09
F2X226	40S ribosomal protein S27	RPS27	2.36296e+09	1.78591e+09	1960384615
G1M4D3	Ring finger protein 114	RNF114	2.63461e+08	1.53643e+09	1.9558e+09
G1MIC6	Ubiquitin thioesterase	OTUB1	1.55158e+09	2.12078e+09	1.95495e+09
G1L3W1	PCI domain-containing protein	COPS2	1.16765e+09	1.63929e+09	1.94841e+09
D2HNR7	Uncharacterized protein	PANDA_013362	2.58833e+09	3.53376e+09	1.9454e+09
G1LM67	DnaJ heat shock protein family (Hsp40) member A1	DNAJA1	1.1629e+09	2.15368e+09	1.94136e+09
G1LPD0	Hydroxyacylglutathione hydrolase	HAGH	1.46143e+08	1.4015e+09	1.93525e+09
G1MJ57	Anion exchange protein	SLC4A1	7.78917e+08	5.47792e+08	1.93088e+09
G1M3B3	RAN binding protein 2	RANBP2	3.4281e+09	1.91512e+09	1.92911e+09
G1M6A9	Sodium/potassium-transporting ATPase subunit alpha	ATP1A2	4.17215e+08	1.21164e+09	1923109621
G1LX50	Acidic residue methyltransferase 1	ARMT1	2.55377e+08	1.58622e+09	1.92153e+09
G1MAD0	Apolipoprotein A2	APOA2	4.04261e+09	1.40137e+09	1.92082e+09
G1LIN2	SPT16 homolog, facilitates chromatin remodeling subunit	SUPT16H	2.01269e+09	2.26512e+09	1.92068e+09
D2HRE3	Rib_recp_KP_reg domain-containing protein (Fragment)	PANDA_014557	7.07521e+09	2.00448e+09	1.91664e+09
G1L1M7	RIIa domain-containing protein		1.18381e+08	2.0766e+09	1.91122e+09
G1LE45	Tudor domain-containing protein 7	TDRD7	7.99078e+08	1.85522e+09	1.90882e+09
D2HMT7	Uncharacterized protein (Fragment)	HNRNPUL1	2.56669e+09	2.29427e+09	1.90652e+09
D2H3A5	Uncharacterized protein	PDCD5	9.00058e+08	2.035e+09	1.89712e+09
G1MC92	Uncharacterized protein	NONO	6.50448e+09	3.28751e+09	1.895e+09
G1LWZ3	Uncharacterized protein	CP	2.42142e+09	1.87123e+09	1.89293e+09
D2HC75	SGNH_hydro domain-containing protein (Fragment)	PAFAH1B2	1.03672e+09	1.47774e+09	1.89197e+09
G1MDX2	Uncharacterized protein	ABCE1	1.38272e+09	1.70001e+09	1.88424e+09
D2H1P9	B12-binding domain-containing protein (Fragment)	MMUT	1.13005e+09	1.97823e+09	1.87717e+09
G1MF58	Uncharacterized protein	P4HA1	1.60899e+09	2.01968e+09	1874857566
D2H311	Uncharacterized protein (Fragment)	PSMD5	2.45978e+09	1.8996e+09	1.87092e+09
G1MJ97	Tr-type G domain-containing protein	EFTUD2	3.48266e+09	2.76007e+09	1.86792e+09
G1L8F2	Nucleobindin 2	NUCB2	6.12472e+08	1.76463e+09	1.86775e+09
D2H7Z5	Ribosomal_L18e/L15P domain-containing protein (Fragment)	RPL18	6.14628e+09	3.78173e+09	1.8665e+09
G1MH92	Transmembrane p24 trafficking protein 4	TMED4	1.50218e+08	1.70527e+09	1.86406e+09
G1LUM7	RB binding protein 7, chromatin remodeling factor	RBBP7	2.51886e+09	2.2567e+09	1.86256e+09
G1LN02	Uncharacterized protein	LOC100473656	2.77321e+07	1.32205e+09	1.85559e+09
G1LGV5	RAB2A, member RAS oncogene family	RAB2A	1.50122e+09	1.65177e+09	1.85499e+09
D2GV28	Uncharacterized protein (Fragment)	PANDA_000547	5.72643e+08	1.411e+09	1.85113e+09
D2GWJ7	Replication protein A2 (Fragment)	RPA2	1.14496e+09	1.92946e+09	1.84794e+09
G1LH03	DNA helicase	MCM6	3.08025e+09	2.26067e+09	1.8477e+09
D2GTZ0	Uncharacterized protein (Fragment)	PANDA_000061	1.82177e+09	1.79771e+09	1.84692e+09
G1LYU0	Uncharacterized protein	CTNNB1	2.35133e+09	1.67981e+09	1841954805
D2H485	Protein transport protein SEC23 (Fragment)	SEC23A	2.61751e+09	1.95936e+09	1.84142e+09
D2HMR2	Pept_C1 domain-containing protein (Fragment)	PANDA_012896	1.12402e+09	7.40858e+08	1.84033e+09
G1LJ93	Early endosome antigen 1	EEA1	1.71673e+09	1.95085e+09	1.83753e+09
G1LLZ5	UBIQUITIN_CONJUGAT_2 domain-containing protein		1.00713e+09	1.89443e+09	1.83743e+09
G1M1Y1	Fibrillarin	FBL	3.14541e+09	1.84405e+09	1.83698e+09
G1LGZ1	Uncharacterized protein	NAP1L4	1.44837e+09	2.13386e+09	1.83435e+09
G1M116	Prohibitin	PHB	2.66271e+09	2.20645e+09	1.83338e+09
D2HEF1	Uncharacterized protein (Fragment)	SEC24C	9.27511e+08	1.99786e+09	1.83283e+09
G1MGC3	Uncharacterized protein		1.00303e+09	1.67795e+09	1.82659e+09
G1LIY2	Rho guanine nucleotide exchange factor 40	ARHGEF40	2.46511e+08	6.55852e+06	1.82437e+09
G1LXZ9	Small nuclear ribonucleoprotein-associated protein	SNRPB	2.24997e+09	2.22531e+09	1.82328e+09
G1LVX3	Protein kinase cAMP-dependent type I regulatory subunit alpha	PRKAR1A	1.87595e+09	2.31582e+09	1.82134e+09
G1L2V2	PKS_ER domain-containing protein	LOC100479522	5.53007e+08	9.20289e+08	1.81621e+09
G1M3D1	DExH-box helicase 30	DHX30	9.75155e+08	1.59681e+09	1.81034e+09
G1LXY1	Calcineurin like phosphoesterase domain containing 1	CPPED1	3.92729e+08	1.04397e+09	1.80932e+09
D2H0A8	Uncharacterized protein (Fragment)	PANDA_002843	1.08692e+09	1.47059e+09	1.80772e+09
G1M0I2	OBG-type G domain-containing protein	LOC100475225	1.04974e+09	1.26758e+09	1.8076e+09
G1L3G9	TFCD_C domain-containing protein	TBCD	1.55821e+09	1.6159e+09	1798469619
G1L0V0	Microfibril associated protein 2	MFAP2	1.54525e+09	1.47255e+09	1.79803e+09
D2H4L6	Uncharacterized protein (Fragment)	PANDA_004747	4.33122e+08	4.03007e+08	1.7926e+09
G1MD91	Amine oxidase	MAOB	2.70347e+08	8.76492e+08	1.79135e+09
D2I1W1	CULLIN_2 domain-containing protein (Fragment)	PANDA_019319	1.05263e+09	1.5937e+09	1.79076e+09
G1M5T4	Uncharacterized protein		3.61315e+09	1.73822e+09	1789117134
G1M6N8	Adipocyte plasma membrane associated protein	APMAP	8.39391e+08	2.27326e+09	1.777e+09
G1LRI0	M20_dimer domain-containing protein		1.04119e+09	8.00053e+08	1776872118
G1M663	Protein kinase domain-containing protein		1.13209e+09	1.93151e+09	1.77641e+09
G1LZY7	IF rod domain-containing protein	KRT18	3.72265e+09	7.82429e+08	1.77632e+09
D2H4S8	Alpha-1,4 glucan phosphorylase (Fragment)	PANDA_004837	5.04985e+08	7.51106e+08	1774808396
G1M2K5	Uncharacterized protein	NCOA5	5.17099e+08	1.79375e+09	1.77404e+09
D2HVN5	WD_REPEATS_REGION domain-containing protein (Fragment)	LOC100480626	9.90579e+07	1.71965e+09	1.77269e+09
D2HS06	USP domain-containing protein (Fragment)	PANDA_014824	5.77985e+08	1.0802e+09	1.77242e+09
G1LX74	Adenylosuccinate lyase	ADSL	1.34355e+09	1.63559e+09	1.76049e+09
G1L8P2	Synaptonemal complex central element protein 1	SYCE1	1.1038e+08	1.23065e+09	1.75447e+09
G1M593	Prohibitin	PHB2	2.40799e+09	2.43824e+09	1.75427e+09
G1MFP8	Protein phosphatase methylesterase 1	PPME1	4.1769e+08	1.58533e+09	1752713189
G1M2H4	Elongin C	ELOC	1.16654e+09	1.27107e+09	1.75248e+09
D2H522	Malic enzyme (Fragment)	ME2	1.16184e+09	3.01309e+09	1.75129e+09
D2HIT1	Uncharacterized protein (Fragment)	RAB5C	1.35897e+09	1.70896e+09	1.75086e+09
D2HSS4	DNA helicase (Fragment)	MCM5	2.65251e+09	1.70616e+09	1.75073e+09
G1LTT3	Atlastin GTPase 1	ATL1	4.24763e+08	1.86275e+09	1.74882e+09
G1L2Q2	Uncharacterized protein	C5	5.85376e+08	1.25881e+09	1.74679e+09
G1MHM9	Enoyl-CoA delta isomerase 1	ECI1	6.67378e+08	8.87745e+08	1.74497e+09
G1MG90	ASPSCR1 tether for SLC2A4, UBX domain containing	ASPSCR1	3.37394e+08	9.69545e+08	1.74403e+09
G1LDX3	Isochorismatase domain containing 1	ISOC1	1.74639e+09	1.8666e+09	1.74398e+09
G1LN49	Phosphatidylinositol transfer protein alpha	PITPNA	1.05061e+09	1.5023e+09	1.73614e+09
D2HQF0	L-type lectin-like domain-containing protein (Fragment)	LMAN1	1.16744e+09	1.96617e+09	1.73473e+09
G1LPW4	Uncharacterized protein	RAP1B	1.89002e+09	1.56418e+09	1.73367e+09
G1LUQ9	Phosphoribosyl pyrophosphate synthetase associated protein 1	PRPSAP1	4.20427e+08	1.82621e+09	1.7293e+09
G1L6V5	AP-1 complex subunit gamma	AP1G1	1.09979e+09	1.54826e+09	1.72879e+09
G1LB57	ARL2_Bind_BART domain-containing protein	CFAP36	9.48285e+07	1.22761e+09	1.71985e+09
G1LR13	X-prolyl aminopeptidase 1	XPNPEP1	1.84232e+09	1.41562e+09	1.71671e+09
D2HET1	Uncharacterized protein (Fragment)	GNAI2	3.56348e+09	1.74114e+09	1.71517e+09
G1M4G1	Family with sequence similarity 129 member A	FAM129A	2.63543e+09	1.26522e+09	1.71106e+09
G1L331	UTP--glucose-1-phosphate uridylyltransferase	UGP2	7.58849e+08	1.33829e+09	1.71021e+09
G1MHV9	Transforming growth factor beta induced	TGFBI	6.79108e+09	1.80492e+09	1.709e+09
D2HUN9	40S ribosomal protein S8 (Fragment)	RPS8	4.52592e+09	3.29752e+09	1.70868e+09
D2HN93	SHC binding and spindle associated 1 like (Fragment)	SHCBP1L	1.07466e+08	2.49893e+09	1.70803e+09
G1LP39	EWS RNA binding protein 1	EWSR1	1.05956e+09	1.56514e+09	1.70702e+09
D2HQQ3	Uncharacterized protein (Fragment)	PANDA_014242	2.39599e+09	1.1533e+09	1.70688e+09
G1M7I9	Serrate, RNA effector molecule	SRRT	2.44134e+09	2.07291e+09	1.70315e+09
G1L4R0	Uncharacterized protein	CAD	2.93885e+09	1.7103e+09	1.6947e+09
G1KZH0	Maelstrom spermatogenic transposon silencer	MAEL	1.80754e+08	1.58338e+09	1.69467e+09
D2HLF8	Uncharacterized protein (Fragment)	PANDA_012325	8.40752e+08	1.50041e+09	1.69369e+09
G1LUC7	TATA element modulatory factor 1	TMF1	2.25482e+08	1.52219e+09	1.69255e+09
G1LL41	Cytochrome b-c1 complex subunit 7	UQCRB	6.98496e+08	1.23725e+09	1690224476
G1LI47	RAB11 binding and LisH domain, coiled-coil and HEAT repeat containing	RELCH	4.16149e+08	1.94138e+09	1.68869e+09
G1M1B2	Uncharacterized protein	LTF	1.34601e+10	1.401e+09	1685807768
G1MEM8	Scm polycomb group protein like 2	SCML2	1.29231e+08	1.84208e+09	1.68573e+09
G1LBN8	Tyrosine 3-monooxygenase/tryptophan 5-monooxygenase activation protein beta	YWHAB	3.34735e+09	2.24425e+09	1.6846e+09
G1LGT2	tRNA-synt_1e domain-containing protein	CARS	1.27681e+09	1.74211e+09	1.67766e+09
G1MIX7	Uncharacterized protein	LOC100463627	1.47805e+09	1.70833e+09	1.67568e+09
G1MD89	Uncharacterized protein	SART3	2.58213e+09	1.56442e+09	1.67399e+09
G1LXJ9	Annexin	ANXA13	6.89506e+06	1.60454e+09	1.66997e+09
G1M9V8	Uncharacterized protein	GTF2I	4.28811e+09	1.94019e+09	1.66953e+09
G1L8R6	Arylsulfatase A	ARSA	2.14252e+08	2.32005e+09	1.66515e+09
D2HMC0	Uncharacterized protein (Fragment)	PANDA_012707	1.28659e+09	1.326e+09	1663464162
G1LT25	Glycerol-3-phosphate dehydrogenase [NAD(+)]	GPD1L	9.43321e+08	1.64531e+09	1.66137e+09
G1LPP2	Solute carrier family 25 member 12	SLC25A12	1.32201e+09	2.54716e+09	1.65995e+09
D2GW30	Uncharacterized protein (Fragment)	KIAA1217	7.87938e+08	7.86464e+08	1.65968e+09
G1MFC1	Dynein light intermediate chain	DYNC1LI2	1.51974e+09	1.62587e+09	1.65965e+09
G1LY51	Ubiquitin carboxyl-terminal hydrolase	UCHL3	7.54649e+08	1.89254e+09	1658588776
G1LSH3	BUB3 mitotic checkpoint protein	BUB3	2.05508e+09	1.74668e+09	1.65752e+09
D2HQA5	IBB domain-containing protein (Fragment)	KPNA2	5.01853e+08	2.61944e+09	1.65628e+09
D2H256	Dynein light chain (Fragment)	DYNLL2	1.54549e+09	2.79893e+09	1.65308e+09
G1LLJ1	Cortactin	CTTN	2.60785e+09	1.76101e+09	1.65127e+09
G1LIU8	Uncharacterized protein	NAGLU	3.98637e+08	1.24856e+09	1.6503e+09
G1M866	Branched-chain-amino-acid aminotransferase	BCAT2	7.25032e+08	1.27051e+09	1.64901e+09
D2GXI7	SAP domain-containing protein (Fragment)	PANDA_001618	2.73663e+09	1.22978e+09	1.64755e+09
D2HL15	Uncharacterized protein (Fragment)	PANDA_012131	3.05625e+08	1.48232e+09	1.64498e+09
G1LWC8	Heat shock protein family A (Hsp70) member 12B	HSPA12B	1.74462e+09	1.68729e+09	1.64491e+09
G1LIC1	Uncharacterized protein		1.82615e+08	5.38218e+08	1.64442e+09
D2I4I6	Vitellogenin domain-containing protein (Fragment)	PANDA_020511	1.89949e+09	4.96806e+08	1.64163e+09
G1LAJ9	Serine and arginine rich splicing factor 6	SRSF6	3.19014e+09	2.34776e+09	1.64156e+09
G1LLJ2	Protein arginine N-methyltransferase 5	PRMT5	1.19123e+09	1.56657e+09	1.64056e+09
G1LM51	Uncharacterized protein	CHORDC1	5.19504e+08	1.62256e+09	1.64042e+09
G1MBJ4	Succinyl-CoA:3-ketoacid-coenzyme A transferase	OXCT1	4.74852e+08	2.22334e+09	1.6403e+09
G1MIG1	Uncharacterized protein	GGH	1.33808e+09	9.34436e+08	1639840092
D2H441	Uncharacterized protein (Fragment)	PANDA_004520	1.3743e+09	1.79509e+09	1.63899e+09
G1LQW5	RUN and FYVE domain containing 1	RUFY1	9.16373e+08	1.98828e+09	1.63353e+09
D2H1U0	Uncharacterized protein (Fragment)	PANDA_003524	1.00782e+09	1.4033e+09	1.63333e+09
D2GXL3	PPM-type phosphatase domain-containing protein (Fragment)	PPM1G	9.69994e+08	2.16414e+09	1632149928
D2I190	CTP synthase (Fragment)	CTPS1	8.10451e+08	1.15604e+09	1.62807e+09
G1LCE1	Endoplasmic reticulum protein 44	ERP44	2.06204e+09	1.6624e+09	1.62646e+09
G1LZB6	Uncharacterized protein	ARF4	2.35906e+09	2.15356e+09	1.62634e+09
G1LTI4	Zona pellucida binding protein 2	ZPBP2	3.18182e+07	8.70838e+08	1.62525e+09
G1M4B0	TMEM189-UBE2V1 readthrough	TMEM189-UBE2V1	6.80176e+08	1.64935e+09	1.62394e+09
G1LH15	Uncharacterized protein		1.29757e+08	1.19879e+09	1.62072e+09
D2HRE4	ADF-H domain-containing protein (Fragment)	PANDA_014558	7.49513e+08	1.71542e+09	1.61992e+09
G1LZT4	ADP ribosylation factor like GTPase 8A	ARL8A	1.10763e+09	1.89272e+09	1.61961e+09
G1L4Y7	Hydroxyacyl-CoA dehydrogenase	HADH	2.74942e+09	1.93975e+09	1.61414e+09
G1LS26	BCL2 associated athanogene 6	BAG6	8.23314e+08	1.58192e+09	1.61377e+09
G1LTJ5	Ribosomal_L18_c domain-containing protein	RPL5	3.41588e+09	2.50966e+09	1.61339e+09
G1M300	Delta-aminolevulinic acid dehydratase	ALAD	7.77538e+08	1.46327e+09	1.61278e+09
G1LAD6	Exportin 7	XPO7	1.76349e+09	1.86734e+09	1.61197e+09
G1LHA5	Uncharacterized protein		7.95545e+08	1.92283e+09	1.61182e+09
G1LGZ3	3-hydroxyisobutyrate dehydrogenase	HIBADH	9.57988e+08	1.65339e+09	1.61142e+09
G1LY76	Pyridoxal kinase	PDXK	8.31241e+08	1.64929e+09	1.60927e+09
G1LPP7	DNA helicase	MCM3	2.33815e+09	1.45592e+09	1.60672e+09
G1LY63	Prolyl endopeptidase	PREP	1.35058e+09	6.50626e+08	1.60419e+09
G1MFF0	NEDD8-activating enzyme E1 regulatory subunit	NAE1	3.91103e+08	1.81391e+09	1.6015e+09
D2I5D5	Thioredoxin domain-containing protein (Fragment)	TMX1	7.43312e+08	1.94073e+09	1.60078e+09
D2H9F9	NTF2 domain-containing protein (Fragment)	NUTF2	1.44796e+09	1.44242e+09	1.59809e+09
D2HRJ5	Alpha-mann_mid domain-containing protein (Fragment)	PANDA_014618	4.13391e+08	1.92682e+09	1.59732e+09
G1L2H0	Uncharacterized protein	FETUB	2.59498e+09	2.10333e+09	1.5965e+09
G1LPZ2	Mannose-6-phosphate isomerase	MPI	4.26566e+08	1.19147e+09	1.59516e+09
G1LRR8	Casein kinase II subunit beta	CSNK2B	5.87454e+08	1.61946e+09	1589631340
G1LM14	Spermatogenesis-associated protein 20	SPATA20	1.23734e+08	9.33672e+08	1.58918e+09
G1MHD2	Oxidative stress responsive kinase 1	OXSR1	1.39488e+09	1.49691e+09	1.58742e+09
G1L983	Uncharacterized protein		9.75582e+08	1.67559e+09	1.58506e+09
G1MGF0	Tubulin alpha chain	TUBA8	6.08085e+07	1.19561e+09	1.58268e+09
D2I5P7	OMPdecase domain-containing protein (Fragment)	UMPS	1.47431e+09	1.38493e+09	1.58183e+09
G1LJG4	Ubiquitin carboxyl-terminal hydrolase	USP14	1.03712e+09	1.43582e+09	1.57973e+09
G1M4Y1	Aldo-keto reductase family 1 member A1	AKR1A1	2.60189e+09	1.72402e+09	1.57907e+09
G1LWX6	RAB11 family interacting protein 1	RAB11FIP1	5.33878e+08	1.74723e+09	1.57386e+09
D2HWG8	Uncharacterized protein	PANDA_016815	3.98868e+09	1.88676e+09	1572227449
D2H881	Signal transducer and activator of transcription (Fragment)	PANDA_006420	2.11357e+09	1.2954e+09	1571344445
G1M927	DNA helicase	MCM2	1.87972e+09	1.61466e+09	1.56756e+09
G1M834	Chromodomain helicase DNA binding protein 1	CHD1	1.35686e+08	1.89079e+08	1.5673e+09
G1MGU8	NPL4 homolog, ubiquitin recognition factor	NPLOC4	7.58092e+08	1.8664e+09	1.5672e+09
G1LTK7	Endoplasmic reticulum metallopeptidase 1	ERMP1	6.24053e+08	1.30098e+09	1566738479
G1MAL1	PH domain-containing protein		8.64111e+08	3.86632e+08	1563569147
G1LI10	DZF domain-containing protein	ZFR	8.02897e+08	1.59364e+09	1.56264e+09
D2GUY3	Uncharacterized protein (Fragment)	TPM4	4.66886e+09	2.12713e+09	1.55847e+09
G1L0M0	Thyroid hormone receptor associated protein 3	THRAP3	1.72467e+09	1.78284e+09	1.55829e+09
G1LX92	WHEP-TRS domain-containing protein	WARS	1.06464e+09	1.22722e+09	1.5574e+09
D2GUY8	MHD domain-containing protein (Fragment)	PANDA_000492	1.17619e+09	1.56332e+09	1.55589e+09
G1L1V3	Calcium-transporting ATPase	ATP2B4	1.64296e+09	1.83619e+09	1.5538e+09
D2I1P6	Uncharacterized protein (Fragment)	PANDA_019234	7.31616e+08	1.66196e+09	1.55086e+09
D2HVW4	G_PROTEIN_RECEP_F1_2 domain-containing protein (Fragment)	PANDA_016558	3.04003e+08	2.38007e+09	1.55002e+09
G1L920	Sulfite oxidase	SUOX	7.39927e+08	1.13306e+09	1.54969e+09
G1MC95	Glucosamine-6-phosphate isomerase	GNPDA2	1.4694e+09	1.63524e+09	1.5479e+09
D2HNS6	Uncharacterized protein (Fragment)	PANDA_013375	1.37796e+09	1.30416e+09	1.54609e+09
G1L8X7	Uncharacterized protein	TJP1	2.12842e+09	1.51735e+09	1.54506e+09
G1M832	Uncharacterized protein	ATP5PO	1.13379e+09	8.97482e+08	1.53805e+09
G1LY44	Apoptosis inhibitor 5	API5	2.35841e+09	2.34937e+09	1.53295e+09
G1M5H3	Splicing factor SWAP	SFSWAP	1.34827e+08	7.80842e+07	1.53236e+09
G1M4A3	Proteasome endopeptidase complex	PSMA7	2.482e+09	2.06467e+09	1.53177e+09
G1LCF3	Eukaryotic translation initiation factor 3 subunit F	EIF3F	1.52075e+09	1.43036e+09	1.53142e+09
D2HYQ9	Uncharacterized protein (Fragment)	MBOAT7	8.61158e+08	1.56126e+09	1.52853e+09
G1M9W4	DDHD domain containing 1	DDHD1	1.7372e+09	1.09837e+09	1.5264e+09
D2H9Z8	Uncharacterized protein (Fragment)	PANDA_007195	3.99045e+08	1.71614e+09	1.52331e+09
D2GU95	PPM-type phosphatase domain-containing protein (Fragment)	PPM1B	2.40881e+08	1.51251e+09	1.5206e+09
G1LL61	MYB binding protein 1a	MYBBP1A	3.21155e+09	2.21272e+09	1.51872e+09
G1MH21	Calpain 1	CAPN1	2.15326e+09	1.70018e+09	1.51673e+09
G1MI61	Peptidylprolyl isomerase	FKBP2	7.48752e+08	1.01472e+09	1.51669e+09
G1MC53	Beta-glucuronidase	GUSB	8.17095e+08	1.28855e+09	1.51638e+09
G1LUV7	Eukaryotic translation initiation factor 3 subunit H	EIF3H	1.38217e+09	1.68692e+09	1.51172e+09
G1LH09	Basic leucine zipper and W2 domains 1	BZW1	7.56156e+08	2.43872e+09	1.50958e+09
G1L2J2	STT3 oligosaccharyltransferase complex catalytic subunit A	STT3A	2.50034e+09	1.36312e+09	1.50826e+09
G1MHH9	Uncharacterized protein	SKP1	7.99852e+08	1.36056e+09	1507957752
G1L6T9	IlvB acetolactate synthase like	ILVBL	6.3609e+08	1.7344e+09	1.50676e+09
G1MAF7	Complex1_49kDa domain-containing protein	NDUFS2	1.06503e+09	1.66088e+09	1500972147
G1MC17	SEC13 homolog, nuclear pore and COPII coat complex component	SEC13	2.22095e+09	1.65569e+09	1.49756e+09
G1LUW6	Myosin IXB	MYO9B	1.6781e+09	1.38781e+09	1.49404e+09
G1LHH4	Uncharacterized protein		1.93645e+09	2.04981e+09	1.49327e+09
G1LJ04	GOLD domain-containing protein		8.88339e+08	1.29631e+09	1.4899e+09
G1LTX4	BCL2 associated transcription factor 1	BCLAF1	1.64686e+09	1.49445e+09	1.48967e+09
G1L351	Chitinase domain containing 1	CHID1	7.26358e+08	1.32125e+09	1.48908e+09
G1LXH5	DNA replication licensing factor MCM7	MCM7	2.64047e+09	2.09161e+09	1488056262
D2H345	Uncharacterized protein (Fragment)	PANDA_004079	3.03544e+09	1.56647e+09	1.48665e+09
G1L3E6	Caveolin	CAV1	4.48834e+08	3.05131e+09	1.4851e+09
D2I6A5	Uncharacterized protein (Fragment)	DDX6	1.64531e+09	2.09831e+09	1.4827e+09
D2H0J7	Tumor protein, translationally-controlled 1 (Fragment)	TPT1	1.51805e+09	1.1886e+09	1.48199e+09
G1LU04	Uncharacterized protein	BPNT1	7.55798e+08	1.46593e+09	1.48072e+09
D2I2J1	Uncharacterized protein (Fragment)	PANDA_019617	3.69102e+08	1.46326e+09	1.48053e+09
G1M0I7	ATPase ASNA1	ASNA1	1.09815e+09	1.25534e+09	1.47993e+09
G1LB27	U2 snRNP auxiliary factor large subunit	U2AF2	2.29958e+09	1.60305e+09	1.47848e+09
D2HN54	Uncharacterized protein (Fragment)	PANDA_013094	2.46235e+08	1.78293e+09	1.4763e+09
G1KZH5	Cellular repressor of E1A stimulated genes 1	CREG1	1.46611e+08	1.06947e+09	1.4754e+09
D2HNS5	Uncharacterized protein (Fragment)	PANDA_013374	2.86468e+09	2.02656e+09	1.47411e+09
G1M5E8	SEC7 domain-containing protein	ARFGEF2	5.16884e+08	1.15393e+09	1.47276e+09
G1MHP6	Uncharacterized protein	DDX46	1.73254e+09	1.59163e+09	1.46959e+09
G1LAV0	Protein transport protein sec16	SEC16A	1.17451e+09	1.77533e+09	1.4694e+09
G1L146	Succinate dehydrogenase [ubiquinone] iron-sulfur subunit, mitochondrial	SDHB	1.10156e+09	1.61927e+09	1.46849e+09
G1LCD5	Aldehyde dehydrogenase	ALDH3A2	8.88627e+08	1.90346e+09	1.46736e+09
G1LK47	Tyrosine 3-monooxygenase/tryptophan 5-monooxygenase activation protein eta	YWHAH	6.37894e+08	1.57552e+09	1.46724e+09
D3YBZ7	Ribosomal protein L30	RPL30	3.42088e+09	1.80507e+09	1.46677e+09
G1LS94	Proteasome subunit alpha type	PSMA2	1.03408e+09	1.46758e+09	1.46623e+09
D2HTE5	Uncharacterized protein (Fragment)	PANDA_015437	3.23329e+09	7.58908e+08	1.46499e+09
G1LMF3	Ig-like domain-containing protein	THY1	1.73229e+09	1.60799e+09	1.4625e+09
G1KZL3	Calponin	CNN1	7.07044e+08	1.19611e+09	1.46248e+09
G1M7E6	Small nuclear ribonucleoprotein U1 subunit 70	SNRNP70	1.65867e+09	1.75842e+09	1.46202e+09
G1MFJ2	TPR_REGION domain-containing protein	KLC2	8.78105e+08	2.14028e+09	1.45985e+09
D2HD91	RRM domain-containing protein (Fragment)	RBMX	5.91602e+09	1.84306e+09	1.45752e+09
A9XSS6	Acidic ribosomal phosphoprotein P1	RPLP1	3.32756e+09	1.87758e+09	1.45619e+09
D2HDU4	BSD domain-containing protein (Fragment)	SYAP1	3.42976e+08	1.60935e+09	1.4514e+09
G1MB71	Structural maintenance of chromosomes protein	SMC3	2.0399e+09	1.66703e+09	1.45089e+09
G1LE91	Coiled-coil domain containing 136	CCDC136	2.3808e+08	8.68184e+08	1.44772e+09
G1LBI3	Family with sequence similarity 114 member A2	FAM114A2	3.11173e+08	2.23933e+09	1.44764e+09
G1M6A6	Ran GTPase activating protein 1	RANGAP1	9.62491e+08	1.7416e+09	1.44761e+09
D2HEW1	Inosine-5-monophosphate dehydrogenase (Fragment)	IMPDH2	2.08583e+09	1.52714e+09	1.44617e+09
D2HYA2	Uncharacterized protein (Fragment)	RBM4B	2.20787e+09	1.52515e+09	1.4407e+09
D2HEU6	Peptidase_S9 domain-containing protein (Fragment)	PANDA_009344	8.63172e+08	1.44099e+09	1.43456e+09
G1M447	DExD-box helicase 39A	DDX39A	4.25549e+08	1.3372e+09	1.43439e+09
D2GV72	Uncharacterized protein (Fragment)	LARS2	7.68763e+08	1.67555e+09	1.43396e+09
G1LPD8	Ribosomal protein S16	RPS16	3.27012e+09	2.61215e+09	1.4335e+09
G1LRJ9	Uncharacterized protein		1.95878e+08	1.11161e+09	1.4308e+09
G1MCH4	Nipsnap homolog 2	NIPSNAP2	1.08339e+09	1.00618e+09	1.4287e+09
G1MDG8	Uncharacterized protein	PSME1	1.88246e+09	1.15182e+09	1.42638e+09
G1M3A0	Ribosome biogenesis protein WDR12	WDR12	6.47999e+08	1.44708e+09	1.42622e+09
G1L600	S-adenosylmethionine synthase	MAT2A	1.43407e+09	1.60848e+09	1.42602e+09
G1MEK3	Uncharacterized protein	EHHADH	5.79103e+08	1.13352e+09	1.42597e+09
G1LT74	Eukaryotic translation initiation factor 6	EIF6	1.0521e+09	1.31648e+09	1.42585e+09
G1M1L3	Acyl-CoA synthetase bubblegum family member 1	ACSBG1	3.44919e+08	7.31677e+08	1.42248e+09
G1L9Z5	Myosin light chain 6	MYL6	4.19888e+09	2.8841e+09	1.42114e+09
G1LWM9	NADH dehydrogenase [ubiquinone] iron-sulfur protein 6, mitochondrial	NDUFS6	6.41046e+08	8.84989e+08	1.41821e+09
G1LJE3	MPN domain-containing protein	PSMD7	9.80519e+08	2.00928e+09	1.4161e+09
D2HCX3	Glycylpeptide N-tetradecanoyltransferase (Fragment)	PANDA_008474	4.7302e+08	1.54753e+09	1.4111e+09
G1MGF3	Vacuolar protein sorting 13 homolog C	VPS13C	1.09339e+09	1.2528e+09	1.40814e+09
G1MGM0	Drebrin like	DBNL	7.77049e+08	1.49637e+09	1407724866
G1M0D4	Uncharacterized protein	TLN2	1.64921e+09	1.69653e+09	1.40755e+09
G1MFV7	MHD domain-containing protein		1.39618e+09	1.80094e+09	1.40644e+09
G1LGF5	Zinc finger protein 207	ZNF207	2.13214e+08	3.41826e+08	1.40353e+09
G1MEN9	Uncharacterized protein	OBSL1	4.07415e+08	1.68301e+08	1.40301e+09
D2HMQ1	NAD(P)H quinone dehydrogenase 1 (Fragment)	NQO1	1.75011e+09	1.12796e+09	1.40284e+09
G1MIV7	Uncharacterized protein		3.00905e+08	1.23015e+09	1401362396
D2H0E3	Prenylcys_lyase domain-containing protein (Fragment)	PANDA_002887	1.5795e+09	1.56511e+09	1.39801e+09
D2HMF6	TPR_REGION domain-containing protein (Fragment)	SGTA	6.42855e+08	1.27978e+09	1.39759e+09
G1M7U6	Uncharacterized protein		6.69335e+07	8.58564e+08	1393566320
G1MCI9	Uncharacterized protein	CRELD1	1.05504e+08	4.11021e+08	1.3931e+09
G1MHK4	Phosphoglycolate phosphatase	PGP	3.79921e+08	1.48498e+09	1.39223e+09
G1LSW9	Reticulocalbin 2	RCN2	1.18018e+09	1.55834e+09	1.38991e+09
G1M0U8	Uncharacterized protein	SAFB	1.46436e+09	1.69912e+09	1389846135
G1M0I0	Importin N-terminal domain-containing protein	XPO5	7.60621e+08	1.32107e+09	1.38808e+09
G1LA41	Uncharacterized protein	ACADM	2.37642e+09	1.46202e+09	1387300609
G1MFD2	Uncharacterized protein	HK2	6.69557e+08	1.12524e+09	1.38704e+09
D2I284	Ribonucloprotein (Fragment)	SNU13	2.86871e+09	2.00456e+09	1385963507
G1LZX2	Alkylglycerone-phosphate synthase	AGPS	5.75446e+08	1.32776e+09	1.38496e+09
G1LJ67	YTH domain containing 2	YTHDC2	3.71123e+08	9.72434e+08	1.38463e+09
D2HN60	Annexin (Fragment)	PANDA_013101	1.00111e+10	1.41373e+09	1.38397e+09
G1L5M1	Uncharacterized protein	NID2	1.74847e+09	2.94665e+09	1.38343e+09
D2HKG5	Somatomedin B and thrombospondin type 1 domain containing (Fragment)	SBSPON	1.3987e+08	1.49618e+09	1.38199e+09
G1LZK9	Cartilage intermediate layer protein 2	CILP2	2.58242e+08	3.12741e+09	1.38195e+09
G1MFZ9	TRUD domain-containing protein	PUS7L	1.9726e+08	1.43415e+08	1.37873e+09
G1M041	Eukaryotic translation initiation factor 4B	EIF4B	1.47617e+09	1.60809e+09	1.37434e+09
G1L2N7	J domain-containing protein		9.08136e+08	1.71118e+09	1.37361e+09
G1MG29	Twinfilin actin binding protein 1	TWF1	6.62488e+08	1.36199e+09	1.37335e+09
D2HE03	Uncharacterized protein (Fragment)	NDUFB10	8.76099e+08	1.29774e+09	1.37284e+09
D2H3D2	Uncharacterized protein (Fragment)	PANDA_004194	3.10036e+09	1.41466e+09	1.3701e+09
G1MHJ8	Splicing factor 1	SF1	1.92249e+09	1.21017e+09	1.36908e+09
G1MI46	Thioredoxin	TXN	2.68853e+09	1.06598e+09	1.36655e+09
G1LBZ1	NAC-A/B domain-containing protein	NACA	2.57214e+09	1.73102e+09	1.36594e+09
G1ME21	PAS domain containing serine/threonine kinase	PASK	2.39228e+08	9.01476e+08	1.36578e+09
G1L854	Cullin 1	CUL1	1.0062e+09	1.44066e+09	1.36263e+09
D2HV84	Ubiquitin-like domain-containing protein (Fragment)	PANDA_016258	9.70866e+08	1.49481e+09	1361266498
D2HJX0	SHSP domain-containing protein (Fragment)	ODF1	2.6975e+08	1.1595e+09	1.35651e+09
G1LB87	Poly(A) binding protein interacting protein 1	PAIP1	5.99675e+08	8.76123e+08	1355462267
D2GXJ2	Uncharacterized protein (Fragment)	HNRNPH3	2.95376e+09	2.62297e+09	1.35386e+09
G1M733	FACT complex subunit SSRP1	SSRP1	2.18009e+09	1.84719e+09	1.35231e+09
D2HMF7	Peptidase_M3 domain-containing protein (Fragment)	PANDA_012767	9.77627e+08	1.67861e+09	1.35185e+09
D2GVD4	Uncharacterized protein (Fragment)	PANDA_000678	5.07082e+08	1.18707e+09	1.35013e+09
G1M7K6	Inositol-1-monophosphatase	IMPA1	8.81902e+08	1.90926e+09	1.34958e+09
G1MHI7	Uncharacterized protein		1.00654e+09	1.84115e+09	1.34923e+09
D2H2F2	Uncharacterized protein (Fragment)	PANDA_003803	1.09961e+09	1.09459e+09	1.34882e+09
G1L0T8	TBC1 domain family member 15	TBC1D15	5.72926e+08	9.13413e+08	1.34168e+09
F2X241	Ribosomal protein L8	Rpl8	3.88109e+09	3.4333e+09	1338077547
D2GVV7	Actin related protein 2/3 complex subunit 3 (Fragment)	ARPC3	1.12182e+09	1.1698e+09	1.33796e+09
G1L835	Eukaryotic translation initiation factor 4 gamma 3	EIF4G3	5.93094e+08	1.18813e+09	1.33215e+09
G1L142	Sorting nexin family member 27	SNX27	6.1604e+08	1.17836e+09	1.33086e+09
G1LZG1	Leucine rich repeat containing 59	LRRC59	3.1146e+09	1.64284e+09	1.33046e+09
D2I161	Cysteine rich protein 2 (Fragment)	CRIP2	2.94152e+09	1.38007e+09	1.32987e+09
G1L043	Cullin 4B	CUL4B	1.78814e+09	2.02805e+09	1328624762
G1LBD3	Importin 7	IPO7	1.96935e+09	1.57666e+09	1.32824e+09
G1LXH9	WD_REPEATS_REGION domain-containing protein	WDR5	1.37966e+09	2.04421e+09	1.32698e+09
G1LDG2	N-acetylneuraminate synthase	NANS	1.35552e+09	1.12004e+09	1.32541e+09
G1LE36	Uncharacterized protein	CALU	4.4107e+09	1.91424e+09	1.32353e+09
G1LWK2	Uncharacterized protein	GATD3A	1.98494e+09	1.07638e+09	1.32029e+09
G1M664	Uncharacterized protein	LAMB1	2.6939e+09	2.25532e+09	1.3202e+09
G1M3J7	DNA polymerase	POLD1	4.7949e+08	1.32948e+09	1.32015e+09
G1LUR6	SEC23 interacting protein	SEC23IP	1.30245e+09	1.17551e+09	1.31945e+09
G1LHA7	Beta-hexosaminidase		4.53951e+08	9.21443e+08	1.3191e+09
G1MDY5	Catenin alpha 1	CTNNA1	2.92836e+09	1.25288e+09	1.31629e+09
G1LYG0	Polysacc_synt_4 domain-containing protein	PBDC1	7.57341e+08	3.10447e+09	1.31583e+09
G1LUS1	Stathmin	STMN1	2.9285e+09	2.28402e+09	1.31397e+09
G1LNV2	GrpE protein homolog	GRPEL1	5.21336e+08	1.44064e+09	1.31312e+09
G1LSW8	Eukaryotic translation initiation factor 3 subunit D	EIF3D	1.14746e+09	1.31324e+09	1.31267e+09
D2HL56	Serine/threonine-protein phosphatase (Fragment)	PPP5C	8.6525e+08	1.22499e+09	1.30966e+09
G1LLH9	Syntaxin 4	STX4	2.51525e+08	1.40878e+08	1308513796
G1LC34	Collagen type IV alpha 4 chain	COL4A4	4.38715e+08	1.36876e+09	1.30722e+09
D2HKL0	Ataxin 10 (Fragment)	ATXN10	5.80244e+08	1.42202e+09	1.3069e+09
G1M213	Serine/threonine-protein phosphatase 2A 56 kDa regulatory subunit	PPP2R5D	1.0035e+09	7.92811e+08	1.30676e+09
G1LIU3	Nucleosome assembly protein 1 like 1	NAP1L1	2.21171e+09	1.37574e+09	1.30509e+09
G1LV71	Uncharacterized protein	DYNC2H1	8.42478e+08	2.35391e+09	1.30455e+09
G1LFC4	Folate hydrolase 1	FOLH1	1.8613e+08	1.75425e+09	1.3013e+09
G1MC16	RAB18, member RAS oncogene family	RAB18	6.93656e+08	1.70822e+09	1.30072e+09
G1LPC1	Transcription elongation factor SPT5	SUPT5H	8.07823e+08	9.43095e+08	1.29856e+09
G1LHS9	AP-2 complex subunit alpha	AP2A2	1.77048e+09	1.36229e+09	1.29543e+09
G1MHT9	Uncharacterized protein		1.11993e+09	1.36607e+09	1.29057e+09
D2HNE5	IRG-type G domain-containing protein (Fragment)	PANDA_013208	2.77351e+07	1.3832e+09	1.28903e+09
D2HQ13	Uncharacterized protein (Fragment)	PANDA_013938	1.30842e+09	1.73131e+09	1.2882e+09
G1M1M8	Glutathione peroxidase	GPX1	1.27853e+09	8.94819e+08	1.28766e+09
G1M138	Deoxyribonuclease 2, lysosomal	DNASE2	9.16701e+08	9.09652e+08	1.28721e+09
D2HLV1	GP-PDE domain-containing protein (Fragment)	GDPD1	2.01988e+08	1.59954e+09	1.28636e+09
D2GWP6	ADF-H domain-containing protein (Fragment)	COTL1	1.94767e+09	3.29433e+08	1.28489e+09
D2HQ87	Collagen IV NC1 domain-containing protein (Fragment)	PANDA_014034	1.12447e+09	2.06416e+09	1.28439e+09
G1LJK8	Uncharacterized protein	DST	2.99896e+08	1.10097e+09	1.28386e+09
G1LWC5	DnaJ heat shock protein family (Hsp40) member C13	DNAJC13	7.61897e+08	1.00583e+09	1.27987e+09
G1L888	Lipase maturation factor	LMF2	4.8836e+08	2.09124e+09	1.27839e+09
D3YC00	Ribosomal protein L10	RPL10	2.1661e+09	2.47897e+09	1.27806e+09
G1LZ87	SAP domain-containing protein	SARNP	9.26612e+08	1.09611e+09	1.27714e+09
G1LSP5	G1 to S phase transition 1	GSPT1	7.50145e+08	1.04688e+09	1.27644e+09
G1LCS1	Transmembrane 9 superfamily member	TM9SF2	6.55319e+08	1.32019e+09	1.27579e+09
G1LS01	Large 60S subunit nuclear export GTPase 1	LSG1	2.37661e+08	1.30765e+09	1.27489e+09
D2HYB0	Uncharacterized protein (Fragment)	DPP3	8.04469e+08	1.24473e+09	1.27355e+09
G1LMQ1	Cullin 2	CUL2	7.05935e+08	1.04444e+09	1.27259e+09
[truncated: 9,735 more rows]
