# Supplementary material for: Proteomic analysis of giant panda testicular tissue of different age groups
Source: PeerJ journal article supplement (doi:10.7717/peerj.18249), 2024-10-16
Supplement: Table_S2.xlsx [file Table_S2.xlsx]

## Sheet: Sheet1
Top ten proteins
J8d	F18y	H22y
G1LEJ5	G1LEJ5	D2HU49
D2HU49	D2H496	G1LEJ5
P18970	D2HU49	P18970
G1LVM5	G1LX08	D2H496
G1LP52	G1MDU7	D2HVQ7
D2H496	D2HVQ7	G1LX08
D2HWK1	G1LVM5	G1MDU7
D2HC77	G1M785	G1LJ40
G1M012	P18970	G1M785
D2I822	G1LJ40	G1LVM5
Coexpressed top-ten proteins of three pandas
	J8d	F18y	H22y
G1LEJ5	1.56389e+11	1.64449e+11	1.44796e+11
D2HU49	1.4205e+11	7.08374e+10	2.12645e+11
P18970	1.2166e+11	6.11731e+10	1.4314e+11
G1LVM5	9.41251e+10	6.34731e+10	5.41702e+10
G1LP52	9.34844e+10	4.14796e+10	1.91975e+10
D2H496	9.29102e+10	7.39762e+10	8.10512e+10
G1LX08	4.54129e+10	6.99722e+10	5.87731e+10
G1MDU7	4.23624e+10	6.7043e+10	5.84722e+10
D2HVQ7	3.27235e+10	6.40289e+10	6.43348e+10
